# Supplementary material for: Risk factors and prognostic implications of diagnosis of cancer within 30 days after an emergency hospital admission (emergency presentation): an International Cancer Benchmarking Partnership (ICBP) population-based study
Source: PubMed Central journal article supplement (PMC9046095; doi:10.1016/s1470-2045(22)00127-9), 2022-05
Supplement: mmc1.pdf [file mmc1.pdf]

# THE LANCET Oncology

## Supplementary appendix

This appendix formed part of the original submission and has been peer reviewed. We post it as supplied by the authors.

Supplement to: McPhail S, Swann R, Johnson SA, et al. Risk factors and prognostic implications of diagnosis of cancer within 30 days after an emergency hospital admission (emergency presentation): an International Cancer Benchmarking Partnership (ICBP) population-based study. *Lancet Oncol* 2022; published online April 6. [https://doi.org/10.1016/S1470-2045\(22\)00127-9](https://doi.org/10.1016/S1470-2045(22)00127-9).

**Supplementary Materials** for “Risk factors and prognostic implications of diagnosis of cancer within 30 days after an emergency hospital admission (emergency presentation): An International Cancer Benchmarking Partnership (ICBP) population-based study”

## Supplementary Material 1.

**A. Data sources and operational definitions used to identify emergency presentation (defined as diagnosis of cancer within 30 days after an emergency hospital admission) in participating jurisdictions.** Superscript indicators ‘b’ and ‘n’ denote whether ‘broad’ / ‘narrow’ definitions used (see main paper-Methods, and ‘B’ below).

| Jurisdiction                                                                                                       | Source of hospitalisation data upon which cancer registration data were linked | Hospital inpatient admission codes used to emergency hospitalisation                                                        |
|--------------------------------------------------------------------------------------------------------------------|--------------------------------------------------------------------------------|-----------------------------------------------------------------------------------------------------------------------------|
| <b>Denmark<sup>n</sup></b>                                                                                         | Danish National Patient Registry (NPR) dataset                                 | Inpatient admission coded with admission type: “1”                                                                          |
| <b>Norway<sup>b</sup></b>                                                                                          | Norwegian Patient Registry (NPR)                                               | Episodes registered with an urgency code “Acute”                                                                            |
| <b>England<sup>n</sup></b>                                                                                         | Hospital Episodes Statistics (HES)                                             | Inpatient admission coded with admission type: “21; 22; 23; 24; 28; 2A; 2B; 2D”                                             |
| <b>Northern Ireland<sup>n</sup></b>                                                                                | Patient Administration System (PAS)                                            | Inpatient method of admission category coded as “Emergency”                                                                 |
| <b>Scotland<sup>b</sup></b>                                                                                        | Scottish Morbidity Record 01 (SMR01)                                           | Any record of inpatient admission coded with admission type “30-36, 38, 39” within the same Continuous Inpatient Stay (CIS) |
| <b>Wales<sup>b</sup></b>                                                                                           | Patient Episode Database for Wales (PEDW)                                      | Admission method codes “21-25, 27, 28”                                                                                      |
| <b>Canadian Provinces<sup>b</sup></b> (Alberta, Atlantic Canada, British Columbia, Ontario, Saskatchewan-Manitoba) | Canadian Institutes for Health Information Discharge Abstract Database (DAD)   | Inpatient admissions coded with an emergency entry code (“E”)                                                               |
| <b>New South Wales<sup>n</sup></b>                                                                                 | NSW Admitted Patient Data Collection (APDC)                                    | Inpatient admission coded with admission type: “Emergency”                                                                  |
| <b>Victoria<sup>n</sup></b>                                                                                        | Victorian Admitted Episodes Dataset (VAED)                                     | Admission type: “C” or “O”                                                                                                  |
| <b>New Zealand<sup>b</sup></b>                                                                                     | New Zealand National Minimum Data Set (NDMS) (hospital events)                 | Inpatient admission coded with admission type: “AC”                                                                         |

## B. Figure. Factors likely to be implicated in emergency presentations

Reproduced from Zhou Y, Abel GA, Hamilton W, Pritchard-Jones K, Gross CP, Walter FM, Renzi C, Johnson S, McPhail S, Elliss-Brookes L, Lyratzopoulos G. Diagnosis of cancer as an emergency: a critical review of current evidence. *Nat Rev Clin Oncol.* 2017;14(1):45-56. doi: 10.1038/nrclinonc.2016.155. Epub 2016 Oct 11. PMID: 27725680. <https://www.nature.com/articles/nrclinonc.2016.155> (accessed Feb 17, 2022) – main text reference 4.

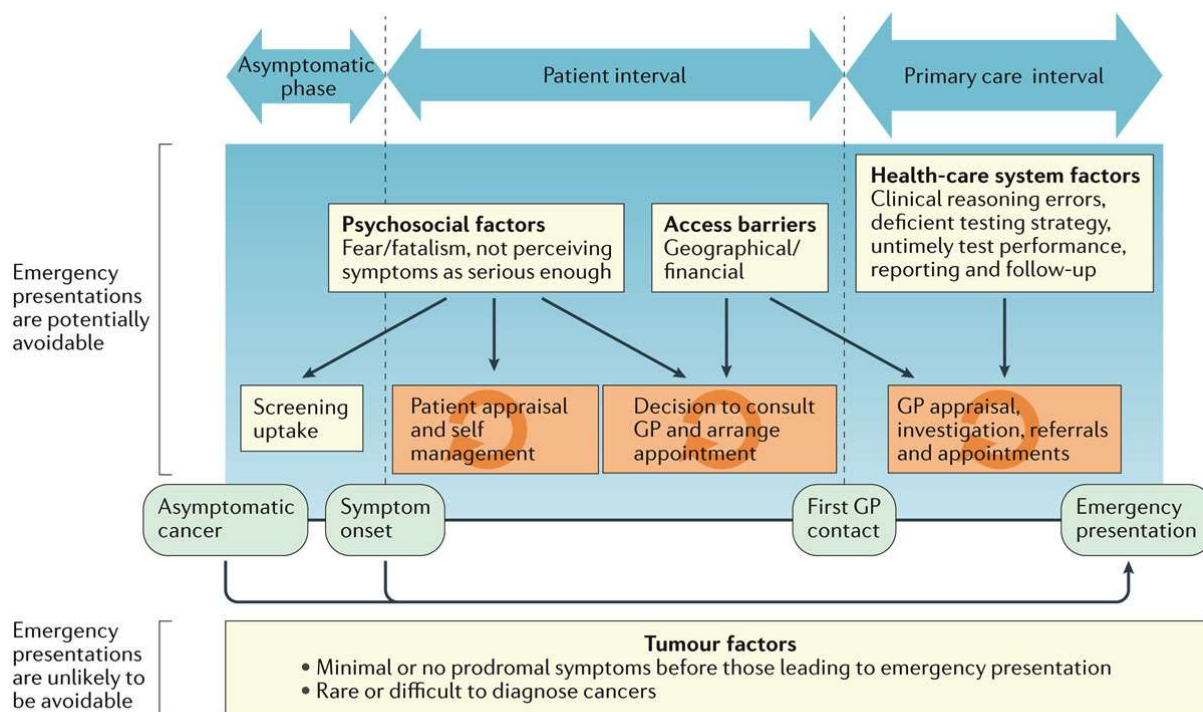

Nature Reviews | Clinical Oncology

**Tumour factors:** Likely to chiefly contribute in the context of inherently aggressive tumours with minimal or no prodromal symptoms. For certain cancer sites (e.g. colorectal) the incidence of inherently aggressive tumours may be prevented *ab initio* through participation to screening, through the detection and resection of adenomatous polyps which would otherwise evolve into invasive tumours. However, for most other cancer sites such events may be deemed largely unavoidable with currently available diagnostic technologies and existing screening programmes.

**Patient factors:** Likely to chiefly contribute in patients with prolonged intervals from symptom onset to help-seeking, or regarding participation to screening. Public health educational interventions raising awareness of possible cancer symptoms, or aimed at reducing cancer fear or fatalism, and increasing participation to screening programmes where available, may help to reduce such occurrences.

**Healthcare factors:** Likely to chiefly contribute in patients who experience prolonged intervals post-presentation, either because their disease progressed making an emergency presentation necessary while awaiting planned investigations, or because the diagnosis of cancer was not suspected and no investigations instigated. Clinical guidelines for specialist assessment and timely access to specialist investigations may help to minimise such risks, though both tumour (e.g. atypical presenting symptoms and/or inherent tumour aggressiveness) and patient factors (e.g. inability to attend for investigations) remain important.

### C. Schematic representation of definition of emergency presentation (including ‘broad’ and ‘narrow’ definition subtypes)

The construct underlying the operational definition of Emergency Presentation (EP) is the occurrence of emergency hospital admission (i.e. emergency inpatient care) during the 30-day period before the diagnosis of cancer. No information about the diagnostic coding relating to the relevant admission episode is required.

This definition is by nature agnostic to actual clinical circumstances that prompted the emergency hospitalisation. To increase the likely specificity of our operational definition as a marker of clinical emergency, it can be required that the relevant emergency hospitalisation event has occurred without an intervening elective hospital admission until the diagnosis date (in the subsequent 30-day period; see Diagram below – particularly ‘Scenario 3’). Where this additional requirement was applied we refer to it as the ‘narrow’ definition, if it is not we refer to it as the ‘broad’ definition. For example, consider that a hypothetical cancer patient has an emergency hospital admission at -20 days pre-diagnosis, and a subsequent elective admission at -10 days. This patient will not be classified as an EP if the ‘narrow’ definition is used (requiring the emergency hospitalisation to be proximal) but will be classed as EP if the ‘broad’ definition is used (not placing any condition on whether emergency hospitalisation during the 30-days pre-diagnosis was or not proximal).

The two definitions are expressions of the same underlying construct and, in our study, we have found both to have similar associations between age group, sex and cancer site and risk of EP (see Table below summarising pooled estimates derived from meta-regression); and also between EP and 12-month mortality (odds ratio 2.86 (2.65-3.08) for jurisdictions using the broad definition, and 3.09 (2.78-3.43) for those using the narrow definition; see also main paper - Figure 1, and appendix p.61.

**Table. Comparison of adjusted associations between age group, sex and cancer site and risk of diagnosis through an emergency presentation, by emergency presentation definition type.**

See also appendix pp.36-42

|                    | Variable    | Pooled estimate across jurisdictions using a broad definition* | Pooled estimate across jurisdictions using a narrow definition* |
|--------------------|-------------|----------------------------------------------------------------|-----------------------------------------------------------------|
| <b>Age group</b>   | 15-64       | 0.99 (0.94-1.03)                                               | 1.04 (0.98-1.10)                                                |
|                    | 65-74       | <i>Reference</i>                                               | <i>Reference</i>                                                |
|                    | 75-84       | 1.35 (1.30-1.40)                                               | 1.43 (1.36-1.49)                                                |
|                    | 85-99       | 2.40 (2.22-2.59)                                               | 2.65 (2.39-2.94)                                                |
| <b>Sex</b>         | Men         | <i>Reference</i>                                               | <i>Reference</i>                                                |
|                    | Women       | 0.99 (0.96-1.03)                                               | 1.02 (0.98-1.06)                                                |
| <b>Cancer site</b> | Oesophageal | 0.78 (0.69-0.88)                                               | 0.81 (0.69-0.95)                                                |
|                    | Stomach     | 1.27 (1.14-1.41)                                               | 1.17 (1.02-1.34)                                                |
|                    | Colon       | <i>Reference</i>                                               | <i>Reference</i>                                                |
|                    | Rectal      | 0.37 (0.34-0.40)                                               | 0.36 (0.32-0.39)                                                |
|                    | Liver       | 1.58 (1.40-1.78)                                               | 1.83 (1.56-2.15)                                                |
|                    | Pancreatic  | 2.02 (1.76-2.32)                                               | 2.18 (1.81-2.63)                                                |
|                    | Lung        | 1.28 (1.15-1.43)                                               | 1.46 (1.27-1.70)                                                |
|                    | Ovarian     | 1.22 (1.05-1.42)                                               | 1.08 (0.88-1.33)                                                |

\*Estimates shown are adjusted for variables shown in the table, and year of diagnosis.

Applying the narrow definition changes the EP status classification of a relatively small group of patients who had both elective and emergency hospital admissions during the 30-day period pre-diagnosis. Jurisdictions using a ‘broad’ definition tend to have a higher % of EP in general, because some patients would not have been classified as EPs had the narrow definition been used (see Diagram, ‘Scenario 3’). Similarly, jurisdictions using a ‘narrow’ definition tend to have a lower % of EP – see example Table for two jurisdictions below. As above, associations between EP and patient-level variables, and between EP and mortality, are similar, independently of the definition type used.

**Table. Impact of using ‘broad’ or ‘narrow’ definition in the same jurisdiction. ‘Broad’ definitions assign a greater number of cases as having been diagnosed as EPs, compared to ‘narrow’ definitions.**

|                                               | Oesophageal | Stomach | Colon | Rectal | Liver | Pancreatic | Lung  | Ovarian | All sites |
|-----------------------------------------------|-------------|---------|-------|--------|-------|------------|-------|---------|-----------|
| <b>England–narrow</b> (as used in main paper) | 19.7%       | 31.4%   | 29.3% | 10.7%  | 42.4% | 47.0%      | 34.7% | 34.8%   | 31.3%     |
| <b>England–broad</b>                          | 23.0%       | 37.0%   | 33.9% | 13.1%  | 47.0% | 55.5%      | 41.6% | 41.7%   | 37.0%     |

|                                                       | Oesophageal | Stomach | Colon | Rectal | Liver | Pancreatic | Lung  | Ovarian | All sites |
|-------------------------------------------------------|-------------|---------|-------|--------|-------|------------|-------|---------|-----------|
| New South Wales–<br>narrow (as used in main<br>paper) | 26.9%       | 30.5%   | 27.6% | 12.1%  | 36.8% | 45.3%      | 36.4% | 28.4%   | 30.9%     |
| New South Wales–<br>broad                             | 31.2%       | 34.8%   | 32.4% | 14.6%  | 40.1% | 50.4%      | 40.2% | 34.8%   | 35.2%     |

A further illustration is provided in the Table below, to help appreciate the above presented data in the context of all jurisdictions.

**Table: Impact of using ‘broad’ or ‘narrow’ definition in the same jurisdiction (England and New South Wales) in the context of all jurisdiction estimates. ‘Broad’ definitions’ assign a greater number of cases as having been diagnosed as EPs, compared to ‘narrow’ definitions.**

|                             | Oesophageal | Stomach | Colon | Rectal | Liver | Pancreatic | Lung  | Ovarian | All sites |
|-----------------------------|-------------|---------|-------|--------|-------|------------|-------|---------|-----------|
| Denmark–narrow              | 24.3%       | 32.2%   | 28.3% | 13.5%  | 43.3% | 48.0%      | 36.4% | 20.6%   | 30.9%     |
| Norway–broad                | 32.7%       | 40.0%   | 35.8% | 15.8%  | 50.6% | 55.4%      | 39.4% | 34.9%   | 36.5%     |
| England–narrow              | 19.7%       | 31.4%   | 29.3% | 10.7%  | 42.4% | 47.0%      | 34.7% | 34.8%   | 31.3%     |
| England–broad               | 23.0%       | 37.0%   | 33.9% | 13.1%  | 47.0% | 55.5%      | 41.6% | 41.7%   | 37.0%     |
| Northern Ireland–narrow     | 19.9%       | 29.6%   | 23.8% | 9.1%   | 36.9% | 42.7%      | 32.0% | 29.6%   | 27.9%     |
| Scotland–broad              | 25.2%       | 39.1%   | 35.1% | 14.1%  | 47.5% | 59.2%      | 42.1% | 42.8%   | 38.5%     |
| Wales–broad                 | 25.5%       | 39.1%   | 34.2% | 13.8%  | 50.5% | 56.7%      | 41.5% | 40.8%   | 37.4%     |
| Alberta–broad               | 23.0%       | 34.6%   | 28.6% | 12.9%  | 31.7% | 40.9%      | 33.3% | 25.7%   | 30.0%     |
| Atlantic Canada–broad       | 20.7%       | 30.4%   | 28.4% | 12.6%  | 34.3% | 38.8%      | 26.6% | 28.1%   | 26.9%     |
| British Columbia–broad      | 28.3%       | 40.3%   | 27.5% | 12.0%  | 38.1% | 41.4%      | 33.2% | 31.7%   | 30.5%     |
| Ontario–broad               | 20.3%       | 26.9%   | 27.2% | 11.0%  | 28.3% | 35.3%      | 27.5% | 23.9%   | 26.1%     |
| Saskatchewan-Manitoba–broad | 18.5%       | 31.8%   | 27.7% | 13.7%  | 33.3% | 37.3%      | 30.6% | 30.1%   | 28.3%     |
| New South Wales–narrow      | 26.9%       | 30.5%   | 27.6% | 12.1%  | 36.8% | 45.3%      | 36.4% | 28.4%   | 30.9%     |
| New South Wales–broad       | 31.2%       | 34.8%   | 32.4% | 14.6%  | 40.1% | 50.4%      | 40.2% | 34.8%   | 35.2%     |
| Victoria–narrow             | 20.0%       | 23.7%   | 22.9% | 9.1%   | 31.9% | 34.1%      | 27.8% | 20.9%   | 24.0%     |
| New Zealand–broad           | 36.8%       | 47.8%   | 36.6% | 19.8%  | 49.7% | 60.4%      | 51.1% | 48.1%   | 42.5%     |

**Diagram:**

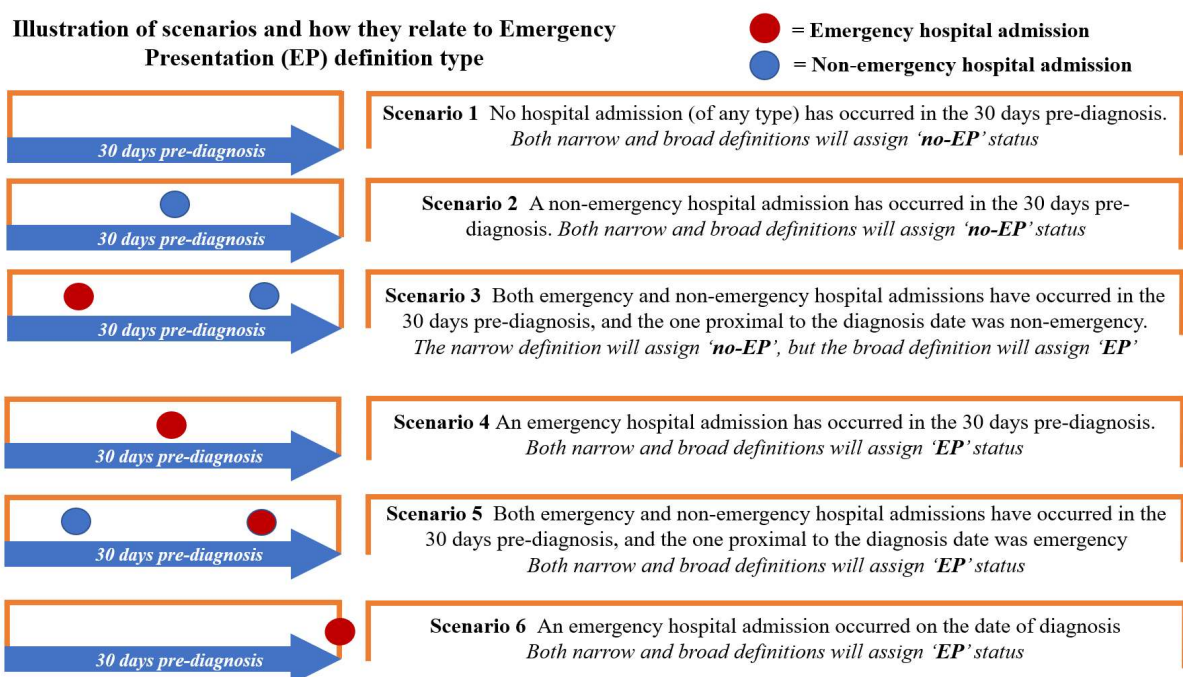

## D. Exploration of yield of alternative cut-off periods in the English data

A 30-day cut-off was chosen for the period preceding the diagnosis of cancer during which the emergency hospital admission defining the emergency presentation ought to have occurred. This was deemed an appropriately short period during which histological diagnosis of cancer, which typically requires an interval of few weeks' duration until a biopsy or excision sample are obtained and processed by the pathology lab, could take place. Additionally, 30-day intervals are used in other established healthcare statistics (e.g. as in '30-day postoperative mortality' or '30-day hospital readmission'). However, we have additionally explored cut-offs at 60 and 90 days in the English data, which indicated that only few cancer patients would have been additionally classified as having been diagnosed through an emergency presentation if such cut-off values were used (see Table). This suggests that in cancer patients who experience an emergency hospital admission shortly before their diagnosis, the emergency hospitalisation event typically leads to prompt subsequent diagnostic resolution (i.e. diagnosis of cancer within 30 days), which is to be expected.

**Table: % of cancer patients with an emergency hospital admission within the 30-days (as used in main analysis) or within 60- and 90-days pre-diagnosis in the England analysis sample; and comparison with English Routes-to-Diagnosis emergency presentation % on the same analysis sample.**

|                    | 30 days cut-off (as used in main analysis) | 60-day cut-off | 90-day cut-off | RTD-defined EP |
|--------------------|--------------------------------------------|----------------|----------------|----------------|
| <b>Oesophageal</b> | 19.7%                                      | 19.9%          | 20.0%          | 19.2%          |
| <b>Stomach</b>     | 31.4%                                      | 31.9%          | 32.0%          | 30.6%          |
| <b>Colon</b>       | 29.3%                                      | 29.8%          | 30.0%          | 28.9%          |
| <b>Rectal</b>      | 10.7%                                      | 11.0%          | 11.1%          | 10.8%          |
| <b>Liver</b>       | 42.4%                                      | 43.9%          | 44.6%          | 41.0%          |
| <b>Pancreatic</b>  | 46.9%                                      | 47.8%          | 48.1%          | 44.7%          |
| <b>Lung</b>        | 34.7%                                      | 35.9%          | 36.6%          | 34.7%          |
| <b>Ovarian</b>     | 34.8%                                      | 35.2%          | 35.4%          | 31.0%          |
| <b>All</b>         | 31.3%                                      | 32.1%          | 32.5%          | 30.7%          |

EP: Emergency Presentation; RTD: Routes-to-Diagnosis.

In the England sub-cohort, our 30-day cut-off definition also provides similar percentage of emergency presentations to that derived by the algorithmically produced English Routes to Diagnosis definition. No attempt was made to use the latter definition as it requires several additional data linkages only applicable to the English health system.

## Supplementary Material 2.

### A. Statistical analysis additional references:

The following references relate to software used in analysis (see main text-Methods).

- Wickham et al., (2019). Welcome to the tidyverse. Journal of Open Source Software, 4(43), 1686, <https://doi.org/10.21105/joss.01686>
- Richard Iannone, Joe Cheng and Barret Schloerke (2021). gt: Easily Create Presentation-Ready Display Tables. R package version 0.3.0. <https://CRAN.R-project.org/package=gt>
- Daniel D. Sjoberg, Michael Curry, Margie Hannum, Joseph Larmarange, Karissa Whiting and Emily C. Zabor (2021). gtsummary: Presentation-Ready Data Summary and Analytic Result Tables. R package version 1.4.2. <https://CRAN.R-project.org/package=gtsummary>
- Joseph Larmarange (2021). labelled: Manipulating Labelled Data. R package version 2.8.0. <https://CRAN.R-project.org/package=labelled>



## B. Analysis sample description and derivation (across the 8 cancer sites studied)

|                                         | Study years | Cases identified (15-99 years of age) | Sex not male/female | Discordant sex-site combination | Death Certificate Only (DCO) | Diagnosis of other primary cancer* | Cases in analysis | % excluded |
|-----------------------------------------|-------------|---------------------------------------|---------------------|---------------------------------|------------------------------|------------------------------------|-------------------|------------|
| Denmark <sup>n</sup>                    | 2014-17     | 53,697                                | 383                 | 13                              | 437                          | 6,861                              | 46,003            | 14.3%      |
| Norway <sup>b</sup>                     | 2012-16     | 49,237                                | 0                   | 85                              | 625                          | 2,380                              | 46,147            | 6.3%       |
| England <sup>n</sup>                    | 2013-16     | 419,643                               | 1                   | 123                             | 4,916                        | 41,409                             | 373,194           | 11.1%      |
| Northern Ireland <sup>n</sup>           | 2012-16     | 17,302                                | 0                   | 0                               | 103                          | 1,698                              | 15,501            | 10.4%      |
| Scotland <sup>b</sup>                   | 2014-17     | 50,886                                | 0                   | 13                              | 135                          | 5,709                              | 45,029            | 11.5%      |
| Wales <sup>b</sup>                      | 2013-16     | 27,875                                | 0                   | 10                              | 636                          | 1,090                              | 26,139            | 6.2%       |
| Alberta <sup>^ b</sup>                  | 2012-15     | 23,012                                | 0                   | 21                              | ...                          | ...                                | 19,969            | 13.2%      |
| Atlantic Canada <sup>^ b \$</sup>       | 2012-15     | 22,445                                | ...                 | ...                             | ...                          | ...                                | 22,125            | 1.4%       |
| British Columbia <sup>^ b \$</sup>      | 2012-15     | 34,110                                | ...                 | ...                             | ...                          | ...                                | 33,655            | 1.3%       |
| Ontario <sup>b</sup>                    | 2012-16     | 116,498                               | 0                   | 376                             | 10,326                       | 13,337                             | 92,447            | 20.6%      |
| Saskatchewan-Manitoba <sup>^ b \$</sup> | 2012-15     | 16,840                                | ...                 | ...                             | ...                          | ...                                | 16,655            | 1.1%       |
| New South Wales <sup>n</sup>            | 2012-16     | 59,998                                | 0                   | 0                               | 1,204                        | 5,596                              | 53,198            | 11.3%      |
| Victoria <sup>n</sup>                   | 2012-16     | 43,713                                | 0                   | 6                               | 1,423                        | 4,072                              | 38,212            | 12.6%      |
| New Zealand <sup>b</sup>                | 2012-15     | 29,363                                | 6                   | 51                              | 512                          | 0                                  | 28,794            | 1.9%       |
| <b>Total</b>                            |             | 964,619                               | 390                 | 698                             | 20,317                       | 82,152                             | 857,068           | 11.1%      |

Superscript indicators ‘n’ and ‘b’ describe whether a narrow or broad operational definition of emergency presentation was used – please also see main paper-Methods, and appendix pp.4-5.

\* During 5 years prior to 1 year after index cancer diagnosis, or during the study period (the latter was applied in Atlantic Canada, British Columbia, Ontario, Saskatchewan-Manitoba).

“...”: Denotes data suppression due to small counts.

<sup>^</sup> A different analysis sample was used to examining adjusted associations with mortality, specifically, 25,182 for Alberta (cases diagnosed 2012-16), 10,970 for Atlantic Canada (2012-13), 16,490 for British Columbia (2012-13), and 8,385 for Saskatchewan-Manitoba (2012-13), reflecting different study years for which mortality follow-up was available.

<sup>\$</sup> To comply with requirements for minimising residual disclosure risk, all actual counts for these jurisdictions were randomly rounded to a higher or lower multiple of 5 within cells. Sample sizes used in different aspects of the analysis may vary minimally for this reason.

|                                      | Analysed cases sample size (for predictors) | Study years (for predictors) | Analysed cases sample size / crude mortality | Study years (for crude mortality) | Analysed cases (mortality regression) | Study years (for mortality regression) |
|--------------------------------------|---------------------------------------------|------------------------------|----------------------------------------------|-----------------------------------|---------------------------------------|----------------------------------------|
| Denmark <sup>n</sup>                 | 46,003                                      | 2014-2017                    | 46,003                                       | As column 3                       | 46,003                                | As column 3                            |
| Norway <sup>b</sup>                  | 46,147                                      | 2012-2016                    | 46,147                                       | As column 3                       | 46,147                                | As column 3                            |
| England <sup>n</sup>                 | 373,194                                     | 2013-2016                    | 373,194                                      | As column 3                       | 373,194                               | As column 3                            |
| Northern Ireland <sup>n</sup>        | 15,501                                      | 2012-2016                    | 15,501                                       | As column 3                       | 15,501                                | As column 3                            |
| Scotland <sup>b</sup>                | 45,029                                      | 2014-2017                    | 45,029                                       | As column 3                       | 45,029                                | As column 3                            |
| Wales <sup>b</sup>                   | 26,139                                      | 2013-2016                    | 26,139                                       | As column 3                       | 26,139                                | As column 3                            |
| Alberta <sup>^ b</sup>               | 19,969                                      | 2012-2015                    | 9,440                                        | 2012-2013                         | 25,182                                | 2012-2016                              |
| Atlantic Canada <sup>^ b</sup>       | 22,125                                      | 2012-2015                    | 10,970                                       | 2012-2013                         | 10,970                                | As column 5                            |
| British Columbia <sup>^ b</sup>      | 33,655                                      | 2012-2015                    | 16,490                                       | 2012-2013                         | 16,490                                | As column 5                            |
| Ontario <sup>b</sup>                 | 92,447                                      | 2012-2016                    | 92,447                                       | As column 3                       | 92,447                                | As column 3                            |
| Saskatchewan-Manitoba <sup>^ b</sup> | 16,655                                      | 2012-2015                    | 8,385                                        | 2012-2013                         | 8,385                                 | As column 5                            |
| New South Wales <sup>n</sup>         | 53,198                                      | 2012-2016                    | 53,198                                       | As column 3                       | 53,198                                | As column 3                            |
| Victoria <sup>n</sup>                | 38,212                                      | 2012-2016                    | 38,212                                       | As column 3                       | 38,212                                | As column 3                            |
| New Zealand <sup>b</sup>             | 28,794                                      | 2012-2015                    | 28,794                                       | As column 3                       | 28,794                                | As column 3                            |

Superscript indicators ‘n’ and ‘b’ describe whether a narrow or broad operational definition of emergency presentation was used – please also see main paper-Methods, and appendix pp.4-5.

### Supplementary Material 3. Analysis sample composition, by cancer site, age group, sex, within each jurisdiction

The composition of analysis samples in each jurisdiction was generally similar regarding cancer site, age group and sex. For example, considering cancer site, the percentage of patients with pancreatic cancer ranged between 6.5% (Atlantic Canada) to 8.5% (New South Wales), and with rectal cancer from 7.9% (Scotland) to 13.1% (Denmark). Regarding age groups, the percentage of patients aged 85 years and over varied from 7.7% (Denmark) to 13.7% (England). The sex composition of analysed patients was highly similar between jurisdictions (with/without inclusion of ovarian cancer from such calculations).

#### A. Analysis sample composition by cancer site

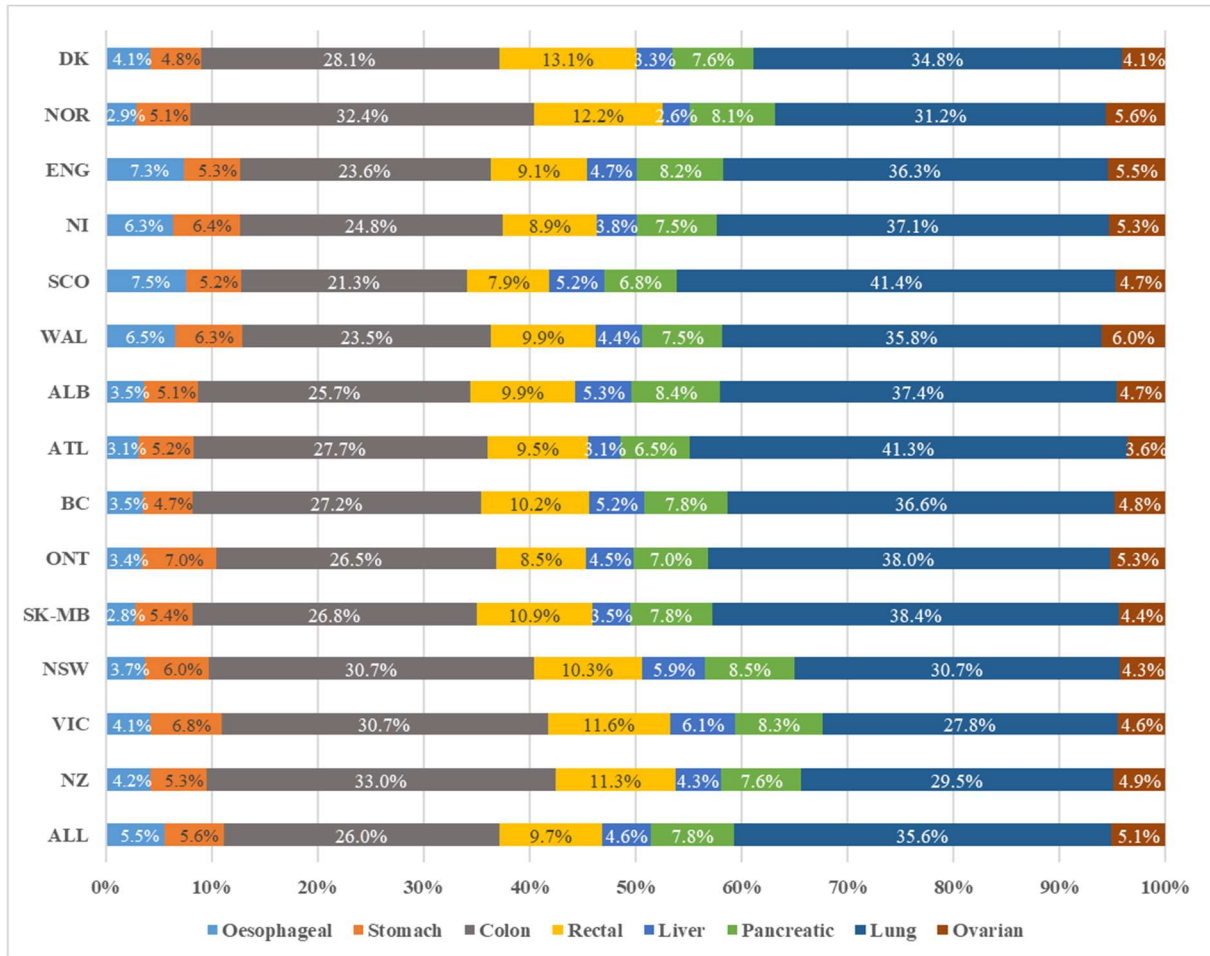

DK: Denmark; NOR: Norway; ENG: England; NI: Northern Ireland; SCO: Scotland; WAL: Wales; ALB: Alberta; ATL: Atlantic; BC: British Columbia; ONT: Ontario; SK-MB: Saskatchewan-Manitoba; NSW: New South Wales; VIC: Victoria; NZ: New Zealand; ALL: All jurisdictions.

## B. Analysis sample composition by age group

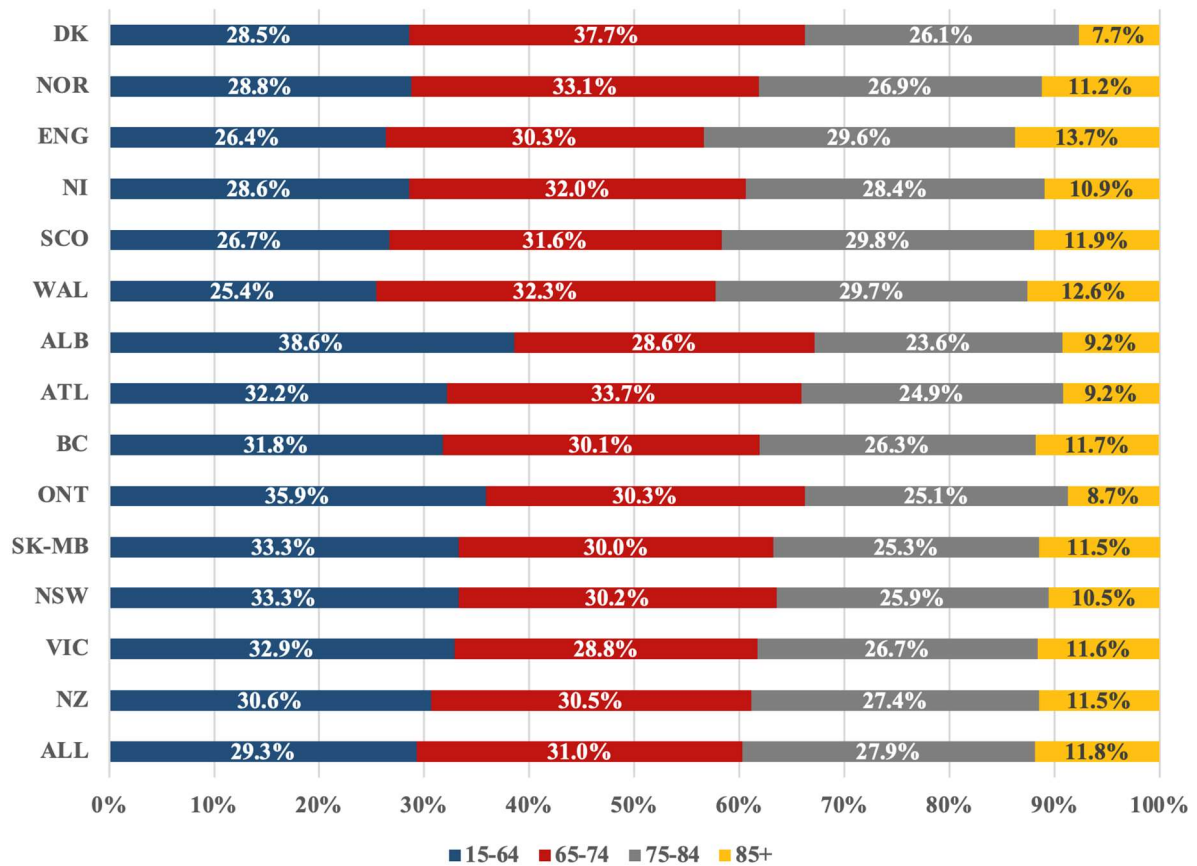

DK: Denmark; NOR: Norway; ENG: England; NI: Northern Ireland; SCO: Scotland; WAL: Wales; ALB: Alberta; ATL: Atlantic; BC: British Columbia; ONT: Ontario; SK-MB: Saskatchewan-Manitoba; NSW: New South Wales; VIC: Victoria; NZ: New Zealand; ALL: All jurisdictions.

### C. Analysis sample composition by sex

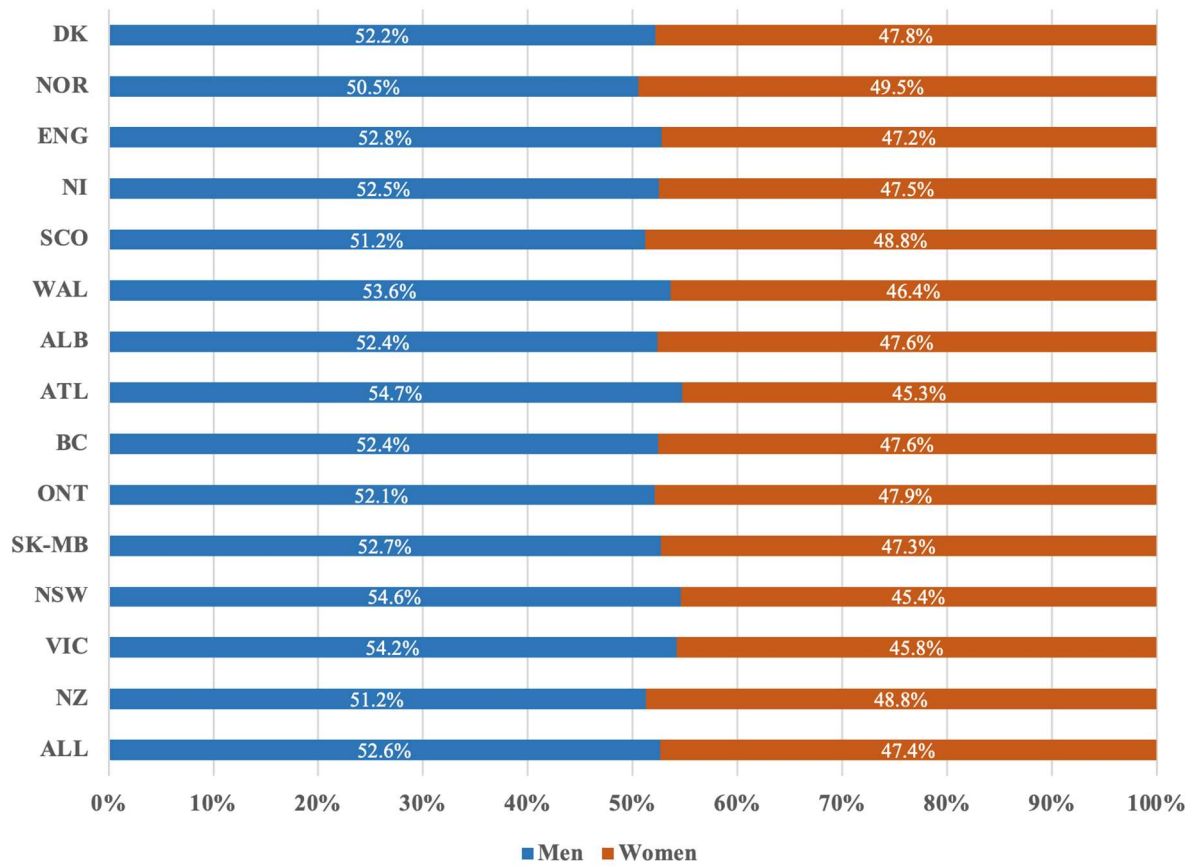

DK: Denmark; NOR: Norway; ENG: England; NI: Northern Ireland; SCO: Scotland; WAL: Wales; ALB: Alberta; ATL: Atlantic; BC: British Columbia; ONT: Ontario; SK-MB: Saskatchewan-Manitoba; NSW: New South Wales; VIC: Victoria; NZ: New Zealand; ALL: All jurisdictions.

## Supplementary Material 4. Description of stage completeness

### Stage completeness (% included cases) by jurisdiction and cancer site

|                                                | All<br>cancers | Oesophagus | Stomach | Colon | Rectal | Liver | Pancreatic | Lung | Ovarian |
|------------------------------------------------|----------------|------------|---------|-------|--------|-------|------------|------|---------|
| <b>Denmark <sup>n</sup></b>                    | 75%            | 64%        | 68%     | 67%   | 61%    | 57%   | 72%        | 94%  | 68%     |
| <b>Norway <sup>b</sup></b>                     | 88%            | 65%        | 71%     | 94%   | 89%    | 65%   | 80%        | 89%  | 94%     |
| <b>England <sup>n</sup></b>                    | 84%            | 81%        | 75%     | 88%   | 90%    | 42%   | 73%        | 91%  | 83%     |
| <b>Northern Ireland <sup>n</sup></b>           | 85%            | 70%        | 68%     | 90%   | 94%    | 54%   | 76%        | 91%  | 88%     |
| <b>Scotland <sup>b</sup></b>                   | 85%            | 77%        | 71%     | 85%   | 85%    | 57%   | 81%        | 92%  | 87%     |
| <b>Wales <sup>b</sup></b>                      | 83%            | 83%        | 80%     | 88%   | 90%    | 31%   | 69%        | 91%  | 72%     |
| <b>Alberta <sup>b</sup></b>                    | 95%            | 85%        | 87%     | 95%   | 93%    | 89%   | 94%        | 99%  | 97%     |
| <b>Atlantic Canada <sup>b</sup></b>            | 89%            | 66%        | 54%     | 96%   | 94%    | 51%   | 58%        | 98%  | 65%     |
| <b>British Columbia <sup>b</sup></b>           | ...            | ...        | ...     | 90%   | 83%    | ...   | ...        | 94%  | ...     |
| <b>Ontario <sup>b</sup></b>                    | 83%            | 53%        | 41%     | 93%   | 91%    | 48%   | 58%        | 96%  | 67%     |
| <b>Saskatchewan-<br/>Manitoba <sup>b</sup></b> | 95%            | 89%        | 87%     | 95%   | 93%    | 70%   | 95%        | 99%  | 97%     |
| <b>New South Wales <sup>n</sup></b>            | 88%            | 82%        | 82%     | 93%   | 86%    | 78%   | 86%        | 86%  | 93%     |
| <b>Victoria <sup>n</sup></b>                   | ...            | ...        | ...     | 90%   | 79%    | ...   | ...        | ...  | ...     |
| <b>New Zealand <sup>b</sup></b>                | 70%            | 36%        | 55%     | 87%   | 56%    | 38%   | 66%        | 67%  | 92%     |
| <b>Average across<br/>jurisdictions</b>        |                | 76%        | 69%     | 89%   | 78%    | 50%   | 73%        | 92%  | 78%     |

Superscript indicators 'n' and 'b' describe whether a narrow or broad operational definition of emergency presentation was used – please also see main paper-Methods and appendix pp.4-5.

“...”: Denotes that no data were submitted for stage

**Supplementary Material 5. Correlations of % of emergency presentations (defined as diagnosis of cancer within 30 days after an emergency hospital admission) by cancer site across jurisdictions. 13 pair-wise correlation values are shown (against England, chosen as the jurisdiction with the largest sample size).**

| Two-country comparison<br>(pairwise correlations of cancer site-specific<br>percentages of emergency presentation) | Pearson <i>r</i> * |
|--------------------------------------------------------------------------------------------------------------------|--------------------|
| England - Denmark                                                                                                  | 0.88               |
| England - Norway                                                                                                   | 0.95               |
| England - Northern Ireland                                                                                         | 0.99               |
| England - Scotland                                                                                                 | 0.99               |
| England - Wales                                                                                                    | 1.00               |
| England - Alberta                                                                                                  | 0.90               |
| England - Atlantic Canada                                                                                          | 0.97               |
| England - British Columbia                                                                                         | 0.88               |
| England - Ontario                                                                                                  | 0.93               |
| England - Saskatchewan-Manitoba                                                                                    | 0.97               |
| England - New South Wales                                                                                          | 0.93               |
| England - Victoria                                                                                                 | 0.94               |
| England - New Zealand                                                                                              | 0.94               |

\* For all comparisons shown,  $p < 0.002$

Whether differences in emergency presentation frequency between the studied cancer sites were consistent across the jurisdictions was examined by correlating the cancer-site specific percentage of emergency presentations in England, the participating jurisdiction with the largest sample size, with the corresponding percentages in each other jurisdiction, resulting in 13 pair-wise correlations each containing eight pairs of observations.

Supplementary Material 6.

A. Figure. Percentage of patients diagnosed through emergency presentation (defined as diagnosis of cancer within 30 days after an emergency hospital admission) by age group, sex, and stage at diagnosis. Data visualised in this figure are included in appendix pp.15-28. For jurisdictions using four-group stage classification, the middle groups were aggregated into a single category.

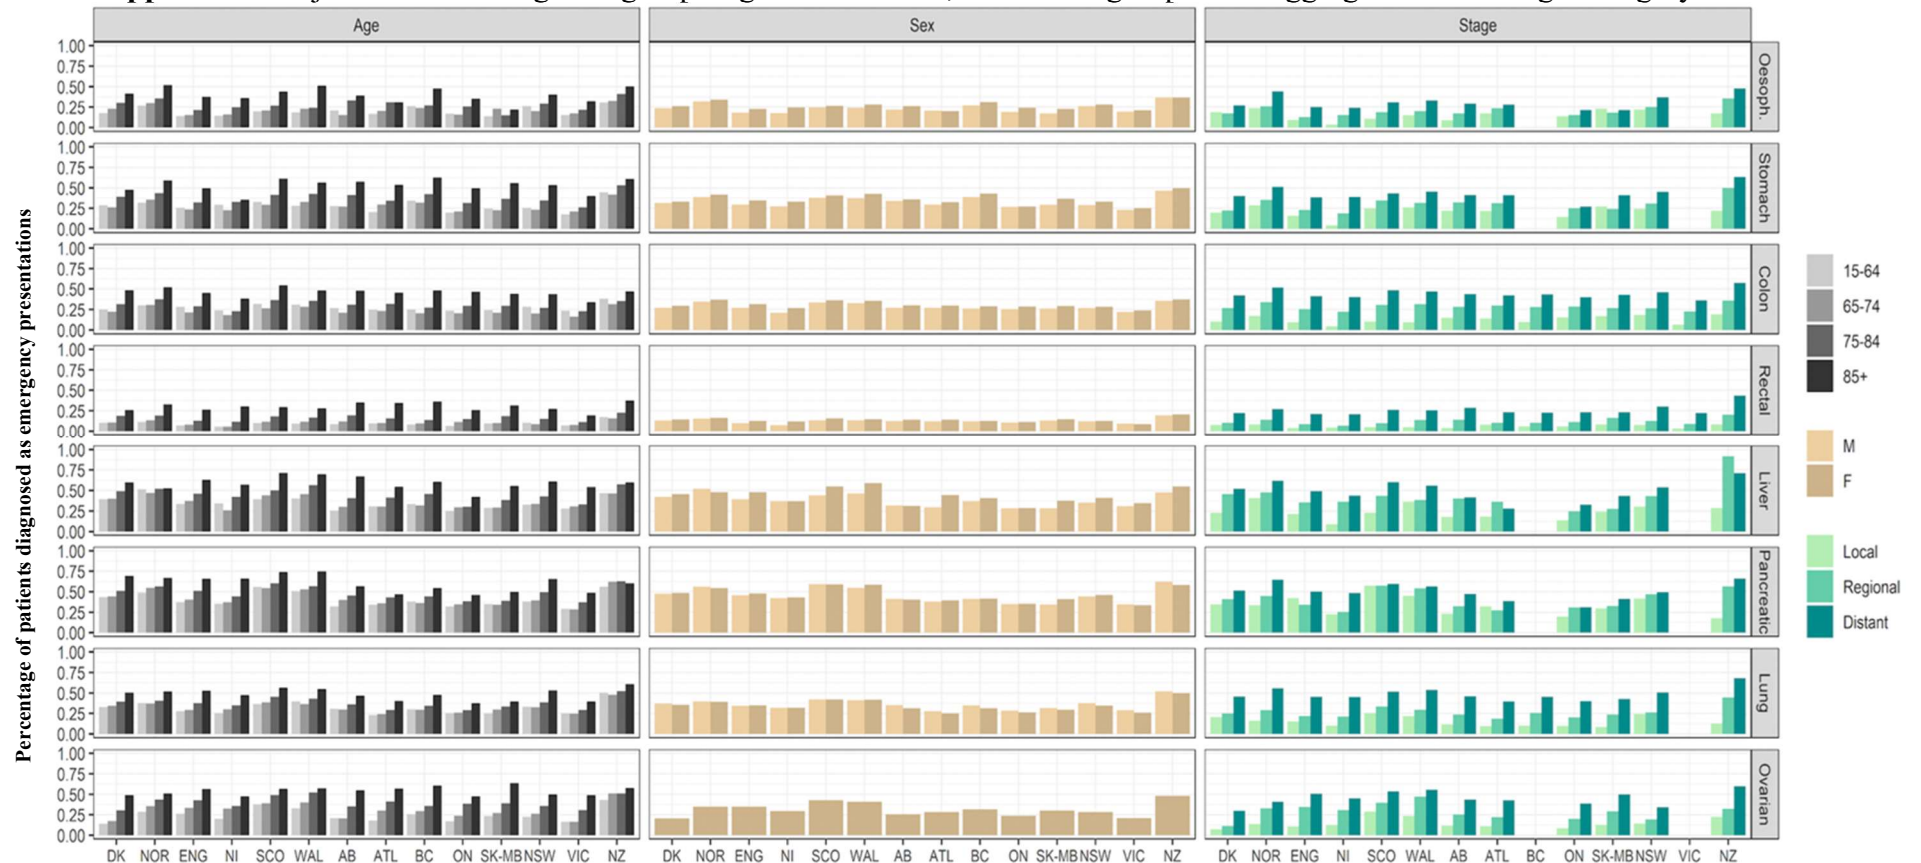

DK: Denmark; NOR: Norway; ENG: England; NI: Northern Ireland; SCO: Scotland; WAL: Wales; AB: Alberta; ATL: Atlantic; BC: British Columbia; ON: Ontario; SK-MB: Saskatchewan-Manitoba; NSW: New South Wales; VIC: Victoria; NZ: New Zealand; Oesoph: Oesophageal; M: Male; F: Female.

**B. Included patients, and patients who presented through an emergency presentation (defined as diagnosis of cancer within 30 days after an emergency hospital admission), with accompanying % value and 95% confidence intervals, by jurisdiction, cancer site, sex, diagnosis year, age group and stage at diagnosis**

| Denmark               |                | Oesophageal |     |       |                | Stomach    |       |       |                | Colon  |       |       |                | Rectal  |     |       |                |             |        |       |                |  |
|-----------------------|----------------|-------------|-----|-------|----------------|------------|-------|-------|----------------|--------|-------|-------|----------------|---------|-----|-------|----------------|-------------|--------|-------|----------------|--|
|                       |                | All         | EP  | %EP   | 95% CI         | All        | EP    | %EP   | 95% CI         | All    | EP    | %EP   | 95% CI         | All     | EP  | %EP   | 95% CI         |             |        |       |                |  |
|                       | <b>Total</b>   | 1,896       | 461 | 24.3% | (22.4%, 26.3%) | 2,231      | 719   | 32.2% | (30.3%, 34.2%) | 12,928 | 3,655 | 28.3% | (27.5%, 29.1%) | 6,005   | 811 | 13.5% | (12.7%, 14.4%) |             |        |       |                |  |
| <b>Sex</b>            | <b>Male</b>    | 1,373       | 323 | 23.5% | (21.4%, 25.8%) | 1,477      | 468   | 31.7% | (29.4%, 34.1%) | 6,643  | 1,801 | 27.1% | (26.1%, 28.2%) | 3,677   | 481 | 13.1% | (12.0%, 14.2%) |             |        |       |                |  |
|                       | <b>Female</b>  | 523         | 138 | 26.4% | (22.8%, 30.3%) | 754        | 251   | 33.3% | (30.0%, 36.7%) | 6,285  | 1,854 | 29.5% | (28.4%, 30.6%) | 2,328   | 330 | 14.2% | (12.8%, 15.7%) |             |        |       |                |  |
| <b>Diagnosis year</b> | <b>2012</b>    | ...         | ... | ...   | ...            | ...        | ...   | ...   | ...            | ...    | ...   | ...   | ...            | ...     | ... | ...   | ...            |             |        |       |                |  |
|                       | <b>2013</b>    | ...         | ... | ...   | ...            | ...        | ...   | ...   | ...            | ...    | ...   | ...   | ...            | ...     | ... | ...   | ...            |             |        |       |                |  |
|                       | <b>2014</b>    | 439         | 111 | 25.3% | (21.4%, 29.6%) | 547        | 196   | 35.8% | (31.9%, 39.9%) | 3,098  | 958   | 30.9% | (29.3%, 32.6%) | 1,570   | 224 | 14.3% | (12.6%, 16.1%) |             |        |       |                |  |
|                       | <b>2015</b>    | 474         | 113 | 23.8% | (20.2%, 27.9%) | 539        | 192   | 35.6% | (31.7%, 39.8%) | 3,248  | 900   | 27.7% | (26.2%, 29.3%) | 1,553   | 207 | 13.3% | (11.7%, 15.1%) |             |        |       |                |  |
|                       | <b>2016</b>    | 477         | 128 | 26.8% | (23.1%, 31.0%) | 569        | 179   | 31.5% | (27.8%, 35.4%) | 3,257  | 910   | 27.9% | (26.4%, 29.5%) | 1,405   | 189 | 13.5% | (11.8%, 15.3%) |             |        |       |                |  |
|                       | <b>2017</b>    | 506         | 109 | 21.5% | (18.2%, 25.3%) | 576        | 152   | 26.4% | (23.0%, 30.1%) | 3,325  | 887   | 26.7% | (25.2%, 28.2%) | 1,477   | 191 | 12.9% | (11.3%, 14.7%) |             |        |       |                |  |
| <b>Age group</b>      | <b>15-64</b>   | 610         | 107 | 17.5% | (14.7%, 20.8%) | 729        | 210   | 28.8% | (25.6%, 32.2%) | 3,257  | 815   | 25.0% | (23.6%, 26.5%) | 2,038   | 211 | 10.4% | (9.1%, 11.8%)  |             |        |       |                |  |
|                       | <b>65-74</b>   | 724         | 168 | 23.2% | (20.3%, 26.4%) | 730        | 191   | 26.2% | (23.1%, 29.5%) | 4,783  | 1,065 | 22.3% | (21.1%, 23.5%) | 2,160   | 230 | 10.6% | (9.4%, 12.0%)  |             |        |       |                |  |
|                       | <b>75-84</b>   | 425         | 129 | 30.4% | (26.2%, 34.9%) | 577        | 225   | 39.0% | (35.1%, 43.0%) | 3,565  | 1,132 | 31.8% | (30.2%, 33.3%) | 1,348   | 251 | 18.6% | (16.6%, 20.8%) |             |        |       |                |  |
|                       | <b>85+</b>     | 137         | 57  | 41.6% | (33.7%, 50%)   | 195        | 93    | 47.7% | (40.8%, 54.7%) | 1,323  | 643   | 48.6% | (45.9%, 51.3%) | 459     | 119 | 25.9% | (22.1%, 30.1%) |             |        |       |                |  |
| <b>Stage</b>          | <b>1</b>       | 106         | 20  | 18.9% | (12.6%, 27.4%) | 240        | 47    | 19.6% | (15.1%, 25.1%) | 1,820  | 188   | 10.3% | (9.0%, 11.8%)  | 1,067   | 83  | 7.8%  | (6.3%, 9.5%)   |             |        |       |                |  |
|                       | <b>2</b>       | 145         | 25  | 17.2% | (12.0%, 24.2%) | 359        | 70    | 19.5% | (15.7%, 23.9%) | 2,587  | 631   | 24.4% | (22.8%, 26.1%) | 822     | 85  | 10.3% | (8.4%, 12.6%)  |             |        |       |                |  |
|                       | <b>3</b>       | 448         | 70  | 15.6% | (12.6%, 19.3%) | 218        | 49    | 22.5% | (17.4%, 28.5%) | 1,756  | 472   | 26.9% | (24.9%, 29.0%) | 843     | 86  | 10.2% | (8.3%, 12.4%)  |             |        |       |                |  |
|                       | <b>4</b>       | 518         | 141 | 27.2% | (23.6%, 31.2%) | 707        | 283   | 40.0% | (36.5%, 43.7%) | 2,435  | 1,035 | 42.5% | (40.6%, 44.5%) | 906     | 203 | 22.4% | (19.8%, 25.2%) |             |        |       |                |  |
|                       | <b>Unknown</b> | 679         | 205 | 30.2% | (26.9%, 33.7%) | 707        | 270   | 38.2% | (34.7%, 41.8%) | 4,330  | 1,329 | 30.7% | (29.3%, 32.1%) | 2,367   | 354 | 15.0% | (13.6%, 16.4%) |             |        |       |                |  |
|                       |                | Liver       |     |       |                | Pancreatic |       |       |                | Lung   |       |       |                | Ovarian |     |       |                | All cancers |        |       |                |  |
|                       |                | All         | EP  | %EP   | 95% CI         | All        | EP    | %EP   | 95% CI         | All    | EP    | %EP   | 95% CI         | All     | EP  | %EP   | 95% CI         | All         | EP     | %EP   | 95% CI         |  |
|                       | <b>Total</b>   | 1,541       | 668 | 43.3% | (40.9%, 45.8%) | 3,491      | 1,674 | 48.0% | (46.3%, 49.6%) | 16,003 | 5,818 | 36.4% | (35.6%, 37.1%) | 1,908   | 393 | 20.6% | (18.8%, 22.5%) | 46,003      | 14,199 | 30.9% | (30.4%, 31.3%) |  |
| <b>Sex</b>            | <b>Male</b>    | 1,081       | 458 | 42.4% | (39.5%, 45.3%) | 1,795      | 852   | 47.5% | (45.2%, 49.8%) | 7,970  | 2,951 | 37.0% | (36.0%, 38.1%) | 1,908   | 393 | 20.6% | (18.8%, 22.5%) | 24,016      | 7,334  | 30.5% | (30.0%, 31.1%) |  |
|                       | <b>Female</b>  | 460         | 210 | 45.7% | (41.2%, 50.2%) | 1,696      | 822   | 48.5% | (46.1%, 50.8%) | 8,033  | 2,867 | 35.7% | (34.6%, 36.7%) | 1,908   | 393 | 20.6% | (18.8%, 22.5%) | 21,987      | 6,865  | 31.2% | (30.6%, 31.8%) |  |
| <b>Diagnosis year</b> | <b>2012</b>    | ...         | ... | ...   | ...            | ...        | ...   | ...   | ...            | ...    | ...   | ...   | ...            | ...     | ... | ...   | ...            | ...         | ...    | ...   | ...            |  |
|                       | <b>2013</b>    | ...         | ... | ...   | ...            | ...        | ...   | ...   | ...            | ...    | ...   | ...   | ...            | ...     | ... | ...   | ...            | ...         | ...    | ...   | ...            |  |
|                       | <b>2014</b>    | 384         | 178 | 46.4% | (41.4%, 51.4%) | 859        | 423   | 49.2% | (45.9%, 52.6%) | 4,011  | 1,563 | 39.0% | (37.5%, 40.5%) | 446     | 97  | 21.7% | (18.2%, 25.8%) | 11,354      | 3,750  | 33.0% | (32.2%, 33.9%) |  |
|                       | <b>2015</b>    | 370         | 163 | 44.1% | (39.1%, 49.1%) | 835        | 398   | 47.7% | (44.3%, 51.1%) | 3,916  | 1,456 | 37.2% | (35.7%, 38.7%) | 488     | 106 | 21.7% | (18.3%, 25.6%) | 11,423      | 3,535  | 30.9% | (30.1%, 31.8%) |  |
|                       | <b>2016</b>    | 415         | 192 | 46.3% | (41.5%, 51.1%) | 835        | 405   | 48.5% | (45.1%, 51.9%) | 4,023  | 1,454 | 36.1% | (34.7%, 37.6%) | 485     | 92  | 19.0% | (15.7%, 22.7%) | 11,466      | 3,549  | 31.0% | (30.1%, 31.8%) |  |
|                       | <b>2017</b>    | 372         | 135 | 36.3% | (31.6%, 41.3%) | 962        | 448   | 46.6% | (43.4%, 49.7%) | 4,053  | 1,345 | 33.2% | (31.8%, 34.7%) | 489     | 98  | 20.0% | (16.7%, 23.8%) | 11,760      | 3,365  | 28.6% | (27.8%, 29.4%) |  |
| <b>Age group</b>      | <b>15-64</b>   | 483         | 190 | 39.3% | (35.1%, 43.8%) | 933        | 404   | 43.3% | (40.2%, 46.5%) | 4,320  | 1,425 | 33.0% | (31.6%, 34.4%) | 761     | 106 | 13.9% | (11.6%, 16.6%) | 13,131      | 3,468  | 26.4% | (25.7%, 27.2%) |  |
|                       | <b>65-74</b>   | 582         | 233 | 40.0% | (36.1%, 44.1%) | 1,325      | 588   | 44.4% | (41.7%, 47.1%) | 6,397  | 2,200 | 34.4% | (33.2%, 35.6%) | 635     | 110 | 17.3% | (14.6%, 20.5%) | 17,336      | 4,785  | 27.6% | (26.9%, 28.3%) |  |
|                       | <b>75-84</b>   | 376         | 185 | 49.2% | (44.2%, 54.2%) | 948        | 484   | 51.1% | (47.9%, 54.2%) | 4,354  | 1,723 | 39.6% | (38.1%, 41%)   | 402     | 123 | 30.6% | (26.3%, 35.3%) | 11,995      | 4,252  | 35.4% | (34.6%, 36.3%) |  |
|                       | <b>85+</b>     | 100         | 60  | 60.0% | (50.2%, 69.1%) | 285        | 198   | 69.5% | (63.9%, 74.5%) | 932    | 470   | 50.4% | (47.2%, 53.6%) | 110     | 54  | 49.1% | (39.9%, 58.3%) | 3,541       | 1,694  | 47.8% | (46.2%, 49.5%) |  |
| <b>Stage</b>          | <b>1</b>       | 140         | 32  | 22.9% | (16.7%, 30.5%) | 112        | 39    | 34.8% | (26.6%, 44%)   | 2,236  | 464   | 20.8% | (19.1%, 22.5%) | 256     | 18  | 7.0%  | (4.5%, 10.8%)  | 5,977       | 891    | 14.9% | (14.0%, 15.8%) |  |
|                       | <b>2</b>       | 323         | 92  | 28.5% | (23.8%, 33.6%) | 493        | 155   | 31.4% | (27.5%, 35.7%) | 1,258  | 264   | 21.0% | (18.8%, 23.3%) | 77      | 7   | 9.1%  | (4.5%, 17.6%)  | 6,064       | 1,329  | 21.9% | (20.9%, 23%)   |  |
|                       | <b>3</b>       | 70          | 32  | 45.7% | (34.6%, 57.3%) | 244        | 100   | 41.0% | (35.0%, 47.2%) | 3,309  | 830   | 25.1% | (23.6%, 26.6%) | 343     | 39  | 11.4% | (8.4%, 15.2%)  | 7,231       | 1,678  | 23.2% | (22.2%, 24.2%) |  |
|                       | <b>4</b>       | 351         | 183 | 52.1% | (46.9%, 57.3%) | 1,651      | 850   | 51.5% | (49.1%, 53.9%) | 8,165  | 3,748 | 45.9% | (44.8%, 47%)   | 626     | 187 | 29.9% | (26.4%, 33.6%) | 15,359      | 6,630  | 43.2% | (42.4%, 44%)   |  |
|                       | <b>Unknown</b> | 657         | 329 | 50.1% | (46.3%, 53.9%) | 991        | 530   | 53.5% | (50.4%, 56.6%) | 1,035  | 512   | 49.5% | (46.4%, 52.5%) | 606     | 142 | 23.4% | (20.2%, 27%)   | 11,372      | 3,671  | 32.3% | (31.4%, 33.1%) |  |



| Norway                |                 | Oesophageal |     |       |                | Stomach    |       |       |                | Colon  |       |       |                | Rectal  |     |       |                |             |        |       |                |
|-----------------------|-----------------|-------------|-----|-------|----------------|------------|-------|-------|----------------|--------|-------|-------|----------------|---------|-----|-------|----------------|-------------|--------|-------|----------------|
|                       |                 | All         | EP  | %EP   | 95% CI         | All        | EP    | %EP   | 95% CI         | All    | EP    | %EP   | 95% CI         | All     | EP  | %EP   | 95% CI         |             |        |       |                |
| <b>Total</b>          |                 | 1,332       | 435 | 32.7% | (30.2%, 35.2%) | 2,357      | 943   | 40.0% | (38.0%, 42.0%) | 14,941 | 5,354 | 35.8% | (35.1%, 36.6%) | 5,612   | 888 | 15.8% | (14.9%, 16.8%) |             |        |       |                |
| <b>Sex</b>            | <b>Male</b>     | 999         | 321 | 32.1% | (29.3%, 35.1%) | 1,489      | 579   | 38.9% | (36.4%, 41.4%) | 7,216  | 2,507 | 34.7% | (33.7%, 35.8%) | 3,323   | 515 | 15.5% | (14.3%, 16.8%) |             |        |       |                |
|                       | <b>Female</b>   | 333         | 114 | 34.2% | (29.3%, 39.5%) | 868        | 364   | 41.9% | (38.7%, 45.2%) | 7,725  | 2,847 | 36.9% | (35.8%, 37.9%) | 2,289   | 373 | 16.3% | (14.8%, 17.9%) |             |        |       |                |
| <b>Diagnosis year</b> | <b>2012</b>     | 243         | 85  | 35.0% | (29.3%, 41.2%) | 473        | 186   | 39.3% | (35%, 43.8%)   | 2,850  | 1,116 | 39.2% | (37.4%, 41.0%) | 1,056   | 185 | 17.5% | (15.3%, 19.9%) |             |        |       |                |
|                       | <b>2013</b>     | 254         | 85  | 33.5% | (27.9%, 39.5%) | 488        | 193   | 39.5% | (35.3%, 44.0%) | 2,922  | 1,040 | 35.6% | (33.9%, 37.3%) | 1,157   | 190 | 16.4% | (14.4%, 18.7%) |             |        |       |                |
|                       | <b>2014</b>     | 277         | 91  | 32.9% | (27.6%, 38.6%) | 491        | 215   | 43.8% | (39.5%, 48.2%) | 2,982  | 1,084 | 36.4% | (34.6%, 38.1%) | 1,144   | 182 | 15.9% | (13.9%, 18.1%) |             |        |       |                |
|                       | <b>2015</b>     | 284         | 96  | 33.8% | (28.5%, 39.5%) | 461        | 192   | 41.6% | (37.2%, 46.2%) | 3,097  | 1,087 | 35.1% | (33.4%, 36.8%) | 1,129   | 161 | 14.3% | (12.3%, 16.4%) |             |        |       |                |
|                       | <b>2016</b>     | 274         | 78  | 28.5% | (23.5%, 34.1%) | 444        | 157   | 35.4% | (31.1%, 39.9%) | 3,090  | 1,027 | 33.2% | (31.6%, 34.9%) | 1,126   | 170 | 15.1% | (13.1%, 17.3%) |             |        |       |                |
| <b>Age group</b>      | <b>15-64</b>    | 411         | 111 | 27.0% | (22.9%, 31.5%) | 704        | 225   | 32.0% | (28.6%, 35.5%) | 3,721  | 1,116 | 30.0% | (28.5%, 31.5%) | 1,992   | 222 | 11.1% | (9.8%, 12.6%)  |             |        |       |                |
|                       | <b>65-74</b>    | 468         | 140 | 29.9% | (25.9%, 34.2%) | 683        | 243   | 35.6% | (32.1%, 39.2%) | 4,477  | 1,378 | 30.8% | (29.4%, 32.1%) | 1,742   | 235 | 13.5% | (12.0%, 15.2%) |             |        |       |                |
|                       | <b>75-84</b>    | 313         | 111 | 35.5% | (30.4%, 40.9%) | 638        | 279   | 43.7% | (39.9%, 47.6%) | 4,576  | 1,725 | 37.7% | (36.3%, 39.1%) | 1,337   | 254 | 19.0% | (17.0%, 21.2%) |             |        |       |                |
|                       | <b>85+</b>      | 140         | 73  | 52.1% | (43.9%, 60.2%) | 332        | 196   | 59.0% | (53.7%, 64.2%) | 2,167  | 1,135 | 52.4% | (50.3%, 54.5%) | 541     | 177 | 32.7% | (28.9%, 36.8%) |             |        |       |                |
| <b>Stage</b>          | <b>Local</b>    | 203         | 48  | 23.6% | (18.3%, 29.9%) | 390        | 112   | 28.7% | (24.5%, 33.4%) | 2,726  | 467   | 17.1% | (15.8%, 18.6%) | 1,425   | 118 | 8.3%  | (7.0%, 9.8%)   |             |        |       |                |
|                       | <b>Regional</b> | 341         | 89  | 26.1% | (21.7%, 31.0%) | 615        | 216   | 35.1% | (31.5%, 39.0%) | 7,810  | 2,648 | 33.9% | (32.9%, 35.0%) | 2,623   | 364 | 13.9% | (12.6%, 15.3%) |             |        |       |                |
|                       | <b>Distant</b>  | 328         | 145 | 44.2% | (38.9%, 49.6%) | 669        | 342   | 51.1% | (47.3%, 54.9%) | 3,539  | 1,842 | 52.0% | (50.4%, 53.7%) | 962     | 262 | 27.2% | (24.5%, 30.1%) |             |        |       |                |
|                       | <b>Unknown</b>  | 460         | 153 | 33.3% | (29.1%, 37.7%) | 683        | 273   | 40.0% | (36.4%, 43.7%) | 866    | 397   | 45.8% | (42.5%, 49.2%) | 602     | 144 | 23.9% | (20.7%, 27.5%) |             |        |       |                |
|                       |                 | Liver       |     |       |                | Pancreatic |       |       |                | Lung   |       |       |                | Ovarian |     |       |                | All cancers |        |       |                |
|                       |                 | All         | EP  | %EP   | 95% CI         | All        | EP    | %EP   | 95% CI         | All    | EP    | %EP   | 95% CI         | All     | EP  | %EP   | 95% CI         | All         | EP     | %EP   | 95% CI         |
| <b>Total</b>          |                 | 1,181       | 597 | 50.6% | (47.7%, 53.4%) | 3,715      | 2,059 | 55.4% | (53.8%, 57.0%) | 14,402 | 5,679 | 39.4% | (38.6%, 40.2%) | 2,607   | 911 | 34.9% | (33.1%, 36.8%) | 46,147      | 16,866 | 36.5% | (36.1%, 37.0%) |
| <b>Sex</b>            | <b>Male</b>     | 763         | 397 | 52.0% | (48.5%, 55.6%) | 1,851      | 1,041 | 56.2% | (54.0%, 58.5%) | 7,678  | 3,050 | 39.7% | (38.6%, 40.8%) |         |     |       |                | 23,319      | 8,410  | 36.1% | (35.5%, 36.7%) |
|                       | <b>Female</b>   | 418         | 200 | 47.8% | (43.1%, 52.6%) | 1,864      | 1,018 | 54.6% | (52.3%, 56.9%) | 6,724  | 2,629 | 39.1% | (37.9%, 40.3%) | 2,607   | 911 | 34.9% | (33.1%, 36.8%) | 22,828      | 8,456  | 37.0% | (36.4%, 37.7%) |
| <b>Diagnosis year</b> | <b>2012</b>     | 209         | 114 | 54.5% | (47.8%, 61.2%) | 770        | 432   | 56.1% | (52.6%, 59.6%) | 2,855  | 1,205 | 42.2% | (40.4%, 44.0%) | 506     | 185 | 36.6% | (32.5%, 40.8%) | 8,962       | 3,508  | 39.1% | (38.1%, 40.2%) |
|                       | <b>2013</b>     | 246         | 127 | 51.6% | (45.4%, 57.8%) | 726        | 395   | 54.4% | (50.8%, 58.0%) | 2,773  | 1,139 | 41.1% | (39.3%, 42.9%) | 494     | 181 | 36.6% | (32.5%, 41.0%) | 9,060       | 3,350  | 37.0% | (36.0%, 38.0%) |
|                       | <b>2014</b>     | 221         | 122 | 55.2% | (48.6%, 61.6%) | 742        | 416   | 56.1% | (52.5%, 59.6%) | 2,906  | 1,126 | 38.7% | (37.0%, 40.5%) | 530     | 199 | 37.5% | (33.5%, 41.7%) | 9,293       | 3,435  | 37.0% | (36.0%, 37.9%) |
|                       | <b>2015</b>     | 265         | 122 | 46.0% | (40.1%, 52.1%) | 810        | 448   | 55.3% | (51.9%, 58.7%) | 2,967  | 1,165 | 39.3% | (37.5%, 41.0%) | 548     | 174 | 31.8% | (28.0%, 35.8%) | 9,561       | 3,445  | 36.0% | (35.1%, 37.0%) |
|                       | <b>2016</b>     | 240         | 112 | 46.7% | (40.5%, 53.0%) | 667        | 368   | 55.2% | (51.4%, 58.9%) | 2,901  | 1,044 | 36.0% | (34.3%, 37.8%) | 529     | 172 | 32.5% | (28.7%, 36.6%) | 9,271       | 3,128  | 33.7% | (32.8%, 34.7%) |
| <b>Age group</b>      | <b>15-64</b>    | 445         | 229 | 51.5% | (46.8%, 56.1%) | 976        | 477   | 48.9% | (45.7%, 52.0%) | 3,807  | 1,435 | 37.7% | (36.2%, 39.2%) | 1,221   | 350 | 28.7% | (26.2%, 31.3%) | 13,277      | 4,165  | 31.4% | (30.6%, 32.2%) |
|                       | <b>65-74</b>    | 321         | 151 | 47.0% | (41.6%, 52.5%) | 1,237      | 678   | 54.8% | (52.0%, 57.6%) | 5,619  | 2,088 | 37.2% | (35.9%, 38.4%) | 731     | 259 | 35.4% | (32.0%, 39.0%) | 15,278      | 5,172  | 33.9% | (33.1%, 34.6%) |
|                       | <b>75-84</b>    | 305         | 159 | 52.1% | (46.5%, 57.7%) | 983        | 556   | 56.6% | (53.4%, 59.6%) | 3,830  | 1,561 | 40.8% | (39.2%, 42.3%) | 442     | 193 | 43.7% | (39.1%, 48.3%) | 12,424      | 4,838  | 38.9% | (38.1%, 39.8%) |
|                       | <b>85+</b>      | 110         | 58  | 52.7% | (43.5%, 61.8%) | 519        | 348   | 67.1% | (62.9%, 71.0%) | 1,146  | 595   | 51.9% | (49.0%, 54.8%) | 213     | 109 | 51.2% | (44.5%, 57.8%) | 5,168       | 2,691  | 52.1% | (50.7%, 53.4%) |
| <b>Stage</b>          | <b>Local</b>    | 359         | 146 | 40.7% | (35.7%, 45.8%) | 311        | 104   | 33.4% | (28.4%, 38.9%) | 2,572  | 420   | 16.3% | (15.0%, 17.8%) | 529     | 72  | 13.6% | (10.9%, 16.8%) | 8,515       | 1,487  | 17.5% | (16.7%, 18.3%) |
|                       | <b>Regional</b> | 141         | 67  | 47.5% | (39.5%, 55.7%) | 810        | 364   | 44.9% | (41.5%, 48.4%) | 4,038  | 1,167 | 28.9% | (27.5%, 30.3%) | 82      | 27  | 32.9% | (23.7%, 43.7%) | 16,460      | 4,942  | 30.0% | (29.3%, 30.7%) |
|                       | <b>Distant</b>  | 264         | 164 | 62.1% | (56.1%, 67.8%) | 1,842      | 1,190 | 64.6% | (62.4%, 66.8%) | 6,173  | 3,446 | 55.8% | (54.6%, 57.1%) | 1,836   | 749 | 40.8% | (38.6%, 43.1%) | 15,613      | 8,140  | 52.1% | (51.4%, 52.9%) |
|                       | <b>Unknown</b>  | 417         | 220 | 52.8% | (48.0%, 57.5%) | 752        | 401   | 53.3% | (49.8%, 56.9%) | 1,619  | 646   | 39.9% | (37.5%, 42.3%) | 160     | 63  | 39.4% | (32.1%, 47.1%) | 5,559       | 2,297  | 41.3% | (40.0%, 42.6%) |

| England               |                | Oesophageal |       |       |                | Stomach    |        |       |                | Colon   |        |       |                | Rectal  |       |       |                |             |         |       |                |
|-----------------------|----------------|-------------|-------|-------|----------------|------------|--------|-------|----------------|---------|--------|-------|----------------|---------|-------|-------|----------------|-------------|---------|-------|----------------|
|                       |                | All         | EP    | %EP   | 95% CI         | All        | EP     | %EP   | 95% CI         | All     | EP     | %EP   | 95% CI         | All     | EP    | %EP   | 95% CI         |             |         |       |                |
| <b>Total</b>          |                | 27,274      | 5,364 | 19.7% | (19.2%, 20.1%) | 19,813     | 6,224  | 31.4% | (30.8%, 32.1%) | 88,219  | 25,859 | 29.3% | (29.0%, 29.6%) | 33,905  | 3,628 | 10.7% | (10.4%, 11.0%) |             |         |       |                |
| <b>Sex</b>            | <b>Male</b>    | 18,551      | 3,369 | 18.2% | (17.6%, 18.7%) | 12,877     | 3,826  | 29.7% | (28.9%, 30.5%) | 45,853  | 12,463 | 27.2% | (26.8%, 27.6%) | 21,251  | 2,057 | 9.7%  | (9.3%, 10.1%)  |             |         |       |                |
|                       | <b>Female</b>  | 8,723       | 1,995 | 22.9% | (22.0%, 23.8%) | 6,936      | 2,398  | 34.6% | (33.5%, 35.7%) | 42,366  | 13,396 | 31.6% | (31.2%, 32.1%) | 12,654  | 1,571 | 12.4% | (11.9%, 13.0%) |             |         |       |                |
| <b>Diagnosis year</b> | <b>2012</b>    | ...         | ...   | ...   | ...            | ...        | ...    | ...   | ...            | ...     | ...    | ...   | ...            | ...     | ...   | ...   | ...            |             |         |       |                |
|                       | <b>2013</b>    | 6,668       | 1,301 | 19.5% | (18.6%, 20.5%) | 5,080      | 1,694  | 33.3% | (32.1%, 34.7%) | 21,531  | 6,506  | 30.2% | (29.6%, 30.8%) | 8,363   | 907   | 10.8% | (10.2%, 11.5%) |             |         |       |                |
|                       | <b>2014</b>    | 6,676       | 1,327 | 19.9% | (18.9%, 20.9%) | 4,876      | 1,524  | 31.3% | (30.0%, 32.6%) | 21,819  | 6,435  | 29.5% | (28.9%, 30.1%) | 8,415   | 884   | 10.5% | (9.9%, 11.2%)  |             |         |       |                |
|                       | <b>2015</b>    | 6,973       | 1,353 | 19.4% | (18.5%, 20.3%) | 5,013      | 1,551  | 30.9% | (29.7%, 32.2%) | 22,472  | 6,524  | 29.0% | (28.4%, 29.6%) | 8,524   | 956   | 11.2% | (10.6%, 11.9%) |             |         |       |                |
|                       | <b>2016</b>    | 6,957       | 1,383 | 19.9% | (19.0%, 20.8%) | 4,844      | 1,455  | 30.0% | (28.8%, 31.3%) | 22,397  | 6,394  | 28.5% | (28.0%, 29.1%) | 8,603   | 881   | 10.2% | (9.6%, 10.9%)  |             |         |       |                |
| <b>Age group</b>      | <b>15-64</b>   | 7,567       | 1,075 | 14.2% | (13.4%, 15.0%) | 4,712      | 1,213  | 25.7% | (24.5%, 27.0%) | 23,531  | 6,678  | 28.4% | (27.8%, 29.0%) | 11,769  | 819   | 7.0%  | (6.5%, 7.4%)   |             |         |       |                |
|                       | <b>65-74</b>   | 8,663       | 1,312 | 15.1% | (14.4%, 15.9%) | 5,070      | 1,203  | 23.7% | (22.6%, 24.9%) | 24,057  | 5,146  | 21.4% | (20.9%, 21.9%) | 10,103  | 793   | 7.8%  | (7.3%, 8.4%)   |             |         |       |                |
|                       | <b>75-84</b>   | 7,369       | 1,588 | 21.5% | (20.6%, 22.5%) | 6,689      | 2,155  | 32.2% | (31.1%, 33.3%) | 26,651  | 7,706  | 28.9% | (28.4%, 29.5%) | 8,428   | 1,066 | 12.6% | (12%, 13.4%)   |             |         |       |                |
|                       | <b>85+</b>     | 3,675       | 1,389 | 37.8% | (36.2%, 39.4%) | 3,342      | 1,653  | 49.5% | (47.8%, 51.2%) | 13,980  | 6,329  | 45.3% | (44.4%, 46.1%) | 3,605   | 950   | 26.4% | (24.9%, 27.8%) |             |         |       |                |
| <b>Stage</b>          | <b>1</b>       | 2,550       | 237   | 9.3%  | (8.2%, 10.5%)  | 1,763      | 281    | 15.9% | (14.3%, 17.7%) | 11,397  | 1,093  | 9.6%  | (9.1%, 10.1%)  | 7,396   | 273   | 3.7%  | (3.3%, 4.1%)   |             |         |       |                |
|                       | <b>2</b>       | 3,396       | 429   | 12.6% | (11.6%, 13.8%) | 2,666      | 612    | 23.0% | (21.4%, 24.6%) | 22,408  | 5,289  | 23.6% | (23.1%, 24.2%) | 5,753   | 494   | 8.6%  | (7.9%, 9.3%)   |             |         |       |                |
|                       | <b>3</b>       | 8,038       | 1,048 | 13.0% | (12.3%, 13.8%) | 3,257      | 665    | 20.4% | (19.1%, 21.8%) | 21,088  | 5,424  | 25.7% | (25.1%, 26.3%) | 11,091  | 756   | 6.8%  | (6.4%, 7.3%)   |             |         |       |                |
|                       | <b>4</b>       | 8,111       | 2,044 | 25.2% | (24.3%, 26.2%) | 7,236      | 2,792  | 38.6% | (37.5%, 39.7%) | 22,492  | 9,314  | 41.4% | (40.8%, 42.1%) | 6,241   | 1,313 | 21.0% | (20%, 22.1%)   |             |         |       |                |
|                       | <b>Unknown</b> | 5,179       | 1,606 | 31.0% | (29.8%, 32.3%) | 4,891      | 1,874  | 38.3% | (37.0%, 39.7%) | 10,834  | 4,739  | 43.7% | (42.8%, 44.7%) | 3,424   | 792   | 23.1% | (21.7%, 24.6%) |             |         |       |                |
|                       |                | Liver       |       |       |                | Pancreatic |        |       |                | Lung    |        |       |                | Ovarian |       |       |                | All cancers |         |       |                |
|                       |                | All         | EP    | %EP   | 95% CI         | All        | EP     | %EP   | 95% CI         | All     | EP     | %EP   | 95% CI         | All     | EP    | %EP   | 95% CI         | All         | EP      | %EP   | 95% CI         |
| <b>Total</b>          |                | 17,699      | 7,497 | 42.4% | (41.6%, 43.1%) | 30,442     | 14,291 | 46.9% | (46.4%, 47.5%) | 135,396 | 46,951 | 34.7% | (34.4%, 34.9%) | 20,446  | 7,120 | 34.8% | (34.2%, 35.5%) | 373,194     | 116,934 | 31.3% | (31.2%, 31.5%) |
| <b>Sex</b>            | <b>Male</b>    | 11,409      | 4,482 | 39.3% | (38.4%, 40.2%) | 15,243     | 6,988  | 45.8% | (45.1%, 46.6%) | 71,819  | 24,654 | 34.3% | (34.0%, 34.7%) |         |       |       |                | 197,003     | 57,839  | 29.4% | (29.2%, 29.6%) |
|                       | <b>Female</b>  | 6,290       | 3,015 | 47.9% | (46.7%, 49.2%) | 15,199     | 7,303  | 48.0% | (47.3%, 48.8%) | 63,577  | 22,297 | 35.1% | (34.7%, 35.4%) | 20,446  | 7,120 | 34.8% | (34.2%, 35.5%) | 176,191     | 59,095  | 33.5% | (33.3%, 33.8%) |
| <b>Diagnosis year</b> | <b>2012</b>    | ...         | ...   | ...   | ...            | ...        | ...    | ...   | ...            | ...     | ...    | ...   | ...            | ...     | ...   | ...   | ...            | ...         | ...     | ...   | ...            |
|                       | <b>2013</b>    | 4,155       | 1,830 | 44.0% | (42.5%, 45.6%) | 7,235      | 3,426  | 47.4% | (46.2%, 48.5%) | 32,950  | 11,842 | 35.9% | (35.4%, 36.5%) | 5,011   | 1,765 | 35.2% | (33.9%, 36.6%) | 90,993      | 29,271  | 32.2% | (31.9%, 32.5%) |
|                       | <b>2014</b>    | 4,377       | 1,865 | 42.6% | (41.2%, 44.1%) | 7,504      | 3,543  | 47.2% | (46.1%, 48.3%) | 33,800  | 11,948 | 35.3% | (34.8%, 35.9%) | 5,142   | 1,789 | 34.8% | (33.5%, 36.1%) | 92,609      | 29,315  | 31.7% | (31.4%, 32.0%) |
|                       | <b>2015</b>    | 4,500       | 1,894 | 42.1% | (40.7%, 43.5%) | 7,789      | 3,664  | 47.0% | (45.9%, 48.2%) | 33,968  | 11,586 | 34.1% | (33.6%, 34.6%) | 5,057   | 1,769 | 35.0% | (33.7%, 36.3%) | 94,296      | 29,297  | 31.1% | (30.8%, 31.4%) |
|                       | <b>2016</b>    | 4,667       | 1,908 | 40.9% | (39.5%, 42.3%) | 7,914      | 3,658  | 46.2% | (45.1%, 47.3%) | 34,678  | 11,575 | 33.4% | (32.9%, 33.9%) | 5,236   | 1,797 | 34.3% | (33.0%, 35.6%) | 95,296      | 29,051  | 30.5% | (30.2%, 30.8%) |
| <b>Age group</b>      | <b>15-64</b>   | 4,909       | 1,646 | 33.5% | (32.2%, 34.9%) | 7,282      | 2,709  | 37.2% | (36.1%, 38.3%) | 30,543  | 8,521  | 27.9% | (27.4%, 28.4%) | 8,106   | 2,133 | 26.3% | (25.4%, 27.3%) | 98,419      | 24,794  | 25.2% | (24.9%, 25.5%) |
|                       | <b>65-74</b>   | 5,138       | 1,911 | 37.2% | (35.9%, 38.5%) | 8,964      | 3,627  | 40.5% | (39.5%, 41.5%) | 45,107  | 13,237 | 29.3% | (28.9%, 29.8%) | 5,868   | 1,963 | 33.5% | (32.3%, 34.7%) | 112,970     | 29,192  | 25.8% | (25.6%, 26.1%) |
|                       | <b>75-84</b>   | 5,234       | 2,415 | 46.1% | (44.8%, 47.5%) | 9,429      | 4,815  | 51.1% | (50.1%, 52.1%) | 42,119  | 15,838 | 37.6% | (37.1%, 38.1%) | 4,602   | 1,969 | 42.8% | (41.4%, 44.2%) | 110,521     | 37,552  | 34.0% | (33.7%, 34.3%) |
|                       | <b>85+</b>     | 2,418       | 1,525 | 63.1% | (61.1%, 65.0%) | 4,767      | 3,140  | 65.9% | (64.5%, 67.2%) | 17,627  | 9,355  | 53.1% | (52.3%, 53.8%) | 1,870   | 1,055 | 56.4% | (54.2%, 58.6%) | 51,284      | 25,396  | 49.5% | (49.1%, 50.0%) |
| <b>Stage</b>          | <b>1</b>       | 911         | 196   | 21.5% | (19.0%, 24.3%) | 1,464      | 620    | 42.3% | (39.8%, 44.9%) | 19,368  | 2,941  | 15.2% | (14.7%, 15.7%) | 3,596   | 384   | 10.7% | (9.7%, 11.7%)  | 48,445      | 6,025   | 12.4% | (12.1%, 12.7%) |
|                       | <b>2</b>       | 1,092       | 235   | 21.5% | (19.2%, 24.1%) | 3,168      | 1,085  | 34.2% | (32.6%, 35.9%) | 9,742   | 1,647  | 16.9% | (16.2%, 17.7%) | 1,150   | 137   | 11.9% | (10.2%, 13.9%) | 49,375      | 9,928   | 20.1% | (19.8%, 20.5%) |
|                       | <b>3</b>       | 1,014       | 358   | 35.3% | (32.4%, 38.3%) | 2,382      | 816    | 34.3% | (32.4%, 36.2%) | 26,334  | 5,719  | 21.7% | (21.2%, 22.2%) | 7,649   | 2,646 | 34.6% | (33.5%, 35.7%) | 80,853      | 17,432  | 21.6% | (21.3%, 21.8%) |
|                       | <b>4</b>       | 4,484       | 2,198 | 49.0% | (47.6%, 50.5%) | 15,059     | 7,590  | 50.4% | (49.6%, 51.2%) | 68,141  | 30,926 | 45.4% | (45.0%, 45.8%) | 4,618   | 2,348 | 50.8% | (49.4%, 52.3%) | 136,382     | 58,525  | 42.9% | (42.7%, 43.2%) |
|                       | <b>Unknown</b> | 10,198      | 4,510 | 44.2% | (43.3%, 45.2%) | 8,369      | 4,180  | 49.9% | (48.9%, 51.0%) | 11,811  | 5,718  | 48.4% | (47.5%, 49.3%) | 3,433   | 1,605 | 46.8% | (45.1%, 48.4%) | 58,139      | 25,024  | 43.0% | (42.6%, 43.4%) |

| Northern Ireland      |                | Oesophageal |     |       |                | Stomach    |     |       |                | Colon |       |       |                | Rectal  |     |       |                |             |       |       |                |
|-----------------------|----------------|-------------|-----|-------|----------------|------------|-----|-------|----------------|-------|-------|-------|----------------|---------|-----|-------|----------------|-------------|-------|-------|----------------|
|                       |                | All         | EP  | %EP   | 95% CI         | All        | EP  | %EP   | 95% CI         | All   | EP    | %EP   | 95% CI         | All     | EP  | %EP   | 95% CI         |             |       |       |                |
| <b>Total</b>          |                | 972         | 193 | 19.9% | (17.5%, 22.5%) | 990        | 293 | 29.6% | (26.8%, 32.5%) | 3,846 | 914   | 23.8% | (22.4%, 25.1%) | 1,376   | 125 | 9.1%  | (7.7%, 10.7%)  |             |       |       |                |
| <b>Sex</b>            | <b>Male</b>    | 660         | 116 | 17.6% | (14.9%, 20.7%) | 620        | 170 | 27.4% | (24.1%, 31.1%) | 2,026 | 427   | 21.1% | (19.4%, 22.9%) | 851     | 62  | 7.3%  | (5.7%, 9.2%)   |             |       |       |                |
|                       | <b>Female</b>  | 312         | 77  | 24.7% | (20.2%, 29.8%) | 370        | 123 | 33.2% | (28.6%, 38.2%) | 1,820 | 487   | 26.8% | (24.8%, 28.8%) | 525     | 63  | 12.0% | (9.5%, 15.1%)  |             |       |       |                |
| <b>Diagnosis year</b> | <b>2012</b>    | 196         | 43  | 21.9% | (16.7%, 28.2%) | 180        | 65  | 36.1% | (29.5%, 43.4%) | 782   | 193   | 24.7% | (21.8%, 27.8%) | 315     | 25  | 7.9%  | (5.4%, 11.5%)  |             |       |       |                |
|                       | <b>2013</b>    | 184         | 38  | 20.7% | (15.4%, 27.1%) | 212        | 57  | 26.9% | (21.4%, 33.2%) | 823   | 198   | 24.1% | (21.3%, 27.1%) | 278     | 28  | 10.1% | (7.1%, 14.2%)  |             |       |       |                |
|                       | <b>2014</b>    | 199         | 40  | 20.1% | (15.1%, 26.2%) | 205        | 57  | 27.8% | (22.1%, 34.3%) | 766   | 169   | 22.1% | (19.3%, 25.1%) | 251     | 26  | 10.4% | (7.2%, 14.7%)  |             |       |       |                |
|                       | <b>2015</b>    | 186         | 38  | 20.4% | (15.3%, 26.8%) | 185        | 55  | 29.7% | (23.6%, 36.7%) | 724   | 162   | 22.4% | (19.5%, 25.6%) | 269     | 19  | 7.1%  | (4.6%, 10.8%)  |             |       |       |                |
|                       | <b>2016</b>    | 207         | 34  | 16.4% | (12.0%, 22.1%) | 208        | 59  | 28.4% | (22.7%, 34.8%) | 751   | 192   | 25.6% | (22.6%, 28.8%) | 263     | 27  | 10.3% | (7.2%, 14.5%)  |             |       |       |                |
| <b>Age group</b>      | <b>15-64</b>   | 335         | 48  | 14.3% | (11.0%, 18.5%) | 263        | 77  | 29.3% | (24.1%, 35.0%) | 1,085 | 260   | 24.0% | (21.5%, 26.6%) | 522     | 29  | 5.6%  | (3.9%, 7.9%)   |             |       |       |                |
|                       | <b>65-74</b>   | 303         | 49  | 16.2% | (12.5%, 20.7%) | 267        | 61  | 22.9% | (18.2%, 28.2%) | 1,156 | 209   | 18.1% | (16.0%, 20.4%) | 420     | 24  | 5.7%  | (3.9%, 8.4%)   |             |       |       |                |
|                       | <b>75-84</b>   | 221         | 55  | 24.9% | (19.6%, 31.0%) | 317        | 104 | 32.8% | (27.9%, 38.2%) | 1,122 | 259   | 23.1% | (20.7%, 25.6%) | 319     | 37  | 11.6% | (8.5%, 15.6%)  |             |       |       |                |
|                       | <b>85+</b>     | 113         | 41  | 36.3% | (28.0%, 45.5%) | 143        | 51  | 35.7% | (28.3%, 43.8%) | 483   | 186   | 38.5% | (34.3%, 42.9%) | 115     | 35  | 30.4% | (22.8%, 39.4%) |             |       |       |                |
| <b>Stage</b>          | <b>1</b>       | 81          | 3   | 3.7%  | (1.3%, 10.3%)  | 96         | 4   | 4.2%  | (1.6%, 10.2%)  | 601   | 27    | 4.5%  | (3.1%, 6.5%)   | 297     | 13  | 4.4%  | (2.6%, 7.3%)   |             |       |       |                |
|                       | <b>2</b>       | 121         | 12  | 9.9%  | (5.8%, 16.5%)  | 74         | 14  | 18.9% | (11.6%, 29.3%) | 1,083 | 189   | 17.5% | (15.3%, 19.8%) | 268     | 7   | 2.6%  | (1.3%, 5.3%)   |             |       |       |                |
|                       | <b>3</b>       | 183         | 28  | 15.3% | (10.8%, 21.2%) | 117        | 22  | 18.8% | (12.8%, 26.8%) | 896   | 199   | 22.2% | (19.6%, 25.0%) | 508     | 35  | 6.9%  | (5.0%, 9.4%)   |             |       |       |                |
|                       | <b>4</b>       | 298         | 72  | 24.2% | (19.6%, 29.3%) | 385        | 149 | 38.7% | (34.0%, 43.7%) | 874   | 352   | 40.3% | (37.1%, 43.6%) | 217     | 45  | 20.7% | (15.9%, 26.6%) |             |       |       |                |
|                       | <b>Unknown</b> | 289         | 78  | 27.0% | (22.2%, 32.4%) | 318        | 104 | 32.7% | (27.8%, 38.0%) | 392   | 147   | 37.5% | (32.9%, 42.4%) | 86      | 25  | 29.1% | (20.5%, 39.4%) |             |       |       |                |
|                       |                | Liver       |     |       |                | Pancreatic |     |       |                | Lung  |       |       |                | Ovarian |     |       |                | All cancers |       |       |                |
|                       |                | All         | EP  | %EP   | 95% CI         | All        | EP  | %EP   | 95% CI         | All   | EP    | %EP   | 95% CI         | All     | EP  | %EP   | 95% CI         | All         | EP    | %EP   | 95% CI         |
| <b>Total</b>          |                | 582         | 215 | 36.9% | (33.1%, 40.9%) | 1,162      | 496 | 42.7% | (39.9%, 45.5%) | 5,752 | 1,843 | 32.0% | (30.8%, 33.3%) | 821     | 243 | 29.6% | (26.6%, 32.8%) | 15,501      | 4,322 | 27.9% | (27.2%, 28.6%) |
| <b>Sex</b>            | <b>Male</b>    | 384         | 142 | 37.0% | (32.3%, 41.9%) | 572        | 242 | 42.3% | (38.3%, 46.4%) | 3,021 | 965   | 31.9% | (30.3%, 33.6%) |         |     |       |                | 8,134       | 2,124 | 26.1% | (25.2%, 27.1%) |
|                       | <b>Female</b>  | 198         | 73  | 36.9% | (30.5%, 43.8%) | 590        | 254 | 43.1% | (39.1%, 47.1%) | 2,731 | 878   | 32.1% | (30.4%, 33.9%) | 821     | 243 | 29.6% | (26.6%, 32.8%) | 7,367       | 2,198 | 29.8% | (28.8%, 30.9%) |
| <b>Diagnosis year</b> | <b>2012</b>    | 98          | 43  | 43.9% | (34.5%, 53.7%) | 230        | 109 | 47.4% | (41.0%, 53.8%) | 1,099 | 374   | 34.0% | (31.3%, 36.9%) | 171     | 57  | 33.3% | (26.7%, 40.7%) | 3,071       | 909   | 29.6% | (28.0%, 31.2%) |
|                       | <b>2013</b>    | 116         | 52  | 44.8% | (36.1%, 53.9%) | 222        | 93  | 41.9% | (35.6%, 48.5%) | 1,121 | 354   | 31.6% | (28.9%, 34.4%) | 169     | 47  | 27.8% | (21.6%, 35.0%) | 3,125       | 867   | 27.7% | (26.2%, 29.3%) |
|                       | <b>2014</b>    | 120         | 40  | 33.3% | (25.5%, 42.2%) | 222        | 99  | 44.6% | (38.2%, 51.2%) | 1,124 | 364   | 32.4% | (29.7%, 35.2%) | 164     | 61  | 37.2% | (30.2%, 44.8%) | 3,051       | 856   | 28.1% | (26.5%, 29.7%) |
|                       | <b>2015</b>    | 132         | 47  | 35.6% | (28.0%, 44.1%) | 258        | 108 | 41.9% | (36.0%, 48.0%) | 1,158 | 363   | 31.3% | (28.7%, 34.1%) | 160     | 43  | 26.9% | (20.6%, 34.2%) | 3,072       | 835   | 27.2% | (25.6%, 28.8%) |
|                       | <b>2016</b>    | 116         | 33  | 28.4% | (21.0%, 37.2%) | 230        | 87  | 37.8% | (31.8%, 44.2%) | 1,250 | 388   | 31.0% | (28.5%, 33.7%) | 157     | 35  | 22.3% | (16.5%, 29.4%) | 3,182       | 855   | 26.9% | (25.4%, 28.4%) |
| <b>Age group</b>      | <b>15-64</b>   | 149         | 51  | 34.2% | (27.1%, 42.2%) | 278        | 98  | 35.3% | (29.9%, 41.0%) | 1,466 | 373   | 25.4% | (23.3%, 27.7%) | 334     | 67  | 20.1% | (16.1%, 24.7%) | 4,432       | 1,003 | 22.6% | (21.4%, 23.9%) |
|                       | <b>65-74</b>   | 181         | 47  | 26.0% | (20.1%, 32.8%) | 389        | 145 | 37.3% | (32.6%, 42.2%) | 2,022 | 611   | 30.2% | (28.3%, 32.3%) | 227     | 74  | 32.6% | (26.8%, 38.9%) | 4,965       | 1,220 | 24.6% | (23.4%, 25.8%) |
|                       | <b>75-84</b>   | 184         | 78  | 42.4% | (35.5%, 49.6%) | 339        | 150 | 44.2% | (39.1%, 49.6%) | 1,724 | 603   | 35.0% | (32.8%, 37.3%) | 182     | 65  | 35.7% | (29.1%, 42.9%) | 4,408       | 1,351 | 30.6% | (29.3%, 32.0%) |
|                       | <b>85+</b>     | 68          | 39  | 57.4% | (45.5%, 68.4%) | 156        | 103 | 66.0% | (58.3%, 73.0%) | 540   | 256   | 47.4% | (43.2%, 51.6%) | 78      | 37  | 47.4% | (36.7%, 58.4%) | 1,696       | 748   | 44.1% | (41.8%, 46.5%) |
| <b>Stage</b>          | <b>1</b>       | 69          | 6   | 8.7%  | (4.0%, 17.7%)  | 53         | 12  | 22.6% | (13.5%, 35.5%) | 860   | 87    | 10.1% | (8.3%, 12.3%)  | 164     | 20  | 12.2% | (8.0%, 18.1%)  | 2,221       | 172   | 7.7%  | (6.7%, 8.9%)   |
|                       | <b>2</b>       | 59          | 8   | 13.6% | (7.0%, 24.5%)  | 131        | 18  | 13.7% | (8.9%, 20.7%)  | 437   | 44    | 10.1% | (7.6%, 13.2%)  | 61      | 3   | 4.9%  | (1.7%, 13.5%)  | 2,234       | 295   | 13.2% | (11.9%, 14.7%) |
|                       | <b>3</b>       | 58          | 21  | 36.2% | (25.1%, 49.1%) | 133        | 34  | 25.6% | (18.9%, 33.6%) | 1,320 | 281   | 21.3% | (19.2%, 23.6%) | 369     | 114 | 30.9% | (26.4%, 35.8%) | 3,584       | 734   | 20.5% | (19.2%, 21.8%) |
|                       | <b>4</b>       | 128         | 56  | 43.8% | (35.5%, 52.4%) | 562        | 273 | 48.6% | (44.5%, 52.7%) | 2,594 | 1,171 | 45.1% | (43.2%, 47.1%) | 126     | 57  | 45.2% | (36.8%, 53.9%) | 5,184       | 2,175 | 42.0% | (40.6%, 43.3%) |
|                       | <b>Unknown</b> | 268         | 124 | 46.3% | (40.4%, 52.2%) | 283        | 159 | 56.2% | (50.4%, 61.8%) | 541   | 260   | 48.1% | (43.9%, 52.3%) | 101     | 49  | 48.5% | (39.0%, 58.1%) | 2,278       | 946   | 41.5% | (39.5%, 43.6%) |

| Scotland              |                | Oesophageal |       |       |                | Stomach    |       |       |                | Colon  |       |       |                | Rectal  |     |       |                |             |        |       |                |
|-----------------------|----------------|-------------|-------|-------|----------------|------------|-------|-------|----------------|--------|-------|-------|----------------|---------|-----|-------|----------------|-------------|--------|-------|----------------|
|                       |                | All         | EP    | %EP   | 95% CI         | All        | EP    | %EP   | 95% CI         | All    | EP    | %EP   | 95% CI         | All     | EP  | %EP   | 95% CI         |             |        |       |                |
| <b>Total</b>          |                | 3,378       | 851   | 25.2% | (23.8%, 26.7%) | 2,337      | 913   | 39.1% | (37.1%, 41.1%) | 9,600  | 3366  | 35.1% | (34.1%, 36.0%) | 3,535   | 499 | 14.1% | (13.0%, 15.3%) |             |        |       |                |
| <b>Sex</b>            | <b>Male</b>    | 2,231       | 545   | 24.4% | (22.7%, 26.3%) | 1,463      | 557   | 38.1% | (35.6%, 40.6%) | 4,890  | 1655  | 33.8% | (32.5%, 35.2%) | 2,196   | 290 | 13.2% | (11.9%, 14.7%) |             |        |       |                |
|                       | <b>Female</b>  | 1,147       | 306   | 26.7% | (24.2%, 29.3%) | 874        | 356   | 40.7% | (37.5%, 44.0%) | 4,710  | 1711  | 36.3% | (35.0%, 37.7%) | 1,339   | 209 | 15.6% | (13.8%, 17.7%) |             |        |       |                |
| <b>Diagnosis year</b> | <b>2014</b>    | 854         | 222   | 26.0% | (23.2%, 29.0%) | 622        | 248   | 39.9% | (36.1%, 43.8%) | 2,444  | 868   | 35.5% | (33.6%, 37.4%) | 876     | 126 | 14.4% | (12.2%, 16.9%) |             |        |       |                |
|                       | <b>2015</b>    | 856         | 214   | 25.0% | (22.2%, 28.0%) | 564        | 219   | 38.8% | (34.9%, 42.9%) | 2,409  | 853   | 35.4% | (33.5%, 37.3%) | 838     | 121 | 14.4% | (12.2%, 17.0%) |             |        |       |                |
|                       | <b>2016</b>    | 787         | 193   | 24.5% | (21.6%, 27.6%) | 576        | 223   | 38.7% | (34.8%, 42.8%) | 2,365  | 813   | 34.4% | (32.5%, 36.3%) | 914     | 127 | 13.9% | (11.8%, 16.3%) |             |        |       |                |
|                       | <b>2017</b>    | 881         | 222   | 25.2% | (22.4%, 28.2%) | 575        | 223   | 38.8% | (34.9%, 42.8%) | 2,382  | 832   | 34.9% | (33.0%, 36.9%) | 907     | 125 | 13.8% | (11.7%, 16.2%) |             |        |       |                |
| <b>Age group</b>      | <b>15-64</b>   | 935         | 186   | 19.9% | (17.5%, 22.6%) | 626        | 205   | 32.7% | (29.2%, 36.5%) | 2,568  | 822   | 32.0% | (30.2%, 33.8%) | 1,311   | 133 | 10.1% | (8.6%, 11.9%)  |             |        |       |                |
|                       | <b>65-74</b>   | 1,087       | 229   | 21.1% | (18.7%, 23.6%) | 560        | 164   | 29.3% | (25.7%, 33.2%) | 2,782  | 740   | 26.6% | (25.0%, 28.3%) | 1,072   | 123 | 11.5% | (9.7%, 13.5%)  |             |        |       |                |
|                       | <b>75-84</b>   | 942         | 254   | 27.0% | (24.2%, 29.9%) | 814        | 338   | 41.5% | (38.2%, 44.9%) | 2,904  | 1068  | 36.8% | (35.0%, 38.5%) | 844     | 152 | 18.0% | (15.6%, 20.7%) |             |        |       |                |
|                       | <b>85+</b>     | 414         | 182   | 44.0% | (39.3%, 48.8%) | 337        | 206   | 61.1% | (55.8%, 66.2%) | 1,346  | 736   | 54.7% | (52.0%, 57.3%) | 308     | 91  | 29.5% | (24.7%, 34.9%) |             |        |       |                |
| <b>Stage</b>          | <b>1</b>       | 270         | 29    | 10.7% | (7.6%, 15.0%)  | 149        | 37    | 24.8% | (18.6%, 32.3%) | 1,017  | 106   | 10.4% | (8.7%, 12.5%)  | 766     | 39  | 5.1%  | (3.7%, 6.9%)   |             |        |       |                |
|                       | <b>2</b>       | 317         | 54    | 17.0% | (13.3%, 21.6%) | 283        | 98    | 34.6% | (29.3%, 40.3%) | 2,532  | 703   | 27.8% | (26.1%, 29.5%) | 742     | 72  | 9.7%  | (7.8%, 12.0%)  |             |        |       |                |
|                       | <b>3</b>       | 909         | 172   | 18.9% | (16.5%, 21.6%) | 227        | 41    | 18.1% | (13.6%, 23.6%) | 2,270  | 698   | 30.7% | (28.9%, 32.7%) | 876     | 84  | 9.6%  | (7.8%, 11.7%)  |             |        |       |                |
|                       | <b>4</b>       | 1,112       | 342   | 30.8% | (28.1%, 33.5%) | 990        | 429   | 43.3% | (40.3%, 46.4%) | 2,345  | 1142  | 48.7% | (46.7%, 50.7%) | 628     | 164 | 26.1% | (22.8%, 29.7%) |             |        |       |                |
|                       | <b>Unknown</b> | 770         | 254   | 33.0% | (29.8%, 36.4%) | 688        | 308   | 44.8% | (41.1%, 48.5%) | 1,436  | 717   | 49.9% | (47.3%, 52.5%) | 523     | 140 | 26.8% | (23.2%, 30.7%) |             |        |       |                |
|                       |                | Liver       |       |       |                | Pancreatic |       |       |                | Lung   |       |       |                | Ovarian |     |       |                | All cancers |        |       |                |
|                       |                | All         | EP    | %EP   | 95% CI         | All        | EP    | %EP   | 95% CI         | All    | EP    | %EP   | 95% CI         | All     | EP  | %EP   | 95% CI         | All         | EP     | %EP   | 95% CI         |
| <b>Total</b>          |                | 2,340       | 1,111 | 47.5% | (45.5%, 49.5%) | 3,054      | 1,809 | 59.2% | (57.5%, 61.0%) | 18,662 | 7,863 | 42.1% | (41.4%, 42.8%) | 2,123   | 909 | 42.8% | (40.7%, 44.9%) | 45,029      | 17,321 | 38.5% | (38%, 38.9%)   |
| <b>Sex</b>            | <b>Male</b>    | 1,573       | 691   | 43.9% | (41.5%, 46.4%) | 1,500      | 891   | 59.4% | (56.9%, 61.9%) | 9,189  | 3,877 | 42.2% | (41.2%, 43.2%) |         |     |       |                | 23,042      | 8,506  | 36.9% | (36.3%, 37.5%) |
|                       | <b>Female</b>  | 767         | 420   | 54.8% | (51.2%, 58.2%) | 1,554      | 918   | 59.1% | (56.6%, 61.5%) | 9,473  | 3,986 | 42.1% | (41.1%, 43.1%) | 2,123   | 909 | 42.8% | (40.7%, 44.9%) | 21,987      | 8,815  | 40.1% | (39.4%, 40.7%) |
| <b>Diagnosis year</b> | <b>2014</b>    | 574         | 265   | 46.2% | (42.1%, 50.3%) | 766        | 475   | 62.0% | (58.5%, 65.4%) | 4,901  | 2,076 | 42.4% | (41.0%, 43.7%) | 562     | 231 | 41.1% | (37.1%, 45.2%) | 11,599      | 4,511  | 38.9% | (38.0%, 39.8%) |
|                       | <b>2015</b>    | 599         | 286   | 47.7% | (43.8%, 51.7%) | 768        | 468   | 60.9% | (57.4%, 64.3%) | 4,531  | 1,936 | 42.7% | (41.3%, 44.2%) | 526     | 249 | 47.3% | (43.1%, 51.6%) | 11,091      | 4,346  | 39.2% | (38.3%, 40.1%) |
|                       | <b>2016</b>    | 597         | 295   | 49.4% | (45.4%, 53.4%) | 766        | 430   | 56.1% | (52.6%, 59.6%) | 4,517  | 1,922 | 42.6% | (41.1%, 44.0%) | 542     | 233 | 43.0% | (38.9%, 47.2%) | 11,064      | 4,236  | 38.3% | (37.4%, 39.2%) |
|                       | <b>2017</b>    | 570         | 265   | 46.5% | (42.4%, 50.6%) | 754        | 436   | 57.8% | (54.3%, 61.3%) | 4,713  | 1,929 | 40.9% | (39.5%, 42.3%) | 493     | 196 | 39.8% | (35.5%, 44.1%) | 11,275      | 4,228  | 37.5% | (36.6%, 38.4%) |
| <b>Age group</b>      | <b>15-64</b>   | 679         | 266   | 39.2% | (35.6%, 42.9%) | 756        | 423   | 56.0% | (52.4%, 59.5%) | 4,319  | 1,573 | 36.4% | (35.0%, 37.9%) | 830     | 312 | 37.6% | (34.4%, 40.9%) | 12,024      | 3,920  | 32.6% | (31.8%, 33.4%) |
|                       | <b>65-74</b>   | 736         | 324   | 44.0% | (40.5%, 47.6%) | 977        | 532   | 54.5% | (51.3%, 57.6%) | 6,461  | 2,486 | 38.5% | (37.3%, 39.7%) | 558     | 219 | 39.2% | (35.3%, 43.4%) | 14,233      | 4,817  | 33.8% | (33.1%, 34.6%) |
|                       | <b>75-84</b>   | 655         | 328   | 50.1% | (46.3%, 53.9%) | 912        | 550   | 60.3% | (57.1%, 63.4%) | 5,818  | 2,640 | 45.4% | (44.1%, 46.7%) | 510     | 250 | 49.0% | (44.7%, 53.3%) | 13,399      | 5,580  | 41.6% | (40.8%, 42.5%) |
|                       | <b>85+</b>     | 270         | 193   | 71.5% | (65.8%, 76.5%) | 409        | 304   | 74.3% | (69.9%, 78.3%) | 2,064  | 1,164 | 56.4% | (54.2%, 58.5%) | 225     | 128 | 56.9% | (50.4%, 63.2%) | 5,373       | 3,004  | 55.9% | (54.6%, 57.2%) |
| <b>Stage</b>          | <b>1</b>       | 232         | 53    | 22.8% | (17.9%, 28.7%) | 207        | 119   | 57.5% | (50.7%, 64.0%) | 2,781  | 706   | 25.4% | (23.8%, 27.0%) | 436     | 127 | 29.1% | (25.1%, 33.6%) | 5,858       | 1,216  | 20.8% | (19.7%, 21.8%) |
|                       | <b>2</b>       | 290         | 84    | 29.0% | (24.0%, 34.4%) | 300        | 172   | 57.3% | (51.7%, 62.8%) | 1,249  | 312   | 25.0% | (22.7%, 27.5%) | 144     | 39  | 27.1% | (20.5%, 34.9%) | 5,857       | 1,534  | 26.2% | (25.1%, 27.3%) |
|                       | <b>3</b>       | 133         | 58    | 43.6% | (35.5%, 52.1%) | 278        | 137   | 49.3% | (43.5%, 55.1%) | 3,809  | 1,276 | 33.5% | (32.0%, 35.0%) | 678     | 270 | 39.8% | (36.2%, 43.6%) | 9,180       | 2,736  | 29.8% | (28.9%, 30.7%) |
|                       | <b>4</b>       | 669         | 403   | 60.2% | (56.5%, 63.9%) | 1,676      | 1,000 | 59.7% | (57.3%, 62.0%) | 9,245  | 4,792 | 51.8% | (50.8%, 52.9%) | 585     | 313 | 53.5% | (49.5%, 57.5%) | 17,250      | 8,585  | 49.8% | (49.0%, 50.5%) |
|                       | <b>Unknown</b> | 1,016       | 513   | 50.5% | (47.4%, 53.6%) | 593        | 381   | 64.2% | (60.3%, 68.0%) | 1,578  | 777   | 49.2% | (46.8%, 51.7%) | 280     | 160 | 57.1% | (51.3%, 62.8%) | 6,884       | 3,250  | 47.2% | (46.0%, 48.4%) |

| Wales                 |                | Oesophageal |     |       |                | Stomach    |       |       |                | Colon |       |       |                | Rectal  |     |       |                |             |       |       |                |
|-----------------------|----------------|-------------|-----|-------|----------------|------------|-------|-------|----------------|-------|-------|-------|----------------|---------|-----|-------|----------------|-------------|-------|-------|----------------|
|                       |                | All         | EP  | %EP   | 95% CI         | All        | EP    | %EP   | 95% CI         | All   | EP    | %EP   | 95% CI         | All     | EP  | %EP   | 95% CI         |             |       |       |                |
| <b>Total</b>          |                | 1,703       | 435 | 25.5% | (23.5%, 27.7%) | 1,656      | 648   | 39.1% | (36.8%, 41.5%) | 6,142 | 2,102 | 34.2% | (33.0%, 35.4%) | 2,577   | 355 | 13.8% | (12.5%, 15.2%) |             |       |       |                |
| <b>Sex</b>            | <b>Male</b>    | 1,128       | 273 | 24.2% | (21.8%, 26.8%) | 1,131      | 423   | 37.4% | (34.6%, 40.3%) | 3,349 | 1,103 | 32.9% | (31.4%, 34.5%) | 1,658   | 221 | 13.3% | (11.8%, 15.1%) |             |       |       |                |
|                       | <b>Female</b>  | 575         | 162 | 28.2% | (24.7%, 32.0%) | 525        | 225   | 42.9% | (38.7%, 47.1%) | 2,793 | 999   | 35.8% | (34.0%, 37.6%) | 919     | 134 | 14.6% | (12.4%, 17.0%) |             |       |       |                |
| <b>Diagnosis year</b> | <b>2012</b>    | ...         | ... | ...   | ...            | ...        | ...   | ...   | ...            | ...   | ...   | ...   | ...            | ...     | ... | ...   | ...            |             |       |       |                |
|                       | <b>2013</b>    | 395         | 109 | 27.6% | (23.4%, 32.2%) | 436        | 176   | 40.4% | (35.9%, 45.0%) | 1,501 | 535   | 35.6% | (33.3%, 38.1%) | 650     | 72  | 11.1% | (8.9%, 13.7%)  |             |       |       |                |
|                       | <b>2014</b>    | 438         | 109 | 24.9% | (21.1%, 29.1%) | 423        | 171   | 40.4% | (35.9%, 45.2%) | 1,598 | 539   | 33.7% | (31.5%, 36.1%) | 665     | 95  | 14.3% | (11.8%, 17.2%) |             |       |       |                |
|                       | <b>2015</b>    | 459         | 116 | 25.3% | (21.5%, 29.4%) | 399        | 155   | 38.8% | (34.2%, 43.7%) | 1,536 | 515   | 33.5% | (31.2%, 35.9%) | 613     | 95  | 15.5% | (12.8%, 18.6%) |             |       |       |                |
|                       | <b>2016</b>    | 411         | 101 | 24.6% | (20.7%, 29.0%) | 398        | 146   | 36.7% | (32.1%, 41.5%) | 1,507 | 513   | 34.0% | (31.7%, 36.5%) | 649     | 93  | 14.3% | (11.8%, 17.2%) |             |       |       |                |
| <b>Age group</b>      | <b>15-64</b>   | 466         | 87  | 18.7% | (15.4%, 22.5%) | 350        | 98    | 28.0% | (23.6%, 32.9%) | 1,475 | 457   | 31.0% | (28.7%, 33.4%) | 811     | 74  | 9.1%  | (7.3%, 11.3%)  |             |       |       |                |
|                       | <b>65-74</b>   | 554         | 128 | 23.1% | (19.8%, 26.8%) | 477        | 157   | 32.9% | (28.8%, 37.3%) | 1,829 | 517   | 28.3% | (26.3%, 30.4%) | 824     | 94  | 11.4% | (9.4%, 13.8%)  |             |       |       |                |
|                       | <b>75-84</b>   | 481         | 117 | 24.3% | (20.7%, 28.4%) | 546        | 233   | 42.7% | (38.6%, 46.9%) | 1,940 | 693   | 35.7% | (33.6%, 37.9%) | 682     | 114 | 16.7% | (14.1%, 19.7%) |             |       |       |                |
|                       | <b>85+</b>     | 202         | 103 | 51.0% | (44.1%, 57.8%) | 283        | 160   | 56.5% | (50.7%, 62.2%) | 898   | 435   | 48.4% | (45.2%, 51.7%) | 260     | 73  | 28.1% | (23.0%, 33.8%) |             |       |       |                |
| <b>Stage</b>          | <b>1</b>       | 100         | 15  | 15.0% | (9.3%, 23.3%)  | 141        | 37    | 26.2% | (19.7%, 34.1%) | 774   | 74    | 9.6%  | (7.7%, 11.8%)  | 462     | 23  | 5.0%  | (3.3%, 7.4%)   |             |       |       |                |
|                       | <b>2</b>       | 319         | 64  | 20.1% | (16.0%, 24.8%) | 198        | 56    | 28.3% | (22.5%, 34.9%) | 1,517 | 480   | 31.6% | (29.3%, 34.0%) | 415     | 57  | 13.7% | (10.8%, 17.4%) |             |       |       |                |
|                       | <b>3</b>       | 491         | 85  | 17.3% | (14.2%, 20.9%) | 287        | 91    | 31.7% | (26.6%, 37.3%) | 1,597 | 503   | 31.5% | (29.3%, 33.8%) | 991     | 99  | 10.0% | (8.3%, 12.0%)  |             |       |       |                |
|                       | <b>4</b>       | 495         | 164 | 33.1% | (29.1%, 37.4%) | 699        | 317   | 45.4% | (41.7%, 49.1%) | 1,500 | 708   | 47.2% | (44.7%, 49.7%) | 463     | 118 | 25.5% | (21.7%, 29.6%) |             |       |       |                |
|                       | <b>Unknown</b> | 298         | 107 | 35.9% | (30.7%, 41.5%) | 331        | 147   | 44.4% | (39.2%, 49.8%) | 754   | 337   | 44.7% | (41.2%, 48.3%) | 246     | 58  | 23.6% | (18.7%, 29.3%) |             |       |       |                |
|                       |                | Liver       |     |       |                | Pancreatic |       |       |                | Lung  |       |       |                | Ovarian |     |       |                | All cancers |       |       |                |
|                       |                | All         | EP  | %EP   | 95% CI         | All        | EP    | %EP   | 95% CI         | All   | EP    | %EP   | 95% CI         | All     | EP  | %EP   | 95% CI         | All         | EP    | %EP   | 95% CI         |
| <b>Total</b>          |                | 1,155       | 583 | 50.5% | (47.6%, 53.4%) | 1,965      | 1,115 | 56.7% | (54.5%, 58.9%) | 9,365 | 3,882 | 41.5% | (40.5%, 42.5%) | 1,576   | 643 | 40.8% | (38.4%, 43.2%) | 26,139      | 9,763 | 37.4% | (36.8%, 37.9%) |
| <b>Sex</b>            | <b>Male</b>    | 788         | 366 | 46.5% | (43%, 49.9%)   | 988        | 542   | 54.9% | (51.7%, 57.9%) | 4,975 | 2,049 | 41.2% | (39.8%, 42.6%) |         |     |       |                | 14,017      | 4,977 | 35.5% | (34.7%, 36.3%) |
|                       | <b>Female</b>  | 367         | 217 | 59.1% | (54.0%, 64.0%) | 977        | 573   | 58.6% | (55.5%, 61.7%) | 4,390 | 1,833 | 41.8% | (40.3%, 43.2%) | 1,576   | 643 | 40.8% | (38.4%, 43.2%) | 12,122      | 4,786 | 39.5% | (38.6%, 40.4%) |
| <b>Diagnosis year</b> | <b>2012</b>    | ...         | ... | ...   | ...            | ...        | ...   | ...   | ...            | ...   | ...   | ...   | ...            | ...     | ... | ...   | ...            | ...         | ...   | ...   | ...            |
|                       | <b>2013</b>    | 303         | 161 | 53.1% | (47.5%, 58.7%) | 490        | 289   | 59.0% | (54.6%, 63.2%) | 2,339 | 983   | 42.0% | (40.0%, 44.0%) | 423     | 165 | 39.0% | (34.5%, 43.7%) | 6,537       | 2,490 | 38.1% | (36.9%, 39.3%) |
|                       | <b>2014</b>    | 256         | 132 | 51.6% | (45.5%, 57.6%) | 497        | 294   | 59.2% | (54.8%, 63.4%) | 2,317 | 978   | 42.2% | (40.2%, 44.2%) | 392     | 164 | 41.8% | (37.1%, 46.8%) | 6,586       | 2,482 | 37.7% | (36.5%, 38.9%) |
|                       | <b>2015</b>    | 322         | 172 | 53.4% | (48.0%, 58.8%) | 504        | 279   | 55.4% | (51.0%, 59.6%) | 2,346 | 926   | 39.5% | (37.5%, 41.5%) | 366     | 150 | 41.0% | (36.1%, 46.1%) | 6,545       | 2,408 | 36.8% | (35.6%, 38.0%) |
|                       | <b>2016</b>    | 274         | 118 | 43.1% | (37.3%, 49%)   | 474        | 253   | 53.4% | (48.9%, 57.8%) | 2,363 | 995   | 42.1% | (40.1%, 44.1%) | 395     | 164 | 41.5% | (36.8%, 46.4%) | 6,471       | 2,383 | 36.8% | (35.7%, 38.0%) |
| <b>Age group</b>      | <b>15-64</b>   | 276         | 111 | 40.2% | (34.6%, 46.1%) | 497        | 253   | 50.9% | (46.5%, 55.3%) | 2,082 | 826   | 39.7% | (37.6%, 41.8%) | 688     | 227 | 33.0% | (29.6%, 36.6%) | 6,645       | 2,133 | 32.1% | (31%, 33.2%)   |
|                       | <b>65-74</b>   | 393         | 179 | 45.5% | (40.7%, 50.5%) | 599        | 317   | 52.9% | (48.9%, 56.9%) | 3,335 | 1,222 | 36.6% | (35.0%, 38.3%) | 442     | 177 | 40.1% | (35.6%, 44.7%) | 8,453       | 2,791 | 33.0% | (32.0%, 34.0%) |
|                       | <b>75-84</b>   | 347         | 196 | 56.5% | (51.2%, 61.6%) | 587        | 334   | 56.9% | (52.9%, 60.8%) | 2,853 | 1,233 | 43.2% | (41.4%, 45.0%) | 322     | 168 | 52.2% | (46.7%, 57.6%) | 7,758       | 3,088 | 39.8% | (38.7%, 40.9%) |
|                       | <b>85+</b>     | 139         | 97  | 69.8% | (61.7%, 76.8%) | 282        | 211   | 74.8% | (69.4%, 79.5%) | 1,095 | 601   | 54.9% | (51.9%, 57.8%) | 124     | 71  | 57.3% | (48.5%, 65.6%) | 3,283       | 1,751 | 53.3% | (51.6%, 55.0%) |
| <b>Stage</b>          | <b>1</b>       | 22          | 8   | 36.4% | (19.7%, 57.0%) | 73         | 33    | 45.2% | (34.3%, 56.6%) | 1,326 | 288   | 21.7% | (19.6%, 24.0%) | 412     | 97  | 23.5% | (19.7%, 27.9%) | 3,310       | 575   | 17.4% | (16.1%, 18.7%) |
|                       | <b>2</b>       | 40          | 10  | 25.0% | (14.2%, 40.2%) | 172        | 93    | 54.1% | (46.6%, 61.3%) | 714   | 165   | 23.1% | (20.2%, 26.3%) | 76      | 16  | 21.1% | (13.4%, 31.5%) | 3,451       | 941   | 27.3% | (25.8%, 28.8%) |
|                       | <b>3</b>       | 47          | 18  | 38.3% | (25.8%, 52.6%) | 153        | 81    | 52.9% | (45.1%, 60.7%) | 2,074 | 615   | 29.7% | (27.7%, 31.7%) | 398     | 188 | 47.2% | (42.4%, 52.1%) | 6,038       | 1,680 | 27.8% | (26.7%, 29.0%) |
|                       | <b>4</b>       | 246         | 138 | 56.1% | (49.8%, 62.2%) | 955        | 539   | 56.4% | (53.3%, 59.6%) | 4,400 | 2,363 | 53.7% | (52.2%, 55.2%) | 248     | 138 | 55.6% | (49.4%, 61.7%) | 9,006       | 4,485 | 49.8% | (48.8%, 50.8%) |
|                       | <b>Unknown</b> | 800         | 409 | 51.1% | (47.7%, 54.6%) | 612        | 369   | 60.3% | (56.4%, 64.1%) | 851   | 451   | 53.0% | (49.6%, 56.3%) | 442     | 204 | 46.2% | (41.6%, 50.8%) | 4,334       | 2,082 | 48.0% | (46.6%, 49.5%) |

| Alberta               |                | Oesophageal |     |       |                | Stomach |     |       |                | Colon |       |       |                | Rectal |     |       |                |
|-----------------------|----------------|-------------|-----|-------|----------------|---------|-----|-------|----------------|-------|-------|-------|----------------|--------|-----|-------|----------------|
|                       |                | All         | EP  | %EP   | 95% CI         | All     | EP  | %EP   | 95% CI         | All   | EP    | %EP   | 95% CI         | All    | EP  | %EP   | 95% CI         |
| <b>Total</b>          |                | 708         | 163 | 23.0% | (20.1%, 26.3%) | 1,020   | 353 | 34.6% | (31.8%, 37.6%) | 5,142 | 1,471 | 28.6% | (27.4%, 29.9%) | 1,976  | 254 | 12.9% | (11.5%, 14.4%) |
| <b>Sex</b>            | <b>Male</b>    | 567         | 126 | 22.2% | (19.0%, 25.8%) | 656     | 223 | 34.0% | (30.5%, 37.7%) | 2,738 | 744   | 27.2% | (25.5%, 28.9%) | 1,258  | 154 | 12.2% | (10.5%, 14.2%) |
|                       | <b>Female</b>  | 141         | 37  | 26.2% | (19.7%, 34.1%) | 364     | 130 | 35.7% | (31.0%, 40.8%) | 2,404 | 727   | 30.2% | (28.4%, 32.1%) | 718    | 100 | 13.9% | (11.6%, 16.7%) |
| <b>Diagnosis year</b> | <b>2012</b>    | 168         | 29  | 17.3% | (12.3%, 23.7%) | 253     | 79  | 31.2% | (25.8%, 37.2%) | 1,166 | 355   | 30.4% | (27.9%, 33.1%) | 499    | 74  | 14.8% | (12.0%, 18.2%) |
|                       | <b>2013</b>    | 184         | 47  | 25.5% | (19.8%, 32.3%) | 231     | 82  | 35.5% | (29.6%, 41.9%) | 1,214 | 392   | 32.3% | (29.7%, 35.0%) | 454    | 62  | 13.7% | (10.8%, 17.1%) |
|                       | <b>2014</b>    | 179         | 37  | 20.7% | (15.4%, 27.2%) | 248     | 86  | 34.7% | (29.0%, 40.8%) | 1,416 | 374   | 26.4% | (24.2%, 28.8%) | 506    | 60  | 11.9% | (9.3%, 15.0%)  |
|                       | <b>2015</b>    | 177         | 50  | 28.2% | (22.1%, 35.3%) | 288     | 106 | 36.8% | (31.4%, 42.5%) | 1,346 | 350   | 26.0% | (23.7%, 28.4%) | 517    | 58  | 11.2% | (8.8%, 14.2%)  |
|                       | <b>2016</b>    | ...         | ... | ...   | ...            | ...     | ... | ...   | ...            | ...   | ...   | ...   | ...            | ...    | ... | ...   | ...            |
| <b>Age group</b>      | <b>15-64</b>   | 341         | 71  | 20.8% | (16.8%, 25.4%) | 406     | 113 | 27.8% | (23.7%, 32.4%) | 2,007 | 539   | 26.9% | (25.0%, 28.8%) | 1,002  | 85  | 8.5%  | (6.9%, 10.4%)  |
|                       | <b>65-74</b>   | 184         | 28  | 15.2% | (10.7%, 21.1%) | 243     | 66  | 27.2% | (22.0%, 33.1%) | 1,355 | 288   | 21.3% | (19.2%, 23.5%) | 503    | 60  | 11.9% | (9.4%, 15.1%)  |
|                       | <b>75-84</b>   | 127         | 42  | 33.1% | (25.5%, 41.6%) | 241     | 99  | 41.1% | (35.1%, 47.4%) | 1,240 | 384   | 31.0% | (28.5%, 33.6%) | 357    | 69  | 19.3% | (15.6%, 23.7%) |
|                       | <b>85+</b>     | 56          | 22  | 39.3% | (27.6%, 52.4%) | 130     | 75  | 57.7% | (49.1%, 65.8%) | 540   | 260   | 48.1% | (44.0%, 52.4%) | 114    | 40  | 35.1% | (26.9%, 44.2%) |
| <b>Stage</b>          | <b>1</b>       | 66          | 6   | 9.1%  | (4.2%, 18.4%)  | 144     | 32  | 22.2% | (16.2%, 29.7%) | 1,214 | 181   | 14.9% | (13.0%, 17.0%) | 488    | 19  | 3.9%  | (2.5%, 6.0%)   |
|                       | <b>2</b>       | 87          | 15  | 17.2% | (10.7%, 26.5%) | 112     | 36  | 32.1% | (24.2%, 41.3%) | 1,251 | 354   | 28.3% | (25.9%, 30.9%) | 314    | 44  | 14.0% | (10.6%, 18.3%) |
|                       | <b>3</b>       | 150         | 25  | 16.7% | (11.6%, 23.4%) | 183     | 49  | 26.8% | (20.9%, 33.6%) | 1,277 | 341   | 26.7% | (24.3%, 29.2%) | 667    | 64  | 9.6%  | (7.6%, 12.1%)  |
|                       | <b>4</b>       | 302         | 89  | 29.5% | (24.6%, 34.8%) | 450     | 186 | 41.3% | (36.9%, 45.9%) | 1,167 | 511   | 43.8% | (41.0%, 46.6%) | 369    | 105 | 28.5% | (24.1%, 33.3%) |
|                       | <b>Unknown</b> | 103         | 28  | 27.2% | (19.5%, 36.5%) | 131     | 50  | 38.2% | (30.3%, 46.7%) | 233   | 84    | 36.1% | (30.2%, 42.4%) | 138    | 22  | 15.9% | (10.8%, 23.0%) |

|                       |                | Liver |     |       |                | Pancreatic |     |       |                | Lung  |       |       |                | Ovarian |     |       |                | All cancers |       |       |                |
|-----------------------|----------------|-------|-----|-------|----------------|------------|-----|-------|----------------|-------|-------|-------|----------------|---------|-----|-------|----------------|-------------|-------|-------|----------------|
|                       |                | All   | EP  | %EP   | 95% CI         | All        | EP  | %EP   | 95% CI         | All   | EP    | %EP   | 95% CI         | All     | EP  | %EP   | 95% CI         | All         | EP    | %EP   | 95% CI         |
| <b>Total</b>          |                | 1,054 | 334 | 31.7% | (29.0%, 34.6%) | 1,671      | 683 | 40.9% | (38.5%, 43.2%) | 7,468 | 2,484 | 33.3% | (32.2%, 34.3%) | 930     | 239 | 25.7% | (23.0%, 28.6%) | 19,969      | 5,981 | 30.0% | (29.3%, 30.6%) |
| <b>Sex</b>            | <b>Male</b>    | 736   | 235 | 31.9% | (28.7%, 35.4%) | 817        | 338 | 41.4% | (38.0%, 44.8%) | 3,683 | 1,296 | 35.2% | (33.7%, 36.7%) |         |     |       |                | 10,455      | 3,116 | 29.8% | (28.9%, 30.7%) |
|                       | <b>Female</b>  | 318   | 99  | 31.1% | (26.3%, 36.4%) | 854        | 345 | 40.4% | (37.2%, 43.7%) | 3,785 | 1,188 | 31.4% | (29.9%, 32.9%) | 930     | 239 | 25.7% | (23.0%, 28.6%) | 9,514       | 2,865 | 30.1% | (29.2%, 31.0%) |
| <b>Diagnosis year</b> | <b>2012</b>    | 239   | 79  | 33.1% | (27.4%, 39.2%) | 362        | 151 | 41.7% | (36.7%, 46.9%) | 1,721 | 578   | 33.6% | (31.4%, 35.9%) | 220     | 47  | 21.4% | (16.5%, 27.2%) | 4,628       | 1,392 | 30.1% | (28.8%, 31.4%) |
|                       | <b>2013</b>    | 251   | 73  | 29.1% | (23.8%, 35.0%) | 454        | 182 | 40.1% | (35.7%, 44.7%) | 1,795 | 591   | 32.9% | (30.8%, 35.1%) | 229     | 56  | 24.5% | (19.3%, 30.4%) | 4,812       | 1,485 | 30.9% | (29.6%, 32.2%) |
|                       | <b>2014</b>    | 262   | 84  | 32.1% | (26.7%, 37.9%) | 434        | 182 | 41.9% | (37.4%, 46.6%) | 2,021 | 677   | 33.5% | (31.5%, 35.6%) | 241     | 70  | 29.0% | (23.7%, 35.1%) | 5,307       | 1,570 | 29.6% | (28.4%, 30.8%) |
|                       | <b>2015</b>    | 302   | 98  | 32.5% | (27.4%, 37.9%) | 421        | 168 | 39.9% | (35.3%, 44.7%) | 1,931 | 638   | 33.0% | (31.0%, 35.2%) | 240     | 66  | 27.5% | (22.2%, 33.5%) | 5,222       | 1,534 | 29.4% | (28.2%, 30.6%) |
|                       | <b>2016</b>    | ...   | ... | ...   | ...            | ...        | ... | ...   | ...            | ...   | ...   | ...   | ...            | ...     | ... | ...   | ...            | ...         | ...   | ...   |                |
| <b>Age group</b>      | <b>15-64</b>   | 535   | 136 | 25.4% | (21.9%, 29.3%) | 582        | 186 | 32.0% | (28.3%, 35.9%) | 2,301 | 706   | 30.7% | (28.8%, 32.6%) | 527     | 111 | 21.1% | (17.8%, 24.7%) | 7,701       | 1,947 | 25.3% | (24.3%, 26.3%) |
|                       | <b>65-74</b>   | 267   | 80  | 30.0% | (24.8%, 35.7%) | 435        | 174 | 40.0% | (35.5%, 44.7%) | 2,538 | 757   | 29.8% | (28.1%, 31.6%) | 189     | 39  | 20.6% | (15.5%, 27.0%) | 5,714       | 1,492 | 26.1% | (25.0%, 27.3%) |
|                       | <b>75-84</b>   | 194   | 79  | 40.7% | (34.1%, 47.8%) | 425        | 193 | 45.4% | (40.7%, 50.2%) | 1,982 | 718   | 36.2% | (34.1%, 38.4%) | 145     | 51  | 35.2% | (27.9%, 43.2%) | 4,711       | 1,635 | 34.7% | (33.4%, 36.1%) |
|                       | <b>85+</b>     | 58    | 39  | 67.2% | (54.4%, 77.9%) | 229        | 130 | 56.8% | (50.3%, 63.0%) | 647   | 303   | 46.8% | (43.0%, 50.7%) | 69      | 38  | 55.1% | (43.4%, 66.2%) | 1,843       | 907   | 49.2% | (46.9%, 51.5%) |
| <b>Stage</b>          | <b>1</b>       | 277   | 49  | 17.7% | (13.6%, 22.6%) | 112        | 26  | 23.2% | (16.4%, 31.8%) | 1,361 | 159   | 11.7% | (10.1%, 13.5%) | 165     | 19  | 11.5% | (7.5%, 17.3%)  | 3,827       | 491   | 12.8% | (11.8%, 13.9%) |
|                       | <b>2</b>       | 176   | 37  | 21.0% | (15.7%, 27.6%) | 414        | 134 | 32.4% | (28.0%, 37.0%) | 599   | 94    | 15.7% | (13.0%, 18.8%) | 89      | 11  | 12.4% | (7.0%, 20.8%)  | 3,042       | 725   | 23.8% | (22.4%, 25.4%) |
|                       | <b>3</b>       | 217   | 87  | 40.1% | (33.8%, 46.7%) | 127        | 39  | 30.7% | (23.4%, 39.2%) | 1,329 | 313   | 23.6% | (21.3%, 25.9%) | 470     | 120 | 25.5% | (21.8%, 29.7%) | 4,420       | 1,038 | 23.5% | (22.3%, 24.8%) |
|                       | <b>4</b>       | 272   | 113 | 41.5% | (35.8%, 47.5%) | 919        | 436 | 47.4% | (44.2%, 50.7%) | 4,080 | 1,883 | 46.2% | (44.6%, 47.7%) | 174     | 76  | 43.7% | (36.5%, 51.1%) | 7,733       | 3,399 | 44.0% | (42.9%, 45.1%) |
|                       | <b>Unknown</b> | 112   | 48  | 42.9% | (34.1%, 52.1%) | 99         | 48  | 48.5% | (38.9%, 58.2%) | 99    | 35    | 35.4% | (26.6%, 45.2%) | 32      | 13  | 40.6% | (25.5%, 57.7%) | 947         | 328   | 34.6% | (31.7%, 37.7%) |

| Atlantic Canada \$    |                | Oesophageal |     |       |                | Stomach    |     |       |                | Colon |       |       |                | Rectal  |     |       |                |             |       |       |                |
|-----------------------|----------------|-------------|-----|-------|----------------|------------|-----|-------|----------------|-------|-------|-------|----------------|---------|-----|-------|----------------|-------------|-------|-------|----------------|
|                       |                | All         | EP  | %EP   | 95% CI         | All        | EP  | %EP   | 95% CI         | All   | EP    | %EP   | 95% CI         | All     | EP  | %EP   | 95% CI         |             |       |       |                |
| <b>Total</b>          |                | 675         | 140 | 20.7% | (17.9%, 24%)   | 1,150      | 350 | 30.4% | (27.8%, 33.2%) | 6,135 | 1,745 | 28.4% | (27.3%, 29.6%) | 2,100   | 265 | 12.6% | (11.3%, 14.1%) |             |       |       |                |
| <b>Sex</b>            | <b>Male</b>    | 535         | 110 | 20.6% | (17.4%, 24.2%) | 775        | 230 | 29.7% | (26.6%, 33.0%) | 3,250 | 885   | 27.2% | (25.7%, 28.8%) | 1,395   | 165 | 11.8% | (10.2%, 13.6%) |             |       |       |                |
|                       | <b>Female</b>  | 150         | 30  | 20.0% | (14.4%, 27.1%) | 370        | 120 | 32.4% | (27.9%, 37.4%) | 2,890 | 860   | 29.8% | (28.1%, 31.5%) | 710     | 100 | 14.1% | (11.7%, 16.8%) |             |       |       |                |
| <b>Diagnosis year</b> | <b>2012</b>    | 150         | 45  | 30.0% | (23.2%, 37.8%) | 280        | 95  | 33.9% | (28.6%, 39.7%) | 1,515 | 420   | 27.7% | (25.5%, 30.0%) | 520     | 60  | 11.5% | (9.1%, 14.6%)  |             |       |       |                |
|                       | <b>2013</b>    | 175         | 30  | 17.1% | (12.3%, 23.4%) | 295        | 90  | 30.5% | (25.5%, 36.0%) | 1,540 | 430   | 27.9% | (25.7%, 30.2%) | 535     | 70  | 13.1% | (10.5%, 16.2%) |             |       |       |                |
|                       | <b>2014</b>    | 180         | 35  | 19.4% | (14.3%, 25.8%) | 295        | 90  | 30.5% | (25.5%, 36.0%) | 1,525 | 455   | 29.8% | (27.6%, 32.2%) | 510     | 70  | 13.7% | (11.0%, 17.0%) |             |       |       |                |
|                       | <b>2015</b>    | 180         | 40  | 22.2% | (16.8%, 28.8%) | 275        | 90  | 32.7% | (27.5%, 38.5%) | 1,550 | 430   | 27.7% | (25.6%, 30.0%) | 535     | 70  | 13.1% | (10.5%, 16.2%) |             |       |       |                |
|                       | <b>2016</b>    | ...         | ... | ...   | ...            | ...        | ... | ...   | ...            | ...   | ...   | ...   | ...            | ...     | ... | ...   | ...            |             |       |       |                |
| <b>Age group</b>      | <b>15-64</b>   | 270         | 45  | 16.7% | (12.7%, 21.6%) | 370        | 75  | 20.3% | (16.5%, 24.7%) | 1,890 | 465   | 24.6% | (22.7%, 26.6%) | 890     | 85  | 9.6%  | (7.8%, 11.7%)  |             |       |       |                |
|                       | <b>65-74</b>   | 220         | 45  | 20.5% | (15.7%, 26.3%) | 355        | 105 | 29.6% | (25.1%, 34.5%) | 1,945 | 455   | 23.4% | (21.6%, 25.3%) | 700     | 70  | 10.0% | (8.0%, 12.4%)  |             |       |       |                |
|                       | <b>75-84</b>   | 130         | 40  | 30.8% | (23.5%, 39.2%) | 290        | 100 | 34.5% | (29.2%, 40.1%) | 1,635 | 520   | 31.8% | (29.6%, 34.1%) | 380     | 60  | 15.8% | (12.5%, 19.8%) |             |       |       |                |
|                       | <b>85+</b>     | 65          | 20  | 30.8% | (20.9%, 42.8%) | 130        | 70  | 53.8% | (45.3%, 62.2%) | 670   | 305   | 45.5% | (41.8%, 49.3%) | 130     | 45  | 34.6% | (27.0%, 43.1%) |             |       |       |                |
| <b>Stage</b>          | <b>1</b>       | 115         | 20  | 17.4% | (11.5%, 25.3%) | 160        | 35  | 21.9% | (16.2%, 28.9%) | 1,345 | 190   | 14.1% | (12.4%, 16.1%) | 505     | 40  | 7.9%  | (5.9%, 10.6%)  |             |       |       |                |
|                       | <b>2</b>       | 85          | 20  | 23.5% | (15.8%, 33.6%) | 80         | 25  | 31.3% | (22.2%, 42.1%) | 1,655 | 420   | 25.4% | (23.3%, 27.5%) | 385     | 40  | 10.4% | (7.7%, 13.8%)  |             |       |       |                |
|                       | <b>3</b>       | 90          | 15  | 16.7% | (10.4%, 25.7%) | 100        | 30  | 30.0% | (21.9%, 39.6%) | 1,550 | 460   | 29.7% | (27.5%, 32.0%) | 680     | 55  | 8.1%  | (6.3%, 10.4%)  |             |       |       |                |
|                       | <b>4</b>       | 160         | 45  | 28.1% | (21.7%, 35.5%) | 280        | 115 | 41.1% | (35.5%, 46.9%) | 1,320 | 560   | 42.4% | (39.8%, 45.1%) | 410     | 95  | 23.2% | (19.3%, 27.5%) |             |       |       |                |
|                       | <b>Unknown</b> | 230         | 50  | 21.7% | (16.9%, 27.5%) | 525        | 155 | 29.5% | (25.8%, 33.6%) | 2,655 | 110   | 41.5% | (35.7%, 47.5%) | 125     | 30  | 24.0% | (17.4%, 32.2%) |             |       |       |                |
|                       |                | Liver       |     |       |                | Pancreatic |     |       |                | Lung  |       |       |                | Ovarian |     |       |                | All cancers |       |       |                |
|                       |                | All         | EP  | %EP   | 95% CI         | All        | EP  | %EP   | 95% CI         | All   | EP    | %EP   | 95% CI         | All     | EP  | %EP   | 95% CI         | All         | EP    | %EP   | 95% CI         |
| <b>Total</b>          |                | 685         | 235 | 34.3% | (30.8%, 37.9%) | 1,445      | 560 | 38.8% | (36.3%, 41.3%) | 9,135 | 2,430 | 26.6% | (25.7%, 27.5%) | 800     | 225 | 28.1% | (25.1%, 31.3%) | 22,125      | 5,950 | 26.9% | (26.3%, 27.5%) |
| <b>Sex</b>            | <b>Male</b>    | 460         | 135 | 29.3% | (25.4%, 33.7%) | 765        | 290 | 37.9% | (34.5%, 41.4%) | 4,940 | 1,375 | 27.8% | (26.6%, 29.1%) |         |     |       |                | 12,120      | 3,190 | 26.3% | (25.5%, 27.1%) |
|                       | <b>Female</b>  | 225         | 100 | 44.4% | (38.1%, 51.0%) | 685        | 270 | 39.4% | (35.8%, 43.1%) | 4,195 | 1,055 | 25.1% | (23.9%, 26.5%) | 795     | 225 | 28.3% | (25.3%, 31.5%) | 10,020      | 2,760 | 27.5% | (26.7%, 28.4%) |
| <b>Diagnosis year</b> | <b>2012</b>    | 180         | 70  | 38.9% | (32.1%, 46.2%) | 335        | 120 | 35.8% | (30.9%, 41.1%) | 2,220 | 590   | 26.6% | (24.8%, 28.5%) | 205     | 50  | 24.4% | (19.0%, 30.7%) | 5,405       | 1,450 | 26.8% | (25.7%, 28.0%) |
|                       | <b>2013</b>    | 160         | 55  | 34.4% | (27.5%, 42.0%) | 395        | 160 | 40.5% | (35.8%, 45.4%) | 2,240 | 565   | 25.2% | (23.5%, 27.1%) | 215     | 65  | 30.2% | (24.5%, 36.7%) | 5,555       | 1,465 | 26.4% | (25.2%, 27.5%) |
|                       | <b>2014</b>    | 155         | 45  | 29.0% | (22.5%, 36.6%) | 360        | 130 | 36.1% | (31.3%, 41.2%) | 2,425 | 680   | 28.0% | (26.3%, 29.9%) | 210     | 60  | 28.6% | (22.9%, 35.0%) | 5,660       | 1,565 | 27.7% | (26.5%, 28.8%) |
|                       | <b>2015</b>    | 190         | 65  | 34.2% | (27.8%, 41.2%) | 350        | 145 | 41.4% | (36.4%, 46.7%) | 2,250 | 580   | 25.8% | (24.0%, 27.6%) | 170     | 50  | 29.4% | (23.1%, 36.7%) | 5,500       | 1,470 | 26.7% | (25.6%, 27.9%) |
|                       | <b>2016</b>    | ...         | ... | ...   | ...            | ...        | ... | ...   | ...            | ...   | ...   | ...   | ...            | ...     | ... | ...   | ...            | ...         | ...   | ...   |                |
| <b>Age group</b>      | <b>15-64</b>   | 245         | 75  | 30.6% | (25.2%, 36.6%) | 455        | 155 | 34.1% | (29.9%, 38.5%) | 2,630 | 605   | 23.0% | (21.4%, 24.7%) | 360     | 65  | 18.1% | (14.4%, 22.4%) | 7,110       | 1,570 | 22.1% | (21.1%, 23.1%) |
|                       | <b>65-74</b>   | 230         | 70  | 30.4% | (24.8%, 36.7%) | 460        | 165 | 35.9% | (31.6%, 40.4%) | 3,335 | 810   | 24.3% | (22.9%, 25.8%) | 215     | 65  | 30.2% | (24.5%, 36.7%) | 7,460       | 1,785 | 23.9% | (23.0%, 24.9%) |
|                       | <b>75-84</b>   | 145         | 60  | 41.4% | (33.7%, 49.5%) | 360        | 155 | 43.1% | (38.0%, 48.2%) | 2,425 | 715   | 29.5% | (27.7%, 31.3%) | 145     | 60  | 41.4% | (33.7%, 49.5%) | 5,510       | 1,710 | 31.0% | (29.8%, 32.3%) |
|                       | <b>85+</b>     | 55          | 30  | 54.5% | (41.5%, 67.0%) | 170        | 80  | 47.1% | (39.7%, 54.5%) | 745   | 300   | 40.3% | (36.8%, 43.8%) | 70      | 40  | 57.1% | (45.5%, 68.1%) | 2,035       | 890   | 43.7% | (41.6%, 45.9%) |
| <b>Stage</b>          | <b>1</b>       | 110         | 20  | 18.2% | (12.1%, 26.4%) | 125        | 40  | 32.0% | (24.5%, 40.6%) | 2,055 | 200   | 9.7%  | (8.5%, 11.1%)  | 135     | 15  | 11.1% | (6.8%, 17.5%)  | 4,550       | 560   | 12.3% | (11.4%, 13.3%) |
|                       | <b>2</b>       | 55          | 5   | 9.1%  | (3.9%, 19.6%)  | 180        | 45  | 25.0% | (19.2%, 31.8%) | 765   | 95    | 12.4% | (10.3%, 14.9%) | 45      | 10  | 22.2% | (12.5%, 36.3%) | 3,250       | 660   | 20.3% | (19.0%, 21.7%) |
|                       | <b>3</b>       | 55          | 20  | 36.4% | (24.9%, 49.6%) | 55         | 15  | 27.3% | (17.3%, 40.2%) | 1,745 | 325   | 18.6% | (16.9%, 20.5%) | 240     | 50  | 20.8% | (16.2%, 26.4%) | 4,515       | 970   | 21.5% | (20.3%, 22.7%) |
|                       | <b>4</b>       | 125         | 35  | 28.0% | (20.9%, 36.4%) | 480        | 185 | 38.5% | (34.3%, 43.0%) | 4,395 | 1,750 | 39.8% | (38.4%, 41.3%) | 105     | 45  | 42.9% | (33.8%, 52.4%) | 7,275       | 2,830 | 38.9% | (37.8%, 40.0%) |
|                       | <b>Unknown</b> | 335         | 145 | 43.3% | (38.1%, 48.6%) | 600        | 270 | 45.0% | (41.1%, 49.0%) | 1,655 | 60    | 36.4% | (29.4%, 43.9%) | 285     | 105 | 36.8% | (31.5%, 42.6%) | 2,530       | 925   | 36.6% | (34.7%, 38.5%) |

| British Columbia S    |                | Oesophageal |     |       |                | Stomach    |       |       |                | Colon  |       |       |                | Rectal  |     |       |                | All cancers |        |       |                |     |  |
|-----------------------|----------------|-------------|-----|-------|----------------|------------|-------|-------|----------------|--------|-------|-------|----------------|---------|-----|-------|----------------|-------------|--------|-------|----------------|-----|--|
|                       |                | All         | EP  | %EP   | 95% CI         | All        | EP    | %EP   | 95% CI         | All    | EP    | %EP   | 95% CI         | All     | EP  | %EP   | 95% CI         |             |        |       |                |     |  |
| <b>Total</b>          |                | 1,165       | 330 | 28.3% | (25.8%, 31.0%) | 1,590      | 640   | 40.3% | (37.9%, 42.7%) | 9,160  | 2,520 | 27.5% | (26.6%, 28.4%) | 3,430   | 410 | 12.0% | (10.9%, 13.1%) |             |        |       |                |     |  |
| <b>Sex</b>            | <b>Male</b>    | 865         | 235 | 27.2% | (24.3%, 30.2%) | 1,055      | 410   | 38.9% | (36.0%, 41.8%) | 4,855  | 1,275 | 26.3% | (25.0%, 27.5%) | 2,170   | 255 | 11.8% | (10.5%, 13.2%) |             |        |       |                |     |  |
|                       | <b>Female</b>  | 305         | 95  | 31.2% | (26.2%, 36.6%) | 535        | 230   | 43.0% | (38.9%, 47.2%) | 4,305  | 1,245 | 28.9% | (27.6%, 30.3%) | 1,260   | 155 | 12.3% | (10.6%, 14.2%) |             |        |       |                |     |  |
| <b>Diagnosis year</b> | <b>2012</b>    | 305         | 75  | 24.6% | (20.1%, 29.7%) | 400        | 165   | 41.3% | (36.5%, 46.1%) | 2,205  | 660   | 29.9% | (28.1%, 31.9%) | 825     | 100 | 12.1% | (10.1%, 14.5%) |             |        |       |                |     |  |
|                       | <b>2013</b>    | 265         | 65  | 24.5% | (19.7%, 30.0%) | 370        | 155   | 41.9% | (37.0%, 47.0%) | 2,345  | 700   | 29.9% | (28.0%, 31.7%) | 825     | 125 | 15.2% | (12.9%, 17.8%) |             |        |       |                |     |  |
|                       | <b>2014</b>    | 295         | 90  | 30.5% | (25.5%, 36.0%) | 415        | 160   | 38.6% | (34.0%, 43.3%) | 2,390  | 630   | 26.4% | (24.6%, 28.2%) | 855     | 90  | 10.5% | (8.6%, 12.8%)  |             |        |       |                |     |  |
|                       | <b>2015</b>    | 300         | 90  | 30.0% | (25.1%, 35.4%) | 410        | 160   | 39.0% | (34.4%, 43.8%) | 2,225  | 525   | 23.6% | (21.9%, 25.4%) | 920     | 95  | 10.3% | (8.5%, 12.5%)  |             |        |       |                |     |  |
|                       | <b>2016</b>    | ...         | ... | ...   | ...            | ...        | ...   | ...   | ...            | ...    | ...   | ...   | ...            | ...     | ... | ...   | ...            | ...         |        |       |                |     |  |
| <b>Age group</b>      | <b>15-64</b>   | 400         | 105 | 26.3% | (22.2%, 30.8%) | 510        | 175   | 34.3% | (30.3%, 38.5%) | 2,790  | 700   | 25.1% | (23.5%, 26.7%) | 1,450   | 120 | 8.3%  | (7.0%, 9.8%)   |             |        |       |                |     |  |
|                       | <b>65-74</b>   | 355         | 85  | 23.9% | (19.8%, 28.6%) | 440        | 140   | 31.8% | (27.6%, 36.3%) | 2,660  | 545   | 20.5% | (19.0%, 22.1%) | 990     | 95  | 9.6%  | (7.9%, 11.6%)  |             |        |       |                |     |  |
|                       | <b>75-84</b>   | 295         | 80  | 27.1% | (22.4%, 32.5%) | 425        | 180   | 42.4% | (37.7%, 47.1%) | 2,475  | 680   | 27.5% | (25.8%, 29.3%) | 690     | 95  | 13.8% | (11.4%, 16.5%) |             |        |       |                |     |  |
|                       | <b>85+</b>     | 115         | 55  | 47.8% | (38.9%, 56.9%) | 215        | 135   | 62.8% | (56.2%, 69.0%) | 1,240  | 600   | 48.4% | (45.6%, 51.2%) | 290     | 105 | 36.2% | (30.9%, 41.9%) |             |        |       |                |     |  |
| <b>Stage</b>          | <b>1</b>       | ...         | ... | ...   | ...            | ...        | ...   | ...   | ...            | 1,855  | 180   | 9.7%  | (8.4%, 11.1%)  | 610     | 35  | 5.7%  | (4.2%, 7.9%)   |             |        |       |                |     |  |
|                       | <b>2</b>       | ...         | ... | ...   | ...            | ...        | ...   | ...   | ...            | 2,240  | 625   | 27.9% | (26.1%, 29.8%) | 630     | 65  | 10.3% | (8.2%, 12.9%)  |             |        |       |                |     |  |
|                       | <b>3</b>       | ...         | ... | ...   | ...            | ...        | ...   | ...   | ...            | 2,330  | 635   | 27.3% | (25.5%, 29.1%) | 1,050   | 100 | 9.5%  | (7.9%, 11.4%)  |             |        |       |                |     |  |
|                       | <b>4</b>       | ...         | ... | ...   | ...            | ...        | ...   | ...   | ...            | 1,785  | 780   | 43.7% | (41.4%, 46.0%) | 555     | 125 | 22.5% | (19.2%, 26.2%) |             |        |       |                |     |  |
|                       | <b>Unknown</b> | 1,165       | 325 | 27.9% | (25.4%, 30.5%) | 1,590      | 640   | 40.3% | (37.9%, 42.7%) | 950    | 295   | 31.1% | (28.2%, 34.1%) | 590     | 80  | 13.6% | (11.0%, 16.6%) |             |        |       |                |     |  |
|                       |                | Liver       |     |       |                | Pancreatic |       |       |                | Lung   |       |       |                | Ovarian |     |       |                |             |        |       |                |     |  |
|                       |                | All         | EP  | %EP   | 95% CI         | All        | EP    | %EP   | 95% CI         | All    | EP    | %EP   | 95% CI         | All     | EP  | %EP   | 95% CI         | All         | EP     | %EP   | 95% CI         |     |  |
| <b>Total</b>          |                | 1,760       | 670 | 38.1% | (35.8%, 40.4%) | 2,620      | 1,085 | 41.4% | (39.5%, 43.3%) | 12,320 | 4,090 | 33.2% | (32.4%, 34.0%) | 1,610   | 510 | 31.7% | (29.5%, 34.0%) | 33,655      | 10,255 | 30.5% | (30.0%, 31.0%) |     |  |
| <b>Sex</b>            | <b>Male</b>    | 1,245       | 460 | 36.9% | (34.3%, 39.7%) | 1,350      | 560   | 41.5% | (38.9%, 44.1%) | 6,105  | 2,135 | 35.0% | (33.8%, 36.2%) | 1,615   | 510 | 31.6% | (29.4%, 33.9%) | 17,645      | 5,330  | 30.2% | (29.5%, 30.9%) |     |  |
|                       | <b>Female</b>  | 515         | 210 | 40.8% | (36.6%, 45.1%) | 1,265      | 525   | 41.5% | (38.8%, 44.2%) | 6,210  | 1,955 | 31.5% | (30.3%, 32.6%) | 1,615   | 510 | 31.6% | (29.4%, 33.9%) | 16,010      | 4,925  | 30.8% | (30.1%, 31.5%) |     |  |
| <b>Diagnosis year</b> | <b>2012</b>    | 410         | 150 | 36.6% | (32.1%, 41.4%) | 605        | 245   | 40.5% | (36.7%, 44.5%) | 3,005  | 985   | 32.8% | (31.1%, 34.5%) | 355     | 120 | 33.8% | (29.1%, 38.9%) | 8,110       | 2,500  | 30.8% | (29.8%, 31.8%) |     |  |
|                       | <b>2013</b>    | 465         | 190 | 40.9% | (36.5%, 45.4%) | 700        | 300   | 42.9% | (39.2%, 46.6%) | 3,005  | 1,025 | 34.1% | (32.4%, 35.8%) | 395     | 130 | 32.9% | (28.5%, 37.7%) | 8,370       | 2,690  | 32.1% | (31.1%, 33.1%) |     |  |
|                       | <b>2014</b>    | 450         | 160 | 35.6% | (31.3%, 40.1%) | 685        | 290   | 42.3% | (38.7%, 46.1%) | 3,165  | 1,055 | 33.3% | (31.7%, 35.0%) | 455     | 135 | 29.7% | (25.7%, 34.0%) | 8,710       | 2,610  | 30.0% | (29.9%, 30.9%) |     |  |
|                       | <b>2015</b>    | 435         | 170 | 39.1% | (34.6%, 43.7%) | 630        | 255   | 40.5% | (36.7%, 44.4%) | 3,135  | 1,025 | 32.7% | (31.1%, 34.4%) | 405     | 120 | 29.6% | (25.4%, 34.3%) | 8,460       | 2,440  | 28.8% | (27.9%, 29.8%) |     |  |
|                       | <b>2016</b>    | ...         | ... | ...   | ...            | ...        | ...   | ...   | ...            | ...    | ...   | ...   | ...            | ...     | ... | ...   | ...            | ...         | ...    | ...   | ...            | ... |  |
| <b>Age group</b>      | <b>15-64</b>   | 720         | 240 | 33.3% | (30.0%, 36.9%) | 750        | 285   | 38.0% | (34.6%, 41.5%) | 3,285  | 990   | 30.1% | (28.6%, 31.7%) | 795     | 205 | 25.8% | (22.9%, 28.9%) | 10,700      | 2,820  | 26.4% | (25.5%, 27.2%) |     |  |
|                       | <b>65-74</b>   | 520         | 165 | 31.7% | (27.9%, 35.9%) | 785        | 285   | 36.3% | (33.0%, 39.7%) | 3,985  | 1,175 | 29.5% | (28.1%, 30.9%) | 405     | 120 | 29.6% | (25.4%, 34.3%) | 10,140      | 2,610  | 25.7% | (24.9%, 26.6%) |     |  |
|                       | <b>75-84</b>   | 360         | 165 | 45.8% | (40.8%, 51.0%) | 690        | 305   | 44.2% | (40.5%, 47.9%) | 3,645  | 1,255 | 34.4% | (32.9%, 36.0%) | 265     | 95  | 35.8% | (30.3%, 41.8%) | 8,845       | 2,855  | 32.3% | (31.3%, 33.3%) |     |  |
|                       | <b>85+</b>     | 165         | 100 | 60.6% | (53.0%, 67.7%) | 385        | 210   | 54.5% | (49.6%, 59.4%) | 1,400  | 670   | 47.9% | (45.2%, 50.5%) | 140     | 85  | 60.7% | (52.4%, 68.4%) | 3,950       | 1,960  | 49.6% | (48.1%, 51.2%) |     |  |
| <b>Stage</b>          | <b>1</b>       | ...         | ... | ...   | ...            | ...        | ...   | ...   | ...            | 2,035  | 210   | 10.3% | (9.1%, 11.7%)  | ...     | ... | ...   | ...            | 4,500       | 425    | 9.4%  | (8.6%, 10.3%)  |     |  |
|                       | <b>2</b>       | ...         | ... | ...   | ...            | ...        | ...   | ...   | ...            | 940    | 145   | 15.4% | (13.3%, 17.9%) | ...     | ... | ...   | ...            | 3,810       | 835    | 21.9% | (20.6%, 23.3%) |     |  |
|                       | <b>3</b>       | ...         | ... | ...   | ...            | ...        | ...   | ...   | ...            | 2,500  | 645   | 25.8% | (24.1%, 27.6%) | ...     | ... | ...   | ...            | 5,880       | 1,380  | 23.5% | (22.4%, 24.6%) |     |  |
|                       | <b>4</b>       | ...         | ... | ...   | ...            | ...        | ...   | ...   | ...            | 6,165  | 2,810 | 45.6% | (44.3%, 46.8%) | ...     | ... | ...   | ...            | 8,505       | 3,715  | 43.7% | (42.6%, 44.7%) |     |  |
|                       | <b>Unknown</b> | 1,760       | 665 | 37.8% | (35.5%, 40.1%) | 2,615      | 1,085 | 41.5% | (39.6%, 43.4%) | 680    | 270   | 39.7% | (36.1%, 43.4%) | 1,615   | 510 | 31.6% | (29.4%, 33.9%) | 10,965      | 3,870  | 35.3% | (34.4%, 36.2%) |     |  |



| Ontario               |                | Oesophageal |       |       |                | Stomach    |       |       |                | Colon  |       |       |                | Rectal  |       |       |                |             |        |       |                |
|-----------------------|----------------|-------------|-------|-------|----------------|------------|-------|-------|----------------|--------|-------|-------|----------------|---------|-------|-------|----------------|-------------|--------|-------|----------------|
|                       |                | All         | EP    | %EP   | 95% CI         | All        | EP    | %EP   | 95% CI         | All    | EP    | %EP   | 95% CI         | All     | EP    | %EP   | 95% CI         |             |        |       |                |
| <b>Total</b>          |                | 3,099       | 630   | 20.3% | (18.9%, 21.8%) | 6,465      | 1,738 | 26.9% | (25.8%, 28.0%) | 24,481 | 6,653 | 27.2% | (26.6%, 27.7%) | 7,845   | 860   | 11.0% | (10.3%, 11.7%) |             |        |       |                |
| <b>Sex</b>            | <b>Male</b>    | 2,355       | 450   | 19.1% | (17.6%, 20.7%) | 4,065      | 1,089 | 26.8% | (25.5%, 28.2%) | 12,795 | 3,298 | 25.8% | (25.0%, 26.5%) | 4,819   | 517   | 10.7% | (9.9%, 11.6%)  |             |        |       |                |
|                       | <b>Female</b>  | 744         | 180   | 24.2% | (21.3%, 27.4%) | 2,400      | 649   | 27.0% | (25.3%, 28.9%) | 11,686 | 3,355 | 28.7% | (27.9%, 29.5%) | 3,026   | 343   | 11.3% | (10.3%, 12.5%) |             |        |       |                |
| <b>Diagnosis year</b> | <b>2012</b>    | 624         | 121   | 19.4% | (16.5%, 22.7%) | 1,199      | 316   | 26.4% | (23.9%, 28.9%) | 4,984  | 1,271 | 25.5% | (24.3%, 26.7%) | 1,549   | 193   | 12.5% | (10.9%, 14.2%) |             |        |       |                |
|                       | <b>2013</b>    | 616         | 130   | 21.1% | (18.1%, 24.5%) | 1,299      | 339   | 26.1% | (23.8%, 28.6%) | 4,809  | 1,281 | 26.6% | (25.4%, 27.9%) | 1,542   | 175   | 11.3% | (9.9%, 13%)    |             |        |       |                |
|                       | <b>2014</b>    | 570         | 117   | 20.5% | (17.4%, 24.0%) | 1,260      | 362   | 28.7% | (26.3%, 31.3%) | 4,913  | 1,336 | 27.2% | (26.0%, 28.5%) | 1,578   | 170   | 10.8% | (9.3%, 12.4%)  |             |        |       |                |
|                       | <b>2015</b>    | 650         | 135   | 20.8% | (17.8%, 24.1%) | 1,348      | 354   | 26.3% | (24.0%, 28.7%) | 4,985  | 1,444 | 29.0% | (27.7%, 30.2%) | 1,547   | 148   | 9.6%  | (8.2%, 11.1%)  |             |        |       |                |
|                       | <b>2016</b>    | 639         | 127   | 19.9% | (17.0%, 23.1%) | 1,359      | 367   | 27.0% | (24.7%, 29.4%) | 4,790  | 1,321 | 27.6% | (26.3%, 28.9%) | 1,629   | 174   | 10.7% | (9.3%, 12.3%)  |             |        |       |                |
| <b>Age group</b>      | <b>15-64</b>   | 1,222       | 210   | 17.2% | (15.2%, 19.4%) | 2,301      | 456   | 19.8% | (18.2%, 21.5%) | 8,441  | 1,993 | 23.6% | (22.7%, 24.5%) | 3,664   | 241   | 6.6%  | (5.8%, 7.4%)   |             |        |       |                |
|                       | <b>65-74</b>   | 920         | 146   | 15.9% | (13.7%, 18.4%) | 1,714      | 366   | 21.4% | (19.5%, 23.4%) | 6,558  | 1,347 | 20.5% | (19.6%, 21.5%) | 2,061   | 232   | 11.3% | (10%, 12.7%)   |             |        |       |                |
|                       | <b>75-84</b>   | 677         | 175   | 25.8% | (22.7%, 29.3%) | 1,662      | 527   | 31.7% | (29.5%, 34.0%) | 6,490  | 1,912 | 29.5% | (28.4%, 30.6%) | 1,496   | 224   | 15.0% | (13.3%, 16.9%) |             |        |       |                |
|                       | <b>85+</b>     | 280         | 99    | 35.4% | (30.0%, 41.1%) | 788        | 389   | 49.4% | (45.9%, 52.9%) | 2,992  | 1,401 | 46.8% | (45.0%, 48.6%) | 624     | 163   | 26.1% | (22.8%, 29.7%) |             |        |       |                |
| <b>Stage</b>          | <b>1</b>       | 144         | 20    | 13.9% | (9.2%, 20.5%)  | 484        | 70    | 14.5% | (11.6%, 17.9%) | 5,272  | 815   | 15.5% | (14.5%, 16.5%) | 2,115   | 122   | 5.8%  | (4.9%, 6.8%)   |             |        |       |                |
|                       | <b>2</b>       | 274         | 42    | 15.3% | (11.5%, 20.1%) | 498        | 79    | 15.9% | (12.9%, 19.3%) | 6,561  | 1,877 | 28.6% | (27.5%, 29.7%) | 1,369   | 153   | 11.2% | (9.6%, 13.0%)  |             |        |       |                |
|                       | <b>3</b>       | 476         | 58    | 12.2% | (9.5%, 15.4%)  | 543        | 137   | 25.2% | (21.8%, 29.0%) | 6,590  | 1,827 | 27.7% | (26.7%, 28.8%) | 2,489   | 233   | 9.4%  | (8.3%, 10.6%)  |             |        |       |                |
|                       | <b>4</b>       | 748         | 161   | 21.5% | (18.7%, 24.6%) | 1,135      | 310   | 27.3% | (24.8%, 30.0%) | 4,373  | 1,745 | 39.9% | (38.5%, 41.4%) | 1,130   | 261   | 23.1% | (20.7%, 25.6%) |             |        |       |                |
|                       | <b>Unknown</b> | 1,457       | 349   | 24.0% | (21.8%, 26.2%) | 3,805      | 1,142 | 30.0% | (28.6%, 31.5%) | 1,685  | 389   | 23.1% | (21.1%, 25.2%) | 742     | 91    | 12.3% | (10.1%, 14.8%) |             |        |       |                |
|                       |                | Liver       |       |       |                | Pancreatic |       |       |                | Lung   |       |       |                | Ovarian |       |       |                | All cancers |        |       |                |
|                       |                | All         | EP    | %EP   | 95% CI         | All        | EP    | %EP   | 95% CI         | All    | EP    | %EP   | 95% CI         | All     | EP    | %EP   | 95% CI         | All         | EP     | %EP   | 95% CI         |
| <b>Total</b>          |                | 4,129       | 1,167 | 28.3% | (26.9%, 29.7%) | 6,456      | 2,279 | 35.3% | (34.1%, 36.5%) | 35,092 | 9,640 | 27.5% | (27.0%, 27.9%) | 4,880   | 1,164 | 23.9% | (22.7%, 25.1%) | 92,447      | 24,131 | 26.1% | (25.8%, 26.4%) |
| <b>Sex</b>            | <b>Male</b>    | 2,946       | 828   | 28.1% | (26.5%, 29.8%) | 3,473      | 1,221 | 35.2% | (33.6%, 36.8%) | 17,693 | 5,031 | 28.4% | (27.8%, 29.1%) |         |       |       |                | 48,146      | 12,434 | 25.8% | (25.4%, 26.2%) |
|                       | <b>Female</b>  | 1,183       | 339   | 28.7% | (26.2%, 31.3%) | 2,983      | 1,058 | 35.5% | (33.8%, 37.2%) | 17,399 | 4,609 | 26.5% | (25.8%, 27.2%) | 4,880   | 1,164 | 23.9% | (22.7%, 25.1%) | 44,301      | 11,697 | 26.4% | (26.0%, 26.8%) |
| <b>Diagnosis year</b> | <b>2012</b>    | 710         | 196   | 27.6% | (24.4%, 31.0%) | 1,242      | 437   | 35.2% | (32.6%, 37.9%) | 6,849  | 1,813 | 26.5% | (25.4%, 27.5%) | 933     | 234   | 25.1% | (22.4%, 28.0%) | 18,090      | 4,581  | 25.3% | (24.7%, 26.0%) |
|                       | <b>2013</b>    | 761         | 200   | 26.3% | (23.3%, 29.5%) | 1,227      | 387   | 31.5% | (29.0%, 34.2%) | 6,728  | 1,823 | 27.1% | (26.0%, 28.2%) | 996     | 222   | 22.3% | (19.8%, 25.0%) | 17,978      | 4,557  | 25.3% | (24.7%, 26.0%) |
|                       | <b>2014</b>    | 900         | 251   | 27.9% | (25.1%, 30.9%) | 1,241      | 420   | 33.8% | (31.3%, 36.5%) | 7,071  | 2,019 | 28.6% | (27.5%, 29.6%) | 980     | 240   | 24.5% | (21.9%, 27.3%) | 18,513      | 4,915  | 26.5% | (25.9%, 27.2%) |
|                       | <b>2015</b>    | 898         | 269   | 30.0% | (27.1%, 33.0%) | 1,340      | 529   | 39.5% | (36.9%, 42.1%) | 7,099  | 1,967 | 27.7% | (26.7%, 28.8%) | 992     | 247   | 24.9% | (22.3%, 27.7%) | 18,859      | 5,093  | 27.0% | (26.4%, 27.6%) |
|                       | <b>2016</b>    | 860         | 251   | 29.2% | (26.2%, 32.3%) | 1,406      | 506   | 36.0% | (33.5%, 38.5%) | 7,345  | 2,018 | 27.5% | (26.5%, 28.5%) | 979     | 221   | 22.6% | (20.1%, 25.3%) | 19,007      | 4,985  | 26.2% | (25.6%, 26.9%) |
| <b>Age group</b>      | <b>15-64</b>   | 1,804       | 449   | 24.9% | (22.9%, 26.9%) | 2,394      | 769   | 32.1% | (30.3%, 34.0%) | 10,741 | 2,733 | 25.4% | (24.6%, 26.3%) | 2,610   | 442   | 16.9% | (15.5%, 18.4%) | 33,177      | 7,293  | 22.0% | (21.5%, 22.4%) |
|                       | <b>65-74</b>   | 1,204       | 356   | 29.6% | (27.1%, 32.2%) | 2,091      | 725   | 34.7% | (32.7%, 36.7%) | 12,271 | 3,183 | 25.9% | (25.2%, 26.7%) | 1,208   | 288   | 23.8% | (21.5%, 26.3%) | 28,027      | 6,643  | 23.7% | (23.2%, 24.2%) |
|                       | <b>75-84</b>   | 907         | 271   | 29.9% | (27.0%, 32.9%) | 1,591      | 610   | 38.3% | (36.0%, 40.8%) | 9,569  | 2,780 | 29.1% | (28.2%, 30.0%) | 792     | 306   | 38.6% | (35.3%, 42.1%) | 23,184      | 6,805  | 29.4% | (28.8%, 29.9%) |
|                       | <b>85+</b>     | 214         | 91    | 42.5% | (36.1%, 49.2%) | 380        | 175   | 46.1% | (41.1%, 51.1%) | 2,511  | 944   | 37.6% | (35.7%, 39.5%) | 270     | 128   | 47.4% | (41.5%, 53.4%) | 8,059       | 3,390  | 42.1% | (41.0%, 43.1%) |
| <b>Stage</b>          | <b>1</b>       | 421         | 57    | 13.5% | (10.6%, 17.1%) | 337        | 67    | 19.9% | (16.0%, 24.5%) | 7,035  | 687   | 9.8%  | (9.1%, 10.5%)  | 812     | 71    | 8.7%  | (7.0%, 10.9%)  | 16,620      | 1,909  | 11.5% | (11.0%, 12.0%) |
|                       | <b>2</b>       | 452         | 53    | 11.7% | (9.1%, 15.0%)  | 874        | 270   | 30.9% | (27.9%, 34.0%) | 2,780  | 339   | 12.2% | (11%, 13.5%)   | 369     | 45    | 12.2% | (9.2%, 15.9%)  | 13,177      | 2,858  | 21.7% | (21.0%, 22.4%) |
|                       | <b>3</b>       | 529         | 131   | 24.8% | (21.3%, 28.6%) | 532        | 164   | 30.8% | (27.1%, 34.9%) | 6,801  | 1,381 | 20.3% | (19.4%, 21.3%) | 1,516   | 302   | 19.9% | (18.0%, 22.0%) | 19,476      | 4,233  | 21.7% | (21.2%, 22.3%) |
|                       | <b>4</b>       | 572         | 188   | 32.9% | (29.1%, 36.8%) | 2,021      | 628   | 31.1% | (29.1%, 33.1%) | 17,017 | 6,812 | 40.0% | (39.3%, 40.8%) | 583     | 226   | 38.8% | (34.9%, 42.8%) | 27,579      | 10,331 | 37.5% | (36.9%, 38.0%) |
|                       | <b>Unknown</b> | 2,155       | 738   | 34.2% | (32.3%, 36.3%) | 2,692      | 1,150 | 42.7% | (40.9%, 44.6%) | 1,459  | 421   | 28.9% | (26.6%, 31.2%) | 1,600   | 520   | 32.5% | (30.2%, 34.8%) | 15,595      | 4,800  | 30.8% | (30.1%, 31.5%) |

| Saskatchewan-<br>Manitoba \$ |                | Oesophageal |     |       |                | Stomach    |     |       |                | Colon |       |       |                | Rectal  |     |       |                |             |       |       |                |
|------------------------------|----------------|-------------|-----|-------|----------------|------------|-----|-------|----------------|-------|-------|-------|----------------|---------|-----|-------|----------------|-------------|-------|-------|----------------|
|                              |                | All         | EP  | %EP   | 95% CI         | All        | EP  | %EP   | 95% CI         | All   | EP    | %EP   | 95% CI         | All     | EP  | %EP   | 95% CI         |             |       |       |                |
| <b>Total</b>                 |                | 460         | 85  | 18.5% | (15.2%, 22.3%) | 895        | 285 | 31.8% | (28.9%, 35.0%) | 4,470 | 1,240 | 27.7% | (26.4%, 29.1%) | 1,820   | 250 | 13.7% | (12.2%, 15.4%) |             |       |       |                |
| <b>Sex</b>                   | <b>Male</b>    | 345         | 60  | 17.4% | (13.8%, 21.7%) | 595        | 175 | 29.4% | (25.9%, 33.2%) | 2,450 | 645   | 26.3% | (24.6%, 28.1%) | 1,160   | 150 | 12.9% | (11.1%, 15.0%) |             |       |       |                |
|                              | <b>Female</b>  | 110         | 25  | 22.7% | (15.9%, 31.4%) | 300        | 110 | 36.7% | (31.4%, 42.3%) | 2,030 | 595   | 29.3% | (27.4%, 31.3%) | 650     | 95  | 14.6% | (12.1%, 17.5%) |             |       |       |                |
| <b>Diagnosis<br/>year</b>    | <b>2012</b>    | 110         | 15  | 13.6% | (8.4%, 21.3%)  | 230        | 75  | 32.6% | (26.9%, 38.9%) | 1,095 | 300   | 27.4% | (24.8%, 30.1%) | 465     | 65  | 14.0% | (11.1%, 17.4%) |             |       |       |                |
|                              | <b>2013</b>    | 110         | 20  | 18.2% | (12.1%, 26.4%) | 205        | 70  | 34.1% | (28.0%, 40.9%) | 1,190 | 345   | 29.0% | (26.5%, 31.6%) | 455     | 60  | 13.2% | (10.4%, 16.6%) |             |       |       |                |
|                              | <b>2014</b>    | 135         | 30  | 22.2% | (16.0%, 29.9%) | 230        | 75  | 32.6% | (26.9%, 38.9%) | 1,155 | 310   | 26.8% | (24.4%, 29.5%) | 420     | 55  | 13.1% | (10.2%, 16.7%) |             |       |       |                |
|                              | <b>2015</b>    | 105         | 25  | 23.8% | (16.7%, 32.8%) | 230        | 60  | 26.1% | (20.8%, 32.1%) | 1,040 | 295   | 28.4% | (25.7%, 31.2%) | 475     | 65  | 13.7% | (10.9%, 17.1%) |             |       |       |                |
|                              | <b>2016</b>    | ...         | ... | ...   | ...            | ...        | ... | ...   | ...            | ...   | ...   | ...   | ...            | ...     | ... | ...   | ...            |             |       |       |                |
| <b>Age group</b>             | <b>15-64</b>   | 180         | 25  | 13.9% | (9.6%, 19.7%)  | 305        | 75  | 24.6% | (20.1%, 29.7%) | 1,515 | 365   | 24.1% | (22.0%, 26.3%) | 790     | 75  | 9.5%  | (7.6%, 11.7%)  |             |       |       |                |
|                              | <b>65-74</b>   | 130         | 30  | 23.1% | (16.7%, 31.0%) | 220        | 50  | 22.7% | (17.7%, 28.7%) | 1,175 | 250   | 21.3% | (19.0%, 23.7%) | 500     | 50  | 10.0% | (7.7%, 12.9%)  |             |       |       |                |
|                              | <b>75-84</b>   | 100         | 15  | 15.0% | (9.3%, 23.3%)  | 245        | 90  | 36.7% | (30.9%, 42.9%) | 1,150 | 340   | 29.6% | (27.0%, 32.3%) | 355     | 65  | 18.3% | (14.6%, 22.7%) |             |       |       |                |
|                              | <b>85+</b>     | 45          | 10  | 22.2% | (12.5%, 36.3%) | 125        | 70  | 56.0% | (47.2%, 64.4%) | 635   | 280   | 44.1% | (40.3%, 48.0%) | 175     | 55  | 31.4% | (25.0%, 38.6%) |             |       |       |                |
| <b>Stage</b>                 | <b>1</b>       | 65          | 15  | 23.1% | (14.5%, 34.6%) | 165        | 45  | 27.3% | (21.1%, 34.5%) | 1,065 | 180   | 16.9% | (14.8%, 19.3%) | 425     | 35  | 8.2%  | (6.0%, 11.2%)  |             |       |       |                |
|                              | <b>2</b>       | 55          | 10  | 18.2% | (10.2%, 30.3%) | 130        | 30  | 23.1% | (16.7%, 31.0%) | 1,215 | 325   | 26.8% | (24.3%, 29.3%) | 275     | 45  | 16.4% | (12.5%, 21.2%) |             |       |       |                |
|                              | <b>3</b>       | 100         | 15  | 15.0% | (9.3%, 23.3%)  | 145        | 35  | 24.1% | (17.9%, 31.7%) | 1,055 | 280   | 26.5% | (24.0%, 29.3%) | 635     | 60  | 9.4%  | (7.4%, 12.0%)  |             |       |       |                |
|                              | <b>4</b>       | 185         | 40  | 21.6% | (16.3%, 28.1%) | 330        | 135 | 40.9% | (35.7%, 46.3%) | 905   | 390   | 43.1% | (39.9%, 46.3%) | 365     | 85  | 23.3% | (19.2%, 27.9%) |             |       |       |                |
|                              | <b>Unknown</b> | 50          | 5   | 10.0% | (4.3%, 21.4%)  | 115        | 45  | 39.1% | (30.7%, 48.3%) | 235   | 70    | 29.8% | (24.3%, 35.9%) | 120     | 20  | 16.7% | (11.1%, 24.3%) |             |       |       |                |
|                              |                | Liver       |     |       |                | Pancreatic |     |       |                | Lung  |       |       |                | Ovarian |     |       |                | All cancers |       |       |                |
|                              |                | All         | EP  | %EP   | 95% CI         | All        | EP  | %EP   | 95% CI         | All   | EP    | %EP   | 95% CI         | All     | EP  | %EP   | 95% CI         | All         | EP    | %EP   | 95% CI         |
| <b>Total</b>                 |                | 585         | 195 | 33.3% | (29.6%, 37.3%) | 1,300      | 485 | 37.3% | (34.7%, 40.0%) | 6,395 | 1,955 | 30.6% | (29.5%, 31.7%) | 730     | 220 | 30.1% | (26.9%, 33.6%) | 16,655      | 4,715 | 28.3% | (27.6%, 29.0%) |
| <b>Sex</b>                   | <b>Male</b>    | 390         | 110 | 28.2% | (24.0%, 32.9%) | 670        | 230 | 34.3% | (30.8%, 38.0%) | 3,170 | 1,005 | 31.7% | (30.1%, 33.3%) |         |     |       |                | 8,780       | 2,375 | 27.1% | (26.1%, 28%)   |
|                              | <b>Female</b>  | 200         | 75  | 37.5% | (31.1%, 44.4%) | 635        | 260 | 40.9% | (37.2%, 44.8%) | 3,220 | 950   | 29.5% | (28.0%, 31.1%) | 730     | 220 | 30.1% | (26.9%, 33.6%) | 7,875       | 2,330 | 29.6% | (28.6%, 30.6%) |
| <b>Diagnosis<br/>year</b>    | <b>2012</b>    | 155         | 60  | 38.7% | (31.4%, 46.6%) | 300        | 115 | 38.3% | (33.0%, 43.9%) | 1,560 | 485   | 31.1% | (28.8%, 33.4%) | 165     | 35  | 21.2% | (15.7%, 28.1%) | 4,080       | 1,150 | 28.2% | (26.8%, 29.6%) |
|                              | <b>2013</b>    | 140         | 50  | 35.7% | (28.3%, 43.9%) | 355        | 135 | 38.0% | (33.1%, 43.2%) | 1,635 | 505   | 30.9% | (28.7%, 33.2%) | 195     | 70  | 35.9% | (29.5%, 42.8%) | 4,285       | 1,255 | 29.3% | (27.9%, 30.7%) |
|                              | <b>2014</b>    | 135         | 45  | 33.3% | (25.9%, 41.6%) | 330        | 115 | 34.8% | (29.9%, 40.1%) | 1,655 | 530   | 32.0% | (29.8%, 34.3%) | 190     | 60  | 31.6% | (25.4%, 38.5%) | 4,250       | 1,220 | 28.7% | (27.4%, 30.1%) |
|                              | <b>2015</b>    | 155         | 40  | 25.8% | (19.6%, 33.2%) | 310        | 130 | 41.9% | (36.6%, 47.5%) | 1,545 | 440   | 28.5% | (26.3%, 30.8%) | 185     | 50  | 27.0% | (21.1%, 33.8%) | 4,045       | 1,105 | 27.3% | (26.0%, 28.7%) |
|                              | <b>2016</b>    | ...         | ... | ...   | ...            | ...        | ... | ...   | ...            | ...   | ...   | ...   | ...            | ...     | ... | ...   | ...            | ...         | ...   | ...   |                |
| <b>Age group</b>             | <b>15-64</b>   | 260         | 75  | 28.8% | (23.7%, 34.6%) | 385        | 135 | 35.1% | (30.5%, 40.0%) | 1,710 | 430   | 25.2% | (23.1%, 27.3%) | 400     | 95  | 23.8% | (19.8%, 28.2%) | 5,545       | 1,275 | 23.0% | (21.9%, 24.1%) |
|                              | <b>65-74</b>   | 155         | 45  | 29.0% | (22.5%, 36.6%) | 380        | 130 | 34.2% | (29.6%, 39.1%) | 2,265 | 675   | 29.8% | (28.0%, 31.7%) | 165     | 45  | 27.3% | (21.1%, 34.5%) | 4,990       | 1,275 | 25.6% | (24.4%, 26.8%) |
|                              | <b>75-84</b>   | 130         | 50  | 38.5% | (30.5%, 47.0%) | 335        | 130 | 38.8% | (33.7%, 44.1%) | 1,785 | 600   | 33.6% | (31.5%, 35.8%) | 115     | 45  | 39.1% | (30.7%, 48.3%) | 4,215       | 1,335 | 31.7% | (30.3%, 33.1%) |
|                              | <b>85+</b>     | 45          | 25  | 55.6% | (41.2%, 69.1%) | 200        | 100 | 50.0% | (43.1%, 56.9%) | 630   | 250   | 39.7% | (35.9%, 43.6%) | 55      | 35  | 63.6% | (50.4%, 75.1%) | 1,910       | 825   | 43.2% | (41.0%, 45.4%) |
| <b>Stage</b>                 | <b>1</b>       | 125         | 30  | 24.0% | (17.4%, 32.2%) | 135        | 40  | 29.6% | (22.6%, 37.8%) | 1,200 | 105   | 8.8%  | (7.3%, 10.5%)  | 160     | 20  | 12.5% | (8.2%, 18.5%)  | 3,340       | 470   | 14.1% | (12.9%, 15.3%) |
|                              | <b>2</b>       | 85          | 15  | 17.6% | (11.0%, 27.1%) | 305        | 100 | 32.8% | (27.8%, 38.2%) | 500   | 70    | 14.0% | (11.2%, 17.3%) | 65      | 15  | 23.1% | (14.5%, 34.6%) | 2,630       | 610   | 23.2% | (21.6%, 24.8%) |
|                              | <b>3</b>       | 90          | 25  | 27.8% | (19.6%, 37.8%) | 95         | 20  | 21.1% | (14.1%, 30.3%) | 1,220 | 290   | 23.8% | (21.5%, 26.2%) | 340     | 100 | 29.4% | (24.8%, 34.5%) | 3,680       | 825   | 22.4% | (21.1%, 23.8%) |
|                              | <b>4</b>       | 115         | 50  | 43.5% | (34.8%, 52.6%) | 715        | 295 | 41.3% | (37.7%, 44.9%) | 3,390 | 1,455 | 42.9% | (41.3%, 44.6%) | 140     | 70  | 50.0% | (41.8%, 58.2%) | 6,145       | 2,520 | 41.0% | (39.8%, 42.2%) |
|                              | <b>Unknown</b> | 180         | 75  | 41.7% | (34.7%, 49.0%) | 60         | 20  | 33.3% | (22.7%, 45.9%) | 85    | 40    | 47.1% | (36.8%, 57.6%) | 25      | 15  | 60.0% | (40.7%, 76.6%) | 870         | 290   | 33.3% | (30.3%, 36.5%) |

| New South Wales       |                                | Oesophageal |       |       |                | Stomach    |       |       |                | Colon  |       |       |                | Rectal  |     |       |                |             |        |       |                |
|-----------------------|--------------------------------|-------------|-------|-------|----------------|------------|-------|-------|----------------|--------|-------|-------|----------------|---------|-----|-------|----------------|-------------|--------|-------|----------------|
|                       |                                | All         | EP    | %EP   | 95% CI         | All        | EP    | %EP   | 95% CI         | All    | EP    | %EP   | 95% CI         | All     | EP  | %EP   | 95% CI         |             |        |       |                |
| <b>Total</b>          |                                | 1,970       | 530   | 26.9% | (25.0%, 28.9%) | 3,179      | 969   | 30.5% | (28.9%, 32.1%) | 16,316 | 4,499 | 27.6% | (26.9%, 28.3%) | 5,459   | 660 | 12.1% | (11.3%, 13.0%) |             |        |       |                |
| <b>Sex</b>            | <b>Male</b>                    | 1,368       | 360   | 26.3% | (24.1%, 28.7%) | 2,083      | 605   | 29.0% | (27.1%, 31.0%) | 8,207  | 2,204 | 26.9% | (25.9%, 27.8%) | 3,421   | 406 | 11.9% | (10.8%, 13.0%) |             |        |       |                |
|                       | <b>Female</b>                  | 602         | 170   | 28.2% | (24.8%, 32.0%) | 1,096      | 364   | 33.2% | (30.5%, 36.1%) | 8,109  | 2,295 | 28.3% | (27.3%, 29.3%) | 2,038   | 254 | 12.5% | (11.1%, 14.0%) |             |        |       |                |
| <b>Diagnosis year</b> | <b>2012</b>                    | 369         | 97    | 26.3% | (22.1%, 31.0%) | 640        | 210   | 32.8% | (29.3%, 36.5%) | 3,278  | 911   | 27.8% | (26.3%, 29.4%) | 1,050   | 139 | 13.2% | (11.3%, 15.4%) |             |        |       |                |
|                       | <b>2013</b>                    | 391         | 101   | 25.8% | (21.7%, 30.4%) | 624        | 179   | 28.7% | (25.3%, 32.4%) | 3,121  | 862   | 27.6% | (26.1%, 29.2%) | 1,052   | 131 | 12.5% | (10.6%, 14.6%) |             |        |       |                |
|                       | <b>2014</b>                    | 438         | 96    | 21.9% | (18.3%, 26.0%) | 634        | 181   | 28.5% | (25.2%, 32.2%) | 3,159  | 878   | 27.8% | (26.3%, 29.4%) | 1,072   | 123 | 11.5% | (9.7%, 13.5%)  |             |        |       |                |
|                       | <b>2015</b>                    | 394         | 118   | 29.9% | (25.6%, 34.6%) | 599        | 175   | 29.2% | (25.7%, 33.0%) | 3,390  | 931   | 27.5% | (26.0%, 29.0%) | 1,084   | 129 | 11.9% | (10.1%, 14%)   |             |        |       |                |
|                       | <b>2016</b>                    | 378         | 118   | 31.2% | (26.8%, 36.1%) | 682        | 224   | 32.8% | (29.4%, 36.5%) | 3,368  | 917   | 27.2% | (25.8%, 28.8%) | 1,201   | 138 | 11.5% | (9.8%, 13.4%)  |             |        |       |                |
| <b>Age group</b>      | <b>15-64</b>                   | 626         | 164   | 26.2% | (22.9%, 29.8%) | 1,112      | 283   | 25.4% | (23.0%, 28.1%) | 4,932  | 1,394 | 28.3% | (27.0%, 29.5%) | 2,384   | 247 | 10.4% | (9.2%, 11.6%)  |             |        |       |                |
|                       | <b>65-74</b>                   | 598         | 120   | 20.1% | (17.1%, 23.5%) | 897        | 209   | 23.3% | (20.7%, 26.2%) | 4,748  | 966   | 20.3% | (19.2%, 21.5%) | 1,570   | 134 | 8.5%  | (7.3%, 10.0%)  |             |        |       |                |
|                       | <b>75-84</b>                   | 500         | 147   | 29.4% | (25.6%, 33.5%) | 790        | 274   | 34.7% | (31.4%, 38.1%) | 4,582  | 1,238 | 27.0% | (25.8%, 28.3%) | 1,097   | 167 | 15.2% | (13.2%, 17.5%) |             |        |       |                |
|                       | <b>85+</b>                     | 246         | 99    | 40.2% | (34.3%, 46.5%) | 380        | 203   | 53.4% | (48.4%, 58.4%) | 2,054  | 901   | 43.9% | (41.7%, 46.0%) | 408     | 112 | 27.5% | (23.3%, 32.0%) |             |        |       |                |
| <b>Stage</b>          | <b>Localised</b>               | 645         | 143   | 22.2% | (19.1%, 25.5%) | 893        | 216   | 24.2% | (21.5%, 27.1%) | 4,905  | 907   | 18.5% | (17.4%, 19.6%) | 1,961   | 152 | 7.8%  | (6.6%, 9.0%)   |             |        |       |                |
|                       | <b>Inv. adjc. tissue/organ</b> | 131         | 32    | 24.4% | (17.9%, 32.4%) | 217        | 67    | 30.9% | (25.1%, 37.3%) | 3,379  | 894   | 26.5% | (25.0%, 28.0%) | 682     | 85  | 12.5% | (10.2%, 15.2%) |             |        |       |                |
|                       | <b>Inv. regional LNs</b>       | 284         | 71    | 25.0% | (20.3%, 30.3%) | 498        | 113   | 22.7% | (19.2%, 26.6%) | 3,690  | 978   | 26.5% | (25.1%, 28.0%) | 1,268   | 129 | 10.2% | (8.6%, 12.0%)  |             |        |       |                |
|                       | <b>Distant metastasis</b>      | 551         | 205   | 37.2% | (33.3%, 41.3%) | 1,004      | 453   | 45.1% | (42.1%, 48.2%) | 3,246  | 1,497 | 46.1% | (44.4%, 47.8%) | 790     | 237 | 30.0% | (26.9%, 33.3%) |             |        |       |                |
|                       | <b>Unknown</b>                 | 359         | 79    | 22.0% | (18.0%, 26.6%) | 567        | 120   | 21.2% | (18.0%, 24.7%) | 1,096  | 223   | 20.4% | (18.1%, 22.8%) | 758     | 57  | 7.5%  | (5.8%, 9.6%)   |             |        |       |                |
|                       |                                | Liver       |       |       |                | Pancreatic |       |       |                | Lung   |       |       |                | Ovarian |     |       |                | All cancers |        |       |                |
|                       |                                | All         | EP    | %EP   | 95% CI         | All        | EP    | %EP   | 95% CI         | All    | EP    | %EP   | 95% CI         | All     | EP  | %EP   | 95% CI         | All         | EP     | %EP   | 95% CI         |
| <b>Total</b>          |                                | 3,155       | 1,161 | 36.8% | (35.1%, 38.5%) | 4,498      | 2,036 | 45.3% | (43.8%, 46.7%) | 16,334 | 5,941 | 36.4% | (35.6%, 37.1%) | 2,287   | 649 | 28.4% | (26.6%, 30.3%) | 53,198      | 16,445 | 30.9% | (30.5%, 31.3%) |
| <b>Sex</b>            | <b>Male</b>                    | 2,329       | 821   | 35.3% | (33.3%, 37.2%) | 2,315      | 1,029 | 44.5% | (42.4%, 46.5%) | 9,314  | 3,500 | 37.6% | (36.6%, 38.6%) |         |     |       |                | 29,037      | 8,925  | 30.7% | (30.2%, 31.3%) |
|                       | <b>Female</b>                  | 826         | 340   | 41.2% | (37.9%, 44.6%) | 2,183      | 1,007 | 46.1% | (44.0%, 48.2%) | 7,020  | 2,441 | 34.8% | (33.7%, 35.9%) | 2,287   | 649 | 28.4% | (26.6%, 30.3%) | 24,161      | 7,520  | 31.1% | (30.5%, 31.7%) |
| <b>Diagnosis year</b> | <b>2012</b>                    | 543         | 187   | 34.4% | (30.6%, 38.5%) | 847        | 373   | 44.0% | (40.7%, 47.4%) | 3,189  | 1,240 | 38.9% | (37.2%, 40.6%) | 445     | 137 | 30.8% | (26.7%, 35.2%) | 10,361      | 3,294  | 31.8% | (30.9%, 32.7%) |
|                       | <b>2013</b>                    | 626         | 235   | 37.5% | (33.8%, 41.4%) | 846        | 357   | 42.2% | (38.9%, 45.6%) | 3,252  | 1,205 | 37.1% | (35.4%, 38.7%) | 456     | 127 | 27.9% | (23.9%, 32.1%) | 10,368      | 3,197  | 30.8% | (30.0%, 31.7%) |
|                       | <b>2014</b>                    | 634         | 234   | 36.9% | (33.2%, 40.7%) | 901        | 391   | 43.4% | (40.2%, 46.7%) | 3,138  | 1,079 | 34.4% | (32.7%, 36.1%) | 456     | 130 | 28.5% | (24.6%, 32.8%) | 10,432      | 3,112  | 29.8% | (29.0%, 30.7%) |
|                       | <b>2015</b>                    | 664         | 248   | 37.3% | (33.8%, 41.1%) | 942        | 446   | 47.3% | (44.2%, 50.5%) | 3,357  | 1,222 | 36.4% | (34.8%, 38.0%) | 473     | 121 | 25.6% | (21.9%, 29.7%) | 10,903      | 3,390  | 31.1% | (30.2%, 32.0%) |
|                       | <b>2016</b>                    | 688         | 257   | 37.4% | (33.8%, 41%)   | 962        | 469   | 48.8% | (45.6%, 51.9%) | 3,398  | 1,195 | 35.2% | (33.6%, 36.8%) | 457     | 134 | 29.3% | (25.3%, 33.7%) | 11,134      | 3,452  | 31.0% | (30.2%, 31.9%) |
| <b>Age group</b>      | <b>15-64</b>                   | 1,492       | 486   | 32.6% | (30.2%, 35%)   | 1,355      | 515   | 38.0% | (35.5%, 40.6%) | 4,769  | 1,591 | 33.4% | (32.0%, 34.7%) | 1,038   | 233 | 22.4% | (20.0%, 25.1%) | 17,708      | 4,913  | 27.7% | (27.1%, 28.4%) |
|                       | <b>65-74</b>                   | 827         | 277   | 33.5% | (30.4%, 36.8%) | 1,310      | 518   | 39.5% | (36.9%, 42.2%) | 5,528  | 1,807 | 32.7% | (31.5%, 33.9%) | 607     | 159 | 26.2% | (22.9%, 29.8%) | 16,085      | 4,190  | 26.0% | (25.4%, 26.7%) |
|                       | <b>75-84</b>                   | 617         | 264   | 42.8% | (38.9%, 46.7%) | 1,235      | 611   | 49.5% | (46.7%, 52.3%) | 4,536  | 1,745 | 38.5% | (37.1%, 39.9%) | 445     | 159 | 35.7% | (31.4%, 40.3%) | 13,802      | 4,605  | 33.4% | (32.6%, 34.2%) |
|                       | <b>85+</b>                     | 219         | 134   | 61.2% | (54.6%, 67.4%) | 598        | 392   | 65.6% | (61.7%, 69.3%) | 1,501  | 798   | 53.2% | (50.6%, 55.7%) | 197     | 98  | 49.7% | (42.8%, 56.7%) | 5,603       | 2,737  | 48.8% | (47.5%, 50.2%) |
| <b>Stage</b>          | <b>Localised</b>               | 1,553       | 470   | 30.3% | (28.0%, 32.6%) | 768        | 319   | 41.5% | (38.1%, 45.1%) | 3,209  | 775   | 24.2% | (22.7%, 25.7%) | 391     | 56  | 14.3% | (11.2%, 18.1%) | 14,325      | 3,038  | 21.2% | (20.5%, 21.9%) |
|                       | <b>Inv. adjc. tissue/organ</b> | 238         | 103   | 43.3% | (37.1%, 49.6%) | 448        | 211   | 47.1% | (42.5%, 51.7%) | 939    | 247   | 26.3% | (23.6%, 29.2%) | 228     | 44  | 19.3% | (14.7%, 24.9%) | 6,262       | 1,683  | 26.9% | (25.8%, 28.0%) |
|                       | <b>Inv. regional LNs</b>       | 100         | 34    | 34.0% | (25.5%, 43.7%) | 480        | 185   | 38.5% | (34.3%, 43.0%) | 2,472  | 571   | 23.1% | (21.5%, 24.8%) | 62      | 7   | 11.3% | (5.6%, 21.5%)  | 8,854       | 2,088  | 23.6% | (22.7%, 24.5%) |
|                       | <b>Distant metastasis</b>      | 556         | 299   | 53.8% | (49.6%, 57.9%) | 2,150      | 1,062 | 49.4% | (47.3%, 51.5%) | 7,435  | 3,772 | 50.7% | (49.6%, 51.9%) | 1,449   | 498 | 34.4% | (32.0%, 36.9%) | 17,181      | 8,023  | 46.7% | (46.0%, 47.4%) |
|                       | <b>Unknown</b>                 | 708         | 255   | 36.0% | (32.6%, 39.6%) | 652        | 259   | 39.7% | (36.0%, 43.5%) | 2,279  | 576   | 25.3% | (23.5%, 27.1%) | 157     | 44  | 28.0% | (21.6%, 35.5%) | 6,576       | 1,613  | 24.5% | (23.5%, 25.6%) |

| Victoria              |                                | Oesophageal |     |       |                | Stomach    |       |       |                | Colon  |       |       |                | Rectal  |     |       |                |             |       |       |                |
|-----------------------|--------------------------------|-------------|-----|-------|----------------|------------|-------|-------|----------------|--------|-------|-------|----------------|---------|-----|-------|----------------|-------------|-------|-------|----------------|
|                       |                                | All         | EP  | %EP   | 95% CI         | All        | EP    | %EP   | 95% CI         | All    | EP    | %EP   | 95% CI         | All     | EP  | %EP   | 95% CI         |             |       |       |                |
| <b>Total</b>          |                                | 1,576       | 315 | 20.0% | (18.1%, 22.0%) | 2,597      | 616   | 23.7% | (22.1%, 25.4%) | 11,747 | 2,689 | 22.9% | (22.1%, 23.7%) | 4,438   | 403 | 9.1%  | (8.3%, 10.0%)  |             |       |       |                |
| <b>Sex</b>            | <b>Male</b>                    | 1,080       | 210 | 19.4% | (17.2%, 21.9%) | 1,701      | 391   | 23.0% | (21.0%, 25.0%) | 5,924  | 1,305 | 22.0% | (21.0%, 23.1%) | 2,760   | 257 | 9.3%  | (8.3%, 10.5%)  |             |       |       |                |
|                       | <b>Female</b>                  | 496         | 105 | 21.2% | (17.8%, 25.0%) | 896        | 225   | 25.1% | (22.4%, 28.1%) | 5,823  | 1,384 | 23.8% | (22.7%, 24.9%) | 1,678   | 146 | 8.7%  | (7.4%, 10.1%)  |             |       |       |                |
| <b>Diagnosis year</b> | <b>2012</b>                    | 298         | 61  | 20.5% | (16.3%, 25.4%) | 522        | 126   | 24.1% | (20.7%, 28.0%) | 2,249  | 486   | 21.6% | (20.0%, 23.4%) | 876     | 87  | 9.9%  | (8.1%, 12.1%)  |             |       |       |                |
|                       | <b>2013</b>                    | 336         | 60  | 17.9% | (14.1%, 22.3%) | 508        | 126   | 24.8% | (21.2%, 28.7%) | 2,279  | 496   | 21.8% | (20.1%, 23.5%) | 886     | 86  | 9.7%  | (7.9%, 11.8%)  |             |       |       |                |
|                       | <b>2014</b>                    | 312         | 54  | 17.3% | (13.5%, 21.9%) | 504        | 110   | 21.8% | (18.4%, 25.6%) | 2,349  | 561   | 23.9% | (22.2%, 25.6%) | 837     | 68  | 8.1%  | (6.5%, 10.2%)  |             |       |       |                |
|                       | <b>2015</b>                    | 311         | 65  | 20.9% | (16.8%, 25.8%) | 528        | 127   | 24.1% | (20.6%, 27.9%) | 2,449  | 599   | 24.5% | (22.8%, 26.2%) | 900     | 74  | 8.2%  | (6.6%, 10.2%)  |             |       |       |                |
|                       | <b>2016</b>                    | 319         | 75  | 23.5% | (19.2%, 28.5%) | 535        | 127   | 23.7% | (20.3%, 27.5%) | 2,421  | 547   | 22.6% | (21.0%, 24.3%) | 939     | 88  | 9.4%  | (7.7%, 11.4%)  |             |       |       |                |
| <b>Age group</b>      | <b>15-64</b>                   | 465         | 71  | 15.3% | (12.3%, 18.8%) | 866        | 152   | 17.6% | (15.2%, 20.2%) | 3,647  | 855   | 23.4% | (22.1%, 24.8%) | 1,962   | 137 | 7.0%  | (5.9%, 8.2%)   |             |       |       |                |
|                       | <b>65-74</b>                   | 477         | 83  | 17.4% | (14.3%, 21.1%) | 702        | 148   | 21.1% | (18.2%, 24.3%) | 3,152  | 517   | 16.4% | (15.2%, 17.7%) | 1,207   | 94  | 7.8%  | (6.4%, 9.4%)   |             |       |       |                |
|                       | <b>75-84</b>                   | 421         | 92  | 21.9% | (18.2%, 26.0%) | 705        | 186   | 26.4% | (23.3%, 29.8%) | 3,346  | 770   | 23.0% | (21.6%, 24.5%) | 895     | 100 | 11.2% | (9.3%, 13.4%)  |             |       |       |                |
|                       | <b>85+</b>                     | 213         | 69  | 32.4% | (26.5%, 38.9%) | 324        | 130   | 40.1% | (34.9%, 45.5%) | 1,602  | 547   | 34.1% | (31.9%, 36.5%) | 374     | 72  | 19.3% | (15.6%, 23.6%) |             |       |       |                |
| <b>Stage*</b>         | <b>Localised</b>               | ...         | ... | ...   | ...            | ...        | ...   | ...   | ...            | 2,368  | 156   | 6.6%  | (5.7%, 7.7%)   | 1,219   | 37  | 3.0%  | (2.2%, 4.2%)   |             |       |       |                |
|                       | <b>Inv. adjc. tissue/organ</b> | ...         | ... | ...   | ...            | ...        | ...   | ...   | ...            | 3,254  | 644   | 19.8% | (18.5%, 21.2%) | 757     | 66  | 8.7%  | (6.9%, 10.9%)  |             |       |       |                |
|                       | <b>Inv. regional LNs</b>       | ...         | ... | ...   | ...            | ...        | ...   | ...   | ...            | 2,811  | 637   | 22.7% | (21.2%, 24.2%) | 897     | 67  | 7.5%  | (5.9%, 9.4%)   |             |       |       |                |
|                       | <b>Distant metastasis</b>      | ...         | ... | ...   | ...            | ...        | ...   | ...   | ...            | 2,111  | 766   | 36.3% | (34.3%, 38.4%) | 616     | 137 | 22.2% | (19.1%, 25.7%) |             |       |       |                |
|                       | <b>Unknown</b>                 | 1,576       | 315 | 20.0% | (18.1%, 22.0%) | 2,597      | 616   | 23.7% | (22.1%, 25.4%) | 1,185  | 484   | 40.8% | (38.1%, 43.7%) | 934     | 94  | 10.1% | (8.3%, 12.2%)  |             |       |       |                |
|                       |                                | Liver       |     |       |                | Pancreatic |       |       |                | Lung   |       |       |                | Ovarian |     |       |                | All cancers |       |       |                |
|                       |                                | All         | EP  | %EP   | 95% CI         | All        | EP    | %EP   | 95% CI         | All    | EP    | %EP   | 95% CI         | All     | EP  | %EP   | 95% CI         | All         | EP    | %EP   | 95% CI         |
| <b>Total</b>          |                                | 2,323       | 742 | 31.9% | (30.1%, 33.9%) | 3,172      | 1,083 | 34.1% | (32.5%, 35.8%) | 10,620 | 2,954 | 27.8% | (27.0%, 28.7%) | 1,739   | 363 | 20.9% | (19.0%, 22.8%) | 38,212      | 9,165 | 24.0% | (23.6%, 24.4%) |
| <b>Sex</b>            | <b>Male</b>                    | 1,669       | 517 | 31.0% | (28.8%, 33.2%) | 1,619      | 564   | 34.8% | (32.6%, 37.2%) | 5,967  | 1,736 | 29.1% | (28.0%, 30.3%) | ...     | ... | ...   | ...            | 20,720      | 4,980 | 24.0% | (23.5%, 24.6%) |
|                       | <b>Female</b>                  | 654         | 225 | 34.4% | (30.9%, 38.1%) | 1,553      | 519   | 33.4% | (31.1%, 35.8%) | 4,653  | 1,218 | 26.2% | (24.9%, 27.5%) | 1,739   | 363 | 20.9% | (19.0%, 22.8%) | 17,492      | 4,185 | 23.9% | (23.3%, 24.6%) |
| <b>Diagnosis year</b> | <b>2012</b>                    | 363         | 130 | 35.8% | (31.1%, 40.9%) | 530        | 167   | 31.5% | (27.7%, 35.6%) | 1,872  | 490   | 26.2% | (24.2%, 28.2%) | 335     | 68  | 20.3% | (16.3%, 24.9%) | 7,045       | 1,615 | 22.9% | (22.0%, 23.9%) |
|                       | <b>2013</b>                    | 453         | 127 | 28.0% | (24.1%, 32.3%) | 539        | 177   | 32.8% | (29.0%, 36.9%) | 1,895  | 491   | 25.9% | (24.0%, 27.9%) | 336     | 75  | 22.3% | (18.2%, 27.1%) | 7,232       | 1,638 | 22.6% | (21.7%, 23.6%) |
|                       | <b>2014</b>                    | 483         | 149 | 30.8% | (26.9%, 35.1%) | 644        | 213   | 33.1% | (29.6%, 36.8%) | 2,170  | 605   | 27.9% | (26.0%, 29.8%) | 347     | 72  | 20.7% | (16.8%, 25.3%) | 7,646       | 1,832 | 24.0% | (23.0%, 24.9%) |
|                       | <b>2015</b>                    | 506         | 163 | 32.2% | (28.3%, 36.4%) | 706        | 238   | 33.7% | (30.3%, 37.3%) | 2,229  | 669   | 30.0% | (28.1%, 31.9%) | 332     | 63  | 19.0% | (15.1%, 23.5%) | 7,961       | 1,998 | 25.1% | (24.2%, 26.1%) |
|                       | <b>2016</b>                    | 518         | 173 | 33.4% | (29.5%, 37.6%) | 753        | 288   | 38.2% | (34.8%, 41.8%) | 2,454  | 699   | 28.5% | (26.7%, 30.3%) | 389     | 85  | 21.9% | (18.0%, 26.2%) | 8,328       | 2,082 | 25.0% | (24.1%, 25.9%) |
| <b>Age group</b>      | <b>15-64</b>                   | 1,003       | 280 | 27.9% | (25.2%, 30.8%) | 882        | 256   | 29.0% | (26.1%, 32.1%) | 2,851  | 721   | 25.3% | (23.7%, 26.9%) | 892     | 146 | 16.4% | (14.1%, 18.9%) | 12,568      | 2,618 | 20.8% | (20.1%, 21.5%) |
|                       | <b>65-74</b>                   | 582         | 178 | 30.6% | (27.0%, 34.4%) | 927        | 263   | 28.4% | (25.6%, 31.4%) | 3,527  | 871   | 24.7% | (23.3%, 26.1%) | 442     | 72  | 16.3% | (13.1%, 20.0%) | 11,016      | 2,226 | 20.2% | (19.5%, 21.0%) |
|                       | <b>75-84</b>                   | 550         | 182 | 33.1% | (29.3%, 37.1%) | 865        | 321   | 37.1% | (34.0%, 40.4%) | 3,111  | 911   | 29.3% | (27.7%, 30.9%) | 295     | 91  | 30.8% | (25.9%, 36.3%) | 10,188      | 2,653 | 26.0% | (25.2%, 26.9%) |
|                       | <b>85+</b>                     | 188         | 102 | 54.3% | (47.1%, 61.2%) | 498        | 243   | 48.8% | (44.4%, 53.2%) | 1,131  | 451   | 39.9% | (37.1%, 42.8%) | 110     | 54  | 49.1% | (39.9%, 58.3%) | 4,440       | 1,668 | 37.6% | (36.2%, 39.0%) |
| <b>Stage*</b>         | <b>Localised</b>               | ...         | ... | ...   | ...            | ...        | ...   | ...   | ...            | ...    | ...   | ...   | ...            | ...     | ... | ...   | ...            | 3,587       | 193   | 5.4%  | (4.7%, 6.2%)   |
|                       | <b>Inv. adjc. tissue/organ</b> | ...         | ... | ...   | ...            | ...        | ...   | ...   | ...            | ...    | ...   | ...   | ...            | ...     | ... | ...   | ...            | 4,011       | 710   | 17.7% | (16.6%, 18.9%) |
|                       | <b>Inv. regional LNs</b>       | ...         | ... | ...   | ...            | ...        | ...   | ...   | ...            | ...    | ...   | ...   | ...            | ...     | ... | ...   | ...            | 3,708       | 704   | 19.0% | (17.8%, 20.3%) |
|                       | <b>Distant metastasis</b>      | ...         | ... | ...   | ...            | ...        | ...   | ...   | ...            | ...    | ...   | ...   | ...            | ...     | ... | ...   | ...            | 2,727       | 903   | 33.1% | (31.4%, 34.9%) |
|                       | <b>Unknown</b>                 | 2,323       | 742 | 31.9% | (30.1%, 33.9%) | 3,172      | 1,083 | 34.1% | (32.5%, 35.8%) | 10,620 | 2,954 | 27.8% | (27.0%, 28.7%) | 1,739   | 363 | 20.9% | (19.0%, 22.8%) | 24,146      | 6,651 | 27.5% | (27.0%, 28.1%) |

| New Zealand           |                                | Oesophageal |     |       |                | Stomach    |       |       |                | Colon |       |       |                | Rectal  |     |       |                |             |        |       |                |
|-----------------------|--------------------------------|-------------|-----|-------|----------------|------------|-------|-------|----------------|-------|-------|-------|----------------|---------|-----|-------|----------------|-------------|--------|-------|----------------|
|                       |                                | All         | EP  | %EP   | 95% CI         | All        | EP    | %EP   | 95% CI         | All   | EP    | %EP   | 95% CI         | All     | EP  | %EP   | 95% CI         |             |        |       |                |
|                       | <b>Total</b>                   | 1,196       | 440 | 36.8% | (34.1%, 39.6%) | 1,520      | 726   | 47.8% | (45.3%, 50.3%) | 9,502 | 3,480 | 36.6% | (35.7%, 37.6%) | 3,247   | 643 | 19.8% | (18.5%, 21.2%) |             |        |       |                |
| <b>Sex</b>            | <b>Male</b>                    | 834         | 307 | 36.8% | (33.6%, 40.1%) | 949        | 442   | 46.6% | (43.4%, 49.8%) | 4,629 | 1,662 | 35.9% | (34.5%, 37.3%) | 2,034   | 394 | 19.4% | (17.7%, 21.1%) |             |        |       |                |
|                       | <b>Female</b>                  | 362         | 133 | 36.7% | (31.9%, 41.8%) | 571        | 284   | 49.7% | (45.7%, 53.8%) | 4,873 | 1,818 | 37.3% | (36.0%, 38.7%) | 1,213   | 249 | 20.5% | (18.3%, 22.9%) |             |        |       |                |
| <b>Diagnosis year</b> | <b>2012</b>                    | 305         | 107 | 35.1% | (29.9%, 40.6%) | 377        | 170   | 45.1% | (40.1%, 50.1%) | 2,312 | 832   | 36.0% | (34.1%, 38.0%) | 786     | 159 | 20.2% | (17.6%, 23.2%) |             |        |       |                |
|                       | <b>2013</b>                    | 312         | 120 | 38.5% | (33.2%, 44.0%) | 370        | 184   | 49.7% | (44.7%, 54.8%) | 2,363 | 853   | 36.1% | (34.2%, 38.1%) | 786     | 167 | 21.2% | (18.5%, 24.2%) |             |        |       |                |
|                       | <b>2014</b>                    | 273         | 100 | 36.6% | (31.1%, 42.5%) | 391        | 193   | 49.4% | (44.4%, 54.3%) | 2,452 | 889   | 36.3% | (34.4%, 38.2%) | 876     | 155 | 17.7% | (15.3%, 20.4%) |             |        |       |                |
|                       | <b>2015</b>                    | 306         | 113 | 36.9% | (31.7%, 42.5%) | 382        | 179   | 46.9% | (41.9%, 51.9%) | 2,375 | 906   | 38.1% | (36.2%, 40.1%) | 799     | 162 | 20.3% | (17.6%, 23.2%) |             |        |       |                |
|                       | <b>2016</b>                    |             |     |       |                |            |       |       |                |       |       |       |                |         |     |       |                |             |        |       |                |
| <b>Age group</b>      | <b>15-64</b>                   | 328         | 100 | 30.5% | (25.8%, 35.7%) | 562        | 250   | 44.5% | (40.4%, 48.6%) | 2,314 | 882   | 38.1% | (36.2%, 40.1%) | 1,229   | 212 | 17.3% | (15.2%, 19.5%) |             |        |       |                |
|                       | <b>65-74</b>                   | 372         | 121 | 32.5% | (28.0%, 37.4%) | 413        | 173   | 41.9% | (37.2%, 46.7%) | 2,776 | 878   | 31.6% | (29.9%, 33.4%) | 996     | 158 | 15.9% | (13.7%, 18.3%) |             |        |       |                |
|                       | <b>75-84</b>                   | 325         | 133 | 40.9% | (35.7%, 46.3%) | 381        | 203   | 53.3% | (48.3%, 58.2%) | 3,089 | 1,095 | 35.5% | (33.8%, 37.2%) | 734     | 165 | 22.5% | (19.6%, 25.6%) |             |        |       |                |
|                       | <b>85+</b>                     | 171         | 86  | 50.3% | (42.9%, 57.7%) | 164        | 100   | 61.0% | (53.3%, 68.1%) | 1,323 | 625   | 47.2% | (44.6%, 49.9%) | 288     | 108 | 37.5% | (32.1%, 43.2%) |             |        |       |                |
| <b>Stage</b>          | <b>Localised</b>               | 29          | 5   | 17.2% | (7.6%, 34.5%)  | 127        | 28    | 22.0% | (15.7%, 30.0%) | 2,193 | 417   | 19.0% | (17.4%, 20.7%) | 588     | 48  | 8.2%  | (6.2%, 10.7%)  |             |        |       |                |
|                       | <b>Inv. adjc. tissue/organ</b> | 6           | 1   | 16.7% | (3.0%, 56.4%)  | 30         | 15    | 50.0% | (33.2%, 66.8%) | 1,565 | 540   | 34.5% | (32.2%, 36.9%) | 208     | 42  | 20.2% | (15.3%, 26.2%) |             |        |       |                |
|                       | <b>Inv. regional LNs</b>       | 84          | 30  | 35.7% | (26.3%, 46.4%) | 141        | 60    | 42.6% | (34.7%, 50.8%) | 2,348 | 846   | 36.0% | (34.1%, 38.0%) | 526     | 89  | 16.9% | (14.0%, 20.4%) |             |        |       |                |
|                       | <b>Distant metastasis</b>      | 313         | 150 | 47.9% | (42.4%, 53.4%) | 533        | 338   | 63.4% | (59.2%, 67.4%) | 2,199 | 1,269 | 57.7% | (55.6%, 59.8%) | 484     | 210 | 43.4% | (39.0%, 47.8%) |             |        |       |                |
|                       | <b>Unknown</b>                 | 764         | 254 | 33.2% | (30.0%, 36.7%) | 689        | 285   | 41.4% | (37.7%, 45.1%) | 1,197 | 408   | 34.1% | (31.5%, 36.8%) | 1,441   | 254 | 17.6% | (15.7%, 19.7%) |             |        |       |                |
|                       |                                | Liver       |     |       |                | Pancreatic |       |       |                | Lung  |       |       |                | Ovarian |     |       |                | All cancers |        |       |                |
|                       |                                | All         | EP  | %EP   | 95% CI         | All        | EP    | %EP   | 95% CI         | All   | EP    | %EP   | 95% CI         | All     | EP  | %EP   | 95% CI         | All         | EP     | %EP   | 95% CI         |
|                       | <b>Total</b>                   | 1,243       | 618 | 49.7% | (46.9%, 52.5%) | 2,182      | 1,317 | 60.4% | (58.3%, 62.4%) | 8,481 | 4,330 | 51.1% | (50.0%, 52.1%) | 1,423   | 684 | 48.1% | (45.5%, 50.7%) | 28,794      | 12,238 | 42.5% | (41.9%, 43.1%) |
| <b>Sex</b>            | <b>Male</b>                    | 876         | 417 | 47.6% | (44.3%, 50.9%) | 1,091      | 679   | 62.2% | (59.3%, 65.1%) | 4,338 | 2,263 | 52.2% | (50.7%, 53.7%) | 317     | 157 | 49.5% | (44.1%, 55.0%) | 6,961       | 2,917  | 41.9% | (40.8%, 43.1%) |
|                       | <b>Female</b>                  | 367         | 201 | 54.8% | (49.7%, 59.8%) | 1,091      | 638   | 58.5% | (55.5%, 61.4%) | 4,143 | 2,067 | 49.9% | (48.4%, 51.4%) | 1,423   | 684 | 48.1% | (45.5%, 50.7%) | 14,751      | 6,164  | 41.8% | (41.0%, 42.6%) |
| <b>Diagnosis year</b> | <b>2012</b>                    | 293         | 130 | 44.4% | (38.8%, 50.1%) | 538        | 327   | 60.8% | (56.6%, 64.8%) | 2,033 | 1,035 | 50.9% | (48.7%, 53.1%) | 317     | 157 | 49.5% | (44.1%, 55.0%) | 6,961       | 2,917  | 41.9% | (40.8%, 43.1%) |
|                       | <b>2013</b>                    | 273         | 140 | 51.3% | (45.4%, 57.2%) | 505        | 305   | 60.4% | (56.1%, 64.6%) | 2,025 | 1,066 | 52.6% | (50.5%, 54.8%) | 360     | 174 | 48.3% | (43.2%, 53.5%) | 6,994       | 3,009  | 43.0% | (41.9%, 44.2%) |
|                       | <b>2014</b>                    | 332         | 163 | 49.1% | (43.8%, 54.5%) | 555        | 333   | 60.0% | (55.9%, 64.0%) | 2,216 | 1,123 | 50.7% | (48.6%, 52.8%) | 352     | 166 | 47.2% | (42.0%, 52.4%) | 7,447       | 3,122  | 41.9% | (40.8%, 43.0%) |
|                       | <b>2015</b>                    | 345         | 185 | 53.6% | (48.3%, 58.8%) | 584        | 352   | 60.3% | (56.3%, 64.2%) | 2,207 | 1,106 | 50.1% | (48.0%, 52.2%) | 394     | 187 | 47.5% | (42.6%, 52.4%) | 7,392       | 3,190  | 43.2% | (42.0%, 44.3%) |
|                       | <b>2016</b>                    |             |     |       |                |            |       |       |                |       |       |       |                |         |     |       |                |             |        |       |                |
| <b>Age group</b>      | <b>15-64</b>                   | 575         | 268 | 46.6% | (42.6%, 50.7%) | 625        | 351   | 56.2% | (52.2%, 60.0%) | 2,528 | 1,275 | 50.4% | (48.5%, 52.4%) | 658     | 284 | 43.2% | (39.4%, 47.0%) | 8,819       | 3,622  | 41.1% | (40.0%, 42.1%) |
|                       | <b>65-74</b>                   | 331         | 154 | 46.5% | (41.2%, 51.9%) | 637        | 396   | 62.2% | (58.3%, 65.8%) | 2,890 | 1,383 | 47.9% | (46.0%, 49.7%) | 370     | 189 | 51.1% | (46.0%, 56.1%) | 8,785       | 3,452  | 39.3% | (38.3%, 40.3%) |
|                       | <b>75-84</b>                   | 242         | 139 | 57.4% | (51.1%, 63.5%) | 595        | 374   | 62.9% | (58.9%, 66.6%) | 2,265 | 1,186 | 52.4% | (50.3%, 54.4%) | 256     | 131 | 51.2% | (45.1%, 57.2%) | 7,887       | 3,426  | 43.4% | (42.3%, 44.5%) |
|                       | <b>85+</b>                     | 95          | 57  | 60.0% | (49.9%, 69.3%) | 325        | 196   | 60.3% | (54.9%, 65.5%) | 798   | 486   | 60.9% | (57.5%, 64.2%) | 139     | 80  | 57.6% | (49.2%, 65.5%) | 3,303       | 1,738  | 52.6% | (50.9%, 54.3%) |
| <b>Stage</b>          | <b>Localised</b>               | 133         | 38  | 28.6% | (21.6%, 36.8%) | 62         | 11    | 17.7% | (10.2%, 29.0%) | 577   | 73    | 12.7% | (10.2%, 15.6%) | 184     | 41  | 22.3% | (16.9%, 28.8%) | 3,893       | 661    | 17.0% | (15.8%, 18.2%) |
|                       | <b>Inv. adjc. tissue/organ</b> | 22          | 13  | 59.1% | (38.7%, 76.7%) | 45         | 24    | 53.3% | (39.1%, 67.1%) | 337   | 91    | 27.0% | (22.5%, 32.0%) | 208     | 67  | 32.2% | (26.2%, 38.8%) | 2,421       | 793    | 32.8% | (30.9%, 34.7%) |
|                       | <b>Inv. regional LNs</b>       | 25          | 23  | 92.0% | (75.0%, 97.8%) | 138        | 78    | 56.5% | (48.2%, 64.5%) | 922   | 411   | 44.6% | (41.4%, 47.8%) | 29      | 8   | 27.6% | (14.7%, 45.7%) | 4,213       | 1,545  | 36.7% | (35.2%, 38.1%) |
|                       | <b>Distant metastasis</b>      | 298         | 212 | 71.1% | (65.8%, 76.0%) | 1,188      | 786   | 66.2% | (63.4%, 68.8%) | 3,857 | 2,631 | 68.2% | (66.7%, 69.7%) | 894     | 534 | 59.7% | (56.5%, 62.9%) | 9,766       | 6,130  | 62.8% | (61.8%, 63.7%) |
|                       | <b>Unknown</b>                 | 765         | 332 | 43.4% | (39.9%, 46.9%) | 749        | 418   | 55.8% | (52.2%, 59.3%) | 2,788 | 1,124 | 40.3% | (38.5%, 42.1%) | 108     | 34  | 31.5% | (23.5%, 40.7%) | 8,501       | 3,109  | 36.6% | (35.6%, 37.6%) |

All: All patients; EP: Emergency presentations; CI: Confidence Interval; Inv: Invading; Adjc: Adjacent; LNs: Lymph Nodes.

\* Data shown for stage categories in Victoria does not include 33 cases in groups other than shown.

§ For Atlantic Canada, British Columbia, and Saskatchewan-Manitoba, random rounding within cells to a multiple of 5 was used for the tabulated variable groups, to adhere to rules for minimising residual disclosure risk.

**Supplementary Material 7. Associations between emergency presentation (defined as diagnosis of cancer within 30 days after an emergency hospital admission) and sex, age, diagnosis year, stage at diagnosis, and cancer site, by jurisdiction, and odds ratios from crude and adjusted models (including adjustment for stage at diagnosis).**

Odds ratios from adjusted models not including stage at diagnosis shown in Supplementary Material 8.

| Denmark               |                    | All    | EP     | %EP   | 95% CI         | Crude OR | Crude OR (LCI) | Crude OR (UCI) | p(COR)  | Adjusted OR | Adj OR (LCI) | Adj OR (UCI) | p(AOR)  |
|-----------------------|--------------------|--------|--------|-------|----------------|----------|----------------|----------------|---------|-------------|--------------|--------------|---------|
|                       | <b>Total</b>       | 46,003 | 14,199 | 30.9% | (30.4%, 31.3%) |          |                |                |         |             |              |              |         |
| <b>Sex</b>            | <b>Male</b>        | 24,016 | 7,334  | 30.5% | (30.0%, 31.1%) | (ref)    | (ref)          | (ref)          | 0.11    | (ref)       | (ref)        | (ref)        | 0.98    |
|                       | <b>Female</b>      | 21,987 | 6,865  | 31.2% | (30.6%, 31.8%) | 1.03     | 0.99           | 1.07           |         | 1.01        | 0.97         | 1.05         |         |
| <b>Diagnosis year</b> | <b>2014</b>        | 11,354 | 3,750  | 33.0% | (32.2%, 33.9%) | (ref)    | (ref)          | (ref)          | <0.0001 | (ref)       | (ref)        | (ref)        | <0.0001 |
|                       | <b>2015</b>        | 11,423 | 3,535  | 30.9% | (30.1%, 31.8%) | 0.91     | 0.86           | 0.96           |         | 0.92        | 0.87         | 0.98         |         |
|                       | <b>2016</b>        | 11,466 | 3,549  | 31.0% | (30.1%, 31.8%) | 0.91     | 0.86           | 0.96           |         | 0.92        | 0.86         | 0.97         |         |
|                       | <b>2017</b>        | 11,760 | 3,365  | 28.6% | (27.8%, 29.4%) | 0.81     | 0.77           | 0.86           |         | 0.82        | 0.77         | 0.87         |         |
| <b>Age group</b>      | <b>15-64</b>       | 13,131 | 3,468  | 26.4% | (25.7%, 27.2%) | 0.94     | 0.89           | 0.99           | <0.0001 | 0.97        | 0.92         | 1.02         | <0.0001 |
|                       | <b>65-74</b>       | 17,336 | 4,785  | 27.6% | (26.9%, 28.3%) | (ref)    | (ref)          | (ref)          |         | (ref)       | (ref)        | (ref)        |         |
|                       | <b>75-84</b>       | 11,995 | 4,252  | 35.4% | (34.6%, 36.3%) | 1.44     | 1.37           | 1.51           |         | 1.44        | 1.37         | 1.52         |         |
|                       | <b>85+</b>         | 3,541  | 1,694  | 47.8% | (46.2%, 49.5%) | 2.41     | 2.23           | 2.59           |         | 2.46        | 2.27         | 2.66         |         |
| <b>Stage</b>          | <b>1</b>           | 5,977  | 891    | 14.9% | (14.0%, 15.8%) | (ref)    | (ref)          | (ref)          | <0.0001 | (ref)       | (ref)        | (ref)        | <0.0001 |
|                       | <b>2</b>           | 6,064  | 1,329  | 21.9% | (20.9%, 23.0%) | 1.60     | 1.46           | 1.76           |         | 1.46        | 1.33         | 1.61         |         |
|                       | <b>3</b>           | 7,231  | 1,678  | 23.2% | (22.2%, 24.2%) | 1.72     | 1.58           | 1.89           |         | 1.64        | 1.50         | 1.80         |         |
|                       | <b>4</b>           | 15,359 | 6,630  | 43.2% | (42.4%, 44.0%) | 4.34     | 4.01           | 4.69           |         | 3.65        | 3.37         | 3.96         |         |
|                       | <b>Unknown</b>     | 11,372 | 3,671  | 32.3% | (31.4%, 33.1%) | 2.72     | 2.51           | 2.95           |         | 2.72        | 2.50         | 2.96         |         |
| <b>Cancer site</b>    | <b>Oesophageal</b> | 1,896  | 461    | 24.3% | (22.4%, 26.3%) | 0.82     | 0.73           | 0.91           | <0.0001 | 0.75        | 0.67         | 0.84         | <0.0001 |
|                       | <b>Stomach</b>     | 2,231  | 719    | 32.2% | (30.3%, 34.2%) | 1.21     | 1.09           | 1.33           |         | 1.11        | 1.01         | 1.23         |         |
|                       | <b>Colon</b>       | 12,928 | 3,655  | 28.3% | (27.5%, 29.1%) | (ref)    | (ref)          | (ref)          |         | (ref)       | (ref)        | (ref)        |         |
|                       | <b>Rectal</b>      | 6,005  | 811    | 13.5% | (12.7%, 14.4%) | 0.40     | 0.36           | 0.43           |         | 0.40        | 0.37         | 0.44         |         |
|                       | <b>Liver</b>       | 1,541  | 668    | 43.3% | (40.9%, 45.8%) | 1.94     | 1.74           | 2.16           |         | 1.92        | 1.72         | 2.15         |         |
|                       | <b>Pancreatic</b>  | 3,491  | 1,674  | 48.0% | (46.3%, 49.6%) | 2.34     | 2.16           | 2.52           |         | 1.94        | 1.79         | 2.10         |         |
|                       | <b>Lung</b>        | 16,003 | 5,818  | 36.4% | (35.6%, 37.1%) | 1.45     | 1.38           | 1.52           |         | 1.34        | 1.27         | 1.42         |         |
|                       | <b>Ovarian</b>     | 1,908  | 393    | 20.6% | (18.8%, 22.5%) | 0.66     | 0.58           | 0.74           |         | 0.61        | 0.54         | 0.68         |         |
| Norway                |                    | All    | EP     | %EP   | 95% CI         | Crude OR | Crude OR (LCI) | Crude OR (UCI) | p(COR)  | Adjusted OR | Adj OR (LCI) | Adj OR (UCI) | p(AOR)  |
|                       | <b>Total</b>       | 46,147 | 16,866 | 36.5% | (36.1%, 37.0%) |          |                |                |         |             |              |              |         |
| <b>Sex</b>            | <b>Male</b>        | 23,319 | 8,410  | 36.1% | (35.5%, 36.7%) | (ref)    | (ref)          | (ref)          | 0.029   | (ref)       | (ref)        | (ref)        | 0.51    |
|                       | <b>Female</b>      | 22,828 | 8,456  | 37.0% | (36.4%, 37.7%) | 1.04     | 1.00           | 1.08           |         | 1.01        | 0.97         | 1.06         |         |
| <b>Diagnosis year</b> | <b>2012</b>        | 8,962  | 3,508  | 39.1% | (38.1%, 40.2%) | (ref)    | (ref)          | (ref)          | <0.0001 | (ref)       | (ref)        | (ref)        | <0.0001 |
|                       | <b>2013</b>        | 9,060  | 3,350  | 37.0% | (36.0%, 38.0%) | 0.91     | 0.86           | 0.97           |         | 0.92        | 0.86         | 0.98         |         |
|                       | <b>2014</b>        | 9,293  | 3,435  | 37.0% | (36.0%, 37.9%) | 0.91     | 0.86           | 0.97           |         | 0.93        | 0.87         | 0.99         |         |
|                       | <b>2015</b>        | 9,561  | 3,445  | 36.0% | (35.1%, 37.0%) | 0.88     | 0.83           | 0.93           |         | 0.88        | 0.83         | 0.94         |         |
|                       | <b>2016</b>        | 9,271  | 3,128  | 33.7% | (32.8%, 34.7%) | 0.79     | 0.75           | 0.84           |         | 0.80        | 0.75         | 0.86         |         |
| <b>Age group</b>      | <b>15-64</b>       | 13,277 | 4,165  | 31.4% | (30.6%, 32.2%) | 0.89     | 0.85           | 0.94           | <0.0001 | 0.91        | 0.86         | 0.96         | <0.0001 |
|                       | <b>65-74</b>       | 15,278 | 5,172  | 33.9% | (33.1%, 34.6%) | (ref)    | (ref)          | (ref)          |         | (ref)       | (ref)        | (ref)        |         |
|                       | <b>75-84</b>       | 12,424 | 4,838  | 38.9% | (38.1%, 39.8%) | 1.25     | 1.19           | 1.31           |         | 1.30        | 1.23         | 1.37         |         |
|                       | <b>85+</b>         | 5,168  | 2,691  | 52.1% | (50.7%, 53.4%) | 2.12     | 1.99           | 2.26           |         | 2.28        | 2.13         | 2.44         |         |
| <b>Stage</b>          | <b>Local</b>       | 8,515  | 1,487  | 17.5% | (16.7%, 18.3%) | (ref)    | (ref)          | (ref)          | <0.0001 | (ref)       | (ref)        | (ref)        | <0.0001 |
|                       | <b>Regional</b>    | 16,460 | 4,942  | 30.0% | (29.3%, 30.7%) | 2.03     | 1.90           | 2.16           |         | 2.04        | 1.91         | 2.18         |         |
|                       | <b>Distant</b>     | 15,613 | 8,140  | 52.1% | (51.4%, 52.9%) | 5.15     | 4.83           | 5.49           |         | 5.04        | 4.72         | 5.39         |         |
|                       | <b>Unknown</b>     | 5,559  | 2,297  | 41.3% | (40.0%, 42.6%) | 3.33     | 3.08           | 3.60           |         | 2.67        | 2.46         | 2.90         |         |
| <b>Cancer site</b>    | <b>Oesophageal</b> | 1,332  | 435    | 32.7% | (30.2%, 35.2%) | 0.87     | 0.77           | 0.98           | <0.0001 | 0.82        | 0.73         | 0.93         | <0.0001 |
|                       | <b>Stomach</b>     | 2,357  | 943    | 40.0% | (38.0%, 42.0%) | 1.19     | 1.09           | 1.31           |         | 1.09        | 0.99         | 1.20         |         |
|                       | <b>Colon</b>       | 14,941 | 5,354  | 35.8% | (35.1%, 36.6%) | (ref)    | (ref)          | (ref)          |         | (ref)       | (ref)        | (ref)        |         |
|                       | <b>Rectal</b>      | 5,612  | 888    | 15.8% | (14.9%, 16.8%) | 0.34     | 0.31           | 0.36           |         | 0.37        | 0.34         | 0.40         |         |
|                       | <b>Liver</b>       | 1,181  | 597    | 50.6% | (47.7%, 53.4%) | 1.83     | 1.63           | 2.06           |         | 2.11        | 1.85         | 2.39         |         |
|                       | <b>Pancreatic</b>  | 3,715  | 2,059  | 55.4% | (53.8%, 57.0%) | 2.23     | 2.07           | 2.39           |         | 1.70        | 1.57         | 1.83         |         |
|                       | <b>Lung</b>        | 14,402 | 5,679  | 39.4% | (38.6%, 40.2%) | 1.17     | 1.11           | 1.22           |         | 1.03        | 0.98         | 1.08         |         |
|                       | <b>Ovarian</b>     | 2,607  | 911    | 34.9% | (33.1%, 36.8%) | 0.96     | 0.88           | 1.05           |         | 0.68        | 0.61         | 0.75         |         |

| England               |                    | All     | EP      | %EP   | 95% CI         | Crude OR | Crude OR (LCI) | Crude OR (UCI) | p(COR)  | Adjusted OR | Adj OR (LCI) | Adj OR (UCI) | p(AOR)  |
|-----------------------|--------------------|---------|---------|-------|----------------|----------|----------------|----------------|---------|-------------|--------------|--------------|---------|
|                       | <b>Total</b>       | 373,194 | 116,934 | 31.3% | (31.2%, 31.5%) |          |                |                |         |             |              |              |         |
| <b>Sex</b>            | <b>Male</b>        | 197,003 | 57,839  | 29.4% | (29.2%, 29.6%) | (ref)    | (ref)          | (ref)          | <0.0001 | (ref)       | (ref)        | (ref)        | <0.0001 |
|                       | <b>Female</b>      | 176,191 | 59,095  | 33.5% | (33.3%, 33.8%) | 1.21     | 1.20           | 1.23           |         | 1.10        | 1.09         | 1.12         |         |
| <b>Diagnosis year</b> | <b>2012</b>        | -       | -       |       |                | (ref)    | (ref)          | (ref)          | <0.0001 | (ref)       | (ref)        | (ref)        | 0.0021  |
|                       | <b>2013</b>        | 90,993  | 29,271  | 32.2% | (31.9%, 32.5%) | 0.98     | 0.96           | 1.00           |         | 0.99        | 0.97         | 1.01         |         |
|                       | <b>2014</b>        | 92,609  | 29,315  | 31.7% | (31.4%, 32.0%) | 0.95     | 0.93           | 0.97           |         | 0.98        | 0.96         | 1.00         |         |
|                       | <b>2015</b>        | 94,296  | 29,297  | 31.1% | (30.8%, 31.4%) | 0.92     | 0.91           | 0.94           |         | 0.96        | 0.94         | 0.98         |         |
|                       | <b>2016</b>        | 95,296  | 29,051  | 30.5% | (30.2%, 30.8%) |          |                |                |         |             |              |              |         |
| <b>Age group</b>      | <b>15-64</b>       | 98,419  | 24,794  | 25.2% | (24.9%, 25.5%) | 0.97     | 0.95           | 0.99           | <0.0001 | 1.00        | 0.98         | 1.02         | <0.0001 |
|                       | <b>65-74</b>       | 112,970 | 29,192  | 25.8% | (25.6%, 26.1%) | (ref)    | (ref)          | (ref)          |         | (ref)       | (ref)        | (ref)        |         |
|                       | <b>75-84</b>       | 110,521 | 37,552  | 34.0% | (33.7%, 34.3%) | 1.48     | 1.45           | 1.50           |         | 1.48        | 1.45         | 1.51         |         |
|                       | <b>85+</b>         | 51,284  | 25,396  | 49.5% | (49.1%, 50.0%) | 2.82     | 2.75           | 2.88           |         | 2.72        | 2.66         | 2.79         |         |
| <b>Stage</b>          | <b>1</b>           | 48,445  | 6,025   | 12.4% | (12.1%, 12.7%) | (ref)    | (ref)          | (ref)          | <0.0001 | (ref)       | (ref)        | (ref)        | <0.0001 |
|                       | <b>2</b>           | 49,375  | 9,928   | 20.1% | (19.8%, 20.5%) | 1.77     | 1.71           | 1.83           |         | 1.75        | 1.69         | 1.82         |         |
|                       | <b>3</b>           | 80,853  | 17,432  | 21.6% | (21.3%, 21.8%) | 1.94     | 1.87           | 2.00           |         | 2.02        | 1.96         | 2.09         |         |
|                       | <b>4</b>           | 136,382 | 58,525  | 42.9% | (42.7%, 43.2%) | 5.29     | 5.14           | 5.45           |         | 4.94        | 4.80         | 5.09         |         |
|                       | <b>Unknown</b>     | 58,139  | 25,024  | 43.0% | (42.6%, 43.4%) | 5.32     | 5.16           | 5.49           |         | 4.22        | 4.08         | 4.36         |         |
| <b>Cancer site</b>    | <b>Oesophageal</b> | 27,274  | 5,364   | 19.7% | (19.2%, 20.1%) | 0.59     | 0.57           | 0.61           | <0.0001 | 0.53        | 0.51         | 0.55         | <0.0001 |
|                       | <b>Stomach</b>     | 19,813  | 6,224   | 31.4% | (30.8%, 32.1%) | 1.10     | 1.07           | 1.14           |         | 0.87        | 0.84         | 0.90         |         |
|                       | <b>Colon</b>       | 88,219  | 25,859  | 29.3% | (29.0%, 29.6%) | (ref)    | (ref)          | (ref)          |         | (ref)       | (ref)        | (ref)        |         |
|                       | <b>Rectal</b>      | 33,905  | 3,628   | 10.7% | (10.4%, 11.0%) | 0.29     | 0.28           | 0.30           |         | 0.33        | 0.32         | 0.34         |         |
|                       | <b>Liver</b>       | 17,699  | 7,497   | 42.4% | (41.6%, 43.1%) | 1.77     | 1.71           | 1.83           |         | 1.29        | 1.25         | 1.34         |         |
|                       | <b>Pancreatic</b>  | 30,442  | 14,291  | 46.9% | (46.4%, 47.5%) | 2.13     | 2.08           | 2.19           |         | 1.53        | 1.49         | 1.57         |         |
|                       | <b>Lung</b>        | 135,396 | 46,951  | 34.7% | (34.4%, 34.9%) | 1.28     | 1.26           | 1.30           |         | 1.08        | 1.06         | 1.10         |         |
|                       | <b>Ovarian</b>     | 20,446  | 7,120   | 34.8% | (34.2%, 35.5%) | 1.29     | 1.25           | 1.33           |         | 1.38        | 1.33         | 1.43         |         |
| Northern Ireland      |                    | All     | EP      | %EP   | 95% CI         | Crude OR | Crude OR (LCI) | Crude OR (UCI) | p(COR)  | Adjusted OR | Adj OR (LCI) | Adj OR (UCI) | p(AOR)  |
|                       | <b>Total</b>       | 15,501  | 4,322   | 27.9% | (27.2%, 28.6%) |          |                |                |         |             |              |              |         |
| <b>Sex</b>            | <b>Male</b>        | 8,134   | 2,124   | 26.1% | (25.2%, 27.1%) | (ref)    | (ref)          | (ref)          | <0.0001 | (ref)       | (ref)        | (ref)        | 0.0030  |
|                       | <b>Female</b>      | 7,367   | 2,198   | 29.8% | (28.8%, 30.9%) | 1.20     | 1.12           | 1.29           |         | 1.13        | 1.04         | 1.22         |         |
| <b>Diagnosis year</b> | <b>2012</b>        | 3,071   | 909     | 29.6% | (28.0%, 31.2%) | 1.09     | 0.98           | 1.22           | 0.14    | 1.06        | 0.94         | 1.19         | 0.41    |
|                       | <b>2013</b>        | 3,125   | 867     | 27.7% | (26.2%, 29.3%) | (ref)    | (ref)          | (ref)          |         | (ref)       | (ref)        | (ref)        |         |
|                       | <b>2014</b>        | 3,051   | 856     | 28.1% | (26.5%, 29.7%) | 1.02     | 0.91           | 1.14           |         | 1.02        | 0.91         | 1.15         |         |
|                       | <b>2015</b>        | 3,072   | 835     | 27.2% | (25.6%, 28.8%) | 0.97     | 0.87           | 1.09           |         | 0.95        | 0.84         | 1.07         |         |
|                       | <b>2016</b>        | 3,182   | 855     | 26.9% | (25.4%, 28.4%) | 0.96     | 0.86           | 1.07           |         | 0.97        | 0.86         | 1.09         |         |
| <b>Age group</b>      | <b>15-64</b>       | 4,432   | 1,003   | 22.6% | (21.4%, 23.9%) | 0.90     | 0.82           | 0.99           | <0.0001 | 0.94        | 0.85         | 1.04         | <0.0001 |
|                       | <b>65-74</b>       | 4,965   | 1,220   | 24.6% | (23.4%, 25.8%) | (ref)    | (ref)          | (ref)          |         | (ref)       | (ref)        | (ref)        |         |
|                       | <b>75-84</b>       | 4,408   | 1,351   | 30.6% | (29.3%, 32.0%) | 1.36     | 1.24           | 1.49           |         | 1.32        | 1.20         | 1.46         |         |
|                       | <b>85+</b>         | 1,696   | 748     | 44.1% | (41.8%, 46.5%) | 2.42     | 2.16           | 2.72           |         | 2.21        | 1.94         | 2.51         |         |
| <b>Stage</b>          | <b>1</b>           | 2,221   | 172     | 7.7%  | (6.7%, 8.9%)   | (ref)    | (ref)          | (ref)          | <0.0001 | (ref)       | (ref)        | (ref)        | <0.0001 |
|                       | <b>2</b>           | 2,234   | 295     | 13.2% | (11.9%, 14.7%) | 1.81     | 1.49           | 2.21           |         | 1.87        | 1.53         | 2.29         |         |
|                       | <b>3</b>           | 3,584   | 734     | 20.5% | (19.2%, 21.8%) | 3.07     | 2.58           | 3.67           |         | 3.17        | 2.66         | 3.79         |         |
|                       | <b>4</b>           | 5,184   | 2,175   | 42.0% | (40.6%, 43.3%) | 8.61     | 7.32           | 10.19          |         | 8.32        | 7.06         | 9.87         |         |
|                       | <b>Unknown</b>     | 2,278   | 946     | 41.5% | (39.5%, 43.6%) | 8.46     | 7.11           | 10.12          |         | 6.88        | 5.73         | 8.29         |         |
| <b>Cancer site</b>    | <b>Oesophageal</b> | 972     | 193     | 19.9% | (17.5%, 22.5%) | 0.79     | 0.67           | 0.94           | <0.0001 | 0.56        | 0.47         | 0.68         | <0.0001 |
|                       | <b>Stomach</b>     | 990     | 293     | 29.6% | (26.8%, 32.5%) | 1.35     | 1.15           | 1.57           |         | 0.85        | 0.72         | 1.00         |         |
|                       | <b>Colon</b>       | 3,846   | 914     | 23.8% | (22.4%, 25.1%) | (ref)    | (ref)          | (ref)          |         | (ref)       | (ref)        | (ref)        |         |
|                       | <b>Rectal</b>      | 1,376   | 125     | 9.1%  | (7.7%, 10.7%)  | 0.32     | 0.26           | 0.39           |         | 0.36        | 0.29         | 0.44         |         |
|                       | <b>Liver</b>       | 582     | 215     | 36.9% | (33.1%, 40.9%) | 1.88     | 1.56           | 2.26           |         | 1.36        | 1.12         | 1.67         |         |
|                       | <b>Pancreatic</b>  | 1,162   | 496     | 42.7% | (39.9%, 45.5%) | 2.39     | 2.08           | 2.74           |         | 1.50        | 1.29         | 1.74         |         |
|                       | <b>Lung</b>        | 5,752   | 1,843   | 32.0% | (30.8%, 33.3%) | 1.51     | 1.38           | 1.66           |         | 1.17        | 1.06         | 1.30         |         |
|                       | <b>Ovarian</b>     | 821     | 243     | 29.6% | (26.6%, 32.8%) | 1.35     | 1.14           | 1.59           |         | 1.40        | 1.16         | 1.68         |         |

| Scotland              |                    | All    | EP     | %EP   | 95% CI         | Crude OR | Crude OR (LCI) | Crude OR (UCI) | p(COR)  | Adjusted OR | Adj OR (LCI) | Adj OR (UCI) | p(AOR)  |
|-----------------------|--------------------|--------|--------|-------|----------------|----------|----------------|----------------|---------|-------------|--------------|--------------|---------|
|                       | <b>Total</b>       | 45,029 | 17,321 | 38.5% | (38.0%, 38.9%) |          |                |                |         |             |              |              |         |
| <b>Sex</b>            | <b>Male</b>        | 23,042 | 8,506  | 36.9% | (36.3%, 37.5%) | 0.87     | 0.84           | 0.91           | <0.0001 | 0.96        | 0.92         | 1.00         | 0.081   |
|                       | <b>Female</b>      | 21,987 | 8,815  | 40.1% | (39.4%, 40.7%) | (ref)    | (ref)          | (ref)          |         | (ref)       | (ref)        | (ref)        |         |
| <b>Diagnosis year</b> | <b>2014</b>        | 11,599 | 4,511  | 38.9% | (38.0%, 39.8%) | (ref)    | (ref)          | (ref)          | 0.048   | (ref)       | (ref)        | (ref)        | 0.18    |
|                       | <b>2015</b>        | 11,091 | 4,346  | 39.2% | (38.3%, 40.1%) | 1.01     | 0.96           | 1.07           |         | 1.01        | 0.96         | 1.07         |         |
|                       | <b>2016</b>        | 11,064 | 4,236  | 38.3% | (37.4%, 39.2%) | 0.97     | 0.92           | 1.03           |         | 0.98        | 0.93         | 1.04         |         |
|                       | <b>2017</b>        | 11,275 | 4,228  | 37.5% | (36.6%, 38.4%) | 0.94     | 0.89           | 0.99           |         | 0.95        | 0.9          | 1.01         |         |
| <b>Age group</b>      | <b>15-64</b>       | 12,024 | 3,920  | 32.6% | (31.8%, 33.4%) | 0.95     | 0.90           | 1.00           | <0.0001 | 0.99        | 0.94         | 1.05         | <0.0001 |
|                       | <b>65-74</b>       | 14,233 | 4,817  | 33.8% | (33.1%, 34.6%) | (ref)    | (ref)          | (ref)          |         | (ref)       | (ref)        | (ref)        |         |
|                       | <b>75-84</b>       | 13,399 | 5,580  | 41.6% | (40.8%, 42.5%) | 1.39     | 1.33           | 1.46           |         | 1.39        | 1.32         | 1.47         |         |
|                       | <b>85+</b>         | 5,373  | 3,004  | 55.9% | (54.6%, 57.2%) | 2.48     | 2.32           | 2.64           |         | 2.38        | 2.23         | 2.55         |         |
| <b>Stage</b>          | <b>1</b>           | 5,858  | 1,216  | 20.8% | (19.7%, 21.8%) | (ref)    | (ref)          | (ref)          | <0.0001 | (ref)       | (ref)        | (ref)        | <0.0001 |
|                       | <b>2</b>           | 5,857  | 1,534  | 26.2% | (25.1%, 27.3%) | 1.35     | 1.24           | 1.48           |         | 1.43        | 1.31         | 1.56         |         |
|                       | <b>3</b>           | 9,180  | 2,736  | 29.8% | (28.9%, 30.7%) | 1.62     | 1.50           | 1.75           |         | 1.71        | 1.58         | 1.85         |         |
|                       | <b>4</b>           | 17,250 | 8,585  | 49.8% | (49.0%, 50.5%) | 3.78     | 3.53           | 4.06           |         | 3.52        | 3.28         | 3.79         |         |
|                       | <b>Unknown</b>     | 6,884  | 3,250  | 47.2% | (46.0%, 48.4%) | 3.41     | 3.16           | 3.70           |         | 2.98        | 2.74         | 3.24         |         |
| <b>Cancer site</b>    | <b>Oesophageal</b> | 3,378  | 851    | 25.2% | (23.8%, 26.7%) | 0.62     | 0.57           | 0.68           | <0.0001 | 0.54        | 0.49         | 0.59         | <0.0001 |
|                       | <b>Stomach</b>     | 2,337  | 913    | 39.1% | (37.1%, 41.1%) | 1.19     | 1.08           | 1.30           |         | 0.92        | 0.83         | 1.01         |         |
|                       | <b>Colon</b>       | 9,600  | 3,366  | 35.1% | (34.1%, 36.0%) | (ref)    | (ref)          | (ref)          |         | (ref)       | (ref)        | (ref)        |         |
|                       | <b>Rectal</b>      | 3,535  | 499    | 14.1% | (13.0%, 15.3%) | 0.30     | 0.27           | 0.34           |         | 0.34        | 0.30         | 0.37         |         |
|                       | <b>Liver</b>       | 2,340  | 1,111  | 47.5% | (45.5%, 49.5%) | 1.67     | 1.53           | 1.83           |         | 1.44        | 1.31         | 1.59         |         |
|                       | <b>Pancreatic</b>  | 3,054  | 1,809  | 59.2% | (57.5%, 61.0%) | 2.69     | 2.48           | 2.93           |         | 2.14        | 1.96         | 2.34         |         |
|                       | <b>Lung</b>        | 18,662 | 7,863  | 42.1% | (41.4%, 42.8%) | 1.35     | 1.28           | 1.42           |         | 1.20        | 1.13         | 1.26         |         |
|                       | <b>Ovarian</b>     | 2,123  | 909    | 42.8% | (40.7%, 44.9%) | 1.39     | 1.26           | 1.53           |         | 1.47        | 1.33         | 1.63         |         |
| Wales                 |                    | All    | EP     | %EP   | 95% CI         | Crude OR | Crude OR (LCI) | Crude OR (UCI) | p(COR)  | Adjusted OR | Adj OR (LCI) | Adj OR (UCI) | p(AOR)  |
|                       | <b>Total</b>       | 26,139 | 9,763  | 37.4% | (36.8%, 37.9%) |          |                |                |         |             |              |              |         |
| <b>Sex</b>            | <b>Male</b>        | 14,017 | 4,977  | 35.5% | (34.7%, 36.3%) | (ref)    | (ref)          | (ref)          | <0.0001 | (ref)       | (ref)        | (ref)        | 0.00079 |
|                       | <b>Female</b>      | 12,122 | 4,786  | 39.5% | (38.6%, 40.4%) | 1.18     | 1.13           | 1.25           |         | 1.10        | 1.04         | 1.16         |         |
| <b>Diagnosis year</b> | <b>2012</b>        | -      | -      | -     | -              |          |                |                |         |             |              |              |         |
|                       | <b>2013</b>        | 6,537  | 2,490  | 38.1% | (36.9%, 39.3%) | (ref)    | (ref)          | (ref)          | <0.0001 | (ref)       | (ref)        | (ref)        | 0.46    |
|                       | <b>2014</b>        | 6,586  | 2,482  | 37.7% | (36.5%, 38.9%) | 0.98     | 0.92           | 1.05           |         | 0.99        | 0.92         | 1.06         |         |
|                       | <b>2015</b>        | 6,545  | 2,408  | 36.8% | (35.6%, 38.0%) | 0.95     | 0.88           | 1.02           |         | 0.94        | 0.88         | 1.02         |         |
|                       | <b>2016</b>        | 6,471  | 2,383  | 36.8% | (35.7%, 38.0%) | 0.95     | 0.88           | 1.02           |         | 0.98        | 0.91         | 1.06         |         |
| <b>Age group</b>      | <b>15-64</b>       | 6,645  | 2,133  | 32.1% | (31.0%, 33.2%) | 0.96     | 0.90           | 1.03           | <0.0001 | 0.96        | 0.90         | 1.04         | <0.0001 |
|                       | <b>65-74</b>       | 8,453  | 2,791  | 33.0% | (32.0%, 34.0%) | (ref)    | (ref)          | (ref)          |         | (ref)       | (ref)        | (ref)        |         |
|                       | <b>75-84</b>       | 7,758  | 3,088  | 39.8% | (38.7%, 40.9%) | 1.34     | 1.26           | 1.43           |         | 1.35        | 1.26         | 1.45         |         |
|                       | <b>85+</b>         | 3,283  | 1,751  | 53.3% | (51.6%, 55.0%) | 2.32     | 2.14           | 2.52           |         | 2.32        | 2.13         | 2.54         |         |
| <b>Stage</b>          | <b>1</b>           | 3,310  | 575    | 17.4% | (16.1%, 18.7%) | (ref)    | (ref)          | (ref)          | <0.0001 | (ref)       | (ref)        | (ref)        | <0.0001 |
|                       | <b>2</b>           | 3,451  | 941    | 27.3% | (25.8%, 28.8%) | 1.78     | 1.59           | 2.01           |         | 1.88        | 1.66         | 2.12         |         |
|                       | <b>3</b>           | 6,038  | 1,680  | 27.8% | (26.7%, 29.0%) | 1.83     | 1.65           | 2.04           |         | 2.04        | 1.83         | 2.27         |         |
|                       | <b>4</b>           | 9,006  | 4,485  | 49.8% | (48.8%, 50.8%) | 4.72     | 4.28           | 5.21           |         | 4.51        | 4.07         | 5.00         |         |
|                       | <b>Unknown</b>     | 4,334  | 2,082  | 48.0% | (46.6%, 49.5%) | 4.40     | 3.95           | 4.90           |         | 3.64        | 3.25         | 4.08         |         |
| <b>Cancer site</b>    | <b>Oesophageal</b> | 1,703  | 435    | 25.5% | (23.5%, 27.7%) | 0.66     | 0.58           | 0.74           | <0.0001 | 0.6         | 0.53         | 0.68         | <0.0001 |
|                       | <b>Stomach</b>     | 1,656  | 648    | 39.1% | (36.8%, 41.5%) | 1.24     | 1.10           | 1.38           |         | 0.98        | 0.88         | 1.11         |         |
|                       | <b>Colon</b>       | 6,142  | 2,102  | 34.2% | (33.0%, 35.4%) | (ref)    | (ref)          | (ref)          |         | (ref)       | (ref)        | (ref)        |         |
|                       | <b>Rectal</b>      | 2,577  | 355    | 13.8% | (12.5%, 15.2%) | 0.31     | 0.27           | 0.35           |         | 0.34        | 0.30         | 0.38         |         |
|                       | <b>Liver</b>       | 1,155  | 583    | 50.5% | (47.6%, 53.4%) | 1.96     | 1.73           | 2.22           |         | 1.44        | 1.26         | 1.65         |         |
|                       | <b>Pancreatic</b>  | 1,965  | 1,115  | 56.7% | (54.5%, 58.9%) | 2.52     | 2.27           | 2.8            |         | 1.85        | 1.65         | 2.06         |         |
|                       | <b>Lung</b>        | 9,365  | 3,882  | 41.5% | (40.5%, 42.5%) | 1.36     | 1.27           | 1.45           |         | 1.20        | 1.12         | 1.29         |         |
|                       | <b>Ovarian</b>     | 1,576  | 643    | 40.8% | (38.4%, 43.2%) | 1.32     | 1.18           | 1.48           |         | 1.48        | 1.31         | 1.68         |         |



| Alberta               |                    | All    | EP    | %EP   | 95% CI         | Crude OR | Crude OR (LCI) | Crude OR (UCI) | p(COR)  | Adjusted OR | Adj OR (LCI) | Adj OR (UCI) | p(AOR)  |
|-----------------------|--------------------|--------|-------|-------|----------------|----------|----------------|----------------|---------|-------------|--------------|--------------|---------|
|                       | <b>Total</b>       | 19,969 | 5,981 | 30.0% | (29.3%, 30.6%) |          |                |                |         |             |              |              |         |
| <b>Sex</b>            | <b>Male</b>        | 10,455 | 3,116 | 29.8% | (28.9%, 30.7%) | (ref)    | (ref)          | (ref)          | 0.63    | (ref)       | (ref)        | (ref)        | 0.34    |
|                       | <b>Female</b>      | 9,514  | 2,865 | 30.1% | (29.2%, 31.0%) | 1.03     | 0.96           | 1.08           |         | 0.97        | 0.91         | 1.03         |         |
| <b>Diagnosis year</b> | <b>2012</b>        | 4,628  | 1,392 | 30.1% | (28.8%, 31.4%) | 0.96     | 0.88           | 1.05           | 0.38    | 0.99        | 0.90         | 1.08         | 0.94    |
|                       | <b>2013</b>        | 4,812  | 1,485 | 30.9% | (29.6%, 32.2%) | (ref)    | (ref)          | (ref)          |         | (ref)       | (ref)        | (ref)        |         |
|                       | <b>2014</b>        | 5,307  | 1,570 | 29.6% | (28.4%, 30.8%) | 0.94     | 0.86           | 1.02           |         | 0.97        | 0.89         | 1.07         |         |
|                       | <b>2015</b>        | 5,222  | 1,534 | 29.4% | (28.2%, 30.6%) | 0.93     | 0.86           | 1.01           |         | 0.97        | 0.89         | 1.07         |         |
| <b>Age group</b>      | <b>15-64</b>       | 7,701  | 1,947 | 25.3% | (24.3%, 26.3%) | 0.96     | 0.89           | 1.04           | <0.0001 | 0.98        | 0.9          | 1.06         | <0.0001 |
|                       | <b>65-74</b>       | 5,714  | 1,492 | 26.1% | (25.0%, 27.3%) | (ref)    | (ref)          | (ref)          |         | (ref)       | (ref)        | (ref)        |         |
|                       | <b>75-84</b>       | 4,711  | 1,635 | 34.7% | (33.4%, 36.1%) | 1.52     | 1.38           | 1.64           |         | 1.53        | 1.4          | 1.67         |         |
|                       | <b>85+</b>         | 1,843  | 907   | 49.2% | (46.9%, 51.5%) | 2.74     | 2.46           | 3.06           |         | 2.71        | 2.41         | 3.04         |         |
| <b>Stage</b>          | <b>1</b>           | 3,827  | 491   | 12.8% | (11.8%, 13.9%) | (ref)    | (ref)          | (ref)          | <0.0001 | (ref)       | (ref)        | (ref)        | <0.0001 |
|                       | <b>2</b>           | 3,042  | 725   | 23.8% | (22.4%, 25.4%) | 2.01     | 1.87           | 2.41           |         | 1.87        | 1.75         | 2.27         |         |
|                       | <b>3</b>           | 4,420  | 1,038 | 23.5% | (22.3%, 24.8%) | 1.99     | 1.86           | 2.35           |         | 2.09        | 1.96         | 2.49         |         |
|                       | <b>4</b>           | 7,733  | 3,399 | 44.0% | (42.9%, 45.1%) | 5.13     | 4.80           | 5.92           |         | 5.01        | 4.70         | 5.84         |         |
|                       | <b>Unknown</b>     | 947    | 328   | 34.6% | (31.7%, 37.7%) | 3.40     | 3.05           | 4.24           |         | 2.87        | 2.57         | 3.63         |         |
| <b>Cancer site</b>    | <b>Oesophageal</b> | 708    | 163   | 23.0% | (20.1%, 26.3%) | 0.73     | 0.62           | 0.90           | <0.0001 | 0.54        | 0.46         | 0.67         | <0.0001 |
|                       | <b>Stomach</b>     | 1,020  | 353   | 34.6% | (31.8%, 37.6%) | 1.27     | 1.14           | 1.52           |         | 0.94        | 0.84         | 1.13         |         |
|                       | <b>Colon</b>       | 5,142  | 1,471 | 28.6% | (27.4%, 29.9%) | (ref)    | (ref)          | (ref)          |         | (ref)       | (ref)        | (ref)        |         |
|                       | <b>Rectal</b>      | 1,976  | 254   | 12.9% | (11.5%, 14.4%) | 0.37     | 0.32           | 0.42           |         | 0.39        | 0.33         | 0.45         |         |
|                       | <b>Liver</b>       | 1,054  | 334   | 31.7% | (29.0%, 34.6%) | 1.15     | 1.00           | 1.33           |         | 1.21        | 1.04         | 1.41         |         |
|                       | <b>Pancreatic</b>  | 1,671  | 683   | 40.9% | (38.5%, 43.2%) | 1.74     | 1.54           | 1.93           |         | 1.16        | 1.02         | 1.30         |         |
|                       | <b>Lung</b>        | 7,468  | 2,484 | 33.3% | (32.2%, 34.3%) | 1.24     | 1.15           | 1.34           |         | 0.90        | 0.83         | 0.99         |         |
|                       | <b>Ovarian</b>     | 930    | 239   | 25.7% | (23.0%, 28.6%) | 0.86     | 0.74           | 1.01           |         | 0.90        | 0.77         | 1.09         |         |
| Atlantic Canada \$    |                    | All    | EP    | %EP   | 95% CI         | Crude OR | Crude OR (LCI) | Crude OR (UCI) | p(COR)  | Adjusted OR | Adj OR (LCI) | Adj OR (UCI) | p(AOR)  |
|                       | <b>Total</b>       | 22,125 | 5,950 | 26.9% | (26.3%, 27.5%) |          |                |                |         |             |              |              |         |
| <b>Sex</b>            | <b>Male</b>        | 12,120 | 3,190 | 26.3% | (25.5%, 27.1%) | (ref)    | (ref)          | (ref)          | 0.054   | (ref)       | (ref)        | (ref)        | 0.90    |
|                       | <b>Female</b>      | 10,020 | 2,760 | 27.5% | (26.7%, 28.4%) | 1.06     | 1.00           | 1.13           |         | 1.00        | 0.94         | 1.07         |         |
| <b>Diagnosis year</b> | <b>2012</b>        | 5,405  | 1,450 | 26.8% | (25.7%, 28.0%) | 1.04     | 0.95           | 1.13           | 0.35    | 1.05        | 0.96         | 1.14         | 0.33    |
|                       | <b>2013</b>        | 5,555  | 1,465 | 26.4% | (25.2%, 27.5%) | (ref)    | (ref)          | (ref)          |         | (ref)       | (ref)        | (ref)        |         |
|                       | <b>2014</b>        | 5,660  | 1,565 | 27.7% | (26.5%, 28.8%) | 1.08     | 0.99           | 1.17           |         | 1.08        | 0.99         | 1.18         |         |
|                       | <b>2015</b>        | 5,500  | 1,470 | 26.7% | (25.6%, 27.9%) | 1.04     | 0.95           | 1.13           |         | 1.06        | 0.97         | 1.16         |         |
| <b>Age group</b>      | <b>15-64</b>       | 7,110  | 1,570 | 22.1% | (21.1%, 23.1%) | 0.91     | 0.84           | 0.98           | <0.0001 | 0.89        | 0.82         | 0.97         | <0.0001 |
|                       | <b>65-74</b>       | 7,460  | 1,785 | 23.9% | (23.0%, 24.9%) | (ref)    | (ref)          | (ref)          |         | (ref)       | (ref)        | (ref)        |         |
|                       | <b>75-84</b>       | 5,510  | 1,710 | 31.0% | (29.8%, 32.3%) | 1.44     | 1.33           | 1.56           |         | 1.45        | 1.34         | 1.57         |         |
|                       | <b>85+</b>         | 2,035  | 890   | 43.7% | (41.6%, 45.9%) | 2.46     | 2.22           | 2.73           |         | 2.32        | 2.09         | 2.59         |         |
| <b>Stage</b>          | <b>1</b>           | 4,550  | 560   | 12.3% | (11.4%, 13.3%) | (ref)    | (ref)          | (ref)          | <0.0001 | (ref)       | (ref)        | (ref)        | <0.0001 |
|                       | <b>2</b>           | 3,250  | 660   | 20.3% | (19.0%, 21.7%) | 1.82     | 1.61           | 2.06           |         | 1.68        | 1.48         | 1.90         |         |
|                       | <b>3</b>           | 4,515  | 970   | 21.5% | (20.3%, 22.7%) | 1.92     | 1.72           | 2.15           |         | 2.02        | 1.80         | 2.27         |         |
|                       | <b>4</b>           | 7,275  | 2,830 | 38.9% | (37.8%, 40.0%) | 4.47     | 4.04           | 4.94           |         | 4.65        | 4.20         | 5.15         |         |
|                       | <b>Unknown</b>     | 2,530  | 925   | 36.6% | (34.7%, 38.5%) | 3.95     | 3.50           | 4.45           |         | 3.34        | 2.92         | 3.82         |         |
| <b>Cancer site</b>    | <b>Oesophageal</b> | 675    | 140   | 20.7% | (17.9%, 24.0%) | 0.69     | 0.56           | 0.83           | <0.0001 | 0.57        | 0.46         | 0.69         | <0.0001 |
|                       | <b>Stomach</b>     | 1,150  | 350   | 30.4% | (27.8%, 33.2%) | 1.13     | 0.98           | 1.29           |         | 0.83        | 0.71         | 0.96         |         |
|                       | <b>Colon</b>       | 6,135  | 1,745 | 28.4% | (27.3%, 29.6%) | (ref)    | (ref)          | (ref)          |         | (ref)       | (ref)        | (ref)        |         |
|                       | <b>Rectal</b>      | 2,100  | 265   | 12.6% | (11.3%, 14.1%) | 0.36     | 0.31           | 0.41           |         | 0.37        | 0.32         | 0.43         |         |
|                       | <b>Liver</b>       | 685    | 235   | 34.3% | (30.8%, 37.9%) | 1.28     | 1.08           | 1.51           |         | 1.02        | 0.85         | 1.23         |         |
|                       | <b>Pancreatic</b>  | 1,445  | 560   | 38.8% | (36.3%, 41.3%) | 1.59     | 1.41           | 1.79           |         | 1.10        | 0.97         | 1.26         |         |
|                       | <b>Lung</b>        | 9,135  | 2,430 | 26.6% | (25.7%, 27.5%) | 0.91     | 0.85           | 0.98           |         | 0.71        | 0.65         | 0.77         |         |
|                       | <b>Ovarian</b>     | 800    | 225   | 28.1% | (25.1%, 31.3%) | 1.00     | 0.85           | 1.18           |         | 0.90        | 0.75         | 1.08         |         |

| British Columbia S    |                    | All    | EP     | %EP   | 95% CI         | Crude OR | Crude OR (LCI) | Crude OR (UCI) | p(COR)  | Adjusted OR | Adj OR (LCI) | Adj OR (UCI) | p(AOR)  |
|-----------------------|--------------------|--------|--------|-------|----------------|----------|----------------|----------------|---------|-------------|--------------|--------------|---------|
|                       | <b>Total</b>       | 33,655 | 10,255 | 30.5% | (30.0%, 31.0%) |          |                |                |         |             |              |              |         |
| <b>Sex</b>            | <b>Male</b>        | 17,645 | 5,330  | 30.2% | (29.5%, 30.9%) | (ref)    | (ref)          | (ref)          | 0.30    | (ref)       | (ref)        | (ref)        | 0.34    |
|                       | <b>Female</b>      | 16,010 | 4,925  | 30.8% | (30.1%, 31.5%) | 1.03     | 0.98           | 1.07           |         | 0.98        | 0.93         | 1.03         |         |
| <b>Diagnosis year</b> | <b>2012</b>        | 8,110  | 2,500  | 30.8% | (29.8%, 31.8%) | 0.94     | 0.88           | 1.00           | <0.0001 | 0.95        | 0.89         | 1.02         | 0.00058 |
|                       | <b>2013</b>        | 8,370  | 2,690  | 32.1% | (31.1%, 33.1%) | (ref)    | (ref)          | (ref)          | (ref)   | (ref)       | (ref)        |              |         |
|                       | <b>2014</b>        | 8,710  | 2,610  | 30.0% | (29.0%, 30.9%) | 0.91     | 0.85           | 0.97           | 0.90    | 0.84        | 0.96         |              |         |
|                       | <b>2015</b>        | 8,460  | 2,440  | 28.8% | (27.9%, 29.8%) | 0.85     | 0.80           | 0.91           | 0.87    | 0.82        | 0.94         |              |         |
| <b>Age group</b>      | <b>15-64</b>       | 10,700 | 2,820  | 26.4% | (25.5%, 27.2%) | 1.03     | 0.97           | 1.10           | <0.0001 | 1.02        | 0.96         | 1.09         | <0.0001 |
|                       | <b>65-74</b>       | 10,140 | 2,610  | 25.7% | (24.9%, 26.6%) | (ref)    | (ref)          | (ref)          | (ref)   | (ref)       | (ref)        |              |         |
|                       | <b>75-84</b>       | 8,845  | 2,855  | 32.3% | (31.3%, 33.3%) | 1.38     | 1.29           | 1.47           | 1.38    | 1.29        | 1.47         |              |         |
|                       | <b>85+</b>         | 3,950  | 1,960  | 49.6% | (48.1%, 51.2%) | 2.83     | 2.62           | 3.06           | 2.80    | 2.58        | 3.03         |              |         |
| <b>Stage</b>          | <b>1</b>           | 4,500  | 425    | 9.4%  | (8.6%, 10.3%)  | (ref)    | (ref)          | (ref)          | <0.0001 | (ref)       | (ref)        | (ref)        | <0.0001 |
|                       | <b>2</b>           | 3,810  | 835    | 21.9% | (20.6%, 23.3%) | 2.73     | 2.41           | 3.10           | 2.67    | 2.35        | 3.04         |              |         |
|                       | <b>3</b>           | 5,880  | 1,380  | 23.5% | (22.4%, 24.6%) | 2.96     | 2.64           | 3.34           | 3.07    | 2.73        | 3.46         |              |         |
|                       | <b>4</b>           | 8,505  | 3,715  | 43.7% | (42.6%, 44.7%) | 7.53     | 6.76           | 8.41           | 7.30    | 6.54        | 8.17         |              |         |
|                       | <b>Unknown ^</b>   | 10,965 | 3,870  | 35.3% | (34.4%, 36.2%) | 5.28     | 4.74           | 5.88           | 3.84    | 3.34        | 4.42         |              |         |
| <b>Cancer site</b>    | <b>Oesophageal</b> | 1,165  | 330    | 28.3% | (25.8%, 31.0%) | 1.01     | 0.88           | 1.16           | <0.0001 | 0.86        | 0.73         | 1.02         | <0.0001 |
|                       | <b>Stomach</b>     | 1,590  | 640    | 40.3% | (37.9%, 42.7%) | 1.77     | 1.58           | 1.97           | 1.47    | 1.27        | 1.70         |              |         |
|                       | <b>Colon</b>       | 9,160  | 2,520  | 27.5% | (26.6%, 28.4%) | (ref)    | (ref)          | (ref)          | (ref)   | (ref)       | (ref)        |              |         |
|                       | <b>Rectal</b>      | 3,430  | 410    | 12.0% | (10.9%, 13.1%) | 0.36     | 0.32           | 0.40           | 0.36    | 0.32        | 0.40         |              |         |
|                       | <b>Liver</b>       | 1,760  | 670    | 38.1% | (35.8%, 40.4%) | 1.62     | 1.46           | 1.80           | 1.43    | 1.24        | 1.65         |              |         |
|                       | <b>Pancreatic</b>  | 2,620  | 1,085  | 41.4% | (39.5%, 43.3%) | 1.87     | 1.71           | 2.05           | 1.54    | 1.35        | 1.75         |              |         |
|                       | <b>Lung</b>        | 12,320 | 4,090  | 33.2% | (32.4%, 34.0%) | 1.31     | 1.24           | 1.39           | 0.97    | 0.91        | 1.04         |              |         |
|                       | <b>Ovarian</b>     | 1,610  | 510    | 31.7% | (29.5%, 34.0%) | 1.21     | 1.08           | 1.36           | 1.10    | 0.94        | 1.28         |              |         |
| Ontario               |                    | All    | EP     | %EP   | 95% CI         | Crude OR | Crude OR (LCI) | Crude OR (UCI) | p(COR)  | Adjusted OR | Adj OR (LCI) | Adj OR (UCI) | p(AOR)  |
|                       | <b>Total</b>       | 92,447 | 24,131 | 26.1% | (25.8%, 26.4%) |          |                |                |         |             |              |              |         |
| <b>Sex</b>            | <b>Male</b>        | 48,146 | 12,434 | 25.8% | (25.4%, 26.2%) | (ref)    | (ref)          | (ref)          | 0.046   | (ref)       | (ref)        | (ref)        | 0.20    |
|                       | <b>Female</b>      | 44,301 | 11,697 | 26.4% | (26.0%, 26.8%) | 1.03     | 1.00           | 1.06           |         | 1.02        | 0.99         | 1.05         |         |
| <b>Diagnosis year</b> | <b>2012</b>        | 18,090 | 4,581  | 25.3% | (24.7%, 26.0%) | 1.00     | 0.95           | 1.05           | 0.00031 | 0.99        | 0.95         | 1.05         | 0.0014  |
|                       | <b>2013</b>        | 17,978 | 4,557  | 25.3% | (24.7%, 26.0%) | (ref)    | (ref)          | (ref)          | (ref)   | (ref)       | (ref)        |              |         |
|                       | <b>2014</b>        | 18,513 | 4,915  | 26.5% | (25.9%, 27.2%) | 1.06     | 1.02           | 1.12           | 1.06    | 1.01        | 1.11         |              |         |
|                       | <b>2015</b>        | 18,859 | 5,093  | 27.0% | (26.4%, 27.6%) | 1.09     | 1.04           | 1.14           | 1.08    | 1.03        | 1.14         |              |         |
|                       | <b>2016</b>        | 19,007 | 4,985  | 26.2% | (25.6%, 26.9%) | 1.05     | 1.00           | 1.10           | 1.04    | 0.99        | 1.09         |              |         |
| <b>Age group</b>      | <b>15-64</b>       | 33,177 | 7,293  | 22.0% | (21.5%, 22.4%) | 0.91     | 0.87           | 0.94           | <0.0001 | 0.92        | 0.88         | 0.95         | <0.0001 |
|                       | <b>65-74</b>       | 28,027 | 6,643  | 23.7% | (23.2%, 24.2%) | (ref)    | (ref)          | (ref)          | (ref)   | (ref)       | (ref)        |              |         |
|                       | <b>75-84</b>       | 23,184 | 6,805  | 29.4% | (28.8%, 29.9%) | 1.34     | 1.29           | 1.39           | 1.36    | 1.31        | 1.42         |              |         |
|                       | <b>85+</b>         | 8,059  | 3,390  | 42.1% | (41.0%, 43.1%) | 2.34     | 2.22           | 2.46           | 2.46    | 2.33        | 2.60         |              |         |
| <b>Stage</b>          | <b>1</b>           | 16,620 | 1,909  | 11.5% | (11.0%, 12.0%) | (ref)    | (ref)          | (ref)          | <0.0001 | (ref)       | (ref)        | (ref)        | <0.0001 |
|                       | <b>2</b>           | 13,177 | 2,858  | 21.7% | (21.0%, 22.4%) | 2.13     | 2.00           | 2.27           | 1.94    | 1.82        | 2.07         |              |         |
|                       | <b>3</b>           | 19,476 | 4,233  | 21.7% | (21.2%, 22.3%) | 2.14     | 2.02           | 2.27           | 2.19    | 2.06        | 2.32         |              |         |
|                       | <b>4</b>           | 27,579 | 10,331 | 37.5% | (36.9%, 38.0%) | 4.62     | 4.38           | 4.87           | 4.72    | 4.47        | 4.99         |              |         |
|                       | <b>Unknown</b>     | 15,595 | 4,800  | 30.8% | (30.1%, 31.5%) | 3.43     | 3.23           | 3.63           | 3.40    | 3.19        | 3.63         |              |         |
| <b>Cancer site</b>    | <b>Oesophageal</b> | 3,099  | 630    | 20.3% | (18.9%, 21.8%) | 0.68     | 0.62           | 0.75           | <0.0001 | 0.50        | 0.45         | 0.55         | <0.0001 |
|                       | <b>Stomach</b>     | 6,465  | 1,738  | 26.9% | (25.8%, 28.0%) | 0.99     | 0.93           | 1.05           | 0.70    | 0.66        | 0.75         |              |         |
|                       | <b>Colon</b>       | 24,481 | 6,653  | 27.2% | (26.6%, 27.7%) | (ref)    | (ref)          | (ref)          | (ref)   | (ref)       | (ref)        |              |         |
|                       | <b>Rectal</b>      | 7,845  | 860    | 11.0% | (10.3%, 11.7%) | 0.33     | 0.31           | 0.36           | 0.35    | 0.32        | 0.38         |              |         |
|                       | <b>Liver</b>       | 4,129  | 1,167  | 28.3% | (26.9%, 29.7%) | 1.05     | 0.98           | 1.14           | 0.89    | 0.82        | 0.96         |              |         |
|                       | <b>Pancreatic</b>  | 6,456  | 2,279  | 35.3% | (34.1%, 36.5%) | 1.46     | 1.38           | 1.55           | 1.09    | 1.02        | 1.16         |              |         |
|                       | <b>Lung</b>        | 35,092 | 9,640  | 27.5% | (27.0%, 27.9%) | 1.01     | 0.98           | 1.05           | 0.80    | 0.77        | 0.83         |              |         |
|                       | <b>Ovarian</b>     | 4,880  | 1,164  | 23.9% | (22.7%, 25.1%) | 0.84     | 0.78           | 0.90           | 0.80    | 0.74        | 0.87         |              |         |

| Saskatchewan-Manitoba S |                                | All        | EP        | %EP        | 95% CI         | Crude OR        | Crude OR (LCI)        | Crude OR (UCI)        | p(COR)        | Adjusted OR        | Adj OR (LCI)        | Adj OR (UCI)        | p(AOR)        |
|-------------------------|--------------------------------|------------|-----------|------------|----------------|-----------------|-----------------------|-----------------------|---------------|--------------------|---------------------|---------------------|---------------|
|                         | <b>Total</b>                   | 16,655     | 4,715     | 28.3%      | (27.6%, 29.0%) |                 |                       |                       |               |                    |                     |                     |               |
| <b>Sex</b>              | <b>Male</b>                    | 8,780      | 2,375     | 27.1%      | (26.1%, 28.0%) | (ref)           | (ref)                 | (ref)                 | 0.00036       | (ref)              | (ref)               | (ref)               | 0.058         |
|                         | <b>Female</b>                  | 7,875      | 2,330     | 29.6%      | (28.6%, 30.6%) | 1.13            | 1.06                  | 1.21                  |               | 1.07               | 1.00                | 1.16                |               |
| <b>Diagnosis year</b>   | <b>2012</b>                    | 4,080      | 1,150     | 28.2%      | (26.8%, 29.6%) | 0.95            | 0.87                  | 1.05                  | 0.41          | 0.95               | 0.86                | 1.05                | 0.55          |
|                         | <b>2013</b>                    | 4,285      | 1,255     | 29.3%      | (27.9%, 30.7%) | (ref)           | (ref)                 | (ref)                 |               | (ref)              | (ref)               | (ref)               |               |
|                         | <b>2014</b>                    | 4,250      | 1,220     | 28.7%      | (27.4%, 30.1%) | 0.98            | 0.89                  | 1.07                  |               | 0.97               | 0.88                | 1.07                |               |
|                         | <b>2015</b>                    | 4,045      | 1,105     | 27.3%      | (26.0%, 28.7%) | 0.92            | 0.84                  | 1.02                  |               | 0.93               | 0.84                | 1.03                |               |
| <b>Age group</b>        | <b>15-64</b>                   | 5,545      | 1,275     | 23.0%      | (21.9%, 24.1%) | 0.90            | 0.82                  | 0.98                  | <0.0001       | 0.91               | 0.83                | 1.00                | <0.0001       |
|                         | <b>65-74</b>                   | 4,990      | 1,275     | 25.6%      | (24.4%, 26.8%) | (ref)           | (ref)                 | (ref)                 |               | (ref)              | (ref)               | (ref)               |               |
|                         | <b>75-84</b>                   | 4,215      | 1,335     | 31.7%      | (30.3%, 33.1%) | 1.36            | 1.24                  | 1.49                  |               | 1.42               | 1.30                | 1.57                |               |
|                         | <b>85+</b>                     | 1,910      | 825       | 43.2%      | (41.0%, 45.4%) | 2.31            | 2.06                  | 2.58                  |               | 2.44               | 2.17                | 2.74                |               |
| <b>Stage</b>            | <b>1</b>                       | 3,340      | 470       | 14.1%      | (12.9%, 15.3%) | (ref)           | (ref)                 | (ref)                 | <0.0001       | (ref)              | (ref)               | (ref)               | <0.0001       |
|                         | <b>2</b>                       | 2,630      | 610       | 23.2%      | (21.6%, 24.8%) | 1.79            | 1.57                  | 2.04                  |               | 1.71               | 1.49                | 1.96                |               |
|                         | <b>3</b>                       | 3,680      | 825       | 22.4%      | (21.1%, 23.8%) | 1.74            | 1.54                  | 1.97                  |               | 1.90               | 1.68                | 2.16                |               |
|                         | <b>4</b>                       | 6,145      | 2,520     | 41.0%      | (39.8%, 42.2%) | 4.16            | 3.73                  | 4.65                  |               | 4.41               | 3.94                | 4.94                |               |
|                         | <b>Unknown</b>                 | 870        | 290       | 33.3%      | (30.3%, 36.5%) | 3.13            | 2.64                  | 3.71                  |               | 2.71               | 2.26                | 3.24                |               |
| <b>Cancer site</b>      | <b>Oesophageal</b>             | 460        | 85        | 18.5%      | (15.2%, 22.3%) | 0.59            | 0.46                  | 0.75                  | <0.0001       | 0.49               | 0.38                | 0.62                | <0.0001       |
|                         | <b>Stomach</b>                 | 895        | 285       | 31.8%      | (28.9%, 35.0%) | 1.19            | 1.02                  | 1.39                  |               | 0.97               | 0.82                | 1.14                |               |
|                         | <b>Colon</b>                   | 4,470      | 1,240     | 27.7%      | (26.4%, 29.1%) | (ref)           | (ref)                 | (ref)                 |               | (ref)              | (ref)               | (ref)               |               |
|                         | <b>Rectal</b>                  | 1,820      | 250       | 13.7%      | (12.2%, 15.4%) | 0.41            | 0.35                  | 0.48                  |               | 0.42               | 0.36                | 0.49                |               |
|                         | <b>Liver</b>                   | 585        | 195       | 33.3%      | (29.6%, 37.3%) | 1.27            | 1.06                  | 1.53                  |               | 1.28               | 1.05                | 1.56                |               |
|                         | <b>Pancreatic</b>              | 1,300      | 485       | 37.3%      | (34.7%, 40.0%) | 1.56            | 1.37                  | 1.77                  |               | 1.08               | 0.94                | 1.24                |               |
|                         | <b>Lung</b>                    | 6,395      | 1,955     | 30.6%      | (29.5%, 31.7%) | 1.15            | 1.06                  | 1.25                  |               | 0.85               | 0.78                | 0.94                |               |
|                         | <b>Ovarian</b>                 | 730        | 220       | 30.1%      | (26.9%, 33.6%) | 1.12            | 0.94                  | 1.33                  |               | 1.21               | 1.00                | 1.45                |               |
| <b>New South Wales</b>  |                                | <b>All</b> | <b>EP</b> | <b>%EP</b> | <b>95% CI</b>  | <b>Crude OR</b> | <b>Crude OR (LCI)</b> | <b>Crude OR (UCI)</b> | <b>p(COR)</b> | <b>Adjusted OR</b> | <b>Adj OR (LCI)</b> | <b>Adj OR (UCI)</b> | <b>p(AOR)</b> |
|                         | <b>Total</b>                   | 53,198     | 16,445    | 30.9%      | (30.5%, 31.3%) |                 |                       |                       |               |                    |                     |                     |               |
| <b>Sex</b>              | <b>Male</b>                    | 29,037     | 8,925     | 30.7%      | (30.2%, 31.3%) | (ref)           | (ref)                 | (ref)                 | 0.34          | (ref)              | (ref)               | (ref)               | 0.83          |
|                         | <b>Female</b>                  | 24,161     | 7,520     | 31.1%      | (30.5%, 31.7%) | 1.02            | 0.98                  | 1.06                  |               | 1.00               | 0.96                | 1.04                |               |
| <b>Diagnosis year</b>   | <b>2012</b>                    | 10,361     | 3,294     | 31.8%      | (30.9%, 32.7%) | (ref)           | (ref)                 | (ref)                 | 0.045         | (ref)              | (ref)               | (ref)               | 0.010         |
|                         | <b>2013</b>                    | 10,368     | 3,197     | 30.8%      | (30.0%, 31.7%) | 0.96            | 0.90                  | 1.01                  |               | 0.97               | 0.91                | 1.03                |               |
|                         | <b>2014</b>                    | 10,432     | 3,112     | 29.8%      | (29.0%, 30.7%) | 0.91            | 0.86                  | 0.97                  |               | 0.93               | 0.88                | 0.99                |               |
|                         | <b>2015</b>                    | 10,903     | 3,390     | 31.1%      | (30.2%, 32.0%) | 0.97            | 0.91                  | 1.03                  |               | 1.02               | 0.96                | 1.09                |               |
|                         | <b>2016</b>                    | 11,134     | 3,452     | 31.0%      | (30.2%, 31.9%) | 0.96            | 0.91                  | 1.03                  |               | 1.02               | 0.96                | 1.09                |               |
| <b>Age group</b>        | <b>15-64</b>                   | 17,708     | 4,913     | 27.7%      | (27.1%, 28.4%) | 1.09            | 1.04                  | 1.14                  | <0.0001       | 1.11               | 1.06                | 1.17                | <0.0001       |
|                         | <b>65-74</b>                   | 16,085     | 4,190     | 26.0%      | (25.4%, 26.7%) | (ref)           | (ref)                 | (ref)                 |               | (ref)              | (ref)               | (ref)               |               |
|                         | <b>75-84</b>                   | 13,802     | 4,605     | 33.4%      | (32.6%, 34.2%) | 1.42            | 1.35                  | 1.49                  |               | 1.46               | 1.39                | 1.54                |               |
|                         | <b>85+</b>                     | 5,603      | 2,737     | 48.8%      | (47.5%, 50.2%) | 2.71            | 2.55                  | 2.89                  |               | 3.07               | 2.87                | 3.28                |               |
| <b>Stage</b>            | <b>Localised</b>               | 14,325     | 3,038     | 21.2%      | (20.5%, 21.9%) | (ref)           | (ref)                 | (ref)                 | <0.0001       | (ref)              | (ref)               | (ref)               | <0.0001       |
|                         | <b>Inv. adjc. tissue/organ</b> | 6,262      | 1,683     | 26.9%      | (25.8%, 28.0%) | 1.37            | 1.27                  | 1.46                  |               | 1.40               | 1.30                | 1.50                |               |
|                         | <b>Inv. regional LNs</b>       | 8,854      | 2,088     | 23.6%      | (22.7%, 24.5%) | 1.15            | 1.08                  | 1.22                  |               | 1.26               | 1.18                | 1.35                |               |
|                         | <b>Distant metastasis</b>      | 17,181     | 8,023     | 46.7%      | (46.0%, 47.4%) | 3.25            | 3.10                  | 3.42                  |               | 3.19               | 3.02                | 3.36                |               |
|                         | <b>Unknown</b>                 | 6,576      | 1,613     | 24.5%      | (23.5%, 25.6%) | 1.21            | 1.13                  | 1.29                  |               | 1.03               | 0.96                | 1.11                |               |
| <b>Cancer site</b>      | <b>Oesophageal</b>             | 1,970      | 530       | 26.9%      | (25.0%, 28.9%) | 0.97            | 0.87                  | 1.07                  | <0.0001       | 0.94               | 0.84                | 1.05                | <0.0001       |
|                         | <b>Stomach</b>                 | 3,179      | 969       | 30.5%      | (28.9%, 32.1%) | 1.15            | 1.06                  | 1.25                  |               | 1.08               | 0.99                | 1.18                |               |
|                         | <b>Colon</b>                   | 16,316     | 4,499     | 27.6%      | (26.9%, 28.3%) | (ref)           | (ref)                 | (ref)                 |               | (ref)              | (ref)               | (ref)               |               |
|                         | <b>Rectal</b>                  | 5,459      | 660       | 12.1%      | (11.3%, 13.0%) | 0.36            | 0.33                  | 0.39                  |               | 0.41               | 0.37                | 0.45                |               |
|                         | <b>Liver</b>                   | 3,155      | 1,161     | 36.8%      | (35.1%, 38.5%) | 1.53            | 1.41                  | 1.66                  |               | 1.91               | 1.75                | 2.08                |               |
|                         | <b>Pancreatic</b>              | 4,498      | 2,036     | 45.3%      | (43.8%, 46.7%) | 2.17            | 2.03                  | 2.32                  |               | 1.74               | 1.62                | 1.87                |               |
|                         | <b>Lung</b>                    | 16,334     | 5,941     | 36.4%      | (35.6%, 37.1%) | 1.50            | 1.43                  | 1.57                  |               | 1.26               | 1.19                | 1.32                |               |
|                         | <b>Ovarian</b>                 | 2,287      | 649       | 28.4%      | (26.6%, 30.3%) | 1.04            | 0.94                  | 1.15                  |               | 0.72               | 0.64                | 0.79                |               |

| Victoria              |                                | All    | EP     | %EP   | 95% CI         | Crude OR | Crude OR (LCI) | Crude OR (UCI) | p(COR)  | Adjusted OR | Adj OR (LCI) | Adj OR (UCI) | p(AOR)  |
|-----------------------|--------------------------------|--------|--------|-------|----------------|----------|----------------|----------------|---------|-------------|--------------|--------------|---------|
|                       | <b>Total</b>                   | 38,212 | 9,165  | 24.0% | (23.6%, 24.4%) |          |                |                |         |             |              |              |         |
| <b>Sex</b>            | <b>Male</b>                    | 20,720 | 4,980  | 24.0% | (23.5%, 24.6%) | (ref)    | (ref)          | (ref)          | 0.80    | (ref)       | (ref)        | (ref)        | 0.13    |
|                       | <b>Female</b>                  | 17,492 | 4,185  | 23.9% | (23.3%, 24.6%) | 0.99     | 0.95           | 1.04           |         | 0.96        | 0.91         | 1.01         |         |
| <b>Diagnosis year</b> | <b>2012</b>                    | 7,045  | 1,615  | 22.9% | (22.0%, 23.9%) | (ref)    | (ref)          | (ref)          | 0.00024 | (ref)       | (ref)        | (ref)        | 0.0040  |
|                       | <b>2013</b>                    | 7,232  | 1,638  | 22.6% | (21.7%, 23.6%) | 0.98     | 0.91           | 1.06           |         | 0.99        | 0.91         | 1.07         |         |
|                       | <b>2014</b>                    | 7,646  | 1,832  | 24.0% | (23.0%, 24.9%) | 1.06     | 0.98           | 1.14           |         | 1.03        | 0.95         | 1.11         |         |
|                       | <b>2015</b>                    | 7,961  | 1,998  | 25.1% | (24.2%, 26.1%) | 1.13     | 1.05           | 1.21           |         | 1.11        | 1.02         | 1.20         |         |
|                       | <b>2016</b>                    | 8,328  | 2,082  | 25.5% | (24.1%, 25.9%) | 1.12     | 1.04           | 1.21           |         | 1.10        | 1.02         | 1.19         |         |
| <b>Age group</b>      | <b>15-64</b>                   | 12,568 | 2,618  | 20.8% | (20.1%, 21.5%) | 1.04     | 0.98           | 1.11           | <0.0001 | 1.05        | 0.99         | 1.13         | <0.0001 |
|                       | <b>65-74</b>                   | 11,016 | 2,226  | 20.2% | (19.5%, 21.0%) | (ref)    | (ref)          | (ref)          |         | (ref)       | (ref)        | (ref)        |         |
|                       | <b>75-84</b>                   | 10,188 | 2,653  | 26.0% | (25.2%, 26.9%) | 1.39     | 1.30           | 1.48           |         | 1.38        | 1.29         | 1.47         |         |
|                       | <b>85+</b>                     | 4,440  | 1,668  | 37.6% | (36.2%, 39.0%) | 2.38     | 2.2            | 2.56           |         | 2.29        | 2.11         | 2.47         |         |
| <b>Stage*</b>         | <b>Localised</b>               | 3,587  | 193    | 5.4%  | (4.7%, 6.2%)   | (ref)    | (ref)          | (ref)          | <0.0001 | (ref)       | (ref)        | (ref)        | <0.0001 |
|                       | <b>Inv. adjc. tissue/organ</b> | 4,011  | 710    | 17.7% | (16.6%, 18.9%) | 3.78     | 3.21           | 4.48           |         | 3.25        | 2.76         | 3.86         |         |
|                       | <b>Inv. regional LNs</b>       | 3,708  | 704    | 19.0% | (17.8%, 20.3%) | 4.12     | 3.5            | 4.88           |         | 3.90        | 3.30         | 4.63         |         |
|                       | <b>Distant metastasis</b>      | 2,727  | 903    | 33.1% | (31.4%, 34.9%) | 8.71     | 7.39           | 10.3           |         | 8.21        | 6.95         | 9.73         |         |
|                       | <b>Unknown ^</b>               | 24,146 | 6,651  | 27.5% | (27.0%, 28.1%) | 6.69     | 5.78           | 7.77           |         | 7.00        | 5.87         | 8.38         |         |
| <b>Cancer site</b>    | <b>Oesophageal</b>             | 1,576  | 315    | 20.0% | (18.1%, 22.0%) | 0.84     | 0.74           | 0.96           | <0.0001 | 0.47        | 0.40         | 0.55         | <0.0001 |
|                       | <b>Stomach</b>                 | 2,597  | 616    | 23.7% | (22.1%, 25.4%) | 1.05     | 0.95           | 1.16           |         | 0.59        | 0.51         | 0.68         |         |
|                       | <b>Colon</b>                   | 11,747 | 2,689  | 22.9% | (22.1%, 23.7%) | (ref)    | (ref)          | (ref)          |         | (ref)       | (ref)        | (ref)        |         |
|                       | <b>Rectal</b>                  | 4,438  | 403    | 9.1%  | (8.3%, 10.0%)  | 0.34     | 0.30           | 0.38           |         | 0.34        | 0.30         | 0.38         |         |
|                       | <b>Liver</b>                   | 2,323  | 742    | 31.9% | (30.1%, 33.9%) | 1.58     | 1.43           | 1.74           |         | 0.93        | 0.81         | 1.07         |         |
|                       | <b>Pancreatic</b>              | 3,172  | 1,083  | 34.1% | (32.5%, 35.8%) | 1.75     | 1.60           | 1.90           |         | 0.97        | 0.85         | 1.10         |         |
|                       | <b>Lung</b>                    | 10,620 | 2,954  | 27.8% | (27.0%, 28.7%) | 1.30     | 1.22           | 1.38           |         | 0.74        | 0.66         | 0.83         |         |
|                       | <b>Ovarian</b>                 | 1,739  | 363    | 20.9% | (19.0%, 22.8%) | 0.89     | 0.78           | 1.00           |         | 0.55        | 0.47         | 0.65         |         |
|                       |                                |        |        |       |                |          |                |                |         |             |              |              |         |
| New Zealand           |                                | All    | EP     | %EP   | 95% CI         | Crude OR | Crude OR (LCI) | Crude OR (UCI) | p(COR)  | Adjusted OR | Adj OR (LCI) | Adj OR (UCI) | p(AOR)  |
|                       | <b>Total</b>                   | 28,794 | 12,238 | 42.5% | (41.9%, 43.1%) |          |                |                |         |             |              |              |         |
| <b>Sex</b>            | <b>Male</b>                    | 14,751 | 6,164  | 41.8% | (41.0%, 42.6%) | (ref)    | (ref)          | (ref)          | 0.012   | (ref)       | (ref)        | (ref)        | 0.66    |
|                       | <b>Female</b>                  | 14,043 | 6,074  | 43.3% | (42.4%, 44.1%) | 1.06     | 1.01           | 1.11           |         | 0.99        | 0.94         | 1.04         |         |
| <b>Diagnosis year</b> | <b>2012</b>                    | 6,961  | 2,917  | 41.9% | (40.8%, 43.1%) | (ref)    | (ref)          | (ref)          | 0.25    | (ref)       | (ref)        | (ref)        | 0.21    |
|                       | <b>2013</b>                    | 6,994  | 3,009  | 43.0% | (41.9%, 44.2%) | 1.05     | 0.98           | 1.12           |         | 1.06        | 0.99         | 1.14         |         |
|                       | <b>2014</b>                    | 7,447  | 3,122  | 41.9% | (40.8%, 43.0%) | 1.00     | 0.94           | 1.07           |         | 1.02        | 0.95         | 1.09         |         |
|                       | <b>2015</b>                    | 7,392  | 3,190  | 43.2% | (42.0%, 44.3%) | 1.05     | 0.99           | 1.12           |         | 1.07        | 0.99         | 1.15         |         |
| <b>Age group</b>      | <b>15-64</b>                   | 8,819  | 3,622  | 41.1% | (40.0%, 42.1%) | 1.08     | 1.01           | 1.14           | <0.0001 | 1.06        | 1.00         | 1.14         | <0.0001 |
|                       | <b>65-74</b>                   | 8,785  | 3,452  | 39.3% | (38.3%, 40.3%) | (ref)    | (ref)          | (ref)          |         | (ref)       | (ref)        | (ref)        |         |
|                       | <b>75-84</b>                   | 7,887  | 3,426  | 43.4% | (42.3%, 44.5%) | 1.19     | 1.12           | 1.26           |         | 1.27        | 1.19         | 1.36         |         |
|                       | <b>85+</b>                     | 3,303  | 1,738  | 52.6% | (50.9%, 54.3%) | 1.72     | 1.58           | 1.86           |         | 1.86        | 1.71         | 2.03         |         |
| <b>Stage</b>          | <b>Localised</b>               | 3,893  | 661    | 17.0% | (15.8%, 18.2%) | 0.12     | 0.11           | 0.13           | <0.0001 | 0.15        | 0.13         | 0.16         | <0.0001 |
|                       | <b>Inv. adjc. tissue/organ</b> | 2,421  | 793    | 32.8% | (30.9%, 34.7%) | 0.29     | 0.26           | 0.32           |         | 0.33        | 0.30         | 0.37         |         |
|                       | <b>Inv. regional LNs</b>       | 4,213  | 1,545  | 36.7% | (35.2%, 38.1%) | 0.34     | 0.32           | 0.37           |         | 0.4         | 0.37         | 0.44         |         |
|                       | <b>Distant metastasis</b>      | 9,766  | 6,130  | 62.8% | (61.8%, 63.7%) | (ref)    | (ref)          | (ref)          |         | (ref)       | (ref)        | (ref)        |         |
|                       | <b>Unknown</b>                 | 8,501  | 3,109  | 36.6% | (35.6%, 37.6%) | 0.34     | 0.32           | 0.36           |         | 0.35        | 0.32         | 0.37         |         |
| <b>Cancer site</b>    | <b>Oesophageal</b>             | 1,196  | 440    | 36.8% | (34.1%, 39.6%) | 1.01     | 0.89           | 1.14           | <0.0001 | 0.86        | 0.75         | 0.99         | <0.0001 |
|                       | <b>Stomach</b>                 | 1,520  | 726    | 47.8% | (45.3%, 50.3%) | 1.58     | 1.42           | 1.76           |         | 1.35        | 1.20         | 1.52         |         |
|                       | <b>Colon</b>                   | 9,502  | 3,480  | 36.6% | (35.7%, 37.6%) | (ref)    | (ref)          | (ref)          |         | (ref)       | (ref)        | (ref)        |         |
|                       | <b>Rectal</b>                  | 3,247  | 643    | 19.8% | (18.5%, 21.2%) | 0.43     | 0.39           | 0.47           |         | 0.45        | 0.41         | 0.50         |         |
|                       | <b>Liver</b>                   | 1,243  | 618    | 49.7% | (46.9%, 52.5%) | 1.71     | 1.52           | 1.93           |         | 1.76        | 1.55         | 2.01         |         |
|                       | <b>Pancreatic</b>              | 2,182  | 1,317  | 60.4% | (58.3%, 62.4%) | 2.63     | 2.40           | 2.90           |         | 1.78        | 1.60         | 1.97         |         |
|                       | <b>Lung</b>                    | 8,481  | 4,330  | 51.1% | (50.0%, 52.1%) | 1.81     | 1.70           | 1.92           |         | 1.38        | 1.29         | 1.48         |         |
|                       | <b>Ovarian</b>                 | 1,423  | 684    | 48.1% | (45.5%, 50.7%) | 1.60     | 1.43           | 1.79           |         | 1.07        | 0.95         | 1.22         |         |

All: All patients; EP: Emergency Presentation; OR: Odds ratio; LCI: Lower confidence interval; UCI: Upper confidence interval; COR: Crude odds ratio; AOR: Adjusted odds ratio; Inv: Invading; Adj: Adjacent; LNs: Lymph Nodes; Ref: Reference category.

\* Data shown for stage categories in Victoria does not include 33 cases in groups other than shown.

^ For British Columbia the unknown stage category includes all cases other than colon, rectal and lung, and the proportion of cases with the latter three cancers with unknown stage. For Victoria, the unknown stage category includes all cases other than colon and rectal, and the proportion of cases with the latter two cancers with unknown stage.

§ For Atlantic Canada, British Columbia, and Saskatchewan-Manitoba, random rounding within cells to a multiple of 5 was used for the tabulated variable groups, to adhere to rules for minimising residual disclosure risk.

**Supplementary Material 8. Meta-analysis of associations between patient-level variables (cancer site, age group, sex) and risk of emergency presentation (defined as diagnosis of cancer within 30 days after an emergency hospital admission) adjusted for emergency presentation broad/narrow definition subtype**

Across the graphics, superscript indicators ‘n’ and ‘b’ after jurisdictional names describe whether a narrow or broad operational definition of emergency presentation was used – please also see main paper-Methods, and appendix pp.4-5.

**A. Meta-analysis of risk of emergency presentation by cancer site**

*Oesophageal vs Colon (reference)*

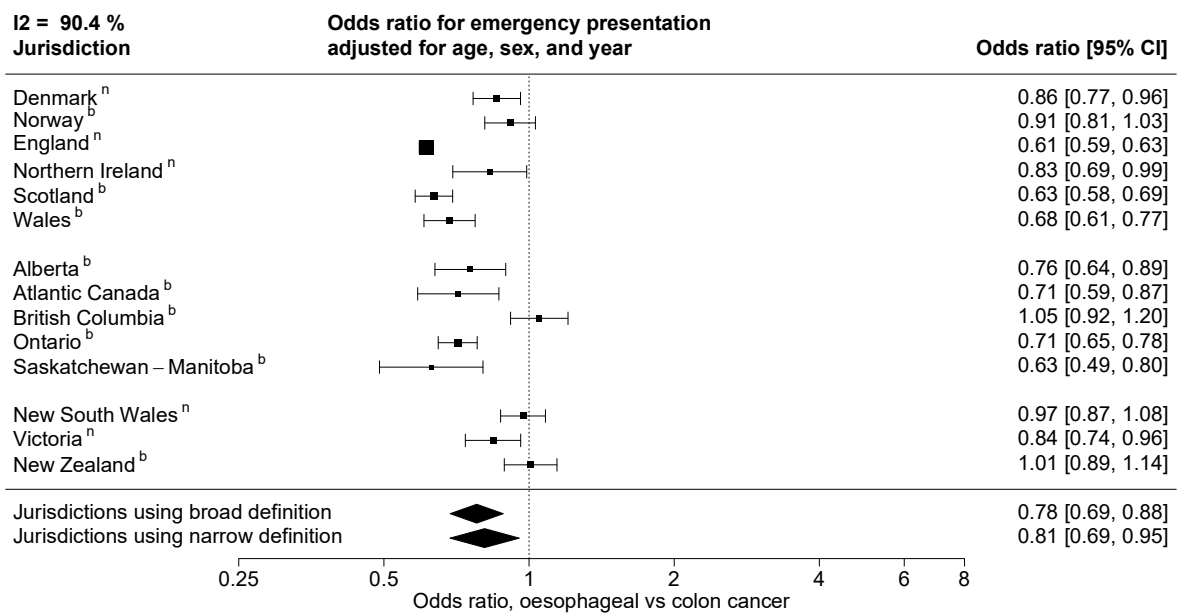

*Stomach vs Colon (reference)*

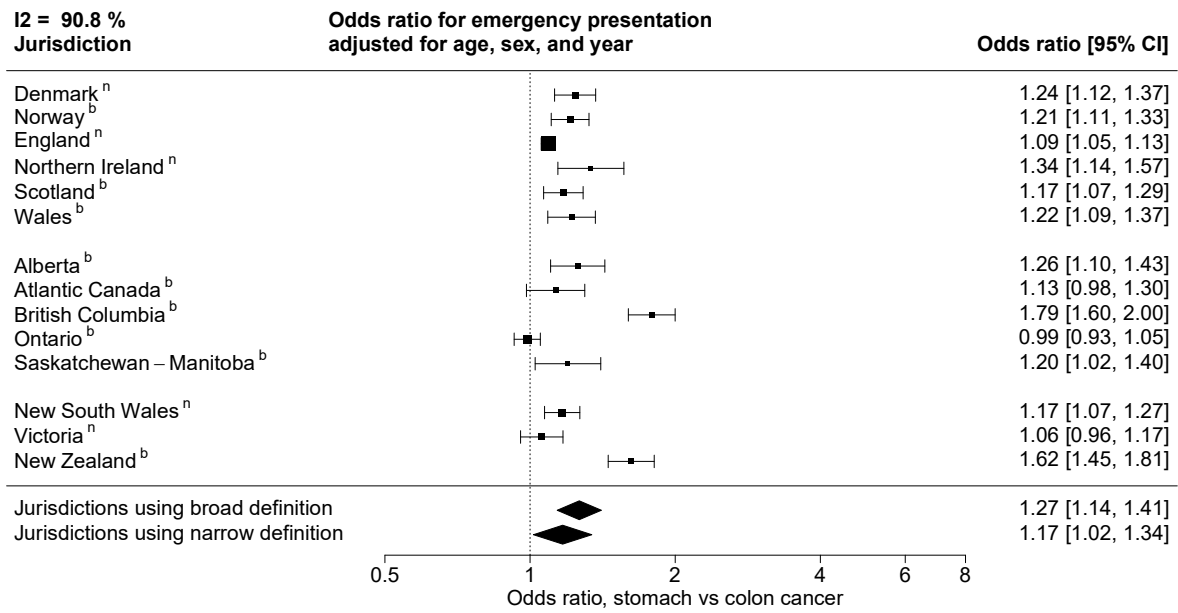

*Rectal vs Colon (reference)*

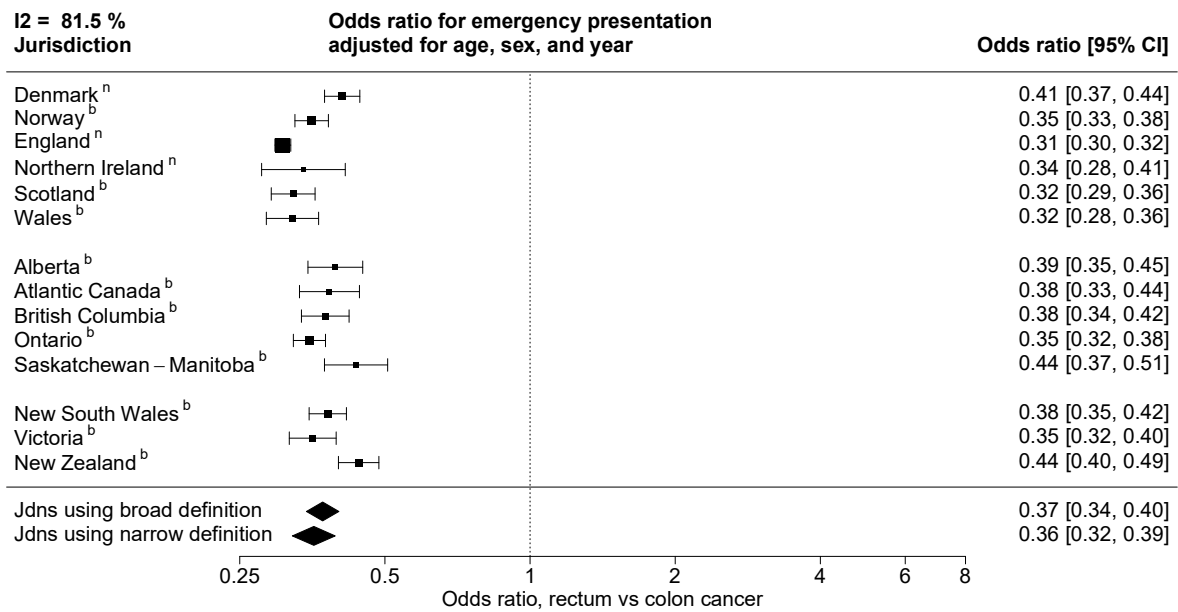

Liver vs. Colon (reference)

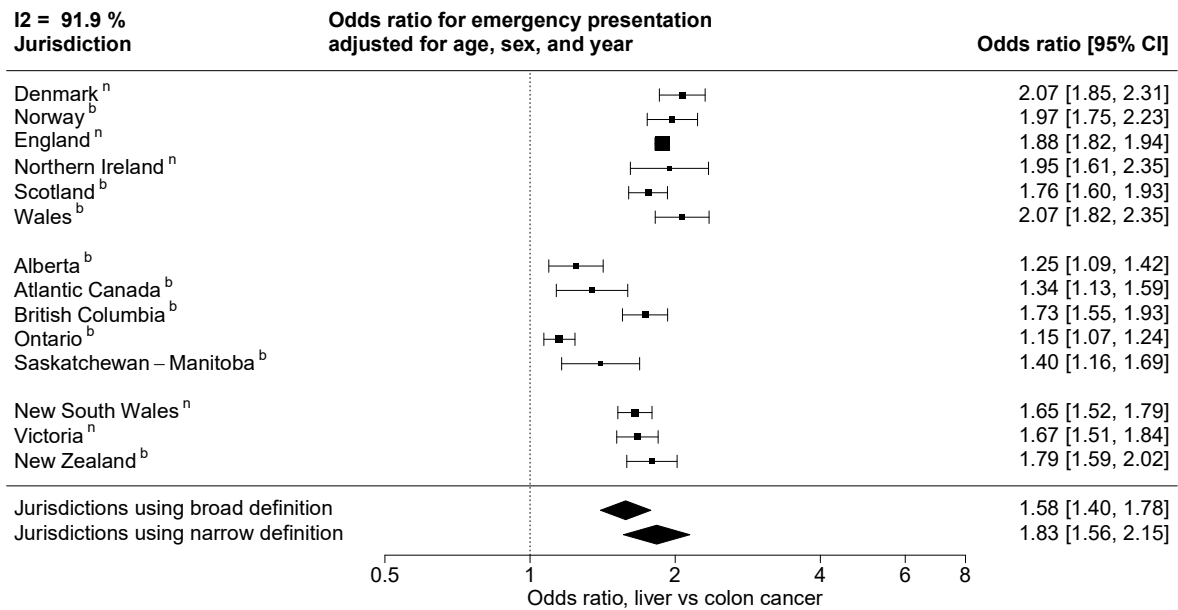

Pancreatic vs. Colon (reference)

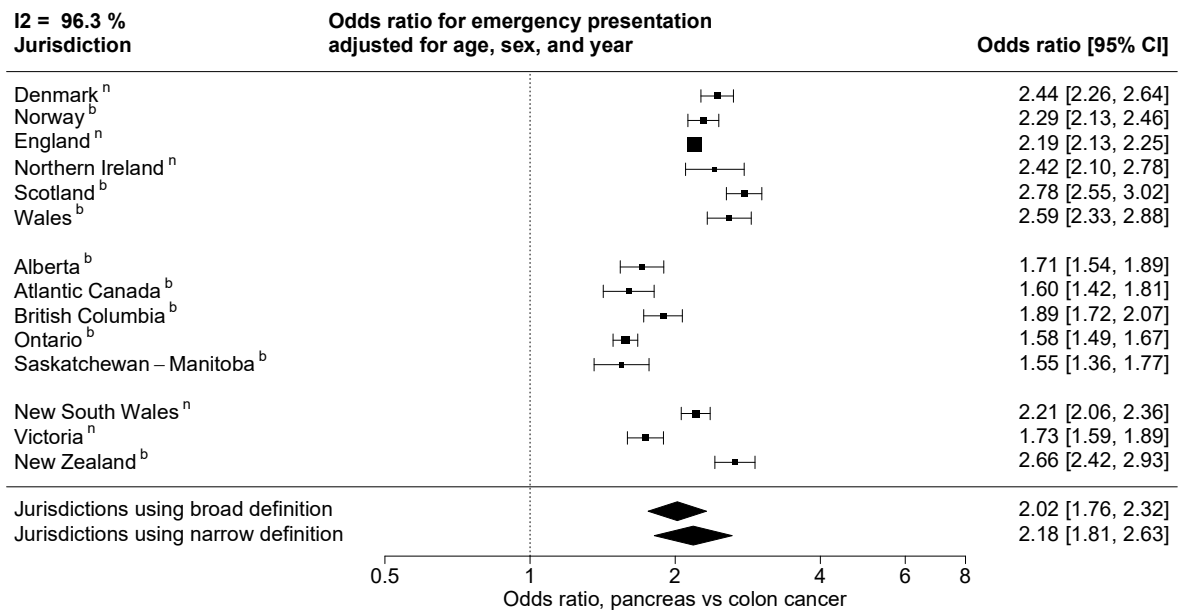

Lung vs. Colon (reference)

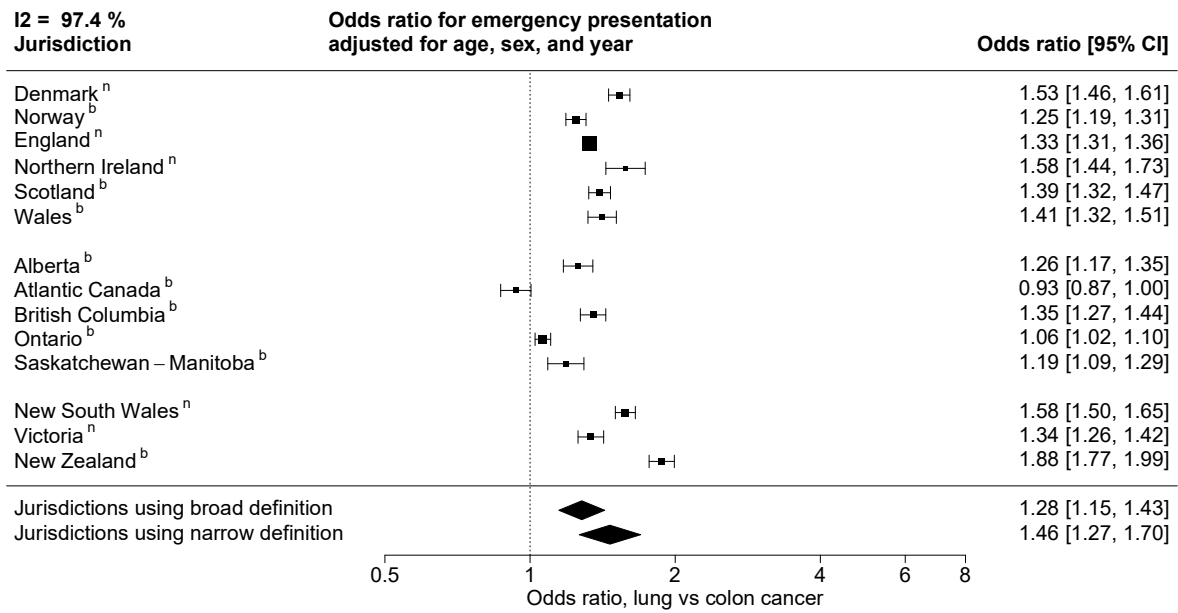

Ovarian vs. Colon (reference)

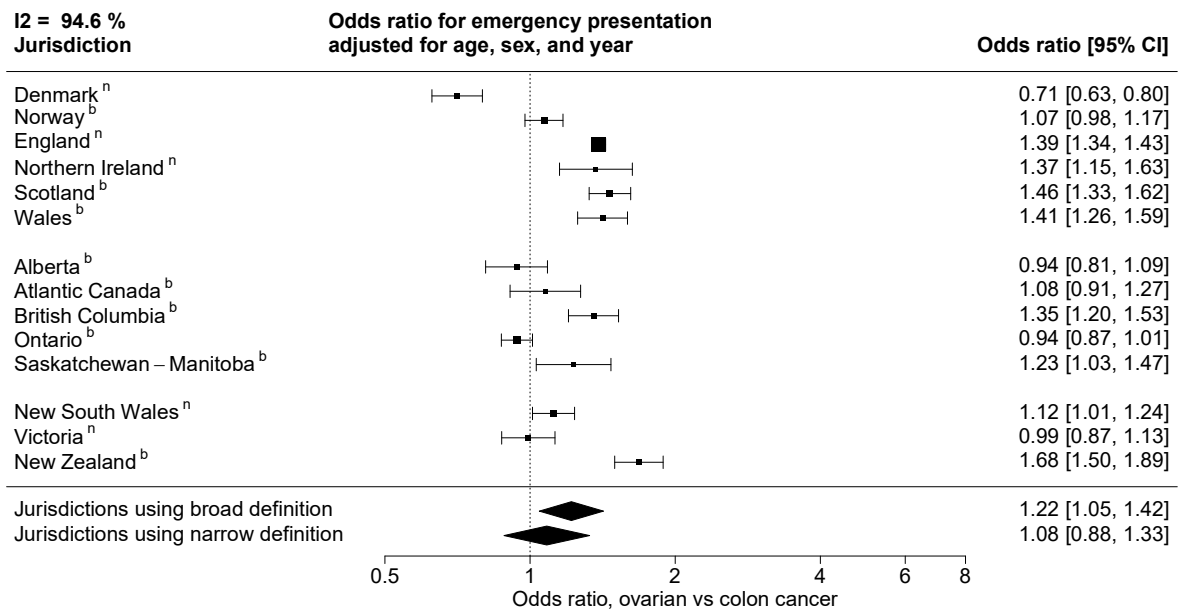



## B. Meta-analysis of risk of emergency presentation by age group

15-64 vs 65-74 (reference)

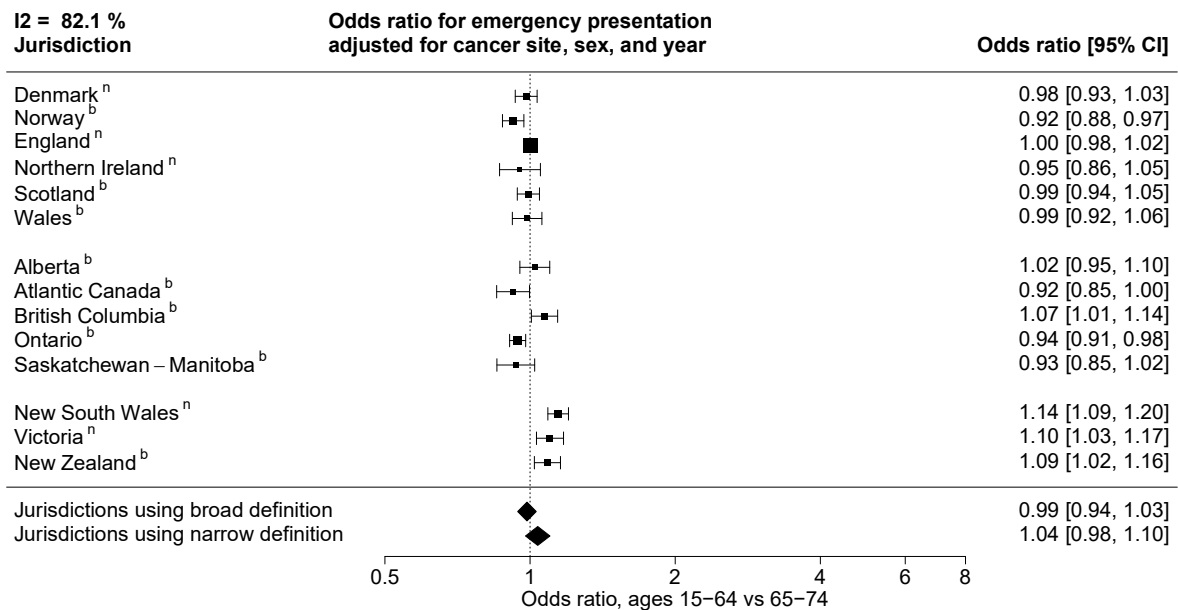

75-84 vs 65-74 (reference)

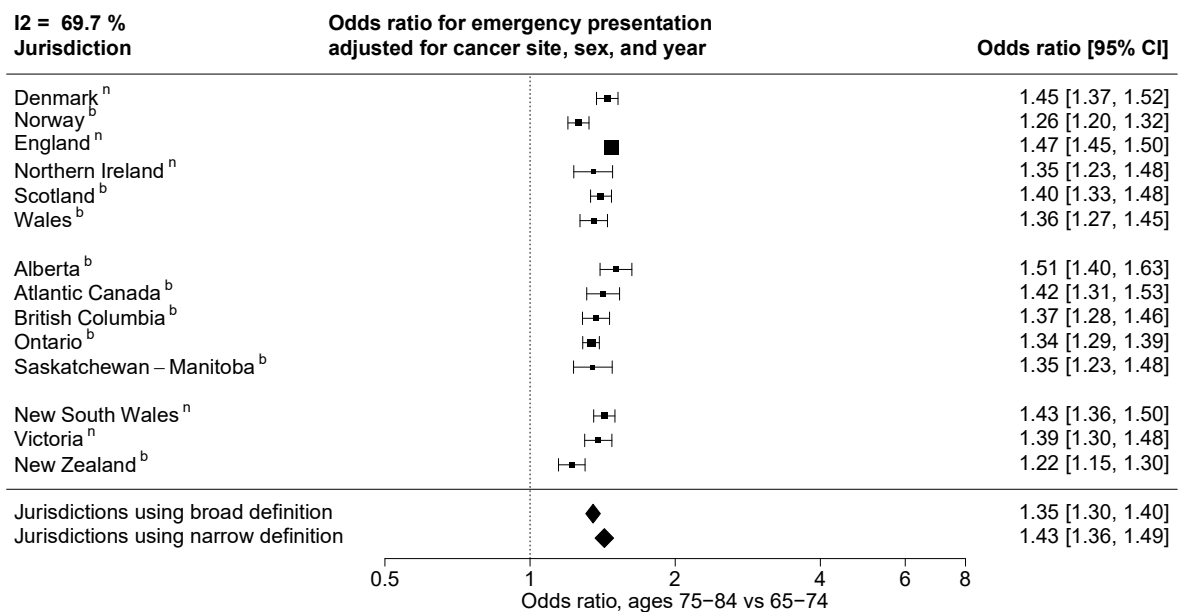

85-99 vs 65-74 (reference)

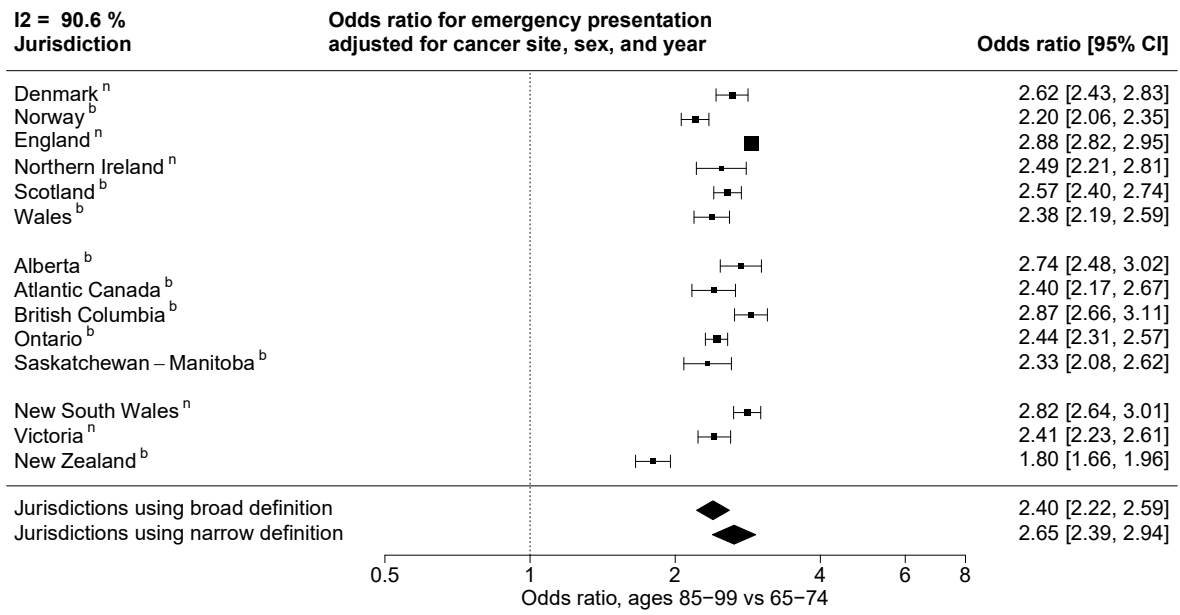

### C. Meta-analysis of risk of emergency presentation by sex

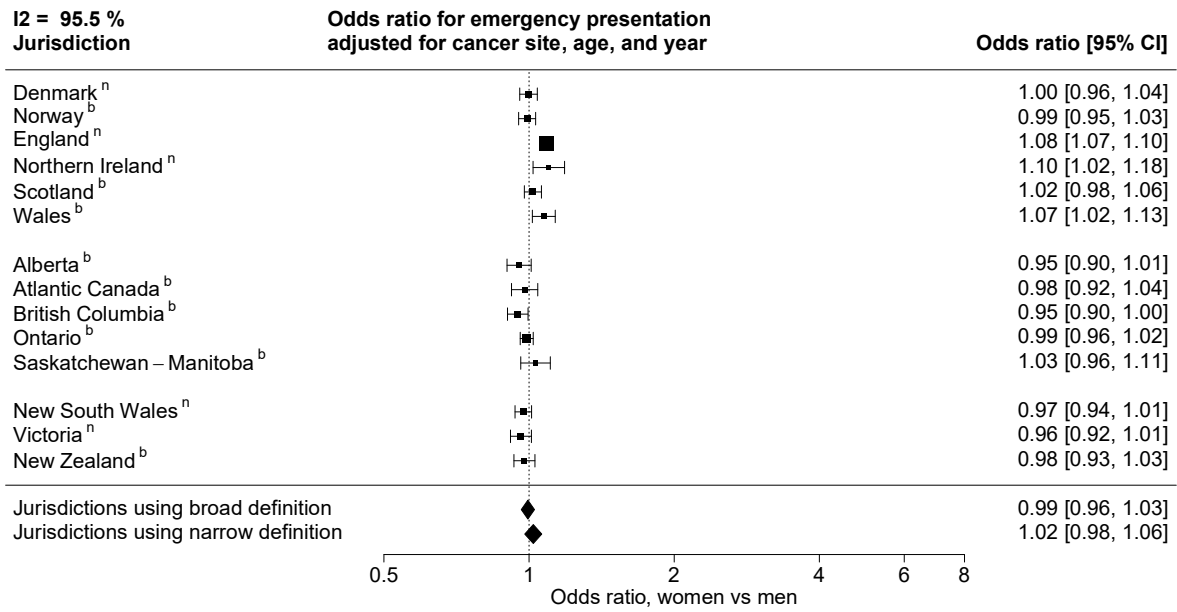



| B.                    | Liver     |            |          |          |                   | Pancreatic |            |          |          |                   | Lung      |            |          |          |                   | Ovarian   |            |          |          |                   |
|-----------------------|-----------|------------|----------|----------|-------------------|------------|------------|----------|----------|-------------------|-----------|------------|----------|----------|-------------------|-----------|------------|----------|----------|-------------------|
|                       | Mortality |            |          | Crude OR | 95% CI (LCI, UCI) | Mortality  |            |          | Crude OR | 95% CI (LCI, UCI) | Mortality |            |          | Crude OR | 95% CI (LCI, UCI) | Mortality |            |          | Crude OR | 95% CI (LCI, UCI) |
|                       | EP (%)    | non-EP (%) | Diff (%) |          |                   | EP (%)     | non-EP (%) | Diff (%) |          |                   | EP (%)    | non-EP (%) | Diff (%) |          |                   | EP (%)    | non-EP (%) | Diff (%) |          |                   |
| <b>1-month</b>        |           |            |          |          |                   |            |            |          |          |                   |           |            |          |          |                   |           |            |          |          |                   |
| Denmark               | 28        | 5          | 23       | 7.49     | (5.29, 10.59)     | 27         | 10         | 17       | 3.37     | (2.78, 4.07)      | 22        | 4          | 18       | 6.12     | (5.46, 6.85)      | 13        | 2          | 12       | 9.68     | (5.89, 15.91)     |
| Norway                | 37        | 13         | 25       | 4.08     | (3.04, 5.48)      | 33         | 14         | 19       | 3.08     | (2.61, 3.65)      | 25        | 5          | 20       | 6.06     | (5.42, 6.79)      | 14        | 2          | 12       | 9.56     | (6.29, 14.53)     |
| England               | 35        | 9          | 26       | 5.63     | (5.18, 6.12)      | 37         | 13         | 24       | 4.04     | (3.82, 4.28)      | 37        | 8          | 29       | 6.66     | (6.45, 6.86)      | 20        | 3          | 17       | 7.01     | (6.29, 7.82)      |
| Northern Ireland      | 40        | 9          | 31       | 6.75     | (4.30, 10.58)     | 43         | 12         | 30       | 5.24     | (3.92, 7.01)      | 35        | 7          | 28       | 6.93     | (5.94, 8.09)      | 19        | 5          | 14       | 4.46     | (2.71, 7.35)      |
| Scotland              | 24        | 4          | 19       | 6.65     | (4.91, 9.01)      | 25         | 10         | 15       | 3.05     | (2.46, 3.77)      | 25        | 6          | 19       | 5.45     | (4.95, 6.00)      | 14        | 4          | 10       | 4.20     | (2.96, 5.95)      |
| Wales                 | 28        | 7          | 21       | 5.21     | (3.60, 7.53)      | 29         | 13         | 16       | 2.78     | (2.19, 3.53)      | 30        | 6          | 24       | 6.66     | (5.84, 7.59)      | 14        | 3          | 11       | 5.93     | (3.73, 9.43)      |
| Alberta               | 34        | 7          | 27       | 6.92     | (4.78, 10.00)     | 29         | 9          | 20       | 4.04     | (3.08, 5.31)      | 25        | 7          | 19       | 4.84     | (4.19, 5.59)      | 8         | 3          | 5        | 2.56     | (1.36, 4.85)      |
| Atlantic Canada       | 35        | 12         | 23       | 4.05     | (2.73, 6.01)      | 34         | 13         | 21       | 3.34     | (2.57, 4.33)      | 30        | 7          | 23       | 5.44     | (4.80, 6.17)      | 26        | 3          | 23       | 10.24    | (5.94, 17.63)     |
| British Columbia      | 35        | 8          | 27       | 5.94     | (4.55, 7.75)      | 30         | 11         | 19       | 3.42     | (2.79, 4.20)      | 31        | 6          | 24       | 6.73     | (6.02, 7.53)      | 16        | 3          | 13       | 6.22     | (4.08, 9.48)      |
| Ontario               | 16        | 4          | 12       | 4.55     | (3.58, 5.79)      | 18         | 6          | 12       | 3.55     | (3.00, 4.21)      | 20        | 4          | 16       | 5.83     | (5.39, 6.31)      | 14        | 2          | 13       | 10.31    | (7.60, 13.99)     |
| Saskatchewan-Manitoba | 33        | 11         | 23       | 4.25     | (2.74, 6.60)      | 33         | 10         | 24       | 4.69     | (3.47, 6.32)      | 30        | 7          | 23       | 5.71     | (4.91, 6.64)      | 18        | 4          | 14       | 5.44     | (3.10, 9.56)      |
| New South Wales       | 27        | 5          | 22       | 7.09     | (5.57, 9.03)      | 20         | 6          | 14       | 3.99     | (3.27, 4.86)      | 20        | 4          | 16       | 6.46     | (5.73, 7.28)      | 14        | 2          | 13       | 10.11    | (6.52, 15.67)     |
| Victoria              | 23        | 6          | 17       | 4.91     | (3.73, 6.46)      | 26         | 7          | 19       | 4.68     | (3.76, 5.82)      | 22        | 5          | 17       | 5.65     | (4.92, 6.48)      | 14        | 2          | 12       | 8.17     | (5.04, 13.23)     |
| New Zealand           | 23        | 4          | 20       | 8.33     | (5.23, 13.25)     | 22         | 6          | 16       | 4.08     | (3.02, 5.51)      | 22        | 4          | 18       | 7.11     | (5.96, 8.48)      | 11        | 1          | 9        | 7.79     | (4.09, 14.82)     |
| <b>3-month</b>        |           |            |          |          |                   |            |            |          |          |                   |           |            |          |          |                   |           |            |          |          |                   |
| Denmark               | 56        | 19         | 37       | 5.55     | (4.41, 6.98)      | 54         | 26         | 28       | 3.28     | (2.85, 3.78)      | 43        | 15         | 27       | 4.13     | (3.83, 4.45)      | 26        | 5          | 21       | 6.73     | (4.87, 9.30)      |
| Norway                | 55        | 22         | 33       | 4.42     | (3.43, 5.70)      | 57         | 27         | 30       | 3.57     | (3.11, 4.10)      | 46        | 13         | 33       | 5.75     | (5.30, 6.24)      | 23        | 5          | 18       | 5.31     | (4.09, 6.91)      |
| England               | 61        | 23         | 38       | 5.31     | (4.97, 5.66)      | 65         | 35         | 31       | 3.55     | (3.38, 3.72)      | 63        | 22         | 41       | 6.16     | (6.01, 6.31)      | 37        | 8          | 28       | 6.26     | (5.79, 6.76)      |
| Northern Ireland      | 71        | 25         | 46       | 7.27     | (4.99, 10.60)     | 74         | 32         | 42       | 5.97     | (4.61, 7.73)      | 66        | 22         | 45       | 7.21     | (6.38, 8.16)      | 40        | 12         | 28       | 5.07     | (3.53, 7.27)      |
| Scotland              | 52        | 16         | 36       | 5.72     | (4.72, 6.94)      | 56         | 32         | 24       | 2.72     | (2.34, 3.17)      | 53        | 20         | 32       | 4.38     | (4.11, 4.68)      | 31        | 10         | 22       | 4.19     | (3.31, 5.29)      |
| Wales                 | 59        | 22         | 37       | 5.18     | (4.00, 6.71)      | 57         | 35         | 22       | 2.47     | (2.05, 2.97)      | 57        | 20         | 38       | 5.51     | (5.03, 6.05)      | 27        | 8          | 20       | 4.44     | (3.30, 5.96)      |
| Alberta               | 57        | 19         | 38       | 5.69     | (4.27, 7.57)      | 58         | 28         | 30       | 3.47     | (2.83, 4.27)      | 51        | 18         | 33       | 4.76     | (4.28, 5.30)      | 24        | 7          | 18       | 4.50     | (2.96, 6.86)      |
| Atlantic Canada       | 65        | 29         | 37       | 4.69     | (3.34, 6.57)      | 59         | 34         | 24       | 2.73     | (2.20, 3.40)      | 56        | 19         | 37       | 5.40     | (4.88, 5.97)      | 39        | 10         | 29       | 5.89     | (4.02, 8.65)      |
| British Columbia      | 61        | 23         | 38       | 5.10     | (4.14, 6.29)      | 59         | 32         | 27       | 3.10     | (2.64, 3.64)      | 57        | 18         | 38       | 5.75     | (5.29, 6.25)      | 30        | 4          | 26       | 10.29    | (7.20, 14.69)     |
| Ontario               | 42        | 13         | 29       | 4.72     | (4.03, 5.52)      | 42         | 23         | 18       | 2.35     | (2.11, 2.62)      | 48        | 15         | 32       | 5.07     | (4.81, 5.34)      | 29        | 5          | 23       | 7.44     | (6.13, 9.02)      |
| Saskatchewan-Manitoba | 52        | 29         | 23       | 2.70     | (1.89, 3.86)      | 62         | 35         | 27       | 3.09     | (2.45, 3.90)      | 54        | 21         | 34       | 4.60     | (4.10, 5.16)      | 33        | 4          | 29       | 12.00    | (7.10, 20.27)     |
| New South Wales       | 50        | 14         | 36       | 6.20     | (5.22, 7.35)      | 46         | 22         | 24       | 3.06     | (2.69, 3.48)      | 44        | 14         | 30       | 4.86     | (4.51, 5.25)      | 24        | 4          | 20       | 7.73     | (5.70, 10.48)     |
| Victoria              | 42        | 15         | 28       | 4.31     | (3.52, 5.27)      | 44         | 22         | 22       | 2.83     | (2.42, 3.32)      | 45        | 14         | 31       | 5.03     | (4.56, 5.54)      | 24        | 4          | 20       | 7.04     | (4.93, 10.04)     |
| New Zealand           | 50        | 12         | 38       | 7.06     | (5.31, 9.38)      | 50         | 28         | 22       | 2.53     | (2.11, 3.04)      | 47        | 14         | 34       | 5.62     | (5.05, 6.25)      | 22        | 5          | 17       | 5.70     | (3.88, 8.37)      |
| <b>12-month</b>       |           |            |          |          |                   |            |            |          |          |                   |           |            |          |          |                   |           |            |          |          |                   |
| Denmark               | 81        | 48         | 33       | 4.59     | (3.63, 5.80)      | 81         | 60         | 21       | 2.85     | (2.44, 3.33)      | 71        | 43         | 27       | 3.15     | (2.94, 3.38)      | 47        | 15         | 32       | 5.10     | (4.00, 6.50)      |
| Norway                | 75        | 43         | 32       | 3.98     | (3.10, 5.10)      | 84         | 57         | 27       | 4.03     | (3.45, 4.69)      | 77        | 39         | 38       | 5.33     | (4.95, 5.75)      | 37        | 11         | 25       | 4.56     | (3.73, 5.58)      |
| England               | 84        | 52         | 32       | 4.85     | (4.51, 5.22)      | 89         | 69         | 20       | 3.59     | (3.37, 3.81)      | 86        | 52         | 34       | 5.70     | (5.54, 5.87)      | 54        | 19         | 35       | 4.95     | (4.65, 5.28)      |
| Northern Ireland      | 87        | 53         | 34       | 6.14     | (3.91, 9.66)      | 93         | 68         | 26       | 6.69     | (4.53, 9.87)      | 90        | 56         | 34       | 7.21     | (6.11, 8.50)      | 56        | 26         | 30       | 3.59     | (2.62, 4.91)      |
| Scotland              | 80        | 44         | 36       | 5.20     | (4.32, 6.26)      | 83         | 69         | 14       | 2.20     | (1.85, 2.62)      | 81        | 52         | 29       | 3.84     | (3.59, 4.11)      | 49        | 21         | 28       | 3.58     | (2.96, 4.33)      |
| Wales                 | 84        | 53         | 31       | 4.65     | (3.53, 6.12)      | 83         | 68         | 15       | 2.33     | (1.88, 2.88)      | 83        | 53         | 30       | 4.31     | (3.90, 4.76)      | 40        | 16         | 25       | 3.67     | (2.89, 4.65)      |
| Alberta               | 80        | 38         | 41       | 6.32     | (4.66, 8.59)      | 85         | 64         | 21       | 3.13     | (2.45, 4.01)      | 78        | 45         | 33       | 4.24     | (3.80, 4.73)      | 47        | 20         | 27       | 3.50     | (2.56, 4.80)      |
| Atlantic Canada       | 83        | 52         | 31       | 4.57     | (3.09, 6.74)      | 88         | 72         | 15       | 2.69     | (2.01, 3.60)      | 82        | 47         | 35       | 5.10     | (4.55, 5.71)      | 63        | 23         | 39       | 5.48     | (3.93, 7.63)      |
| British Columbia      | 85        | 53         | 32       | 5.18     | (4.05, 6.61)      | 86         | 68         | 18       | 2.89     | (2.36, 3.54)      | 82        | 45         | 37       | 5.64     | (5.15, 6.18)      | 47        | 14         | 33       | 5.52     | (4.33, 7.05)      |
| Ontario               | 72        | 38         | 34       | 4.15     | (3.58, 4.81)      | 74         | 58         | 17       | 2.11     | (1.88, 2.36)      | 76        | 42         | 35       | 4.50     | (4.27, 4.75)      | 48        | 15         | 33       | 5.33     | (4.61, 6.18)      |
| Saskatchewan-Manitoba | 77        | 55         | 22       | 2.75     | (1.86, 4.06)      | 84         | 69         | 16       | 2.45     | (1.84, 3.26)      | 82        | 46         | 36       | 5.43     | (4.76, 6.18)      | 45        | 12         | 33       | 6.00     | (4.12, 8.74)      |
| New South Wales       | 75        | 38         | 38       | 5.02     | (4.27, 5.90)      | 77         | 57         | 20       | 2.58     | (2.26, 2.94)      | 74        | 41         | 32       | 3.94     | (3.68, 4.23)      | 42        | 14         | 28       | 4.46     | (3.61, 5.50)      |
| Victoria              | 72        | 36         | 36       | 4.51     | (3.73, 5.46)      | 76         | 54         | 22       | 2.73     | (2.32, 3.22)      | 74        | 41         | 33       | 4.17     | (3.80, 4.59)      | 37        | 12         | 26       | 4.43     | (3.39, 5.79)      |
| New Zealand           | 76        | 41         | 35       | 4.52     | (3.54, 5.76)      | 83         | 69         | 14       | 2.21     | (1.81, 2.72)      | 77        | 45         | 32       | 4.13     | (3.76, 4.53)      | 42        | 17         | 25       | 3.52     | (2.75, 4.50)      |

EP: Emergency presentation; OR: Odds ratio; CI: Confidence Interval; LCI: Lower Confidence Interval; UCI: Upper Confidence Interval

## Supplementary Material 10. 12-month mortality by emergency presentation (defined as diagnosis of cancer within 30 days after an emergency hospital admission) status and other variables; odds ratios from crude and adjusted (with/without adjustment for stage) models

| Denmark                    |                    | All patients | 12-month mortality |       |                | Crude odds ratios |                |                |         | Adjusted odds ratios (stage unadjusted) |              |              |         | Adjusted odds ratios (stage adjusted) |              |              |         |  |
|----------------------------|--------------------|--------------|--------------------|-------|----------------|-------------------|----------------|----------------|---------|-----------------------------------------|--------------|--------------|---------|---------------------------------------|--------------|--------------|---------|--|
|                            |                    |              | Mort               | %Mort | 95% CI         | Crude OR          | Crude OR (LCI) | Crude OR (UCI) | p(COR)  | Adj OR                                  | Adj OR (LCI) | Adj OR (UCI) | p(AOR)  | Adj OR                                | Adj OR (LCI) | Adj OR (UCI) | p(AOR)  |  |
| <b>Total</b>               |                    | 46,003       | 17,610             | 38.3% | (37.8%, 38.7%) |                   |                |                |         |                                         |              |              |         |                                       |              |              |         |  |
| <b>Presentation status</b> | <b>Elective</b>    | 31,804       | 9,013              | 28.3% | (27.8%, 28.8%) | (ref)             | (ref)          | (ref)          | <0.0001 | (ref)                                   | (ref)        | (ref)        | <0.0001 | (ref)                                 | (ref)        | (ref)        | <0.0001 |  |
|                            | <b>Emergency</b>   | 14,199       | 8,597              | 60.5% | (59.7%, 61.3%) | 3.88              | 3.72           | 4.05           |         | 3.28                                    | 3.13         | 3.43         |         | 2.62                                  | 2.49         | 2.76         |         |  |
| <b>Sex</b>                 | <b>Male</b>        | 24,016       | 9,597              | 40.0% | (39.3%, 40.6%) | (ref)             | (ref)          | (ref)          | <0.0001 | (ref)                                   | (ref)        | (ref)        | <0.0001 | (ref)                                 | (ref)        | (ref)        | <0.0001 |  |
|                            | <b>Female</b>      | 21,987       | 8,013              | 36.4% | (35.8%, 37.1%) | 0.86              | 0.83           | 0.89           |         | 0.82                                    | 0.78         | 0.86         |         | 0.81                                  | 0.77         | 0.85         |         |  |
| <b>Diagnosis year</b>      | <b>2014</b>        | 11,354       | 4,581              | 40.3% | (39.4%, 41.3%) | (ref)             | (ref)          | (ref)          | <0.0001 | (ref)                                   | (ref)        | (ref)        | <0.0001 | (ref)                                 | (ref)        | (ref)        | <0.0001 |  |
|                            | <b>2015</b>        | 11,423       | 4,371              | 38.3% | (37.4%, 39.2%) | 0.92              | 0.87           | 0.97           |         | 0.95                                    | 0.89         | 1.01         |         | 0.95                                  | 0.89         | 1.01         |         |  |
|                            | <b>2016</b>        | 11,466       | 4,337              | 37.8% | (36.9%, 38.7%) | 0.90              | 0.85           | 0.95           |         | 0.90                                    | 0.85         | 0.96         |         | 0.92                                  | 0.86         | 0.98         |         |  |
|                            | <b>2017</b>        | 11,760       | 4,321              | 36.7% | (35.9%, 37.6%) | 0.86              | 0.81           | 0.91           |         | 0.87                                    | 0.82         | 0.93         |         | 0.87                                  | 0.81         | 0.93         |         |  |
| <b>Age group</b>           | <b>15-64</b>       | 13,131       | 3,817              | 29.1% | (28.3%, 29.9%) | 0.76              | 0.72           | 0.79           | <0.0001 | 0.75                                    | 0.71         | 0.79         | <0.0001 | 0.68                                  | 0.64         | 0.72         | <0.0001 |  |
|                            | <b>65-74</b>       | 17,336       | 10,303             | 35.4% | (34.9%, 36.0%) | (ref)             | (ref)          | (ref)          |         | (ref)                                   | (ref)        | (ref)        |         | (ref)                                 | (ref)        | (ref)        |         |  |
|                            | <b>75-84</b>       | 11,995       | 5,509              | 45.9% | (45.0%, 46.8%) | 1.57              | 1.49           | 1.64           |         | 1.67                                    | 1.58         | 1.77         |         | 1.89                                  | 1.78         | 2.01         |         |  |
|                            | <b>85+</b>         | 3,541        | 2,186              | 61.7% | (60.1%, 63.3%) | 2.97              | 2.76           | 3.20           |         | 4.17                                    | 3.82         | 4.55         |         | 4.81                                  | 4.37         | 5.29         |         |  |
| <b>Stage</b>               | <b>1</b>           | 5,977        | 434                | 7.3%  | (6.6%, 7.9%)   | (ref)             | (ref)          | (ref)          | <0.0001 |                                         |              |              |         | (ref)                                 | (ref)        | (ref)        | <0.0001 |  |
|                            | <b>2</b>           | 6,064        | 851                | 14.0% | (13.2%, 14.9%) | 2.09              | 1.86           | 2.36           |         |                                         |              |              |         | 2.01                                  | 1.76         | 2.28         |         |  |
|                            | <b>3</b>           | 7,231        | 1,948              | 26.9% | (25.9%, 28.0%) | 4.48              | 4.02           | 4.99           |         |                                         |              |              |         | 4.34                                  | 3.86         | 4.88         |         |  |
|                            | <b>4</b>           | 15,359       | 10,315             | 67.2% | (66.4%, 67.9%) | 24.82             | 22.45          | 27.50          |         |                                         |              |              |         | 21.63                                 | 19.41        | 24.15        |         |  |
|                            | <b>Unknown</b>     | 11,372       | 4,001              | 35.2% | (34.3%, 36.1%) | 6.59              | 5.95           | 7.31           |         |                                         |              |              |         | 7.78                                  | 6.95         | 8.73         |         |  |
| <b>Cancer site</b>         | <b>Oesophageal</b> | 1,896        | 1,019              | 53.7% | (51.5%, 56.0%) | 5.09              | 4.61           | 5.63           | <0.0001 | 7.07                                    | 6.35         | 7.88         | <0.0001 | 6.67                                  | 5.94         | 7.49         | <0.0001 |  |
|                            | <b>Stomach</b>     | 2,231        | 1,024              | 45.9% | (43.8%, 48.0%) | 3.72              | 3.38           | 4.09           |         | 4.38                                    | 3.96         | 4.85         |         | 4.20                                  | 3.76         | 4.69         |         |  |
|                            | <b>Colon</b>       | 12,928       | 2,401              | 18.6% | (17.9%, 19.3%) | (ref)             | (ref)          | (ref)          |         | (ref)                                   | (ref)        | (ref)        |         | (ref)                                 | (ref)        | (ref)        |         |  |
|                            | <b>Rectal</b>      | 6,005        | 790                | 13.2% | (12.3%, 14.0%) | 0.66              | 0.61           | 0.72           |         | 0.86                                    | 0.78         | 0.94         |         | 0.84                                  | 0.76         | 0.92         |         |  |
|                            | <b>Liver</b>       | 1,541        | 958                | 62.2% | (59.7%, 64.6%) | 7.20              | 6.44           | 8.06           |         | 8.29                                    | 7.35         | 9.35         |         | 10.69                                 | 9.36         | 12.22        |         |  |
|                            | <b>Pancreatic</b>  | 3,491        | 2,458              | 70.4% | (68.9%, 71.9%) | 10.43             | 9.58           | 11.36          |         | 11.79                                   | 10.76        | 12.92        |         | 10.03                                 | 9.09         | 11.09        |         |  |
|                            | <b>Lung</b>        | 16,003       | 8,547              | 53.4% | (52.6%, 54.2%) | 5.03              | 4.76           | 5.31           |         | 6.14                                    | 5.79         | 6.51         |         | 5.30                                  | 4.95         | 5.67         |         |  |
|                            | <b>Ovarian</b>     | 1,908        | 413                | 21.6% | (19.9%, 23.5%) | 1.21              | 1.08           | 1.36           |         | 1.79                                    | 1.57         | 2.03         |         | 1.28                                  | 1.12         | 1.47         |         |  |

| Norway                     |                    | All patients | 12-month mortality |       |                | Crude odds ratios |                |                |         | Adjusted odds ratios (stage unadjusted) |              |              |         | Adjusted odds ratios (stage adjusted) |              |              |         |
|----------------------------|--------------------|--------------|--------------------|-------|----------------|-------------------|----------------|----------------|---------|-----------------------------------------|--------------|--------------|---------|---------------------------------------|--------------|--------------|---------|
|                            |                    |              | Mort               | %Mort | 95% CI         | Crude OR          | Crude OR (LCI) | Crude OR (UCI) | p(COR)  | Adj OR                                  | Adj OR (LCI) | Adj OR (UCI) | p(AOR)  | Adj OR                                | Adj OR (LCI) | Adj OR (UCI) | p(AOR)  |
| <b>Total</b>               |                    | 46,147       | 17,329             | 37.6% | (37.1%, 38%)   |                   |                |                |         |                                         |              |              |         |                                       |              |              |         |
| <b>Presentation status</b> | <b>Elective</b>    | 29,281       | 7,222              | 24.7% | (24.2%, 25.2%) | (ref)             | (ref)          | (ref)          | <0.0001 | (ref)                                   | (ref)        | (ref)        | <0.0001 | (ref)                                 | (ref)        | (ref)        | <0.0001 |
|                            | <b>Emergency</b>   | 16,866       | 10,107             | 59.9% | (59.2%, 60.7%) | 4.57              | 4.39           | 4.76           |         | 4.37                                    | 4.17         | 4.58         |         | 3.31                                  | 3.15         | 3.49         |         |
| <b>Sex</b>                 | <b>Male</b>        | 23,319       | 9,423              | 40.4% | (39.8%, 41%)   | (ref)             | (ref)          | (ref)          | <0.0001 | (ref)                                   | (ref)        | (ref)        | <0.0001 | (ref)                                 | (ref)        | (ref)        | <0.0001 |
|                            | <b>Female</b>      | 22,828       | 7,906              | 34.6% | (34%, 35.3%)   | 0.78              | 0.75           | 0.81           |         | 0.78                                    | 0.75         | 0.82         |         | 0.77                                  | 0.73         | 0.81         |         |
| <b>Diagnosis year</b>      | <b>2012</b>        | 8,962        | 3,688              | 41.2% | (40.1%, 42.2%) | (ref)             | (ref)          | (ref)          | <0.0001 | (ref)                                   | (ref)        | (ref)        | <0.0001 | (ref)                                 | (ref)        | (ref)        | <0.0001 |
|                            | <b>2013</b>        | 9,060        | 3,431              | 37.9% | (36.9%, 38.9%) | 0.87              | 0.82           | 0.93           |         | 0.89                                    | 0.82         | 0.95         |         | 0.86                                  | 0.79         | 0.93         |         |
|                            | <b>2014</b>        | 9,293        | 3,502              | 37.7% | (36.7%, 38.7%) | 0.86              | 0.81           | 0.92           |         | 0.87                                    | 0.81         | 0.94         |         | 0.84                                  | 0.78         | 0.91         |         |
|                            | <b>2015</b>        | 9,561        | 3,508              | 36.7% | (35.7%, 37.7%) | 0.83              | 0.78           | 0.88           |         | 0.82                                    | 0.76         | 0.88         |         | 0.78                                  | 0.72         | 0.84         |         |
|                            | <b>2016</b>        | 9,271        | 3,200              | 34.5% | (33.6%, 35.5%) | 0.75              | 0.71           | 0.80           |         | 0.78                                    | 0.72         | 0.83         |         | 0.72                                  | 0.67         | 0.78         |         |
| <b>Age group</b>           | <b>15-64</b>       | 13,277       | 3,511              | 26.4% | (25.7%, 27.2%) | 0.66              | 0.63           | 0.69           | <0.0001 | 0.68                                    | 0.64         | 0.72         | <0.0001 | 0.60                                  | 0.56         | 0.64         | <0.0001 |
|                            | <b>65-74</b>       | 15,278       | 5,394              | 35.3% | (34.6%, 36.1%) | (ref)             | (ref)          | (ref)          |         | (ref)                                   | (ref)        | (ref)        |         | (ref)                                 | (ref)        | (ref)        |         |
|                            | <b>75-84</b>       | 12,424       | 5,461              | 44.0% | (43.1%, 44.8%) | 1.44              | 1.37           | 1.51           |         | 1.71                                    | 1.61         | 1.81         |         | 1.97                                  | 1.85         | 2.10         |         |
|                            | <b>85+</b>         | 5,168        | 2,963              | 57.3% | (56.0%, 58.7%) | 2.46              | 2.31           | 2.63           |         | 3.28                                    | 3.04         | 3.54         |         | 3.91                                  | 3.59         | 4.26         |         |
| <b>Stage</b>               | <b>Local</b>       | 8,515        | 957                | 11.2% | (10.6%, 11.9%) | (ref)             | (ref)          | (ref)          | <0.0001 |                                         |              |              |         | (ref)                                 | (ref)        | (ref)        | <0.0001 |
|                            | <b>Regional</b>    | 16,460       | 3,285              | 20.0% | (19.4%, 20.6%) | 1.97              | 1.82           | 2.13           |         |                                         |              |              |         | 2.23                                  | 2.04         | 2.43         |         |
|                            | <b>Distant</b>     | 15,613       | 9,826              | 62.9% | (62.2%, 63.7%) | 13.41             | 12.45          | 14.46          |         |                                         |              |              |         | 15.16                                 | 13.9         | 16.54        |         |
|                            | <b>Unknown</b>     | 5,559        | 3,261              | 58.7% | (57.4%, 59.9%) | 11.21             | 10.29          | 12.22          |         |                                         |              |              |         | 7.81                                  | 7.09         | 8.61         |         |
| <b>Cancer site</b>         | <b>Oesophageal</b> | 1,332        | 705                | 52.9% | (50.2%, 55.6%) | 4.27              | 3.81           | 4.79           | <0.0001 | 6.29                                    | 5.55         | 7.14         | <0.0001 | 5.47                                  | 4.76         | 6.28         | <0.0001 |
|                            | <b>Stomach</b>     | 2,357        | 1,094              | 46.4% | (44.4%, 48.4%) | 3.29              | 3.00           | 3.60           |         | 3.92                                    | 3.54         | 4.33         |         | 3.29                                  | 2.95         | 3.67         |         |
|                            | <b>Colon</b>       | 14,941       | 3,116              | 20.9% | (20.2%, 21.5%) | (ref)             | (ref)          | (ref)          |         | (ref)                                   | (ref)        | (ref)        |         | (ref)                                 | (ref)        | (ref)        |         |
|                            | <b>Rectal</b>      | 5,612        | 752                | 13.4% | (12.5%, 14.3%) | 0.59              | 0.54           | 0.64           |         | 0.88                                    | 0.80         | 0.97         |         | 0.89                                  | 0.81         | 0.98         |         |
|                            | <b>Liver</b>       | 1,181        | 704                | 59.6% | (56.8%, 62.4%) | 5.60              | 4.96           | 6.34           |         | 6.87                                    | 6.00         | 7.86         |         | 8.03                                  | 6.89         | 9.38         |         |
|                            | <b>Pancreatic</b>  | 3,715        | 2,668              | 71.8% | (70.3%, 73.2%) | 9.67              | 8.91           | 10.50          |         | 11.39                                   | 10.41        | 12.46        |         | 8.4                                   | 7.62         | 9.27         |         |
|                            | <b>Lung</b>        | 14,402       | 7,765              | 53.9% | (53.1%, 54.7%) | 4.44              | 4.22           | 4.67           |         | 6.18                                    | 5.83         | 6.55         |         | 5.38                                  | 5.05         | 5.74         |         |
|                            | <b>Ovarian</b>     | 2,607        | 525                | 20.1% | (18.6%, 21.7%) | 0.96              | 0.86           | 1.06           |         | 1.39                                    | 1.24         | 1.56         |         | 0.56                                  | 0.49         | 0.63         |         |

| England                    | All patients      | 12-month mortality |         |        | Crude odds ratios |                |                |        | Adjusted odds ratios (stage unadjusted) |              |              |        | Adjusted odds ratios (stage adjusted) |              |              |        |         |
|----------------------------|-------------------|--------------------|---------|--------|-------------------|----------------|----------------|--------|-----------------------------------------|--------------|--------------|--------|---------------------------------------|--------------|--------------|--------|---------|
|                            |                   | Mort               | %Mort   | 95% CI | Crude OR          | Crude OR (LCI) | Crude OR (UCI) | p(COR) | Adj OR                                  | Adj OR (LCI) | Adj OR (UCI) | p(AOR) | Adj OR                                | Adj OR (LCI) | Adj OR (UCI) | p(AOR) |         |
|                            | <b>Total</b>      | 373,194            | 187,698 | 50.3%  | (50.1%, 50.5%)    |                |                |        |                                         |              |              |        |                                       |              |              |        |         |
| <b>Presentation status</b> | <b>Elective</b>   | 256,260            | 99,437  | 38.8%  | (36.9%, 37.3%)    | (ref)          | (ref)          | (ref)  | <0.0001                                 | (ref)        | (ref)        | (ref)  | <0.0001                               | (ref)        | (ref)        | (ref)  | <0.0001 |
|                            | <b>Emergency</b>  | 116,934            | 88,261  | 75.5%  | (72.5%, 73.0%)    | 4.85           | 4.78           | 4.93   |                                         | 4.54         | 4.46         | 4.62   |                                       | 3.46         | 3.39         | 3.53   |         |
| <b>Sex</b>                 | <b>Male</b>       | 197,003            | 101,355 | 51.4%  | (51.2%, 51.7%)    | (ref)          | (ref)          | (ref)  | <0.0001                                 | (ref)        | (ref)        | (ref)  | <0.0001                               | (ref)        | (ref)        | (ref)  | <0.0001 |
|                            | <b>Female</b>     | 176,191            | 86,343  | 49.0%  | (48.8%, 49.2%)    | 0.91           | 0.90           | 0.92   |                                         | 0.86         | 0.85         | 0.87   |                                       | 0.88         | 0.86         | 0.89   |         |
| <b>Diagnosis year</b>      | <b>2013</b>       | 90,993             | 45,991  | 50.5%  | (50.2%, 50.9%)    | (ref)          | (ref)          | (ref)  | 0.0098                                  | (ref)        | (ref)        | (ref)  | <0.0001                               | (ref)        | (ref)        | (ref)  | 0.0010  |
|                            | <b>2014</b>       | 92,609             | 46,859  | 50.6%  | (50.3%, 50.9%)    | 1.00           | 0.98           | 1.02   |                                         | 1.00         | 0.98         | 1.02   |                                       | 1.04         | 1.02         | 1.07   |         |
|                            | <b>2015</b>       | 94,296             | 47,232  | 50.1%  | (49.8%, 50.4%)    | 0.98           | 0.96           | 1.00   |                                         | 0.98         | 0.96         | 1.00   |                                       | 1.04         | 1.02         | 1.07   |         |
|                            | <b>2016</b>       | 95,296             | 47,616  | 50.0%  | (49.6%, 50.3%)    | 0.98           | 0.96           | 1.00   |                                         | 0.98         | 0.96         | 1.00   |                                       | 1.05         | 1.03         | 1.08   |         |
| <b>Age group</b>           | <b>15-64</b>      | 98,419             | 35,732  | 36.3%  | (36%, 36.6%)      | 0.66           | 0.65           | 0.67   | <0.0001                                 | 0.70         | 0.68         | 0.71   | <0.0001                               | 0.62         | 0.60         | 0.63   | <0.0001 |
|                            | <b>65-74</b>      | 112,970            | 52,332  | 46.3%  | (46.0%, 46.6%)    | (ref)          | (ref)          | (ref)  |                                         | (ref)        | (ref)        | (ref)  |                                       | (ref)        | (ref)        | (ref)  |         |
|                            | <b>75-84</b>      | 110,521            | 62,784  | 56.8%  | (56.5%, 57.1%)    | 1.52           | 1.50           | 1.55   |                                         | 1.54         | 1.51         | 1.57   |                                       | 1.79         | 1.75         | 1.83   |         |
|                            | <b>85+</b>        | 51,284             | 36,850  | 71.9%  | (71.5%, 72.2%)    | 2.96           | 2.89           | 3.03   |                                         | 3.02         | 2.94         | 3.09   |                                       | 3.63         | 3.53         | 3.74   |         |
| <b>Stage</b>               | <b>1</b>          | 48,445             | 6,141   | 12.7%  | (12.4%, 13.0%)    | (ref)          | (ref)          | (ref)  | <0.0001                                 |              |              |        |                                       | (ref)        | (ref)        | (ref)  | <0.0001 |
|                            | <b>2</b>          | 49,375             | 10,182  | 20.6%  | (20.3%, 21.0%)    | 1.79           | 1.73           | 1.85   |                                         |              |              |        |                                       | 2.16         | 2.08         | 2.25   |         |
|                            | <b>3</b>          | 80,853             | 28,657  | 35.4%  | (35.1%, 35.8%)    | 3.78           | 3.67           | 3.90   |                                         |              |              |        |                                       | 4.93         | 4.76         | 5.10   |         |
|                            | <b>4</b>          | 136,382            | 105,420 | 77.3%  | (77.1%, 77.5%)    | 23.46          | 22.77          | 24.16  |                                         |              |              |        |                                       | 23.33        | 22.57        | 24.12  |         |
|                            | <b>Unknown</b>    | 58,139             | 37,298  | 64.2%  | (63.8%, 64.5%)    | 12.33          | 11.94          | 12.73  |                                         |              |              |        |                                       | 9.47         | 9.13         | 9.82   |         |
|                            |                   | <b>Oesophageal</b> | 27,274  | 15,358 | 56.3%             | (55.7%, 56.9%) | 3.09           | 3.00   | 3.18                                    | <0.0001      | 4.48         | 4.34   | 4.62                                  | <0.0001      | 4.37         | 4.22   | 4.52    |
| <b>Cancer site</b>         | <b>Stomach</b>    | 19,813             | 11,405  | 57.6%  | (56.9%, 58.2%)    | 3.25           | 3.15           | 3.36   |                                         | 3.71         | 3.58         | 3.84   |                                       | 3.14         | 3.02         | 3.26   |         |
|                            | <b>Colon</b>      | 88,219             | 25,975  | 29.4%  | (29.1%, 29.7%)    | (ref)          | (ref)          | (ref)  |                                         | (ref)        | (ref)        | (ref)  |                                       | (ref)        | (ref)        | (ref)  |         |
|                            | <b>Rectal</b>     | 33,905             | 6,241   | 18.4%  | (18.0%, 18.8%)    | 0.54           | 0.52           | 0.56   |                                         | 0.78         | 0.75         | 0.80   |                                       | 0.82         | 0.79         | 0.85   |         |
|                            | <b>Liver</b>      | 17,699             | 11,641  | 65.8%  | (65.1%, 66.5%)    | 4.60           | 4.45           | 4.77   |                                         | 5.07         | 4.88         | 5.26   |                                       | 3.90         | 3.74         | 4.06   |         |
|                            | <b>Pancreatic</b> | 30,442             | 23,782  | 78.1%  | (77.7%, 78.6%)    | 8.56           | 8.30           | 8.82   |                                         | 9.51         | 9.20         | 9.83   |                                       | 7.24         | 6.98         | 7.51   |         |
|                            | <b>Lung</b>       | 135,396            | 86,848  | 64.1%  | (63.9%, 64.4%)    | 4.29           | 4.21           | 4.37   |                                         | 5.20         | 5.10         | 5.31   |                                       | 4.57         | 4.46         | 4.67   |         |
|                            | <b>Ovarian</b>    | 20,446             | 6,448   | 31.5%  | (30.9%, 32.2%)    | 1.10           | 1.07           | 1.14   |                                         | 1.29         | 1.24         | 1.34   |                                       | 1.23         | 1.18         | 1.28   |         |



| Northern Ireland           |                    | All patients | 12-month mortality |                |                | Crude odds ratios |                |                |         | Adjusted odds ratios (stage unadjusted) |              |              |         | Adjusted odds ratios (stage adjusted) |              |              |         |
|----------------------------|--------------------|--------------|--------------------|----------------|----------------|-------------------|----------------|----------------|---------|-----------------------------------------|--------------|--------------|---------|---------------------------------------|--------------|--------------|---------|
|                            |                    |              | Mort               | %Mort          | 95% CI         | Crude OR          | Crude OR (LCI) | Crude OR (UCI) | p(COR)  | Adj OR                                  | Adj OR (LCI) | Adj OR (UCI) | p(AOR)  | Adj OR                                | Adj OR (LCI) | Adj OR (UCI) | p(AOR)  |
|                            | <b>Total</b>       | 15,501       | 7,708              | 49.7%          | (48.9%, 50.5%) |                   |                |                |         |                                         |              |              |         |                                       |              |              |         |
| <b>Presentation status</b> | <b>Elective</b>    | 11,179       | 4,328              | 38.7%          | (37.8%, 39.6%) | (ref)             | (ref)          | (ref)          | <0.0001 | (ref)                                   | (ref)        | (ref)        | <0.0001 | (ref)                                 | (ref)        | (ref)        | <0.0001 |
|                            | <b>Emergency</b>   | 4,322        | 3,380              | 78.2%          | (76.9%, 79.4%) | 5.68              | 5.24           | 6.17           |         | 5.46                                    | 4.98         | 5.99         |         | 3.53                                  | 3.19         | 3.92         |         |
| <b>Sex</b>                 | <b>Male</b>        | 8,134        | 4,028              | 49.5%          | (48.4%, 50.6%) | (ref)             | (ref)          | (ref)          | 0.59    | (ref)                                   | (ref)        | (ref)        | 0.19    | (ref)                                 | (ref)        | (ref)        | 0.97    |
|                            | <b>Female</b>      | 7,367        | 3,680              | 50.0%          | (48.8%, 51.1%) | 1.02              | 0.96           | 1.08           |         | 0.95                                    | 0.88         | 1.03         |         | 1.00                                  | 0.92         | 1.10         |         |
| <b>Diagnosis year</b>      | <b>2012</b>        | 3,071        | 1,547              | 50.4%          | (48.6%, 52.1%) | 1.04              | 0.94           | 1.15           | 0.83    | 1.03                                    | 0.91         | 1.16         | 0.052   | 0.95                                  | 0.83         | 1.09         | 0.73    |
|                            | <b>2013</b>        | 3,125        | 1,544              | 49.4%          | (47.7%, 51.2%) | (ref)             | (ref)          | (ref)          |         | (ref)                                   | (ref)        | (ref)        |         | (ref)                                 | (ref)        | (ref)        |         |
|                            | <b>2014</b>        | 3,051        | 1,494              | 49.0%          | (47.2%, 50.7%) | 0.98              | 0.89           | 1.09           |         | 0.92                                    | 0.82         | 1.04         |         | 0.94                                  | 0.82         | 1.07         |         |
|                            | <b>2015</b>        | 3,072        | 1,533              | 49.9%          | (48.1%, 51.7%) | 1.02              | 0.92           | 1.13           |         | 0.94                                    | 0.83         | 1.05         |         | 0.93                                  | 0.81         | 1.07         |         |
|                            | <b>2016</b>        | 3,182        | 1,590              | 50.0%          | (48.2%, 51.7%) | 1.02              | 0.93           | 1.13           |         | 0.94                                    | 0.84         | 1.06         |         | 1.01                                  | 0.88         | 1.15         |         |
| <b>Age group</b>           | <b>15-64</b>       | 4,432        | 1,640              | 37.0%          | (35.6%, 38.4%) | 0.67              | 0.62           | 0.73           | <0.0001 | 0.72                                    | 0.65         | 0.79         | <0.0001 | 0.62                                  | 0.55         | 0.69         | <0.0001 |
|                            | <b>65-74</b>       | 4,965        | 2,319              | 46.7%          | (45.3%, 48.1%) | (ref)             | (ref)          | (ref)          |         | (ref)                                   | (ref)        | (ref)        |         | (ref)                                 | (ref)        | (ref)        |         |
|                            | <b>75-84</b>       | 4,408        | 2,549              | 57.8%          | (56.4%, 59.3%) | 1.56              | 1.44           | 1.70           |         | 1.70                                    | 1.54         | 1.87         |         | 1.97                                  | 1.76         | 2.20         |         |
|                            | <b>85+</b>         | 1,696        | 1,200              | 70.8%          | (68.5%, 72.9%) | 2.76              | 2.45           | 3.11           |         | 3.19                                    | 2.77         | 3.67         |         | 3.57                                  | 3.05         | 4.19         |         |
| <b>Stage</b>               | <b>1</b>           | 2,221        | 290                | 13.1%          | (11.7%, 14.5%) | (ref)             | (ref)          | (ref)          | <0.0001 |                                         |              |              |         | (ref)                                 | (ref)        | (ref)        | <0.0001 |
|                            | <b>2</b>           | 2,234        | 351                | 15.7%          | (14.3%, 17.3%) | 1.24              | 1.05           | 1.47           |         |                                         |              |              |         | 1.72                                  | 1.43         | 2.08         |         |
|                            | <b>3</b>           | 3,584        | 1,330              | 37.1%          | (35.5%, 38.7%) | 3.93              | 3.42           | 4.53           |         |                                         |              |              |         | 4.87                                  | 4.16         | 5.71         |         |
|                            | <b>4</b>           | 5,184        | 4,132              | 79.7%          | (78.6%, 80.8%) | 26.15             | 22.75          | 30.15          |         |                                         |              |              |         | 26.71                                 | 22.75        | 31.44        |         |
|                            | <b>Unknown</b>     | 2,278        | 1,605              | 70.5%          | (68.5%, 72.3%) | 15.88             | 13.65          | 18.53          |         |                                         |              |              |         | 10.81                                 | 9.07         | 12.92        |         |
| <b>Cancer site</b>         | <b>Oesophageal</b> | 972          | 521                | 53.6%          | (50.5%, 56.7%) | 3.47              | 3.00           | 4.01           | <0.0001 | 5.04                                    | 4.29         | 5.91         | <0.0001 | 3.90                                  | 3.26         | 4.68         | <0.0001 |
|                            | <b>Stomach</b>     | 990          | 583                | 58.9%          | (55.8%, 61.9%) | 4.30              | 3.72           | 4.98           |         | 4.91                                    | 4.19         | 5.77         |         | 3.23                                  | 2.70         | 3.87         |         |
|                            | <b>Colon</b>       | 3,846        | 961                | 25.0%          | (23.6%, 26.4%) | (ref)             | (ref)          | (ref)          |         | (ref)                                   | (ref)        | (ref)        |         | (ref)                                 | (ref)        | (ref)        |         |
|                            | <b>Rectal</b>      | 1,376        | 225                | 16.4%          | (14.5%, 18.4%) | 0.59              | 0.50           | 0.69           |         | 0.84                                    | 0.71         | 1.00         |         | 0.91                                  | 0.75         | 1.10         |         |
|                            | <b>Liver</b>       | 582          | 383                | 65.8%          | (61.9%, 69.5%) | 5.78              | 4.80           | 6.97           |         | 6.46                                    | 5.27         | 7.93         |         | 6.18                                  | 4.90         | 7.83         |         |
|                            | <b>Pancreatic</b>  | 1,162        | 914                | 78.7%          | (76.2%, 80.9%) | 11.06             | 9.46           | 12.98          |         | 12.49                                   | 10.54        | 14.85        |         | 9.80                                  | 8.08         | 11.91        |         |
|                            | <b>Lung</b>        | 5,752        | 3,831              | 66.6%          | (65.4%, 67.8%) | 5.99              | 5.47           | 6.56           |         | 7.48                                    | 6.76         | 8.29         |         | 7.17                                  | 6.38         | 8.07         |         |
| <b>Ovarian</b>             | 821                | 290          | 35.3%              | (32.1%, 38.7%) | 1.64           | 1.40              | 1.92           |                | 1.85    | 1.54                                    | 2.23         |              | 2.16    | 1.76                                  | 2.65         |              |         |

| Scotland                   |                    | All patients | 12-month mortality |       |                | Crude odds ratios |                |                |         | Adjusted odds ratios (stage unadjusted) |              |              |         | Adjusted odds ratios (stage adjusted) |              |              |         |
|----------------------------|--------------------|--------------|--------------------|-------|----------------|-------------------|----------------|----------------|---------|-----------------------------------------|--------------|--------------|---------|---------------------------------------|--------------|--------------|---------|
|                            |                    |              | Mort               | %Mort | 95% CI         | Crude OR          | Crude OR (LCI) | Crude OR (UCI) | p(COR)  | Adj OR                                  | Adj OR (LCI) | Adj OR (UCI) | p(AOR)  | Adj OR                                | Adj OR (LCI) | Adj OR (UCI) | p(AOR)  |
|                            | <b>Total</b>       | 45,029       | 23,417             | 52.0% | (51.5%, 52.5%) |                   |                |                |         |                                         |              |              |         |                                       |              |              |         |
| <b>Presentation status</b> | <b>Elective</b>    | 27,708       | 10,910             | 39.4% | (38.8%, 40.0%) | (ref)             | (ref)          | (ref)          | <0.0001 | (ref)                                   | (ref)        | (ref)        | <0.0001 | (ref)                                 | (ref)        | (ref)        | <0.0001 |
|                            | <b>Emergency</b>   | 17,321       | 12,507             | 72.2% | (71.5%, 72.9%) | 4.00              | 3.84           | 4.17           |         | 3.60                                    | 3.44         | 3.77         |         | 2.95                                  | 2.80         | 3.11         |         |
| <b>Sex</b>                 | <b>Male</b>        | 23,042       | 12,279             | 53.3% | (52.6%, 53.9%) | 1.11              | 1.07           | 1.15           | <0.0001 | 1.19                                    | 1.14         | 1.25         | <0.0001 | 1.17                                  | 1.11         | 1.23         | <0.0001 |
|                            | <b>Female</b>      | 21,987       | 11,138             | 50.7% | (50.0%, 51.3%) | (ref)             | (ref)          | (ref)          |         | (ref)                                   | (ref)        | (ref)        |         | (ref)                                 | (ref)        | (ref)        |         |
| <b>Diagnosis year</b>      | <b>2014</b>        | 11,599       | 6,077              | 52.4% | (51.5%, 53.3%) | (ref)             | (ref)          | (ref)          | 0.36    | (ref)                                   | (ref)        | (ref)        | 0.43    | (ref)                                 | (ref)        | (ref)        | 0.27    |
|                            | <b>2015</b>        | 11,091       | 5,708              | 51.5% | (50.5%, 52.4%) | 0.96              | 0.91           | 1.02           |         | 0.95                                    | 0.9          | 1.01         |         | 0.94                                  | 0.88         | 1.01         |         |
|                            | <b>2016</b>        | 11,064       | 5,721              | 51.7% | (50.8%, 52.6%) | 0.97              | 0.92           | 1.03           |         | 0.99                                    | 0.93         | 1.05         |         | 0.98                                  | 0.92         | 1.05         |         |
|                            | <b>2017</b>        | 11,275       | 5,911              | 52.4% | (51.5%, 53.3%) | 1.00              | 0.95           | 1.05           |         | 1.02                                    | 0.96         | 1.08         |         | 1.02                                  | 0.96         | 1.10         |         |
| <b>Age group</b>           | <b>15-64</b>       | 12,024       | 4,686              | 39.0% | (38.1%, 39.8%) | 0.66              | 0.63           | 0.70           | <0.0001 | 0.70                                    | 0.67         | 0.74         | <0.0001 | 0.61                                  | 0.57         | 0.65         | <0.0001 |
|                            | <b>65-74</b>       | 14,233       | 6,986              | 49.1% | (48.3%, 49.9%) | (ref)             | (ref)          | (ref)          |         | (ref)                                   | (ref)        | (ref)        |         | (ref)                                 | (ref)        | (ref)        |         |
|                            | <b>75-84</b>       | 13,399       | 7,830              | 58.4% | (57.6%, 59.3%) | 1.46              | 1.39           | 1.53           |         | 1.47                                    | 1.40         | 1.55         |         | 1.72                                  | 1.62         | 1.83         |         |
|                            | <b>85+</b>         | 5,373        | 3,915              | 72.9% | (71.7%, 74.0%) | 2.79              | 2.60           | 2.98           |         | 2.88                                    | 2.66         | 3.11         |         | 3.46                                  | 3.17         | 3.77         |         |
| <b>Stage</b>               | <b>1</b>           | 5,858        | 740                | 12.6% | (11.8%, 13.5%) | (ref)             | (ref)          | (ref)          | <0.0001 |                                         |              |              |         | (ref)                                 | (ref)        | (ref)        | <0.0001 |
|                            | <b>2</b>           | 5,857        | 1,113              | 19.0% | (18.0%, 20.0%) | 1.62              | 1.47           | 1.80           |         |                                         |              |              |         | 2.23                                  | 2.00         | 2.50         |         |
|                            | <b>3</b>           | 9,180        | 3,542              | 38.6% | (37.6%, 39.6%) | 4.35              | 3.98           | 4.75           |         |                                         |              |              |         | 5.85                                  | 5.31         | 6.45         |         |
|                            | <b>4</b>           | 17,250       | 13,918             | 80.7% | (80.1%, 81.3%) | 28.89             | 26.53          | 31.5           |         |                                         |              |              |         | 31.94                                 | 29.06        | 35.15        |         |
|                            | <b>Unknown</b>     | 6,884        | 4,104              | 59.6% | (58.5%, 60.8%) | 10.21             | 9.33           | 11.19          |         |                                         |              |              |         | 9.09                                  | 8.21         | 10.08        |         |
| <b>Cancer site</b>         | <b>Oesophageal</b> | 3,378        | 1,985              | 58.8% | (57.1%, 60.4%) | 3.22              | 2.97           | 3.49           | <0.0001 | 4.37                                    | 4.01         | 4.77         | <0.0001 | 3.97                                  | 3.60         | 4.38         | <0.0001 |
|                            | <b>Stomach</b>     | 2,337        | 1,398              | 59.8% | (57.8%, 61.8%) | 3.36              | 3.06           | 3.69           |         | 3.70                                    | 3.34         | 4.09         |         | 2.77                                  | 2.48         | 3.10         |         |
|                            | <b>Colon</b>       | 9,600        | 2,948              | 30.7% | (29.8%, 31.6%) | (ref)             | (ref)          | (ref)          |         | (ref)                                   | (ref)        | (ref)        |         | (ref)                                 | (ref)        | (ref)        |         |
|                            | <b>Rectal</b>      | 3,535        | 648                | 18.3% | (17.1%, 19.6%) | 0.51              | 0.46           | 0.56           |         | 0.71                                    | 0.64         | 0.79         |         | 0.75                                  | 0.67         | 0.84         |         |
|                            | <b>Liver</b>       | 2,340        | 1,432              | 61.2% | (59.2%, 63.2%) | 3.56              | 3.24           | 3.91           |         | 3.73                                    | 3.37         | 4.12         |         | 3.81                                  | 3.39         | 4.28         |         |
|                            | <b>Pancreatic</b>  | 3,054        | 2,373              | 77.7% | (76.2%, 79.1%) | 7.86              | 7.15           | 8.66           |         | 7.67                                    | 6.93         | 8.50         |         | 6.22                                  | 5.55         | 6.98         |         |
|                            | <b>Lung</b>        | 18,662       | 11,924             | 63.9% | (63.2%, 64.6%) | 3.99              | 3.79           | 4.21           |         | 4.55                                    | 4.29         | 4.81         |         | 4.04                                  | 3.78         | 4.32         |         |
|                            | <b>Ovarian</b>     | 2,123        | 709                | 33.4% | (31.4%, 35.4%) | 1.13              | 1.02           | 1.25           |         | 1.26                                    | 1.13         | 1.40         |         | 1.19                                  | 1.05         | 1.35         |         |

| Wales                      | All patients       | 12-month mortality |        |                | Crude odds ratios |                |                |        | Adjusted odds ratios (stage unadjusted) |              |              |        | Adjusted odds ratios (stage adjusted) |              |              |        |         |
|----------------------------|--------------------|--------------------|--------|----------------|-------------------|----------------|----------------|--------|-----------------------------------------|--------------|--------------|--------|---------------------------------------|--------------|--------------|--------|---------|
|                            |                    | Mort               | %Mort  | 95% CI         | Crude OR          | Crude OR (LCI) | Crude OR (UCI) | p(COR) | Adj OR                                  | Adj OR (LCI) | Adj OR (UCI) | p(AOR) | Adj OR                                | Adj OR (LCI) | Adj OR (UCI) | p(AOR) |         |
|                            | <b>Total</b>       | 26,139             | 13,270 | 50.8%          | (50.2%, 51.4%)    |                |                |        |                                         |              |              |        |                                       |              |              |        |         |
| <b>Presentation status</b> | <b>Elective</b>    | 16,376             | 6,253  | 38.2%          | (37.4%, 38.9%)    | (ref)          | (ref)          | (ref)  | <0.0001                                 | (ref)        | (ref)        | (ref)  | <0.0001                               | (ref)        | (ref)        | (ref)  | <0.0001 |
|                            | <b>Emergency</b>   | 9,763              | 7,017  | 71.9%          | (71.0%, 72.8%)    | 4.14           | 3.92           | 4.37   |                                         | 3.79         | 3.57         | 4.03   |                                       | 2.99         | 2.79         | 3.19   |         |
| <b>Sex</b>                 | <b>Male</b>        | 14,017             | 7,338  | 52.4%          | (51.5%, 53.2%)    | (ref)          | (ref)          | (ref)  | <0.0001                                 | (ref)        | (ref)        | (ref)  | <0.0001                               | (ref)        | (ref)        | (ref)  | 0.0034  |
|                            | <b>Female</b>      | 12,122             | 5,932  | 48.9%          | (48.0%, 49.8%)    | 0.87           | 0.83           | 0.92   |                                         | 0.87         | 0.82         | 0.92   |                                       | 0.91         | 0.85         | 0.97   |         |
| <b>Diagnosis year</b>      | <b>2013</b>        | 6,537              | 3,409  | 52.1%          | (50.9%, 53.4%)    | (ref)          | (ref)          | (ref)  | 0.060                                   | (ref)        | (ref)        | (ref)  | 0.013                                 | (ref)        | (ref)        | (ref)  | 0.11    |
|                            | <b>2014</b>        | 6,586              | 3,328  | 50.5%          | (49.3%, 51.7%)    | 0.94           | 0.88           | 1.00   |                                         | 0.94         | 0.87         | 1.01   |                                       | 0.91         | 0.83         | 0.99   |         |
|                            | <b>2015</b>        | 6,545              | 3,306  | 50.5%          | (49.3%, 51.7%)    | 0.94           | 0.87           | 1.00   |                                         | 0.91         | 0.84         | 0.98   |                                       | 0.92         | 0.84         | 1.01   |         |
|                            | <b>2016</b>        | 6,471              | 3,227  | 49.9%          | (48.7%, 51.1%)    | 0.91           | 0.85           | 0.98   |                                         | 0.90         | 0.83         | 0.97   |                                       | 0.92         | 0.84         | 1.00   |         |
| <b>Age group</b>           | <b>15-64</b>       | 6,645              | 2,507  | 37.7%          | (36.6%, 38.9%)    | 0.69           | 0.64           | 0.73   | <0.0001                                 | 0.73         | 0.68         | 0.79   | <0.0001                               | 0.63         | 0.58         | 0.68   | <0.0001 |
|                            | <b>65-74</b>       | 8,453              | 3,959  | 46.8%          | (45.8%, 47.9%)    | (ref)          | (ref)          | (ref)  |                                         | (ref)        | (ref)        | (ref)  |                                       | (ref)        | (ref)        | (ref)  |         |
|                            | <b>75-84</b>       | 7,758              | 4,451  | 57.4%          | (56.3%, 58.5%)    | 1.53           | 1.44           | 1.63   |                                         | 1.60         | 1.49         | 1.72   |                                       | 1.83         | 1.69         | 1.98   |         |
|                            | <b>85+</b>         | 3,283              | 2,353  | 71.7%          | (70.1%, 73.2%)    | 2.87           | 2.63           | 3.13   |                                         | 3.06         | 2.77         | 3.38   |                                       | 3.92         | 3.51         | 4.37   |         |
| <b>Stage</b>               | <b>1</b>           | 3,310              | 424    | 12.8%          | (11.7%, 14%)      | (ref)          | (ref)          | (ref)  | <0.0001                                 |              |              |        |                                       | (ref)        | (ref)        | (ref)  | <0.0001 |
|                            | <b>2</b>           | 3,451              | 866    | 25.1%          | (23.7%, 26.6%)    | 2.28           | 2.01           | 2.59   |                                         |              |              |        |                                       | 2.57         | 2.23         | 2.97   |         |
|                            | <b>3</b>           | 6,038              | 2,232  | 37.0%          | (35.8%, 38.2%)    | 3.99           | 3.56           | 4.48   |                                         |              |              |        |                                       | 4.96         | 4.37         | 5.64   |         |
|                            | <b>4</b>           | 9,006              | 7,131  | 79.2%          | (78.3%, 80.0%)    | 25.89          | 23.12          | 29.04  |                                         |              |              |        |                                       | 25.57        | 22.52        | 29.08  |         |
|                            | <b>Unknown</b>     | 4,334              | 2,617  | 60.4%          | (58.9%, 61.8%)    | 10.37          | 9.22           | 11.69  |                                         |              |              |        |                                       | 8.59         | 7.49         | 9.87   |         |
| <b>Cancer site</b>         | <b>Oesophageal</b> | 1,703              | 996    | 58.5%          | (56.1%, 60.8%)    | 3.10           | 2.77           | 3.46   | <0.0001                                 | 4.37         | 3.88         | 4.92   | <0.0001                               | 4.42         | 3.88         | 5.04   | <0.0001 |
|                            | <b>Stomach</b>     | 1,656              | 1,029  | 62.1%          | (59.8%, 64.4%)    | 3.61           | 3.22           | 4.04   |                                         | 3.92         | 3.47         | 4.43   |                                       | 3.19         | 2.79         | 3.66   |         |
|                            | <b>Colon</b>       | 6,142              | 1,920  | 31.3%          | (30.1%, 32.4%)    | (ref)          | (ref)          | (ref)  |                                         | (ref)        | (ref)        | (ref)  |                                       | (ref)        | (ref)        | (ref)  |         |
|                            | <b>Rectal</b>      | 2,577              | 532    | 20.6%          | (19.1%, 22.3%)    | 0.57           | 0.51           | 0.64   |                                         | 0.80         | 0.71         | 0.90   |                                       | 0.84         | 0.74         | 0.95   |         |
|                            | <b>Liver</b>       | 1,155              | 791    | 68.5%          | (65.7%, 71.1%)    | 4.78           | 4.18           | 5.48   |                                         | 4.99         | 4.32         | 5.78   |                                       | 3.81         | 3.24         | 4.47   |         |
|                            | <b>Pancreatic</b>  | 1,965              | 1,502  | 76.4%          | (74.5%, 78.3%)    | 7.13           | 6.35           | 8.03   |                                         | 7.24         | 6.39         | 8.22   |                                       | 5.08         | 4.43         | 5.83   |         |
|                            | <b>Lung</b>        | 9,365              | 6,096  | 65.1%          | (64.1%, 66.1%)    | 4.10           | 3.83           | 4.39   |                                         | 4.79         | 4.45         | 5.17   |                                       | 4.47         | 4.11         | 4.87   |         |
| <b>Ovarian</b>             | 1,576              | 404                | 25.6%  | (23.5%, 27.8%) | 0.76              | 0.67           | 0.86           |        | 0.86                                    | 0.75         | 0.99         |        | 0.91                                  | 0.78         | 1.06         |        |         |

| Alberta                    |                    | All patients | 12-month mortality |                |                | Crude odds ratios |                |                |         | Adjusted odds ratios (stage unadjusted) |              |              |         | Adjusted odds ratios (stage adjusted) |              |              |         |
|----------------------------|--------------------|--------------|--------------------|----------------|----------------|-------------------|----------------|----------------|---------|-----------------------------------------|--------------|--------------|---------|---------------------------------------|--------------|--------------|---------|
|                            |                    |              | Mort               | %Mort          | 95% CI         | Crude OR          | Crude OR (LCI) | Crude OR (UCI) | p(COR)  | Adj OR                                  | Adj OR (LCI) | Adj OR (UCI) | p(AOR)  | Adj OR                                | Adj OR (LCI) | Adj OR (UCI) | p(AOR)  |
| <b>Total</b>               |                    | 25,182       | 10,438             | 41·5%          | (40·8%, 42·1%) |                   |                |                |         |                                         |              |              |         |                                       |              |              |         |
| <b>Presentation status</b> | <b>Elective</b>    | 17,741       | 5,599              | 31·6%          | (30·9%, 32·2%) | (ref)             | (ref)          | (ref)          | <0·0001 | (ref)                                   | (ref)        | (ref)        | <0·0001 | (ref)                                 | (ref)        | (ref)        | <0·0001 |
|                            | <b>Emergency</b>   | 7,441        | 4,839              | 65·0%          | (63·9%, 66·1%) | 4·03              | 3·81           | 4·27           |         | 3·86                                    | 3·62         | 4·12         |         | 2·63                                  | 2·45         | 2·83         |         |
| <b>Sex</b>                 | <b>Male</b>        | 13,235       | 5,702              | 43·1%          | (42·2%, 43·9%) | (ref)             | (ref)          | (ref)          | <0·0001 | (ref)                                   | (ref)        | (ref)        | <0·0001 | (ref)                                 | (ref)        | (ref)        | <0·0001 |
|                            | <b>Female</b>      | 11,947       | 4,736              | 39·6%          | (38·8%, 40·5%) | 0·87              | 0·83           | 0·91           |         | 0·80                                    | 0·76         | 0·86         |         | 0·82                                  | 0·77         | 0·88         |         |
| <b>Diagnosis year</b>      | <b>2012</b>        | 4,628        | 1,962              | 42·4%          | (41·0%, 43·8%) | 0·98              | 0·90           | 1·06           | 0·025   | 1·03                                    | 0·94         | 1·13         | 0·0090  | 1·04                                  | 0·93         | 1·15         | 0·26    |
|                            | <b>2013</b>        | 4,812        | 2,067              | 43·0%          | (41·6%, 44·4%) | (ref)             | (ref)          | (ref)          |         | (ref)                                   | (ref)        | (ref)        |         | (ref)                                 | (ref)        | (ref)        |         |
|                            | <b>2014</b>        | 5,307        | 2,193              | 41·3%          | (40·0%, 42·7%) | 0·94              | 0·86           | 1·01           |         | 0·97                                    | 0·89         | 1·06         |         | 1·01                                  | 0·90         | 1·12         |         |
|                            | <b>2015</b>        | 5,222        | 2,121              | 40·6%          | (39·3%, 42·0%) | 0·91              | 0·84           | 0·98           |         | 0·94                                    | 0·85         | 1·03         |         | 0·97                                  | 0·88         | 1·08         |         |
|                            | <b>2016</b>        | 5,213        | 2,095              | 40·2%          | (38·9%, 41·5%) | 0·89              | 0·82           | 0·97           |         | 0·91                                    | 0·83         | 0·99         |         | 0·94                                  | 0·84         | 1·04         |         |
| <b>Age group</b>           | <b>15-64</b>       | 9,717        | 3,033              | 31·2%          | (30·3%, 32·1%) | 0·66              | 0·62           | 0·71           | <0·0001 | 0·72                                    | 0·67         | 0·77         | <0·0001 | 0·59                                  | 0·54         | 0·64         | <0·0001 |
|                            | <b>65-74</b>       | 7,245        | 2,939              | 40·6%          | (39·4%, 41·7%) | (ref)             | (ref)          | (ref)          |         | (ref)                                   | (ref)        | (ref)        |         | (ref)                                 | (ref)        | (ref)        |         |
|                            | <b>75-84</b>       | 5,877        | 2,915              | 49·6%          | (48·3%, 50·9%) | 1·44              | 1·35           | 1·55           |         | 1·43                                    | 1·32         | 1·54         |         | 1·71                                  | 1·56         | 1·88         |         |
|                            | <b>85+</b>         | 2,343        | 1,551              | 66·2%          | (64·3%, 68·1%) | 2·87              | 2·60           | 3·16           |         | 3·02                                    | 2·70         | 3·38         |         | 3·91                                  | 3·44         | 4·45         |         |
| <b>Stage</b>               | <b>1</b>           | 4,927        | 405                | 8·2%           | (7·5%, 9·0%)   | (ref)             | (ref)          | (ref)          | <0·0001 |                                         |              |              |         | (ref)                                 | (ref)        | (ref)        | <0·0001 |
|                            | <b>2</b>           | 3,804        | 740                | 19·5%          | (18·2%, 20·7%) | 2·70              | 2·37           | 3·07           |         |                                         |              |              |         | 2·47                                  | 2·14         | 2·85         |         |
|                            | <b>3</b>           | 5,575        | 1,557              | 27·9%          | (26·8%, 29·1%) | 4·33              | 3·85           | 4·87           |         |                                         |              |              |         | 5·47                                  | 4·81         | 6·23         |         |
|                            | <b>4</b>           | 9,703        | 7,142              | 73·6%          | (72·7%, 74·5%) | 31·14             | 27·89          | 34·84          |         |                                         |              |              |         | 29·3                                  | 25·93        | 33·18        |         |
|                            | <b>Unknown</b>     | 1,173        | 594                | 50·6%          | (47·8%, 53·5%) | 11·45             | 9·83           | 13·36          |         |                                         |              |              |         | 8·97                                  | 7·53         | 10·70        |         |
| <b>Cancer site</b>         | <b>Oesophageal</b> | 891          | 507                | 56·9%          | (53·6%, 60·1%) | 5·43              | 4·69           | 6·28           | <0·0001 | 7·67                                    | 6·56         | 8·97         | <0·0001 | 5·72                                  | 4·79         | 6·82         | <0·0001 |
|                            | <b>Stomach</b>     | 1,297        | 674                | 52·0%          | (49·2%, 54·7%) | 4·45              | 3·93           | 5·04           |         | 5·02                                    | 4·38         | 5·75         |         | 3·75                                  | 3·23         | 4·37         |         |
|                            | <b>Colon</b>       | 6,445        | 1,261              | 19·6%          | (18·6%, 20·6%) | (ref)             | (ref)          | (ref)          |         | (ref)                                   | (ref)        | (ref)        |         | (ref)                                 | (ref)        | (ref)        |         |
|                            | <b>Rectal</b>      | 2,487        | 341                | 13·7%          | (12·4%, 15·1%) | 0·65              | 0·57           | 0·74           |         | 0·90                                    | 0·79         | 1·04         |         | 0·83                                  | 0·71         | 0·96         |         |
|                            | <b>Liver</b>       | 1,332        | 654                | 49·1%          | (46·4%, 51·8%) | 3·97              | 3·50           | 4·49           |         | 5·11                                    | 4·47         | 5·84         |         | 7·31                                  | 6·26         | 8·53         |         |
|                            | <b>Pancreatic</b>  | 2,117        | 1,541              | 72·8%          | (70·9%, 74·6%) | 11·00             | 9·82           | 12·33          |         | 12·67                                   | 11·22        | 14·32        |         | 11·06                                 | 9·62         | 12·74        |         |
|                            | <b>Lung</b>        | 9,441        | 5,171              | 54·8%          | (53·8%, 55·8%) | 4·98              | 4·63           | 5·36           |         | 5·85                                    | 5·40         | 6·34         |         | 4·14                                  | 3·77         | 4·53         |         |
| <b>Ovarian</b>             | 1,172              | 289          | 24·7%              | (22·3%, 27·2%) | 1·35           | 1·16              | 1·56           |                | 1·87    | 1·59                                    | 2·20         |              | 1·84    | 1·54                                  | 2·20         |              |         |

| Atlantic Canada S          |                    | All patients | 12-month mortality |       |                | Crude odds ratios |                |                |         | Adjusted odds ratios (stage unadjusted) |              |              |         | Adjusted odds ratios (stage adjusted) |              |              |         |
|----------------------------|--------------------|--------------|--------------------|-------|----------------|-------------------|----------------|----------------|---------|-----------------------------------------|--------------|--------------|---------|---------------------------------------|--------------|--------------|---------|
|                            |                    |              | Mort               | %Mort | 95% CI         | Crude OR          | Crude OR (LCI) | Crude OR (UCI) | p(COR)  | Adj OR                                  | Adj OR (LCI) | Adj OR (UCI) | p(AOR)  | Adj OR                                | Adj OR (LCI) | Adj OR (UCI) | p(AOR)  |
| <b>Total</b>               |                    | 10,970       | 4,600              | 41.9% | (41.0%, 42.9%) |                   |                |                |         |                                         |              |              |         |                                       |              |              |         |
| <b>Presentation status</b> | <b>Elective</b>    | 8,065        | 2,745              | 34.0% | (33.0%, 35.1%) | (ref)             | (ref)          | (ref)          | <0.0001 | (ref)                                   | (ref)        | (ref)        | <0.0001 | (ref)                                 | (ref)        | (ref)        | <0.0001 |
|                            | <b>Emergency</b>   | 2,905        | 1,855              | 63.9% | (62.1%, 65.6%) | 3.42              | 3.13           | 3.74           |         | 3.79                                    | 3.42         | 4.21         |         | 2.74                                  | 2.44         | 3.08         |         |
| <b>Sex</b>                 | <b>Male</b>        | 6,010        | 2,615              | 43.5% | (42.3%, 44.8%) | (ref)             | (ref)          | (ref)          | 0.00031 | (ref)                                   | (ref)        | (ref)        | <0.0001 | (ref)                                 | (ref)        | (ref)        | 0.0020  |
|                            | <b>Female</b>      | 4,955        | 1,980              | 40.0% | (38.6%, 41.3%) | 0.87              | 0.81           | 0.94           |         | 0.84                                    | 0.77         | 0.92         |         | 0.85                                  | 0.77         | 0.94         |         |
| <b>Diagnosis year</b>      | <b>2012</b>        | 5,420        | 2,240              | 41.3% | (40.0%, 42.6%) | 0.97              | 0.90           | 1.05           | 0.49    | 0.99                                    | 0.90         | 1.08         | 0.91    | 0.98                                  | 0.88         | 1.08         | 0.77    |
|                            | <b>2013</b>        | 5,565        | 2,345              | 42.1% | (40.8%, 43.4%) | (ref)             | (ref)          | (ref)          |         | (ref)                                   | (ref)        | (ref)        |         | (ref)                                 | (ref)        | (ref)        |         |
| <b>Age group</b>           | <b>15-64</b>       | 3,635        | 1,210              | 33.3% | (31.8%, 34.8%) | 0.74              | 0.67           | 0.81           | <0.0001 | 0.74                                    | 0.66         | 0.83         | <0.0001 | 0.62                                  | 0.55         | 0.70         | <0.0001 |
|                            | <b>65-74</b>       | 3,615        | 1,460              | 40.4% | (38.8%, 42%)   | (ref)             | (ref)          | (ref)          |         | (ref)                                   | (ref)        | (ref)        |         | (ref)                                 | (ref)        | (ref)        |         |
|                            | <b>75-84</b>       | 2,705        | 1,295              | 47.9% | (46.0%, 49.8%) | 1.36              | 1.23           | 1.50           |         | 1.40                                    | 1.25         | 1.57         |         | 1.69                                  | 1.49         | 1.93         |         |
|                            | <b>85+</b>         | 1,015        | 640                | 63.1% | (60.0%, 66.0%) | 2.49              | 2.16           | 2.87           |         | 2.91                                    | 2.45         | 3.45         |         | 3.67                                  | 3.04         | 4.43         |         |
| <b>Stage</b>               | <b>1</b>           | 2,215        | 315                | 14.2% | (12.8%, 15.7%) | (ref)             | (ref)          | (ref)          | <0.0001 |                                         |              |              |         | (ref)                                 | (ref)        | (ref)        | <0.0001 |
|                            | <b>2</b>           | 1,615        | 265                | 16.4% | (14.7%, 18.3%) | 1.22              | 1.03           | 1.46           |         |                                         |              |              |         | 1.66                                  | 1.36         | 2.02         |         |
|                            | <b>3</b>           | 2,255        | 655                | 29.0% | (27.2%, 31.0%) | 2.39              | 2.06           | 2.78           |         |                                         |              |              |         | 3.49                                  | 2.95         | 4.13         |         |
|                            | <b>4</b>           | 3,630        | 2,655              | 73.1% | (71.7%, 74.6%) | 16.32             | 14.21          | 18.79          |         |                                         |              |              |         | 18.51                                 | 15.81        | 21.74        |         |
|                            | <b>Unknown</b>     | 1,245        | 705                | 56.6% | (53.9%, 59.4%) | 8.14              | 6.92           | 9.60           |         |                                         |              |              |         | 5.07                                  | 4.15         | 6.19         |         |
| <b>Cancer site</b>         | <b>Oesophageal</b> | 330          | 180                | 54.5% | (49.2%, 59.8%) | 5.82              | 4.60           | 7.39           | <0.0001 | 8.24                                    | 6.40         | 10.63        | <0.0001 | 9.93                                  | 7.49         | 13.18        | <0.0001 |
|                            | <b>Stomach</b>     | 585          | 295                | 50.4% | (46.4%, 54.5%) | 5.10              | 4.23           | 6.15           |         | 6.07                                    | 4.95         | 7.43         |         | 6.51                                  | 5.17         | 8.21         |         |
|                            | <b>Colon</b>       | 3,055        | 515                | 16.9% | (15.6%, 18.2%) | (ref)             | (ref)          | (ref)          |         | (ref)                                   | (ref)        | (ref)        |         | (ref)                                 | (ref)        | (ref)        |         |
|                            | <b>Rectal</b>      | 1,060        | 175                | 16.5% | (14.4%, 18.9%) | 0.98              | 0.81           | 1.18           |         | 1.41                                    | 1.15         | 1.71         |         | 1.47                                  | 1.18         | 1.82         |         |
|                            | <b>Liver</b>       | 335          | 220                | 65.7% | (60.4%, 70.6%) | 8.60              | 6.77           | 10.98          |         | 10.70                                   | 8.27         | 13.88        |         | 12.82                                 | 9.54         | 17.28        |         |
|                            | <b>Pancreatic</b>  | 730          | 570                | 78.1% | (74.9%, 80.9%) | 16.77             | 13.79          | 20.48          |         | 20.97                                   | 17.05        | 25.92        |         | 20.50                                 | 16.23        | 26.02        |         |
|                            | <b>Lung</b>        | 4,470        | 2,495              | 55.8% | (54.4%, 57.3%) | 6.16              | 5.52           | 6.89           |         | 8.19                                    | 7.25         | 9.26         |         | 7.21                                  | 6.30         | 8.27         |         |
|                            | <b>Ovarian</b>     | 420          | 135                | 32.1% | (27.9%, 36.8%) | 2.38              | 1.90           | 2.97           |         | 3.17                                    | 2.48         | 4.06         |         | 3.46                                  | 2.62         | 4.54         |         |

| British Columbia \$        |                    | All patients | 12-month mortality |       |                | Crude odds ratios |                |                |         | Adjusted odds ratios (stage unadjusted) |              |              |         | Adjusted odds ratios (stage adjusted) |              |              |         |
|----------------------------|--------------------|--------------|--------------------|-------|----------------|-------------------|----------------|----------------|---------|-----------------------------------------|--------------|--------------|---------|---------------------------------------|--------------|--------------|---------|
|                            |                    |              | Mort               | %Mort | 95% CI         | Crude OR          | Crude OR (LCI) | Crude OR (UCI) | p(COR)  | Adj OR                                  | Adj OR (LCI) | Adj OR (UCI) | p(AOR)  | Adj OR                                | Adj OR (LCI) | Adj OR (UCI) | p(AOR)  |
| <b>Total</b>               |                    | 16,490       | 6,875              | 41.7% | (40.9%, 42.4%) |                   |                |                |         |                                         |              |              |         |                                       |              |              |         |
| <b>Presentation status</b> | <b>Elective</b>    | 11,295       | 3,555              | 31.5% | (30.6%, 32.3%) | (ref)             | (ref)          | (ref)          | <0.0001 | (ref)                                   | (ref)        | (ref)        | <0.0001 | (ref)                                 | (ref)        | (ref)        | <0.0001 |
|                            | <b>Emergency</b>   | 5,195        | 3,320              | 63.9% | (62.6%, 65.2%) | 3.84              | 3.59           | 4.12           |         | 4.01                                    | 3.70         | 4.36         |         | 3.11                                  | 2.85         | 3.39         |         |
| <b>Sex</b>                 | <b>Male</b>        | 8,655        | 3,760              | 43.4% | (42.4%, 44.5%) | (ref)             | (ref)          | (ref)          | <0.0001 | (ref)                                   | (ref)        | (ref)        | <0.0001 | (ref)                                 | (ref)        | (ref)        | <0.0001 |
|                            | <b>Female</b>      | 7,840        | 3,115              | 39.7% | (38.7%, 40.8%) | 0.86              | 0.81           | 0.92           |         | 0.84                                    | 0.77         | 0.90         |         | 0.85                                  | 0.79         | 0.93         |         |
| <b>Diagnosis year</b>      | <b>2012</b>        | 8,110        | 3,315              | 40.9% | (39.8%, 41.9%) | 0.95              | 0.89           | 1.01           | 0.081   | 0.95                                    | 0.88         | 1.03         | 0.096   | 0.95                                  | 0.88         | 1.03         | 0.14    |
|                            | <b>2013</b>        | 8,370        | 3,525              | 42.1% | (41.1%, 43.2%) | (ref)             | (ref)          | (ref)          |         | (ref)                                   | (ref)        | (ref)        |         | (ref)                                 | (ref)        | (ref)        |         |
| <b>Age group</b>           | <b>15-64</b>       | 5,315        | 1,735              | 32.6% | (31.4%, 33.9%) | 0.74              | 0.68           | 0.80           | <0.0001 | 0.76                                    | 0.69         | 0.83         | <0.0001 | 0.68                                  | 0.62         | 0.76         | <0.0001 |
|                            | <b>65-74</b>       | 4,830        | 1,925              | 39.9% | (38.5%, 41.2%) | (ref)             | (ref)          | (ref)          |         | (ref)                                   | (ref)        | (ref)        |         | (ref)                                 | (ref)        | (ref)        |         |
|                            | <b>75-84</b>       | 4,375        | 2,025              | 46.3% | (44.8%, 47.8%) | 1.31              | 1.21           | 1.43           |         | 1.38                                    | 1.26         | 1.53         |         | 1.50                                  | 1.35         | 1.67         |         |
|                            | <b>85+</b>         | 1,960        | 1,190              | 60.7% | (58.5%, 62.9%) | 2.31              | 2.07           | 2.57           |         | 2.77                                    | 2.43         | 3.15         |         | 3.02                                  | 2.62         | 3.49         |         |
| <b>Stage</b>               | <b>1</b>           | 2,110        | 155                | 7.3%  | (6.3%, 8.5%)   | (ref)             | (ref)          | (ref)          | <0.0001 |                                         |              |              |         | (ref)                                 | (ref)        | (ref)        | <0.0001 |
|                            | <b>2</b>           | 1,965        | 210                | 10.7% | (9.4%, 12.1%)  | 1.49              | 1.20           | 1.85           |         |                                         |              |              |         | 2.10                                  | 1.67         | 2.65         |         |
|                            | <b>3</b>           | 2,820        | 745                | 26.4% | (24.8%, 28.1%) | 4.46              | 3.73           | 5.37           |         |                                         |              |              |         | 5.08                                  | 4.18         | 6.19         |         |
|                            | <b>4</b>           | 4,180        | 2,805              | 67.1% | (65.7%, 68.5%) | 25.38             | 21.38          | 30.32          |         |                                         |              |              |         | 21.38                                 | 17.78        | 25.87        |         |
|                            | <b>Unknown^</b>    | 5,405        | 2,930              | 54.2% | (52.9%, 55.5%) | 14.68             | 12.42          | 17.48          |         |                                         |              |              |         | 10.43                                 | 8.34         | 13.10        |         |
| <b>Cancer site</b>         | <b>Oesophageal</b> | 565          | 325                | 57.5% | (53.4%, 61.5%) | 7.31              | 6.08           | 8.79           | <0.0001 | 10.89                                   | 8.94         | 13.28        | <0.0001 | 6.37                                  | 5.01         | 8.11         | <0.0001 |
|                            | <b>Stomach</b>     | 770          | 395                | 51.3% | (47.8%, 54.8%) | 5.84              | 4.97           | 6.88           |         | 6.47                                    | 5.42         | 7.72         |         | 3.93                                  | 3.15         | 4.91         |         |
|                            | <b>Colon</b>       | 4,540        | 715                | 15.7% | (14.7%, 16.8%) | (ref)             | (ref)          | (ref)          |         | (ref)                                   | (ref)        | (ref)        |         | (ref)                                 | (ref)        | (ref)        |         |
|                            | <b>Rectal</b>      | 1,655        | 235                | 14.2% | (12.6%, 16%)   | 0.92              | 0.78           | 1.07           |         | 1.35                                    | 1.14         | 1.59         |         | 1.20                                  | 1.00         | 1.43         |         |
|                            | <b>Liver</b>       | 870          | 560                | 64.4% | (61.1%, 67.5%) | 10.01             | 8.53           | 11.76          |         | 13.44                                   | 11.30        | 16.01        |         | 8.17                                  | 6.55         | 10.21        |         |
|                            | <b>Pancreatic</b>  | 1,305        | 980                | 75.1% | (72.7%, 77.4%) | 16.44             | 14.18          | 19.11          |         | 21.08                                   | 17.98        | 24.77        |         | 12.48                                 | 10.11        | 15.43        |         |
|                            | <b>Lung</b>        | 6,015        | 3,440              | 57.2% | (55.9%, 58.4%) | 7.17              | 6.53           | 7.89           |         | 9.40                                    | 8.47         | 10.44        |         | 7.60                                  | 6.78         | 8.53         |         |
|                            | <b>Ovarian</b>     | 760          | 190                | 25.0% | (22.1%, 28.2%) | 1.78              | 1.48           | 2.13           |         | 2.31                                    | 1.88         | 2.82         |         | 1.44                                  | 1.13         | 1.83         |         |

| Ontario                    |                    | All patients | 12-month mortality |                |                | Crude odds ratios |                |                |         | Adjusted odds ratios (stage unadjusted) |              |              |         | Adjusted odds ratios (stage adjusted) |              |              |         |
|----------------------------|--------------------|--------------|--------------------|----------------|----------------|-------------------|----------------|----------------|---------|-----------------------------------------|--------------|--------------|---------|---------------------------------------|--------------|--------------|---------|
|                            |                    |              | Mort               | %Mort          | 95% CI         | Crude OR          | Crude OR (LCI) | Crude OR (UCI) | p(COR)  | Adj OR                                  | Adj OR (LCI) | Adj OR (UCI) | p(AOR)  | Adj OR                                | Adj OR (LCI) | Adj OR (UCI) | p(AOR)  |
| <b>Total</b>               |                    | 92,447       | 34,820             | 37.7%          | (37.4%, 38%)   |                   |                |                |         |                                         |              |              |         |                                       |              |              |         |
| <b>Presentation status</b> | <b>Elective</b>    | 68,316       | 20,197             | 29.6%          | (29.2%, 29.9%) | (ref)             | (ref)          | (ref)          | <0.0001 | (ref)                                   | (ref)        | (ref)        | <0.0001 | (ref)                                 | (ref)        | (ref)        | <0.0001 |
|                            | <b>Emergency</b>   | 24,131       | 14,623             | 60.6%          | (60.0%, 61.2%) | 3.66              | 3.55           | 3.78           |         | 3.87                                    | 3.74         | 4.00         |         | 2.95                                  | 2.84         | 3.06         |         |
| <b>Sex</b>                 | <b>Male</b>        | 48,146       | 19,457             | 40.4%          | (40.0%, 40.9%) | (ref)             | (ref)          | (ref)          | <0.0001 | (ref)                                   | (ref)        | (ref)        | <0.0001 | (ref)                                 | (ref)        | (ref)        | <0.0001 |
|                            | <b>Female</b>      | 44,301       | 15,363             | 34.7%          | (34.2%, 35.1%) | 0.78              | 0.76           | 0.80           |         | 0.77                                    | 0.75         | 0.80         |         | 0.79                                  | 0.76         | 0.82         |         |
| <b>Diagnosis year</b>      | <b>2012</b>        | 18,090       | 6,974              | 38.6%          | (37.8%, 39.3%) | 1.03              | 0.99           | 1.08           | 0.037   | 1.06                                    | 1.01         | 1.11         | <0.0001 | 1.05                                  | 1.00         | 1.11         | <0.0001 |
|                            | <b>2013</b>        | 17,978       | 6,794              | 37.8%          | (37.1%, 38.5%) | (ref)             | (ref)          | (ref)          |         | (ref)                                   | (ref)        | (ref)        |         | (ref)                                 | (ref)        | (ref)        |         |
|                            | <b>2014</b>        | 18,513       | 6,875              | 37.1%          | (36.4%, 37.8%) | 0.97              | 0.93           | 1.01           |         | 0.94                                    | 0.89         | 0.99         |         | 0.94                                  | 0.89         | 0.99         |         |
|                            | <b>2015</b>        | 18,859       | 7,108              | 37.7%          | (37.0%, 38.4%) | 1.00              | 0.95           | 1.04           |         | 0.95                                    | 0.90         | 0.99         |         | 0.95                                  | 0.90         | 1.00         |         |
|                            | <b>2016</b>        | 19,007       | 7,069              | 37.2%          | (36.5%, 37.9%) | 0.97              | 0.93           | 1.02           |         | 0.91                                    | 0.87         | 0.95         |         | 0.91                                  | 0.87         | 0.96         |         |
| <b>Age group</b>           | <b>15-64</b>       | 33,177       | 9,876              | 29.8%          | (29.3%, 30.3%) | 0.71              | 0.68           | 0.73           | <0.0001 | 0.78                                    | 0.75         | 0.81         | <0.0001 | 0.69                                  | 0.66         | 0.72         | <0.0001 |
|                            | <b>65-74</b>       | 28,027       | 10,512             | 37.5%          | (36.9%, 38.1%) | (ref)             | (ref)          | (ref)          |         | (ref)                                   | (ref)        | (ref)        |         | (ref)                                 | (ref)        | (ref)        |         |
|                            | <b>75-84</b>       | 23,184       | 10,210             | 44.0%          | (43.4%, 44.7%) | 1.31              | 1.27           | 1.36           |         | 1.39                                    | 1.34         | 1.45         |         | 1.59                                  | 1.52         | 1.66         |         |
|                            | <b>85+</b>         | 8,059        | 4,222              | 52.4%          | (51.3%, 53.5%) | 1.83              | 1.74           | 1.93           |         | 2.30                                    | 2.17         | 2.43         |         | 2.95                                  | 2.77         | 3.15         |         |
| <b>Stage</b>               | <b>1</b>           | 16,620       | 1,249              | 7.5%           | (7.1%, 7.9%)   | (ref)             | (ref)          | (ref)          | <0.0001 |                                         |              |              |         | (ref)                                 | (ref)        | (ref)        | <0.0001 |
|                            | <b>2</b>           | 13,177       | 1,864              | 14.1%          | (13.6%, 14.8%) | 2.03              | 1.88           | 2.19           |         |                                         |              |              |         | 2.21                                  | 2.04         | 2.40         |         |
|                            | <b>3</b>           | 19,476       | 5,201              | 26.7%          | (26.1%, 27.3%) | 4.48              | 4.20           | 4.79           |         |                                         |              |              |         | 5.07                                  | 4.73         | 5.44         |         |
|                            | <b>4</b>           | 27,579       | 19,015             | 68.9%          | (68.4%, 69.5%) | 27.32             | 25.67          | 29.12          |         |                                         |              |              |         | 22.73                                 | 21.27        | 24.32        |         |
|                            | <b>Unknown</b>     | 15,595       | 7,491              | 48.0%          | (47.3%, 48.8%) | 11.38             | 10.66          | 12.15          |         |                                         |              |              |         | 8.62                                  | 8.00         | 9.29         |         |
| <b>Cancer site</b>         | <b>Oesophageal</b> | 3,099        | 1,710              | 55.2%          | (53.4%, 56.9%) | 6.00              | 5.55           | 6.49           | <0.0001 | 8.2                                     | 7.55         | 8.91         | <0.0001 | 5.44                                  | 4.97         | 5.96         | <0.0001 |
|                            | <b>Stomach</b>     | 6,465        | 2,796              | 43.2%          | (42.0%, 44.5%) | 3.72              | 3.50           | 3.94           |         | 4.34                                    | 4.07         | 4.63         |         | 2.87                                  | 2.67         | 3.09         |         |
|                            | <b>Colon</b>       | 24,481       | 4,167              | 17.0%          | (16.6%, 17.5%) | (ref)             | (ref)          | (ref)          |         | (ref)                                   | (ref)        | (ref)        |         | (ref)                                 | (ref)        | (ref)        |         |
|                            | <b>Rectal</b>      | 7,845        | 1,016              | 13.0%          | (12.2%, 13.7%) | 0.73              | 0.67           | 0.78           |         | 1.01                                    | 0.94         | 1.09         |         | 0.99                                  | 0.91         | 1.07         |         |
|                            | <b>Liver</b>       | 4,129        | 1,964              | 47.6%          | (46.0%, 49.1%) | 4.42              | 4.13           | 4.74           |         | 5.55                                    | 5.16         | 5.98         |         | 4.59                                  | 4.22         | 4.98         |         |
|                            | <b>Pancreatic</b>  | 6,456        | 4,089              | 63.3%          | (62.2%, 64.5%) | 8.42              | 7.93           | 8.95           |         | 10.48                                   | 9.82         | 11.18        |         | 7.29                                  | 6.78         | 7.83         |         |
|                            | <b>Lung</b>        | 35,092       | 17,973             | 51.2%          | (50.7%, 51.7%) | 5.12              | 4.92           | 5.32           |         | 6.51                                    | 6.24         | 6.80         |         | 4.59                                  | 4.38         | 4.81         |         |
| <b>Ovarian</b>             | 4,880              | 1,105        | 22.6%              | (21.5%, 23.8%) | 1.43           | 1.32              | 1.54           |                | 2.08    | 1.92                                    | 2.26         |              | 1.72    | 1.57                                  | 1.87         |              |         |

| Saskatchewan-Manitoba \$   |                    | All patients | 12-month mortality |       |                | Crude odds ratios |                |                |         | Adjusted odds ratios (stage unadjusted) |              |              |         | Adjusted odds ratios (stage adjusted) |              |              |         |
|----------------------------|--------------------|--------------|--------------------|-------|----------------|-------------------|----------------|----------------|---------|-----------------------------------------|--------------|--------------|---------|---------------------------------------|--------------|--------------|---------|
|                            |                    |              | Mort               | %Mort | 95% CI         | Crude OR          | Crude OR (LCI) | Crude OR (UCI) | p(COR)  | Adj OR                                  | Adj OR (LCI) | Adj OR (UCI) | p(AOR)  | Adj OR                                | Adj OR (LCI) | Adj OR (UCI) | p(AOR)  |
| <b>Total</b>               |                    | 8,385        | 3,475              | 41.4% | (40.4%, 42.5%) |                   |                |                |         |                                         |              |              |         |                                       |              |              |         |
| <b>Presentation status</b> | <b>Elective</b>    | 5,985        | 1,955              | 32.7% | (31.5%, 33.9%) | (ref)             | (ref)          | (ref)          | <0.0001 | (ref)                                   | (ref)        | (ref)        | <0.0001 | (ref)                                 | (ref)        | (ref)        | <0.0001 |
|                            | <b>Emergency</b>   | 2,400        | 1,520              | 63.3% | (61.4%, 65.2%) | 3.57              | 3.24           | 3.95           |         | 3.77                                    | 3.36         | 4.24         |         | 2.72                                  | 2.39         | 3.09         |         |
| <b>Sex</b>                 | <b>Male</b>        | 4,405        | 1,885              | 42.8% | (41.3%, 44.3%) | (ref)             | (ref)          | (ref)          | 0.0031  | (ref)                                   | (ref)        | (ref)        | <0.0001 | (ref)                                 | (ref)        | (ref)        | 0.0015  |
|                            | <b>Female</b>      | 3,975        | 1,590              | 40.0% | (38.5%, 41.5%) | 0.88              | 0.80           | 0.96           |         | 0.8                                     | 0.72         | 0.89         |         | 0.83                                  | 0.73         | 0.93         |         |
| <b>Diagnosis year</b>      | <b>2012</b>        | 4,080        | 1,720              | 42.2% | (40.6%, 43.7%) | 1.05              | 0.97           | 1.15           | 0.24    | 1.09                                    | 0.99         | 1.21         | 0.13    | 1.07                                  | 0.96         | 1.20         | 0.34    |
|                            | <b>2013</b>        | 4,270        | 1,755              | 41.1% | (39.6%, 42.6%) | (ref)             | (ref)          | (ref)          |         | (ref)                                   | (ref)        | (ref)        |         | (ref)                                 | (ref)        | (ref)        |         |
| <b>Age group</b>           | <b>15-64</b>       | 2,770        | 865                | 31.2% | (29.5%, 33.0%) | 0.65              | 0.58           | 0.73           | <0.0001 | 0.73                                    | 0.64         | 0.83         | <0.0001 | 0.63                                  | 0.54         | 0.73         | <0.0001 |
|                            | <b>65-74</b>       | 2,510        | 1,025              | 40.8% | (38.9%, 42.8%) | (ref)             | (ref)          | (ref)          |         | (ref)                                   | (ref)        | (ref)        |         | (ref)                                 | (ref)        | (ref)        |         |
|                            | <b>75-84</b>       | 2,110        | 1,010              | 47.9% | (45.7%, 50.0%) | 1.34              | 1.19           | 1.50           |         | 1.34                                    | 1.17         | 1.54         |         | 1.64                                  | 1.40         | 1.91         |         |
|                            | <b>85+</b>         | 990          | 580                | 58.6% | (55.5%, 61.6%) | 2.01              | 1.74           | 2.34           |         | 2.44                                    | 2.04         | 2.91         |         | 3.23                                  | 2.65         | 3.95         |         |
| <b>Stage</b>               | <b>1</b>           | 1,705        | 255                | 15.0% | (13.3%, 16.7%) | (ref)             | (ref)          | (ref)          | <0.0001 |                                         |              |              |         | (ref)                                 | (ref)        | (ref)        | <0.0001 |
|                            | <b>2</b>           | 1,345        | 290                | 21.6% | (19.4%, 23.8%) | 1.62              | 1.34           | 1.96           |         |                                         |              |              |         | 1.72                                  | 1.39         | 2.13         |         |
|                            | <b>3</b>           | 1,810        | 505                | 27.9% | (25.9%, 30.0%) | 2.41              | 2.04           | 2.87           |         |                                         |              |              |         | 3.19                                  | 2.63         | 3.87         |         |
|                            | <b>4</b>           | 3,070        | 2,215              | 72.1% | (70.5%, 73.7%) | 16.31             | 13.95          | 19.14          |         |                                         |              |              |         | 15.57                                 | 13.01        | 18.70        |         |
|                            | <b>Unknown</b>     | 435          | 220                | 50.6% | (45.9%, 55.2%) | 6.33              | 5.03           | 7.99           |         |                                         |              |              |         | 5.21                                  | 3.95         | 6.87         |         |
| <b>Cancer site</b>         | <b>Oesophageal</b> | 220          | 130                | 59.1% | (52.5%, 65.4%) | 8.05              | 6.01           | 10.84          | <0.0001 | 12.41                                   | 9.12         | 16.99        | <0.0001 | 12.09                                 | 8.64         | 17.01        | <0.0001 |
|                            | <b>Stomach</b>     | 430          | 225                | 52.3% | (47.6%, 57.0%) | 5.09              | 4.10           | 6.34           |         | 5.70                                    | 4.51         | 7.22         |         | 5.02                                  | 3.88         | 6.49         |         |
|                            | <b>Colon</b>       | 2,285        | 380                | 16.6% | (15.2%, 18.2%) | (ref)             | (ref)          | (ref)          |         | (ref)                                   | (ref)        | (ref)        |         | (ref)                                 | (ref)        | (ref)        |         |
|                            | <b>Rectal</b>      | 920          | 150                | 16.3% | (14.1%, 18.8%) | 0.97              | 0.78           | 1.19           |         | 1.35                                    | 1.08         | 1.68         |         | 1.31                                  | 1.03         | 1.65         |         |
|                            | <b>Liver</b>       | 295          | 190                | 64.4% | (58.8%, 69.7%) | 9.31              | 7.17           | 12.16          |         | 11.88                                   | 8.98         | 15.79        |         | 14.41                                 | 10.57        | 19.73        |         |
|                            | <b>Pancreatic</b>  | 660          | 495                | 75.0% | (71.6%, 78.2%) | 15.02             | 12.23          | 18.53          |         | 18.43                                   | 14.8         | 23.05        |         | 15.97                                 | 12.52        | 20.46        |         |
|                            | <b>Lung</b>        | 3,185        | 1,825              | 57.3% | (55.6%, 59.0%) | 6.73              | 5.91           | 7.68           |         | 8.54                                    | 7.41         | 9.87         |         | 6.10                                  | 5.22         | 7.15         |         |
|                            | <b>Ovarian</b>     | 355          | 80                 | 22.5% | (18.5%, 27.2%) | 1.52              | 1.16           | 1.98           |         | 2.08                                    | 1.55         | 2.78         |         | 2.05                                  | 1.48         | 2.82         |         |



| New South Wales            |                                | All patients | 12-month mortality |       |                | Crude odds ratios |                |                |         | Adjusted odds ratios (stage unadjusted) |              |              |         | Adjusted odds ratios (stage adjusted) |              |              |         |
|----------------------------|--------------------------------|--------------|--------------------|-------|----------------|-------------------|----------------|----------------|---------|-----------------------------------------|--------------|--------------|---------|---------------------------------------|--------------|--------------|---------|
|                            |                                |              | Mort               | %Mort | 95% CI         | Crude OR          | Crude OR (LCI) | Crude OR (UCI) | p(COR)  | Adj OR                                  | Adj OR (LCI) | Adj OR (UCI) | p(AOR)  | Adj OR                                | Adj OR (LCI) | Adj OR (UCI) | p(AOR)  |
| <b>Total</b>               |                                | 53,198       | 19,499             | 36.7% | (36.2%, 37.1%) |                   |                |                |         |                                         |              |              |         |                                       |              |              |         |
| <b>Presentation status</b> | <b>Elective</b>                | 36,753       | 9,663              | 26.3% | (25.8%, 26.7%) | (ref)             | (ref)          | (ref)          | <0.0001 | (ref)                                   | (ref)        | (ref)        | <0.0001 | (ref)                                 | (ref)        | (ref)        | <0.0001 |
|                            | <b>Emergency</b>               | 16,445       | 9,836              | 59.8% | (59.1%, 60.6%) | 4.17              | 4.01           | 4.34           |         | 3.74                                    | 3.58         | 3.91         |         | 2.89                                  | 2.75         | 3.03         |         |
| <b>Sex</b>                 | <b>Male</b>                    | 29,037       | 11,366             | 39.1% | (38.6%, 39.7%) | (ref)             | (ref)          | (ref)          | <0.0001 | (ref)                                   | (ref)        | (ref)        | <0.0001 | (ref)                                 | (ref)        | (ref)        | <0.0001 |
|                            | <b>Female</b>                  | 24,161       | 8,133              | 33.7% | (33.1%, 34.3%) | 0.79              | 0.76           | 0.82           |         | 0.80                                    | 0.77         | 0.84         |         | 0.82                                  | 0.78         | 0.86         |         |
| <b>Diagnosis year</b>      | <b>2012</b>                    | 10,361       | 3,961              | 38.2% | (37.3%, 39.2%) | (ref)             | (ref)          | (ref)          | <0.0001 | (ref)                                   | (ref)        | (ref)        | <0.0001 | (ref)                                 | (ref)        | (ref)        | 0.098   |
|                            | <b>2013</b>                    | 10,368       | 3,870              | 37.3% | (36.4%, 38.3%) | 0.96              | 0.91           | 1.02           |         | 0.94                                    | 0.88         | 1.00         |         | 0.96                                  | 0.89         | 1.03         |         |
|                            | <b>2014</b>                    | 10,432       | 3,842              | 36.8% | (35.9%, 37.8%) | 0.94              | 0.89           | 1.00           |         | 0.94                                    | 0.88         | 1.00         |         | 0.96                                  | 0.90         | 1.03         |         |
|                            | <b>2015</b>                    | 10,903       | 3,860              | 35.4% | (34.5%, 36.3%) | 0.89              | 0.84           | 0.94           |         | 0.84                                    | 0.79         | 0.90         |         | 0.91                                  | 0.84         | 0.97         |         |
|                            | <b>2016</b>                    | 11,134       | 3,966              | 35.6% | (34.7%, 36.5%) | 0.89              | 0.85           | 0.94           |         | 0.85                                    | 0.80         | 0.91         |         | 0.92                                  | 0.85         | 0.98         |         |
| <b>Age group</b>           | <b>15-64</b>                   | 17,708       | 4,796              | 27.1% | (26.4%, 27.7%) | 0.74              | 0.70           | 0.77           | <0.0001 | 0.72                                    | 0.68         | 0.76         | <0.0001 | 0.63                                  | 0.59         | 0.66         | <0.0001 |
|                            | <b>65-74</b>                   | 16,085       | 5,384              | 33.5% | (32.7%, 34.2%) | (ref)             | (ref)          | (ref)          |         | (ref)                                   | (ref)        | (ref)        |         | (ref)                                 | (ref)        | (ref)        |         |
|                            | <b>75-84</b>                   | 13,802       | 6,033              | 43.7% | (42.9%, 44.5%) | 1.54              | 1.47           | 1.62           |         | 1.65                                    | 1.56         | 1.74         |         | 1.85                                  | 1.75         | 1.97         |         |
|                            | <b>85+</b>                     | 5,603        | 3,286              | 58.6% | (57.4%, 59.9%) | 2.82              | 2.65           | 3.00           |         | 3.27                                    | 3.03         | 3.52         |         | 4.31                                  | 3.98         | 4.67         |         |
| <b>Stage</b>               | <b>Localised</b>               | 14,325       | 2,589              | 18.1% | (17.5%, 18.7%) | (ref)             | (ref)          | (ref)          | <0.0001 |                                         |              |              |         | (ref)                                 | (ref)        | (ref)        | <0.0001 |
|                            | <b>Inv. adjc. tissue/organ</b> | 6,262        | 1,198              | 19.1% | (18.2%, 20.1%) | 1.07              | 0.99           | 1.16           |         |                                         |              |              |         | 1.41                                  | 1.29         | 1.54         |         |
|                            | <b>Inv. regional LNs</b>       | 8,854        | 1,766              | 19.9% | (19.1%, 20.8%) | 1.13              | 1.06           | 1.21           |         |                                         |              |              |         | 1.53                                  | 1.42         | 1.66         |         |
|                            | <b>Distant metastasis</b>      | 17,181       | 11,431             | 66.5% | (65.8%, 67.2%) | 9.01              | 8.55           | 9.50           |         |                                         |              |              |         | 10.56                                 | 9.90         | 11.27        |         |
|                            | <b>Unknown</b>                 | 6,576        | 2,515              | 38.2% | (37.1%, 39.4%) | 2.81              | 2.63           | 3.00           |         |                                         |              |              |         | 2.25                                  | 2.08         | 2.42         |         |
| <b>Cancer site</b>         | <b>Oesophageal</b>             | 1,970        | 1,053              | 53.5% | (51.2%, 55.6%) | 5.76              | 5.22           | 6.35           | <0.0001 | 7.34                                    | 6.61         | 8.15         | <0.0001 | 8.19                                  | 7.30         | 9.18         | <0.0001 |
|                            | <b>Stomach</b>                 | 3,179        | 1,313              | 41.3% | (39.6%, 43.0%) | 3.53              | 3.25           | 3.83           |         | 4.09                                    | 3.75         | 4.47         |         | 3.82                                  | 3.47         | 4.21         |         |
|                            | <b>Colon</b>                   | 16,316       | 2,714              | 16.6% | (16.1%, 17.2%) | (ref)             | (ref)          | (ref)          |         | (ref)                                   | (ref)        | (ref)        |         | (ref)                                 | (ref)        | (ref)        |         |
|                            | <b>Rectal</b>                  | 5,459        | 645                | 11.8% | (11.0%, 12.7%) | 0.67              | 0.61           | 0.74           |         | 0.96                                    | 0.87         | 1.05         |         | 1.03                                  | 0.92         | 1.14         |         |
|                            | <b>Liver</b>                   | 3,155        | 1,630              | 51.7% | (49.9%, 53.4%) | 5.36              | 4.94           | 5.81           |         | 6.81                                    | 6.24         | 7.45         |         | 10.67                                 | 9.65         | 11.79        |         |
|                            | <b>Pancreatic</b>              | 4,498        | 2,965              | 65.9% | (64.5%, 67.3%) | 9.69              | 9.00           | 10.44          |         | 10.74                                   | 9.91         | 11.64        |         | 8.70                                  | 7.97         | 9.50         |         |
|                            | <b>Lung</b>                    | 16,334       | 8,681              | 53.1% | (52.4%, 53.9%) | 5.69              | 5.40           | 5.99           |         | 6.68                                    | 6.31         | 7.06         |         | 5.12                                  | 4.81         | 5.45         |         |
|                            | <b>Ovarian</b>                 | 2,287        | 498                | 21.8% | (20.1%, 23.5%) | 1.40              | 1.25           | 1.55           |         | 1.85                                    | 1.64         | 2.07         |         | 0.72                                  | 0.64         | 0.82         |         |

| Victoria                   | All patients                   | 12-month mortality |        |        | Crude odds ratios |                |                |        | Adjusted odds ratios (stage unadjusted) |              |              |        | Adjusted odds ratios (stage adjusted) |              |              |        |         |
|----------------------------|--------------------------------|--------------------|--------|--------|-------------------|----------------|----------------|--------|-----------------------------------------|--------------|--------------|--------|---------------------------------------|--------------|--------------|--------|---------|
|                            |                                | Mort               | %Mort  | 95% CI | Crude OR          | Crude OR (LCI) | Crude OR (UCI) | p(COR) | Adj OR                                  | Adj OR (LCI) | Adj OR (UCI) | p(AOR) | Adj OR                                | Adj OR (LCI) | Adj OR (UCI) | p(AOR) |         |
|                            | <b>Total</b>                   | 38,212             | 12,885 | 33.7%  | (33.2%, 34.2%)    |                |                |        |                                         |              |              |        |                                       |              |              |        |         |
| <b>Presentation status</b> | <b>Elective</b>                | 29,047             | 7,557  | 26.0%  | (25.5%, 26.5%)    | (ref)          | (ref)          | (ref)  | <0.0001                                 | (ref)        | (ref)        | (ref)  | <0.0001                               | (ref)        | (ref)        | (ref)  | <0.0001 |
|                            | <b>Emergency</b>               | 9,165              | 5,328  | 58.1%  | (57.1%, 59.1%)    | 3.95           | 3.76           | 4.15   |                                         | 3.70         | 3.50         | 3.92   |                                       | 3.33         | 3.15         | 3.53   |         |
| <b>Sex</b>                 | <b>Male</b>                    | 20,720             | 7,484  | 36.1%  | (35.5%, 36.8%)    | (ref)          | (ref)          | (ref)  | <0.0001                                 | (ref)        | (ref)        | (ref)  | <0.0001                               | (ref)        | (ref)        | (ref)  | <0.0001 |
|                            | <b>Female</b>                  | 17,492             | 5,401  | 30.9%  | (30.2%, 31.6%)    | 0.79           | 0.76           | 0.82   |                                         | 0.82         | 0.78         | 0.86   |                                       | 0.82         | 0.78         | 0.86   |         |
| <b>Diagnosis year</b>      | <b>2012</b>                    | 7,045              | 2,333  | 33.1%  | (32.0%, 34.2%)    | (ref)          | (ref)          | (ref)  | 0.0067                                  | (ref)        | (ref)        | (ref)  | 0.049                                 | (ref)        | (ref)        | (ref)  | 0.035   |
|                            | <b>2013</b>                    | 7,232              | 2,373  | 32.8%  | (31.7%, 33.9%)    | 0.99           | 0.92           | 1.06   |                                         | 0.98         | 0.91         | 1.06   |                                       | 0.98         | 0.90         | 1.07   |         |
|                            | <b>2014</b>                    | 7,646              | 2,530  | 33.1%  | (32.0%, 34.2%)    | 1.00           | 0.93           | 1.07   |                                         | 0.93         | 0.86         | 1.01   |                                       | 0.92         | 0.85         | 1.00   |         |
|                            | <b>2015</b>                    | 7,961              | 2,807  | 35.3%  | (34.2%, 36.3%)    | 1.10           | 1.03           | 1.18   |                                         | 1.03         | 0.95         | 1.12   |                                       | 1.02         | 0.94         | 1.11   |         |
|                            | <b>2016</b>                    | 8,328              | 2,842  | 34.1%  | (33.1%, 35.2%)    | 1.05           | 0.98           | 1.12   |                                         | 0.95         | 0.88         | 1.03   |                                       | 0.95         | 0.88         | 1.03   |         |
| <b>Age group</b>           | <b>15-64</b>                   | 12,568             | 2,820  | 22.4%  | (21.7%, 23.2%)    | 0.65           | 0.61           | 0.69   | <0.0001                                 | 0.69         | 0.65         | 0.74   | <0.0001                               | 0.65         | 0.61         | 0.69   | <0.0001 |
|                            | <b>65-74</b>                   | 11,016             | 3,390  | 30.8%  | (29.9%, 31.6%)    | (ref)          | (ref)          | (ref)  |                                         | (ref)        | (ref)        | (ref)  |                                       | (ref)        | (ref)        | (ref)  |         |
|                            | <b>75-84</b>                   | 10,188             | 4,131  | 40.5%  | (39.6%, 41.5%)    | 1.53           | 1.45           | 1.62   |                                         | 1.64         | 1.54         | 1.75   |                                       | 1.69         | 1.58         | 1.81   |         |
|                            | <b>85+</b>                     | 4,440              | 2,544  | 57.3%  | (55.8%, 58.7%)    | 3.02           | 2.81           | 3.24   |                                         | 3.63         | 3.34         | 3.96   |                                       | 3.83         | 3.50         | 4.19   |         |
| <b>Stage *</b>             | <b>Localised</b>               | 3,587              | 85     | 2.4%   | (1.9%, 2.9%)      | (ref)          | (ref)          | (ref)  | <0.0001                                 |              |              |        |                                       | (ref)        | (ref)        | (ref)  | <0.0001 |
|                            | <b>Inv. adjc. tissue/organ</b> | 4,011              | 194    | 4.8%   | (4.2%, 5.5%)      | 2.09           | 1.62           | 2.73   |                                         |              |              |        |                                       | 1.47         | 1.13         | 1.93   |         |
|                            | <b>Inv. regional LNs</b>       | 3,708              | 316    | 8.5%   | (7.7%, 9.5%)      | 3.84           | 3.02           | 4.93   |                                         |              |              |        |                                       | 3.14         | 2.46         | 4.05   |         |
|                            | <b>Distant metastasis</b>      | 2,727              | 1,188  | 43.6%  | (41.7%, 45.4%)    | 31.8           | 25.48          | 40.22  |                                         |              |              |        |                                       | 27.31        | 21.75        | 34.72  |         |
|                            | <b>Unknown^</b>                | 24,146             | 11,096 | 46.0%  | (45.3%, 46.6%)    | 35.03          | 28.41          | 43.83  |                                         |              |              |        |                                       | 10.08        | 7.95         | 12.94  |         |
| <b>Cancer site</b>         | <b>Oesophageal</b>             | 1,576              | 783    | 49.7%  | (47.2%, 52.1%)    | 5.27           | 4.72           | 5.89   | <0.0001                                 | 6.80         | 6.04         | 7.66   | <0.0001                               | 3.65         | 3.12         | 4.29   | <0.0001 |
|                            | <b>Stomach</b>                 | 2,597              | 1,105  | 42.5%  | (40.7%, 44.5%)    | 3.95           | 3.61           | 4.34   |                                         | 4.79         | 4.34         | 5.30   |                                       | 2.59         | 2.24         | 3.00   |         |
|                            | <b>Colon</b>                   | 11,747             | 1,853  | 15.8%  | (15.1%, 16.4%)    | (ref)          | (ref)          | (ref)  |                                         | (ref)        | (ref)        | (ref)  |                                       | (ref)        | (ref)        | (ref)  |         |
|                            | <b>Rectal</b>                  | 4,438              | 468    | 10.5%  | (9.7%, 11.5%)     | 0.63           | 0.56           | 0.70   |                                         | 0.89         | 0.79         | 0.99   |                                       | 0.79         | 0.69         | 0.89   |         |
|                            | <b>Liver</b>                   | 2,323              | 1,097  | 47.2%  | (45.2%, 49.3%)    | 4.78           | 4.34           | 5.26   |                                         | 5.89         | 5.31         | 6.54   |                                       | 3.25         | 2.81         | 3.78   |         |
|                            | <b>Pancreatic</b>              | 3,172              | 1,959  | 61.8%  | (60.1%, 63.4%)    | 8.62           | 7.91           | 9.41   |                                         | 9.98         | 9.08         | 10.97  |                                       | 5.43         | 4.71         | 6.26   |         |
|                            | <b>Lung</b>                    | 10,620             | 5,320  | 50.1%  | (49.1%, 51.0%)    | 5.36           | 5.04           | 5.71   |                                         | 6.48         | 6.05         | 6.94   |                                       | 3.51         | 3.09         | 3.98   |         |
|                            | <b>Ovarian</b>                 | 1,739              | 300    | 17.3%  | (15.5%, 19.1%)    | 1.11           | 0.97           | 1.27   |                                         | 1.63         | 1.41         | 1.89   |                                       | 0.90         | 0.75         | 1.08   |         |

| New Zealand                |                                | All patients | 12-month mortality |       |                | Crude odds ratios |                |                |         | Adjusted odds ratios (stage unadjusted) |              |              |         | Adjusted odds ratios (stage adjusted) |              |              |         |
|----------------------------|--------------------------------|--------------|--------------------|-------|----------------|-------------------|----------------|----------------|---------|-----------------------------------------|--------------|--------------|---------|---------------------------------------|--------------|--------------|---------|
|                            |                                |              | Mort               | %Mort | 95% CI         | Crude OR          | Crude OR (LCI) | Crude OR (UCI) | p(COR)  | Adj OR                                  | Adj OR (LCI) | Adj OR (UCI) | p(AOR)  | Adj OR                                | Adj OR (LCI) | Adj OR (UCI) | p(AOR)  |
|                            | <b>Total</b>                   | 28,794       | 12,225             | 42.5% | (41.9%, 43.0%) |                   |                |                |         |                                         |              |              |         |                                       |              |              |         |
| <b>Presentation status</b> | <b>Elective</b>                | 16,556       | 4,653              | 28.1% | (27.4%, 28.8%) | (ref)             | (ref)          | (ref)          | <0.0001 | (ref)                                   | (ref)        | (ref)        | <0.0001 | (ref)                                 | (ref)        | (ref)        | <0.0001 |
|                            | <b>Emergency</b>               | 12,238       | 7,572              | 61.9% | (61.0%, 62.7%) | 4.15              | 3.95           | 4.36           |         | 3.73                                    | 3.53         | 3.95         |         | 2.57                                  | 2.42         | 2.74         |         |
| <b>Sex</b>                 | <b>Male</b>                    | 14,751       | 6,496              | 44.0% | (43.2%, 44.8%) | (ref)             | (ref)          | (ref)          | <0.0001 | (ref)                                   | (ref)        | (ref)        | <0.0001 | (ref)                                 | (ref)        | (ref)        | <0.0001 |
|                            | <b>Female</b>                  | 14,043       | 5,729              | 40.8% | (40.0%, 41.6%) | 0.88              | 0.84           | 0.92           |         | 0.88                                    | 0.83         | 0.93         |         | 0.86                                  | 0.81         | 0.92         |         |
| <b>Diagnosis year</b>      | <b>2012</b>                    | 6,961        | 3,009              | 43.2% | (42.1%, 44.4%) | (ref)             | (ref)          | (ref)          | 0.059   | (ref)                                   | (ref)        | (ref)        | 0.00074 | (ref)                                 | (ref)        | (ref)        | 0.011   |
|                            | <b>2013</b>                    | 6,994        | 2,981              | 42.6% | (41.5%, 43.8%) | 0.98              | 0.91           | 1.04           |         | 0.96                                    | 0.88         | 1.04         |         | 0.97                                  | 0.89         | 1.06         |         |
|                            | <b>2014</b>                    | 7,447        | 3,193              | 42.9% | (41.8%, 44.0%) | 0.99              | 0.92           | 1.05           |         | 0.99                                    | 0.91         | 1.07         |         | 1.03                                  | 0.94         | 1.12         |         |
|                            | <b>2015</b>                    | 7,392        | 3,042              | 41.2% | (40.0%, 42.3%) | 0.92              | 0.86           | 0.98           |         | 0.85                                    | 0.78         | 0.92         |         | 0.88                                  | 0.81         | 0.96         |         |
| <b>Age group</b>           | <b>15-64</b>                   | 8,819        | 2,992              | 33.9% | (32.9%, 34.9%) | 0.80              | 0.75           | 0.85           | <0.0001 | 0.74                                    | 0.69         | 0.79         | <0.0001 | 0.66                                  | 0.61         | 0.72         | <0.0001 |
|                            | <b>65-74</b>                   | 8,785        | 3,430              | 39.0% | (38.0%, 40.1%) | (ref)             | (ref)          | (ref)          |         | (ref)                                   | (ref)        | (ref)        |         | (ref)                                 | (ref)        | (ref)        |         |
|                            | <b>75-84</b>                   | 7,887        | 3,716              | 47.1% | (46.0%, 48.2%) | 1.39              | 1.31           | 1.48           |         | 1.65                                    | 1.53         | 1.78         |         | 1.89                                  | 1.74         | 2.04         |         |
|                            | <b>85+</b>                     | 3,303        | 2,087              | 63.2% | (61.5%, 64.8%) | 2.68              | 2.47           | 2.91           |         | 3.62                                    | 3.28         | 3.99         |         | 4.27                                  | 3.83         | 4.76         |         |
| <b>Stage</b>               | <b>Local</b>                   | 3,893        | 184                | 4.7%  | (4.1%, 5.4%)   | 0.02              | 0.02           | 0.02           | <0.0001 |                                         |              |              |         | 0.03                                  | 0.03         | 0.04         | <0.0001 |
|                            | <b>Inv. adjc. tissue/organ</b> | 2,421        | 299                | 12.4% | (11.1%, 13.7%) | 0.06              | 0.05           | 0.06           |         |                                         |              |              |         | 0.08                                  | 0.07         | 0.09         |         |
|                            | <b>Inv. regional LNs</b>       | 4,213        | 890                | 21.1% | (19.9%, 22.4%) | 0.11              | 0.10           | 0.12           |         |                                         |              |              |         | 0.13                                  | 0.12         | 0.14         |         |
|                            | <b>Distant metastasis</b>      | 9,766        | 6,990              | 71.6% | (70.7%, 72.5%) | (ref)             | (ref)          | (ref)          |         |                                         |              |              |         | (ref)                                 | (ref)        | (ref)        |         |
|                            | <b>Unkown</b>                  | 8,501        | 3,862              | 45.4% | (44.4%, 46.5%) | 0.33              | 0.31           | 0.35           |         |                                         |              |              |         | 0.24                                  | 0.22         | 0.26         |         |
| <b>Cancer site</b>         | <b>Oesophageal</b>             | 1,196        | 733                | 61.3% | (58.5%, 64.0%) | 5.46              | 4.82           | 6.20           | <0.0001 | 7.24                                    | 6.31         | 8.30         | <0.0001 | 5.09                                  | 4.38         | 5.91         | <0.0001 |
|                            | <b>Stomach</b>                 | 1,520        | 821                | 54.0% | (51.5%, 56.5%) | 4.05              | 3.62           | 4.53           |         | 4.81                                    | 4.26         | 5.44         |         | 3.51                                  | 3.07         | 4.03         |         |
|                            | <b>Colon</b>                   | 9,502        | 2,136              | 22.5% | (21.7%, 23.3%) | (ref)             | (ref)          | (ref)          |         | (ref)                                   | (ref)        | (ref)        |         | (ref)                                 | (ref)        | (ref)        |         |
|                            | <b>Rectal</b>                  | 3,247        | 503                | 15.5% | (14.3%, 16.8%) | 0.63              | 0.57           | 0.70           |         | 0.89                                    | 0.79         | 1.00         |         | 0.77                                  | 0.68         | 0.87         |         |
|                            | <b>Liver</b>                   | 1,243        | 721                | 58.0% | (55.2%, 60.7%) | 4.76              | 4.22           | 5.39           |         | 6.15                                    | 5.38         | 7.04         |         | 5.61                                  | 4.82         | 6.53         |         |
|                            | <b>Pancreatic</b>              | 2,182        | 1,694              | 77.6% | (75.8%, 79.3%) | 11.97             | 10.71          | 13.40          |         | 12.97                                   | 11.51        | 14.63        |         | 7.70                                  | 6.75         | 8.80         |         |
|                            | <b>Lung</b>                    | 8,481        | 5,209              | 61.4% | (60.4%, 62.5%) | 5.49              | 5.14           | 5.86           |         | 6.53                                    | 6.08         | 7.02         |         | 4.42                                  | 4.08         | 4.80         |         |
|                            | <b>Ovarian</b>                 | 1,423        | 408                | 28.7% | (26.4%, 31.1%) | 1.39              | 1.22           | 1.57           |         | 1.61                                    | 1.40         | 1.85         |         | 0.64                                  | 0.55         | 0.74         |         |

Mort: 12-month mortality; CI: Confidence Interval; OR: Odds ratio; LCI: Lower confidence interval; UCI: Upper confidence interval; COR: Crude odds ratio; Adj: Adjusted; AOR: Adjusted odds ratio; Inv: Invading; Adjc: Adjacent; LNs: Lymph Nodes; Ref: Reference category

\* Data shown for stage categories in Victoria does not include 33 cases in groups other than shown.

^ For British Columbia the unknown stage category includes all cases other than colon, rectal and lung, and the proportion of cases with the latter three cancers with unknown stage. For Victoria, the unknown stage category includes all cases other than colon and rectal, and the proportion of cases with the latter two cancers with unknown stage.

\$ For Atlantic Canada, British Columbia, and Saskatchewan-Manitoba, random rounding within cells to a multiple of 5 was used for the tabulated variable groups, to adhere to rules for minimising residual disclosure risk.

**Supplementary Material 11. Meta-analysis of associations between emergency presentation status (defined as diagnosis of cancer within 30 days after an emergency hospital admission) and 12-month mortality (adjusted for person-level variables other than stage, and emergency presentation broad/narrow definition subtype)**

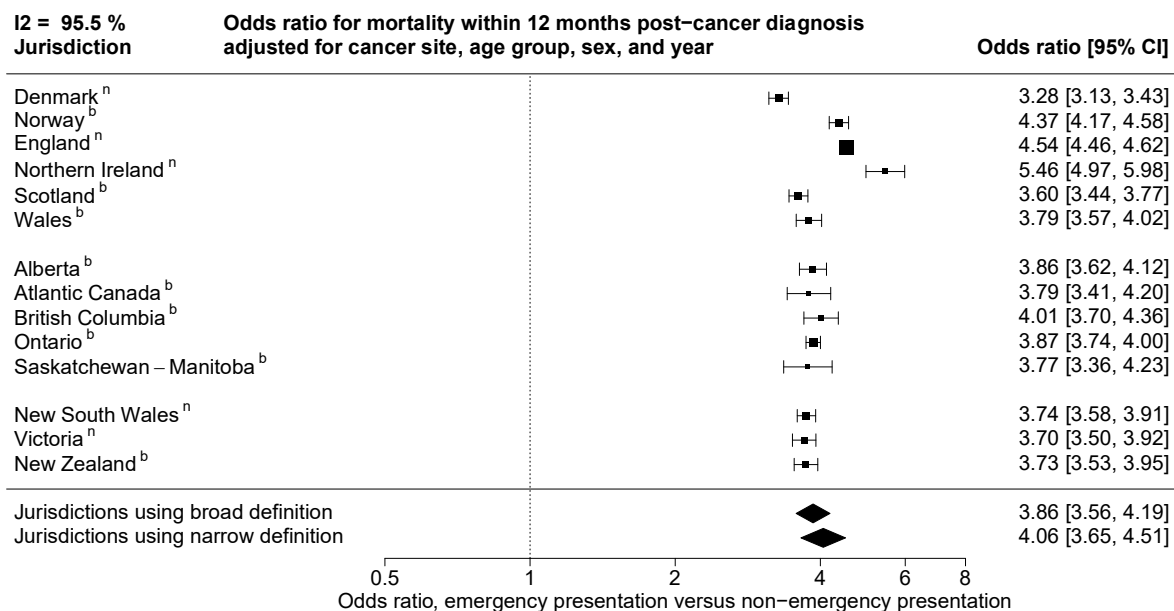

**Supplementary Material 12. Estimates used in analysis of jurisdiction-specific associations between emergency presentation (defined as diagnosis of cancer within 30 days after an emergency hospital admission) and cancer survival. 1-year net survival data relate to references 1 (Arnold et al.) and 18 (Rutherford et al.); data on percentage of emergency presentations relate to the present study.**

| A.                   | Oesophageal |                         | Stomach |                         | Colon  |                         | Rectal |                         |
|----------------------|-------------|-------------------------|---------|-------------------------|--------|-------------------------|--------|-------------------------|
|                      | EP (%)      | 1-year net survival (%) | EP (%)  | 1-year net survival (%) | EP (%) | 1-year net survival (%) | EP (%) | 1-year net survival (%) |
| Denmark              | 24.3        | 44.4                    | 32.2    | 52.5                    | 28.3   | 82.8                    | 13.5   | 87.6                    |
| Norway               | 32.7        | 47.3                    | 40.0    | 53.5                    | 35.8   | 82.6                    | 15.8   | 89.1                    |
| England              | 19.7        | 46.6                    | 31.4    | 47.4                    | 29.3   | 77.0                    | 10.7   | 84.9                    |
| Northern Ireland     | 19.9        | 48.5                    | 29.6    | 45.0                    | 23.8   | 80.0                    | 9.1    | 84.6                    |
| Scotland             | 25.2        | 44.9                    | 39.1    | 45.0                    | 35.1   | 77.4                    | 14.1   | 84.6                    |
| Wales                | 25.5        | 46.4                    | 39.1    | 43.6                    | 34.2   | 74.7                    | 13.8   | 84.9                    |
| Alberta              | 23.0        | 41.1                    | 34.6    | 49.0                    | 28.6   | 82.3                    | 12.9   | 86.5                    |
| British Columbia     | 28.3        | 46.5                    | 40.3    | 48.3                    | 27.5   | 83.6                    | 12.0   | 87.7                    |
| Manitoba             | 14.0        | 37.5                    | 24.5    | 52.5                    | 24.5   | 81.5                    | 11.7   | 84.5                    |
| New Brunswick        | 18.2        | 46.7                    | 27.6    | 49.7                    | 30.2   | 84.1                    | 11.6   | 85.3                    |
| Nova Scotia          | 20.6        | 41.5                    | 37.3    | 47.0                    | 28.3   | 78.8                    | 13.1   | 81.6                    |
| Ontario              | 20.3        | 44.3                    | 26.9    | 55.4                    | 27.2   | 84.2                    | 11.0   | 87.0                    |
| Prince Edward Island | 33.3        | 36.8                    | 25.0    | 49.9                    | 24.0   | 82.1                    | 13.6   | 87.3                    |
| Saskatchewan         | 23.3        | 41.3                    | 37.8    | 51.5                    | 30.8   | 83.1                    | 15.6   | 85.2                    |
| New South Wales      | 26.9        | 46.5                    | 30.5    | 56.1                    | 27.6   | 86.9                    | 12.1   | 88.7                    |
| Victoria             | 20.0        | 53.4                    | 23.7    | 60.7                    | 22.9   | 87.1                    | 9.1    | 90.8                    |
| New Zealand          | 36.8        | 44.1                    | 47.8    | 49.0                    | 36.6   | 80.8                    | 19.8   | 85.9                    |

  

| B.                   | Liver  |                         | Pancreatic |                         | Lung   |                         | Ovarian |                         |
|----------------------|--------|-------------------------|------------|-------------------------|--------|-------------------------|---------|-------------------------|
|                      | EP (%) | 1-year net survival (%) | EP (%)     | 1-year net survival (%) | EP (%) | 1-year net survival (%) | EP (%)  | 1-year net survival (%) |
| Denmark              | 43.3   | 37.1                    | 48.0       | 31.1                    | 36.4   | 46.2                    | 20.6    | 77.4                    |
| Norway               | 50.6   | 40.9                    | 55.4       | 30.5                    | 39.4   | 46.7                    | 34.9    | 77.5                    |
| England              | 42.4   | 36.4                    | 46.9       | 26.7                    | 34.7   | 39.2                    | 34.8    | 70.8                    |
| Northern Ireland     | 36.9   | 37.2                    | 42.7       | 20.9                    | 32.0   | 36.9                    | 29.6    | 66.2                    |
| Scotland             | 47.5   | 42.7                    | 59.2       | 24.4                    | 42.1   | 38.5                    | 42.8    | 68.5                    |
| Wales                | 50.5   | 37.2                    | 56.7       | 25.6                    | 41.5   | 36.8                    | 40.8    | 68.6                    |
| Alberta              | 31.7   | 45.9                    | 40.9       | 29.8                    | 33.3   | 47.0                    | 25.7    | 71.2                    |
| British Columbia     | 38.1   | 36.9                    | 41.4       | 29.7                    | 33.2   | 46.4                    | 31.7    | 75.2                    |
| Manitoba             | 26.5   | 35.0                    | 30.8       | 31.2                    | 26.1   | 45.3                    | 22.8    | 77.1                    |
| New Brunswick        | 42.5   | 39.1                    | 45.6       | 28.5                    | 26.2   | 51.7                    | 37.5    | 67.8                    |
| Nova Scotia          | 24.1   | 40.9                    | 30.8       | 21.6                    | 23.8   | 43.4                    | 23.9    | 67.0                    |
| Ontario              | 28.3   | 46.0                    | 35.3       | 33.8                    | 27.5   | 47.5                    | 23.9    | 72.4                    |
| Prince Edward Island | 50.0   | 49.3                    | 37.5       | 27.2                    | 38.7   | 41.6                    | 22.2    | 65.9                    |
| Saskatchewan         | 41.7   | 35.4                    | 44.1       | 30.2                    | 36.1   | 46.1                    | 39.7    | 71.7                    |
| New South Wales      | 36.8   | 46.4                    | 45.3       | 35.5                    | 36.4   | 46.5                    | 28.4    | 76.3                    |
| Victoria             | 31.9   | 51.5                    | 34.1       | 40.6                    | 27.8   | 49.7                    | 20.9    | 78.5                    |
| New Zealand          | 49.7   | 41.8                    | 60.4       | 24.8                    | 51.1   | 39.9                    | 48.1    | 71.5                    |

EP: Emergency presentation.

**Supplementary Material 13: Numerator and denominator values relating to 1-, 3- and 12-month mortality by emergency presentation status. This supplement is an adjunct to Supplementary Material 9.**

Across the tables, superscript indicators ‘n’ and ‘b’ after jurisdictional names describe whether a narrow or broad operational definition of emergency presentation was used – please also see main paper-Methods, and appendix pp.4-5.

**A. 1-month mortality**

| Jurisdiction                          | EP       |             |             |                | Non-EP   |             |             |               | Difference, EP - non-EP |                |
|---------------------------------------|----------|-------------|-------------|----------------|----------|-------------|-------------|---------------|-------------------------|----------------|
|                                       | Patients | Deaths (1m) | Mortality % | (95% CI)       | Patients | Deaths (1m) | Mortality % | (95% CI)      | %-point                 | (95% CI)       |
| <i>Oesophageal cancer</i>             |          |             |             |                |          |             |             |               |                         |                |
| Denmark <sup>n</sup>                  | 461      | 92          | 20.0%       | (16.6%, 23.8%) | 1,435    | 56          | 3.9%        | (3.0%, 5.0%)  | 16.1%                   | (12.3%, 19.8%) |
| Norway <sup>b</sup>                   | 435      | 86          | 19.8%       | (16.3%, 23.8%) | 897      | 26          | 2.9%        | (2.0%, 4.2%)  | 16.9%                   | (13.0%, 20.8%) |
| England <sup>n</sup>                  | 5,364    | 1,594       | 29.7%       | (28.5%, 31.0%) | 21,910   | 807         | 3.7%        | (3.4%, 3.9%)  | 26.0%                   | (24.8%, 27.3%) |
| Northern Ireland <sup>n</sup>         | 193      | 45          | 23.3%       | (17.9%, 29.8%) | 779      | 31          | 4.0%        | (2.8%, 5.6%)  | 19.3%                   | (13.2%, 25.5%) |
| Scotland <sup>b</sup>                 | 851      | 158         | 18.6%       | (16.1%, 21.3%) | 2,527    | 66          | 2.6%        | (2.1%, 3.3%)  | 16.0%                   | (13.3%, 18.6%) |
| Wales <sup>b</sup>                    | 435      | 98          | 22.5%       | (18.9%, 26.7%) | 1,268    | 49          | 3.9%        | (2.9%, 5.1%)  | 18.7%                   | (14.6%, 22.7%) |
| Alberta <sup>b</sup>                  | 76       | 13          | 17.1%       | (10.3%, 27.1%) | 276      | 12          | 4.3%        | (2.5%, 7.4%)  | 12.8%                   | (4.0%, 21.6%)  |
| Atlantic Canada <sup>b</sup> \$       | 75       | 25          | 33.3%       | (23.7%, 44.6%) | 255      | 15          | 5.9%        | (3.6%, 9.5%)  | 27.5%                   | (16.4%, 38.5%) |
| British Columbia <sup>b</sup> \$      | 145      | 30          | 20.7%       | (14.9%, 28.0%) | 425      | 10          | 2.4%        | (1.3%, 4.3%)  | 18.3%                   | (11.6%, 25.1%) |
| Ontario <sup>b</sup>                  | 630      | 128         | 20.3%       | (17.4%, 23.6%) | 2,469    | 80          | 3.2%        | (2.6%, 4.0%)  | 17.1%                   | (13.9%, 20.3%) |
| Saskatchewan-Manitoba <sup>b</sup> \$ | 35       | 15          | 42.9%       | (28.0%, 59.1%) | 180      | 5           | 2.8%        | (1.2%, 6.3%)  | 40.1%                   | (23.5%, 56.6%) |
| New South Wales <sup>n</sup>          | 530      | 98          | 18.5%       | (15.4%, 22.0%) | 1,440    | 46          | 3.2%        | (2.4%, 4.2%)  | 15.3%                   | (11.9%, 18.7%) |
| Victoria <sup>n</sup>                 | 315      | 79          | 25.1%       | (20.6%, 30.1%) | 1,261    | 44          | 3.5%        | (2.6%, 4.7%)  | 21.6%                   | (16.7%, 26.5%) |
| New Zealand <sup>b</sup>              | 440      | 61          | 13.9%       | (10.9%, 17.4%) | 756      | 12          | 1.6%        | (0.9%, 2.8%)  | 12.3%                   | (8.9%, 15.6%)  |
| <i>Stomach cancer</i>                 |          |             |             |                |          |             |             |               |                         |                |
| Denmark <sup>n</sup>                  | 719      | 124         | 17.2%       | (14.7%, 20.2%) | 1,512    | 49          | 3.2%        | (2.5%, 4.3%)  | 14.0%                   | (11.1%, 16.9%) |
| Norway <sup>b</sup>                   | 943      | 153         | 16.2%       | (14.0%, 18.7%) | 1,414    | 36          | 2.5%        | (1.8%, 3.5%)  | 13.7%                   | (11.2%, 16.2%) |
| England <sup>n</sup>                  | 6,224    | 1,829       | 29.4%       | (28.3%, 30.5%) | 13,589   | 728         | 5.4%        | (5.0%, 5.7%)  | 24.0%                   | (22.8%, 25.2%) |
| Northern Ireland <sup>n</sup>         | 293      | 79          | 27.0%       | (22.2%, 32.3%) | 697      | 38          | 5.5%        | (4.0%, 7.4%)  | 21.5%                   | (16.2%, 26.9%) |
| Scotland <sup>b</sup>                 | 913      | 185         | 20.3%       | (17.8%, 23.0%) | 1,424    | 52          | 3.7%        | (2.8%, 4.8%)  | 16.6%                   | (13.8%, 19.4%) |
| Wales <sup>b</sup>                    | 648      | 162         | 25.0%       | (21.8%, 28.5%) | 1,008    | 43          | 4.3%        | (3.2%, 5.7%)  | 20.7%                   | (17.2%, 24.3%) |
| Alberta <sup>b</sup>                  | 161      | 35          | 21.7%       | (16.1%, 28.7%) | 323      | 22          | 6.8%        | (4.5%, 10.1%) | 14.9%                   | (8.0%, 21.9%)  |
| Atlantic Canada <sup>b</sup> \$       | 185      | 50          | 27.0%       | (21.1%, 33.8%) | 395      | 15          | 3.8%        | (2.3%, 6.2%)  | 23.2%                   | (16.6%, 29.9%) |
| British Columbia <sup>b</sup> \$      | 320      | 65          | 20.3%       | (16.3%, 25.1%) | 445      | 20          | 4.5%        | (2.9%, 6.8%)  | 15.8%                   | (11.0%, 20.6%) |
| Ontario <sup>b</sup>                  | 1,738    | 305         | 17.5%       | (15.8%, 19.4%) | 4,727    | 160         | 3.4%        | (2.9%, 3.9%)  | 14.2%                   | (12.3%, 16.0%) |
| Saskatchewan-Manitoba <sup>b</sup> \$ | 145      | 25          | 17.2%       | (12.0%, 24.2%) | 290      | 10          | 3.4%        | (1.9%, 6.2%)  | 13.8%                   | (7.3%, 20.3%)  |
| New South Wales <sup>n</sup>          | 969      | 140         | 14.4%       | (12.4%, 16.8%) | 2,210    | 55          | 2.5%        | (1.9%, 3.2%)  | 12.0%                   | (9.7%, 14.3%)  |
| Victoria <sup>n</sup>                 | 616      | 120         | 19.5%       | (16.5%, 22.8%) | 1,981    | 46          | 2.3%        | (1.7%, 3.1%)  | 17.2%                   | (14.0%, 20.4%) |
| New Zealand <sup>b</sup>              | 726      | 134         | 18.5%       | (15.8%, 21.4%) | 794      | 24          | 3.0%        | (2.0%, 4.5%)  | 15.4%                   | (12.4%, 18.5%) |
| <i>Colon cancer</i>                   |          |             |             |                |          |             |             |               |                         |                |
| Denmark <sup>n</sup>                  | 3,655    | 415         | 11.4%       | (10.4%, 12.4%) | 9,273    | 157         | 1.7%        | (1.4%, 2.0%)  | 9.7%                    | (8.6%, 10.7%)  |
| Norway <sup>b</sup>                   | 5,354    | 585         | 10.9%       | (10.1%, 11.8%) | 9,587    | 204         | 2.1%        | (1.9%, 2.4%)  | 8.8%                    | (7.9%, 9.7%)   |

|                                             |        |       |       |                |        |       |       |                |       |                |
|---------------------------------------------|--------|-------|-------|----------------|--------|-------|-------|----------------|-------|----------------|
| <b>England <sup>n</sup></b>                 | 25,859 | 5,104 | 19.7% | (19.3%, 20.2%) | 62,360 | 1,797 | 2.9%  | (2.8%, 3.0%)   | 16.9% | (16.4%, 17.4%) |
| <b>Northern Ireland <sup>n</sup></b>        | 914    | 153   | 16.7% | (14.5%, 19.3%) | 2,932  | 81    | 2.8%  | (2.2%, 3.4%)   | 14.0% | (11.5%, 16.5%) |
| <b>Scotland <sup>b</sup></b>                | 3,366  | 503   | 14.9% | (13.8%, 16.2%) | 6,234  | 131   | 2.1%  | (1.8%, 2.5%)   | 12.8% | (11.6%, 14.1%) |
| <b>Wales <sup>b</sup></b>                   | 2,102  | 357   | 17.0% | (15.4%, 18.6%) | 4,040  | 82    | 2.0%  | (1.6%, 2.5%)   | 15.0% | (13.3%, 16.6%) |
| <b>Alberta <sup>b</sup></b>                 | 747    | 98    | 13.1% | (10.9%, 15.7%) | 1,633  | 35    | 2.1%  | (1.5%, 3.0%)   | 11.0% | (8.5%, 13.5%)  |
| <b>Atlantic Canada <sup>b</sup>\$</b>       | 850    | 95    | 11.2% | (9.2%, 13.5%)  | 2,200  | 50    | 2.3%  | (1.7%, 3.0%)   | 8.9%  | (6.7%, 11.1%)  |
| <b>British Columbia <sup>b</sup>\$</b>      | 1,360  | 135   | 9.9%  | (8.4%, 11.6%)  | 3,185  | 50    | 1.6%  | (1.2%, 2.1%)   | 8.4%  | (6.7%, 10.0%)  |
| <b>Ontario <sup>b</sup></b>                 | 6,653  | 569   | 8.6%  | (7.9%, 9.2%)   | 17,828 | 255   | 1.4%  | (1.3%, 1.6%)   | 7.1%  | (6.4%, 7.8%)   |
| <b>Saskatchewan-Manitoba <sup>b</sup>\$</b> | 640    | 75    | 11.7% | (9.5%, 14.4%)  | 1,645  | 25    | 1.5%  | (1.0%, 2.2%)   | 10.2% | (7.6%, 12.8%)  |
| <b>New South Wales <sup>n</sup></b>         | 4,499  | 423   | 9.4%  | (8.6%, 10.3%)  | 11,817 | 144   | 1.2%  | (1.0%, 1.4%)   | 8.2%  | (7.3%, 9.1%)   |
| <b>Victoria <sup>n</sup></b>                | 2,689  | 288   | 10.7% | (9.6%, 11.9%)  | 9,058  | 130   | 1.4%  | (1.2%, 1.7%)   | 9.3%  | (8.1%, 10.5%)  |
| <b>New Zealand <sup>b</sup></b>             | 3,480  | 358   | 10.3% | (9.3%, 11.3%)  | 6,022  | 80    | 1.3%  | (1.1%, 1.7%)   | 9.0%  | (7.9%, 10.0%)  |
| <b>Rectal cancer</b>                        |        |       |       |                |        |       |       |                |       |                |
| <b>Denmark <sup>n</sup></b>                 | 811    | 69    | 8.5%  | (6.8%, 10.6%)  | 5,194  | 49    | 0.9%  | (0.7%, 1.2%)   | 7.6%  | (5.6%, 9.5%)   |
| <b>Norway <sup>b</sup></b>                  | 888    | 89    | 10.0% | (8.2%, 12.2%)  | 4,724  | 44    | 0.9%  | (0.7%, 1.2%)   | 9.1%  | (7.1%, 11.1%)  |
| <b>England <sup>n</sup></b>                 | 3,628  | 692   | 19.1% | (17.8%, 20.4%) | 30,277 | 403   | 1.3%  | (1.2%, 1.5%)   | 17.7% | (16.5%, 19.0%) |
| <b>Northern Ireland <sup>n</sup></b>        | 125    | 21    | 16.8% | (11.3%, 24.3%) | 1,251  | 13    | 1.0%  | (0.6%, 1.8%)   | 15.8% | (9.2%, 22.3%)  |
| <b>Scotland <sup>b</sup></b>                | 499    | 54    | 10.8% | (8.4%, 13.9%)  | 3,036  | 28    | 0.9%  | (0.6%, 1.3%)   | 9.9%  | (7.2%, 12.6%)  |
| <b>Wales <sup>b</sup></b>                   | 355    | 57    | 16.1% | (12.6%, 20.2%) | 2,222  | 23    | 1.0%  | (0.7%, 1.5%)   | 15.0% | (11.2%, 18.9%) |
| <b>Alberta <sup>b</sup></b>                 | 136    | 13    | 9.6%  | (5.7%, 15.7%)  | 817    | 10    | 1.2%  | (0.7%, 2.2%)   | 8.3%  | (3.3%, 13.3%)  |
| <b>Atlantic Canada <sup>b</sup>\$</b>       | 120    | 20    | 16.7% | (11.1%, 24.3%) | 935    | 10    | 1.1%  | (0.6%, 2.0%)   | 15.6% | (8.9%, 22.3%)  |
| <b>British Columbia <sup>b</sup>\$</b>      | 230    | 25    | 10.9% | (7.5%, 15.6%)  | 1,430  | 10    | 0.7%  | (0.4%, 1.3%)   | 10.2% | (6.1%, 14.2%)  |
| <b>Ontario <sup>b</sup></b>                 | 860    | 74    | 8.6%  | (6.9%, 10.7%)  | 6,985  | 41    | 0.6%  | (0.4%, 0.8%)   | 8.0%  | (6.1%, 9.9%)   |
| <b>Saskatchewan-Manitoba <sup>b</sup>\$</b> | 130    | 20    | 15.4% | (10.2%, 22.6%) | 795    | 5     | 0.6%  | (0.3%, 1.5%)   | 14.8% | (8.5%, 21.0%)  |
| <b>New South Wales <sup>n</sup></b>         | 660    | 42    | 6.4%  | (4.7%, 8.5%)   | 4,799  | 23    | 0.5%  | (0.3%, 0.7%)   | 5.9%  | (4.0%, 7.8%)   |
| <b>Victoria <sup>n</sup></b>                | 403    | 33    | 8.2%  | (5.9%, 11.3%)  | 4,035  | 25    | 0.6%  | (0.4%, 0.9%)   | 7.6%  | (4.9%, 10.3%)  |
| <b>New Zealand <sup>b</sup></b>             | 643    | 47    | 7.3%  | (5.5%, 9.6%)   | 2,604  | 18    | 0.7%  | (0.4%, 1.1%)   | 6.6%  | (4.6%, 8.7%)   |
| <b>Liver cancer</b>                         |        |       |       |                |        |       |       |                |       |                |
| <b>Denmark <sup>n</sup></b>                 | 668    | 190   | 28.4% | (25.2%, 32.0%) | 873    | 44    | 5.0%  | (3.8%, 6.7%)   | 23.4% | (19.7%, 27.1%) |
| <b>Norway <sup>b</sup></b>                  | 597    | 222   | 37.2% | (33.4%, 41.1%) | 584    | 74    | 12.7% | (10.2%, 15.6%) | 24.5% | (19.8%, 29.2%) |
| <b>England <sup>n</sup></b>                 | 7,497  | 2,631 | 35.1% | (34.0%, 36.2%) | 10,202 | 894   | 8.8%  | (8.2%, 9.3%)   | 26.3% | (25.1%, 27.5%) |
| <b>Northern Ireland <sup>n</sup></b>        | 215    | 86    | 40.0% | (33.7%, 46.7%) | 367    | 33    | 9.0%  | (6.5%, 12.4%)  | 31.0% | (23.8%, 38.2%) |
| <b>Scotland <sup>b</sup></b>                | 1,111  | 264   | 23.8% | (21.4%, 26.4%) | 1,229  | 55    | 4.5%  | (3.5%, 5.8%)   | 19.3% | (16.5%, 22.0%) |
| <b>Wales <sup>b</sup></b>                   | 583    | 164   | 28.1% | (24.6%, 31.9%) | 572    | 40    | 7.0%  | (5.2%, 9.4%)   | 21.1% | (16.9%, 25.3%) |
| <b>Alberta <sup>b</sup></b>                 | 152    | 51    | 33.6% | (26.5%, 41.4%) | 338    | 23    | 6.8%  | (4.6%, 10.0%)  | 26.7% | (18.8%, 34.7%) |
| <b>Atlantic Canada <sup>b</sup>\$</b>       | 115    | 40    | 34.8% | (26.7%, 43.9%) | 215    | 25    | 11.6% | (8.0%, 16.6%)  | 23.2% | (13.5%, 32.9%) |
| <b>British Columbia <sup>b</sup>\$</b>      | 340    | 120   | 35.3% | (30.4%, 40.5%) | 535    | 45    | 8.4%  | (6.3%, 11.1%)  | 26.9% | (21.3%, 32.5%) |
| <b>Ontario <sup>b</sup></b>                 | 1,167  | 188   | 16.1% | (14.1%, 18.3%) | 2,962  | 119   | 4.0%  | (3.4%, 4.8%)   | 12.1% | (9.9%, 14.3%)  |
| <b>Saskatchewan-Manitoba <sup>b</sup>\$</b> | 105    | 35    | 33.3% | (25.0%, 42.8%) | 190    | 20    | 10.5% | (6.9%, 15.7%)  | 22.8% | (12.8%, 32.8%) |
| <b>New South Wales <sup>n</sup></b>         | 1,161  | 309   | 26.6% | (24.2%, 29.2%) | 1,994  | 97    | 4.9%  | (4.0%, 5.9%)   | 21.8% | (19.0%, 24.5%) |
| <b>Victoria <sup>n</sup></b>                | 742    | 168   | 22.6% | (19.8%, 25.8%) | 1,581  | 89    | 5.6%  | (4.6%, 6.9%)   | 17.0% | (13.8%, 20.2%) |
| <b>New Zealand <sup>b</sup></b>             | 618    | 144   | 23.3% | (20.1%, 26.8%) | 625    | 22    | 3.5%  | (2.3%, 5.3%)   | 19.8% | (16.1%, 23.4%) |
| <b>Pancreatic cancer</b>                    |        |       |       |                |        |       |       |                |       |                |
| <b>Denmark <sup>n</sup></b>                 | 1,674  | 444   | 26.5% | (24.5%, 28.7%) | 1,817  | 176   | 9.7%  | (8.4%, 11.1%)  | 16.8% | (14.3%, 19.4%) |
| <b>Norway <sup>b</sup></b>                  | 2,059  | 677   | 32.9% | (30.9%, 34.9%) | 1,656  | 227   | 13.7% | (12.1%, 15.4%) | 19.2% | (16.6%, 21.8%) |
| <b>England <sup>n</sup></b>                 | 14,291 | 5,313 | 37.2% | (36.4%, 38.0%) | 16,151 | 2,062 | 12.8% | (12.3%, 13.3%) | 24.4% | (23.5%, 25.4%) |

|                                            |        |        |       |                |        |       |       |                |       |                |
|--------------------------------------------|--------|--------|-------|----------------|--------|-------|-------|----------------|-------|----------------|
| <b>Northern Ireland<sup>n</sup></b>        | 496    | 212    | 42.7% | (38.5%, 47.1%) | 666    | 83    | 12.5% | (10.2%, 15.2%) | 30.3% | (25.3%, 35.3%) |
| <b>Scotland<sup>b</sup></b>                | 1,809  | 456    | 25.2% | (23.3%, 27.3%) | 1,245  | 124   | 10.0% | (8.4%, 11.7%)  | 15.2% | (12.6%, 17.8%) |
| <b>Wales<sup>b</sup></b>                   | 1,115  | 326    | 29.2% | (26.6%, 32.0%) | 850    | 110   | 12.9% | (10.9%, 15.4%) | 16.3% | (12.8%, 19.8%) |
| <b>Alberta<sup>b</sup></b>                 | 333    | 96     | 28.8% | (24.2%, 33.9%) | 483    | 44    | 9.1%  | (6.9%, 12.0%)  | 19.7% | (14.2%, 25.2%) |
| <b>Atlantic Canada<sup>b</sup>\$</b>       | 280    | 95     | 33.9% | (28.6%, 39.7%) | 450    | 60    | 13.3% | (10.5%, 16.8%) | 20.6% | (14.2%, 27.0%) |
| <b>British Columbia<sup>b</sup>\$</b>      | 545    | 165    | 30.3% | (26.6%, 34.3%) | 755    | 85    | 11.3% | (9.2%, 13.7%)  | 19.0% | (14.5%, 23.5%) |
| <b>Ontario<sup>b</sup></b>                 | 2,279  | 401    | 17.6% | (16.1%, 19.2%) | 4,177  | 237   | 5.7%  | (5.0%, 6.4%)   | 11.9% | (10.2%, 13.6%) |
| <b>Saskatchewan-Manitoba<sup>b</sup>\$</b> | 255    | 85     | 33.3% | (27.8%, 39.3%) | 415    | 40    | 9.6%  | (7.2%, 12.9%)  | 23.7% | (17.2%, 30.1%) |
| <b>New South Wales<sup>n</sup></b>         | 2,036  | 416    | 20.4% | (18.7%, 22.2%) | 2,462  | 149   | 6.1%  | (5.2%, 7.1%)   | 14.4% | (12.4%, 16.4%) |
| <b>Victoria<sup>n</sup></b>                | 1,083  | 277    | 25.6% | (23.1%, 28.3%) | 2,089  | 143   | 6.8%  | (5.8%, 8.0%)   | 18.7% | (15.9%, 21.5%) |
| <b>New Zealand<sup>b</sup></b>             | 1,317  | 290    | 22.0% | (19.9%, 24.3%) | 865    | 56    | 6.5%  | (5.0%, 8.3%)   | 15.5% | (12.8%, 18.3%) |
| <b>Lung cancer</b>                         |        |        |       |                |        |       |       |                |       |                |
| <b>Denmark<sup>n</sup></b>                 | 5,818  | 1,276  | 21.9% | (20.9%, 23.0%) | 10,185 | 447   | 4.4%  | (4.0%, 4.8%)   | 17.5% | (16.4%, 18.7%) |
| <b>Norway<sup>b</sup></b>                  | 5,679  | 1,406  | 24.8% | (23.7%, 25.9%) | 8,723  | 449   | 5.1%  | (4.7%, 5.6%)   | 19.6% | (18.4%, 20.8%) |
| <b>England<sup>n</sup></b>                 | 46,951 | 17,140 | 36.5% | (36.1%, 36.9%) | 88,445 | 7,033 | 8.0%  | (7.8%, 8.1%)   | 28.6% | (28.1%, 29.0%) |
| <b>Northern Ireland<sup>n</sup></b>        | 1,843  | 644    | 34.9% | (32.8%, 37.1%) | 3,909  | 281   | 7.2%  | (6.4%, 8.0%)   | 27.8% | (25.4%, 30.1%) |
| <b>Scotland<sup>b</sup></b>                | 7,863  | 1,948  | 24.8% | (23.8%, 25.7%) | 10,799 | 615   | 5.7%  | (5.3%, 6.1%)   | 19.1% | (18.0%, 20.1%) |
| <b>Wales<sup>b</sup></b>                   | 3,882  | 1,147  | 29.5% | (28.1%, 31.0%) | 5,483  | 325   | 5.9%  | (5.3%, 6.6%)   | 23.6% | (22.1%, 25.2%) |
| <b>Alberta<sup>b</sup></b>                 | 1,169  | 295    | 25.2% | (22.8%, 27.8%) | 2,347  | 153   | 6.5%  | (5.6%, 7.6%)   | 18.7% | (16.0%, 21.4%) |
| <b>Atlantic Canada<sup>b</sup>\$</b>       | 1,155  | 350    | 30.3% | (27.7%, 33.0%) | 3,310  | 245   | 7.4%  | (6.6%, 8.3%)   | 22.9% | (20.1%, 25.7%) |
| <b>British Columbia<sup>b</sup>\$</b>      | 2,015  | 615    | 30.5% | (28.5%, 32.6%) | 4,000  | 245   | 6.1%  | (5.4%, 6.9%)   | 24.4% | (22.3%, 26.5%) |
| <b>Ontario<sup>b</sup></b>                 | 9,640  | 1,946  | 20.2% | (19.4%, 21.0%) | 25,452 | 1,058 | 4.2%  | (3.9%, 4.4%)   | 16.0% | (15.2%, 16.9%) |
| <b>Saskatchewan-Manitoba<sup>b</sup>\$</b> | 980    | 295    | 30.1% | (27.3%, 33.0%) | 2,210  | 155   | 7.0%  | (6.0%, 8.2%)   | 23.1% | (20.0%, 26.2%) |
| <b>New South Wales<sup>n</sup></b>         | 5,941  | 1,185  | 19.9% | (18.9%, 21.0%) | 10,393 | 386   | 3.7%  | (3.4%, 4.1%)   | 16.2% | (15.2%, 17.3%) |
| <b>Victoria<sup>n</sup></b>                | 2,954  | 637    | 21.6% | (20.1%, 23.1%) | 7,666  | 356   | 4.6%  | (4.2%, 5.1%)   | 16.9% | (15.4%, 18.5%) |
| <b>New Zealand<sup>b</sup></b>             | 4,330  | 931    | 21.5% | (20.3%, 22.7%) | 4,151  | 154   | 3.7%  | (3.2%, 4.3%)   | 17.8% | (16.4%, 19.1%) |
| <b>Ovarian cancer</b>                      |        |        |       |                |        |       |       |                |       |                |
| <b>Denmark<sup>n</sup></b>                 | 393    | 53     | 13.5% | (10.5%, 17.2%) | 1,515  | 24    | 1.6%  | (1.1%, 2.3%)   | 11.9% | (8.5%, 15.3%)  |
| <b>Norway<sup>b</sup></b>                  | 911    | 126    | 13.8% | (11.7%, 16.2%) | 1,696  | 28    | 1.7%  | (1.1%, 2.4%)   | 12.2% | (9.9%, 14.5%)  |
| <b>England<sup>n</sup></b>                 | 7,120  | 1,443  | 20.3% | (19.3%, 21.2%) | 13,326 | 466   | 3.5%  | (3.2%, 3.8%)   | 16.8% | (15.8%, 17.8%) |
| <b>Northern Ireland<sup>n</sup></b>        | 243    | 45     | 18.5% | (14.1%, 23.9%) | 578    | 28    | 4.8%  | (3.4%, 6.9%)   | 13.7% | (8.5%, 18.9%)  |
| <b>Scotland<sup>b</sup></b>                | 909    | 129    | 14.2% | (12.1%, 16.6%) | 1,214  | 46    | 3.8%  | (2.9%, 5.0%)   | 10.4% | (7.9%, 12.9%)  |
| <b>Wales<sup>b</sup></b>                   | 643    | 87     | 13.5% | (11.1%, 16.4%) | 933    | 24    | 2.6%  | (1.7%, 3.8%)   | 11.0% | (8.1%, 13.8%)  |
| <b>Alberta<sup>b</sup></b>                 | 103    | 8      | 7.8%  | (4.0%, 14.6%)  | 346    | 11    | 3.2%  | (1.8%, 5.6%)   | 4.6%  | (-0.9%, 10.1%) |
| <b>Atlantic Canada<sup>b</sup>\$</b>       | 115    | 30     | 26.1% | (18.9%, 34.8%) | 300    | 10    | 3.3%  | (1.8%, 6.0%)   | 22.8% | (14.5%, 31.0%) |
| <b>British Columbia<sup>b</sup>\$</b>      | 250    | 40     | 16.0% | (12.0%, 21.1%) | 505    | 15    | 3.0%  | (1.8%, 4.8%)   | 13.0% | (8.3%, 17.8%)  |
| <b>Ontario<sup>b</sup></b>                 | 1,164  | 166    | 14.3% | (12.4%, 16.4%) | 3,716  | 59    | 1.6%  | (1.2%, 2.0%)   | 12.7% | (10.6%, 14.7%) |
| <b>Saskatchewan-Manitoba<sup>b</sup>\$</b> | 110    | 20     | 18.2% | (12.1%, 26.4%) | 255    | 10    | 3.9%  | (2.1%, 7.1%)   | 14.3% | (6.7%, 21.9%)  |
| <b>New South Wales<sup>n</sup></b>         | 649    | 94     | 14.5% | (12.0%, 17.4%) | 1,638  | 27    | 1.6%  | (1.1%, 2.4%)   | 12.8% | (10.1%, 15.6%) |
| <b>Victoria<sup>n</sup></b>                | 363    | 51     | 14.0% | (10.9%, 18.0%) | 1,376  | 27    | 2.0%  | (1.4%, 2.8%)   | 12.1% | (8.4%, 15.7%)  |
| <b>New Zealand<sup>b</sup></b>             | 684    | 72     | 10.5% | (8.4%, 13.1%)  | 739    | 11    | 1.5%  | (0.8%, 2.6%)   | 9.0%  | (6.6%, 11.5%)  |

EP: Emergency Presentation; CI: Confidence interval, 1m: 1-month

\$ To comply with requirements for minimising residual disclosure risk, all actual counts for these jurisdictions were randomly rounded to a higher or lower multiple of 5 within cells. Sample sizes used in different aspects of the analysis may vary minimally for this reason.



## B. 3-month mortality

| Jurisdiction                          | EP       |             |             |                | Non-EP   |             |             |                | Difference, EP - non-EP |                |
|---------------------------------------|----------|-------------|-------------|----------------|----------|-------------|-------------|----------------|-------------------------|----------------|
|                                       | Patients | Deaths (3m) | Mortality % | (95% CI)       | Patients | Deaths (3m) | Mortality % | (95% CI)       | %-point                 | (95% CI)       |
| <i>Oesophageal cancer</i>             |          |             |             |                |          |             |             |                |                         |                |
| Denmark <sup>a</sup>                  | 461      | 191         | 41.4%       | (37.0%, 46.0%) | 1,435    | 195         | 13.6%       | (11.9%, 15.5%) | 27.8%                   | (23.0%, 32.7%) |
| Norway <sup>b</sup>                   | 435      | 158         | 36.3%       | (31.9%, 40.9%) | 897      | 98          | 10.9%       | (9.0%, 13.1%)  | 25.4%                   | (20.4%, 30.4%) |
| England <sup>a</sup>                  | 5,364    | 2,951       | 55.0%       | (53.7%, 56.3%) | 21,910   | 3,167       | 14.5%       | (14.0%, 14.9%) | 40.6%                   | (39.1%, 42.0%) |
| Northern Ireland <sup>a</sup>         | 193      | 83          | 43.0%       | (36.2%, 50.1%) | 779      | 105         | 13.5%       | (11.3%, 16.1%) | 29.5%                   | (22.1%, 36.9%) |
| Scotland <sup>b</sup>                 | 851      | 406         | 47.7%       | (44.4%, 51.1%) | 2,527    | 334         | 13.2%       | (12.0%, 14.6%) | 34.5%                   | (30.9%, 38.1%) |
| Wales <sup>b</sup>                    | 435      | 224         | 51.5%       | (46.8%, 56.2%) | 1,268    | 203         | 16.0%       | (14.1%, 18.1%) | 35.5%                   | (30.4%, 40.6%) |
| Alberta <sup>b</sup>                  | 76       | 37          | 48.7%       | (37.8%, 59.7%) | 276      | 37          | 13.4%       | (9.9%, 17.9%)  | 35.3%                   | (23.3%, 47.2%) |
| Atlantic Canada <sup>b</sup> \$       | 70       | 25          | 35.7%       | (25.5%, 47.4%) | 260      | 50          | 19.2%       | (14.9%, 24.5%) | 16.5%                   | (4.3%, 28.7%)  |
| British Columbia <sup>b</sup> \$      | 140      | 55          | 39.3%       | (31.6%, 47.6%) | 425      | 70          | 16.5%       | (13.2%, 20.3%) | 22.8%                   | (14.0%, 31.6%) |
| Ontario <sup>b</sup>                  | 630      | 292         | 46.3%       | (42.5%, 50.3%) | 2,469    | 340         | 13.8%       | (12.5%, 15.2%) | 32.6%                   | (28.5%, 36.7%) |
| Saskatchewan-Manitoba <sup>b</sup> \$ | 40       | 25          | 62.5%       | (47.0%, 75.8%) | 185      | 30          | 16.2%       | (11.6%, 22.2%) | 46.3%                   | (30.4%, 62.2%) |
| New South Wales <sup>a</sup>          | 530      | 211         | 39.8%       | (35.7%, 44.0%) | 1,440    | 185         | 12.8%       | (11.2%, 14.7%) | 27.0%                   | (22.5%, 31.5%) |
| Victoria <sup>a</sup>                 | 315      | 146         | 46.3%       | (40.9%, 51.9%) | 1,261    | 145         | 11.5%       | (9.9%, 13.4%)  | 34.9%                   | (29.1%, 40.6%) |
| New Zealand <sup>b</sup>              | 440      | 166         | 37.7%       | (33.3%, 42.3%) | 756      | 93          | 12.3%       | (10.1%, 14.8%) | 25.4%                   | (20.3%, 30.5%) |
| <i>Stomach cancer</i>                 |          |             |             |                |          |             |             |                |                         |                |
| Denmark <sup>a</sup>                  | 719      | 273         | 38.0%       | (34.5%, 41.6%) | 1,512    | 178         | 11.8%       | (10.2%, 13.5%) | 26.2%                   | (22.3%, 30.1%) |
| Norway <sup>b</sup>                   | 943      | 323         | 34.3%       | (31.3%, 37.3%) | 1,414    | 132         | 9.3%        | (7.9%, 11.0%)  | 24.9%                   | (21.5%, 28.3%) |
| England <sup>a</sup>                  | 6,224    | 3,297       | 53.0%       | (51.7%, 54.2%) | 13,589   | 2,372       | 17.5%       | (16.8%, 18.1%) | 35.5%                   | (34.1%, 36.9%) |
| Northern Ireland <sup>a</sup>         | 293      | 157         | 53.6%       | (47.9%, 59.2%) | 697      | 119         | 17.1%       | (14.5%, 20.0%) | 36.5%                   | (30.2%, 42.9%) |
| Scotland <sup>b</sup>                 | 913      | 425         | 46.5%       | (43.3%, 49.8%) | 1,424    | 221         | 15.5%       | (13.7%, 17.5%) | 31.0%                   | (27.3%, 34.8%) |
| Wales <sup>b</sup>                    | 648      | 317         | 48.9%       | (45.1%, 52.8%) | 1,008    | 185         | 18.4%       | (16.1%, 20.9%) | 30.6%                   | (26.0%, 35.1%) |
| Alberta <sup>b</sup>                  | 161      | 69          | 42.9%       | (35.5%, 50.6%) | 323      | 56          | 17.3%       | (13.6%, 21.8%) | 25.5%                   | (16.8%, 34.2%) |
| Atlantic Canada <sup>b</sup> \$       | 180      | 85          | 47.2%       | (40.1%, 54.5%) | 400      | 70          | 17.5%       | (14.1%, 21.5%) | 29.7%                   | (21.5%, 37.9%) |
| British Columbia <sup>b</sup> \$      | 315      | 120         | 38.1%       | (32.9%, 43.6%) | 450      | 75          | 16.7%       | (13.5%, 20.4%) | 21.4%                   | (15.1%, 27.8%) |
| Ontario <sup>b</sup>                  | 1,738    | 678         | 39.0%       | (36.7%, 41.3%) | 4,727    | 592         | 12.5%       | (11.6%, 13.5%) | 26.5%                   | (24.0%, 29.0%) |
| Saskatchewan-Manitoba <sup>b</sup> \$ | 150      | 60          | 40.0%       | (32.5%, 48.0%) | 285      | 40          | 14.0%       | (10.5%, 18.5%) | 26.0%                   | (17.1%, 34.8%) |
| New South Wales <sup>a</sup>          | 969      | 322         | 33.2%       | (30.3%, 36.3%) | 2,210    | 217         | 9.8%        | (8.6%, 11.1%)  | 23.4%                   | (20.2%, 26.6%) |
| Victoria <sup>a</sup>                 | 616      | 232         | 37.7%       | (33.9%, 41.6%) | 1,981    | 191         | 9.6%        | (8.4%, 11.0%)  | 28.0%                   | (24.0%, 32.1%) |
| New Zealand <sup>b</sup>              | 726      | 295         | 40.6%       | (37.1%, 44.2%) | 794      | 99          | 12.5%       | (10.3%, 14.9%) | 28.2%                   | (23.9%, 32.4%) |
| <i>Colon cancer</i>                   |          |             |             |                |          |             |             |                |                         |                |
| Denmark <sup>a</sup>                  | 3,655    | 781         | 21.4%       | (20.1%, 22.7%) | 9,273    | 456         | 4.9%        | (4.5%, 5.4%)   | 16.5%                   | (15.1%, 17.9%) |
| Norway <sup>b</sup>                   | 5,354    | 1,091       | 20.4%       | (19.3%, 21.5%) | 9,587    | 474         | 4.9%        | (4.5%, 5.4%)   | 15.4%                   | (14.3%, 16.6%) |
| England <sup>a</sup>                  | 25,859   | 8,789       | 34.0%       | (33.4%, 34.6%) | 62,360   | 5,084       | 8.2%        | (7.9%, 8.4%)   | 25.8%                   | (25.2%, 26.5%) |
| Northern Ireland <sup>a</sup>         | 914      | 274         | 30.0%       | (27.1%, 33.0%) | 2,932    | 212         | 7.2%        | (6.3%, 8.2%)   | 22.7%                   | (19.6%, 25.9%) |
| Scotland <sup>b</sup>                 | 3,366    | 996         | 29.6%       | (28.1%, 31.2%) | 6,234    | 457         | 7.3%        | (6.7%, 8.0%)   | 22.3%                   | (20.6%, 23.9%) |
| Wales <sup>b</sup>                    | 2,102    | 684         | 32.5%       | (30.6%, 34.6%) | 4,040    | 316         | 7.8%        | (7.0%, 8.7%)   | 24.7%                   | (22.6%, 26.9%) |
| Alberta <sup>b</sup>                  | 747      | 175         | 23.4%       | (20.5%, 26.6%) | 1,633    | 103         | 6.3%        | (5.2%, 7.6%)   | 17.1%                   | (13.9%, 20.4%) |
| Atlantic Canada <sup>b</sup> \$       | 850      | 155         | 18.2%       | (15.8%, 21.0%) | 2,205    | 120         | 5.4%        | (4.6%, 6.5%)   | 12.8%                   | (10.0%, 15.6%) |
| British Columbia <sup>b</sup> \$      | 1,360    | 235         | 17.3%       | (15.4%, 19.4%) | 3,185    | 145         | 4.6%        | (3.9%, 5.3%)   | 12.7%                   | (10.6%, 14.9%) |
| Ontario <sup>b</sup>                  | 6,653    | 1,186       | 17.8%       | (16.9%, 18.8%) | 17,828   | 816         | 4.6%        | (4.3%, 4.9%)   | 13.2%                   | (12.3%, 14.2%) |
| Saskatchewan-Manitoba <sup>b</sup> \$ | 635      | 115         | 18.1%       | (15.3%, 21.3%) | 1,645    | 85          | 5.2%        | (4.2%, 6.3%)   | 12.9%                   | (9.8%, 16.1%)  |

|                                            |        |       |       |                |        |       |       |                |       |                |
|--------------------------------------------|--------|-------|-------|----------------|--------|-------|-------|----------------|-------|----------------|
| <b>New South Wales<sup>n</sup></b>         | 4,499  | 783   | 17.4% | (16.3%, 18.5%) | 11,817 | 444   | 3.8%  | (3.4%, 4.1%)   | 13.6% | (12.5%, 14.8%) |
| <b>Victoria<sup>n</sup></b>                | 2,689  | 465   | 17.3% | (15.9%, 18.8%) | 9,058  | 374   | 4.1%  | (3.7%, 4.6%)   | 13.2% | (11.7%, 14.7%) |
| <b>New Zealand<sup>b</sup></b>             | 3,480  | 731   | 21.0% | (19.7%, 22.4%) | 6,022  | 273   | 4.5%  | (4.0%, 5.1%)   | 16.5% | (15.0%, 17.9%) |
| <b>Rectal cancer</b>                       |        |       |       |                |        |       |       |                |       |                |
| <b>Denmark<sup>n</sup></b>                 | 811    | 144   | 17.8% | (15.3%, 20.5%) | 5,194  | 167   | 3.2%  | (2.8%, 3.7%)   | 14.5% | (11.9%, 17.2%) |
| <b>Norway<sup>b</sup></b>                  | 888    | 169   | 19.0% | (16.6%, 21.7%) | 4,724  | 118   | 2.5%  | (2.1%, 3.0%)   | 16.5% | (13.9%, 19.2%) |
| <b>England<sup>n</sup></b>                 | 3,628  | 1,287 | 35.5% | (33.9%, 37.0%) | 30,277 | 1,349 | 4.5%  | (4.2%, 4.7%)   | 31.0% | (29.4%, 32.6%) |
| <b>Northern Ireland<sup>n</sup></b>        | 125    | 47    | 37.6% | (29.6%, 46.3%) | 1,251  | 50    | 4.0%  | (3.0%, 5.2%)   | 33.6% | (25.0%, 42.2%) |
| <b>Scotland<sup>b</sup></b>                | 499    | 139   | 27.9% | (24.1%, 31.9%) | 3,036  | 95    | 3.1%  | (2.6%, 3.8%)   | 24.7% | (20.7%, 28.7%) |
| <b>Wales<sup>b</sup></b>                   | 355    | 127   | 35.8% | (31.0%, 40.9%) | 2,222  | 102   | 4.6%  | (3.8%, 5.5%)   | 31.2% | (26.1%, 36.2%) |
| <b>Alberta<sup>b</sup></b>                 | 136    | 28    | 20.6% | (14.6%, 28.1%) | 817    | 30    | 3.7%  | (2.6%, 5.2%)   | 16.9% | (10.0%, 23.8%) |
| <b>Atlantic Canada<sup>b</sup>\$</b>       | 125    | 40    | 32.0% | (24.5%, 40.6%) | 935    | 45    | 4.8%  | (3.6%, 6.4%)   | 27.2% | (18.9%, 35.5%) |
| <b>British Columbia<sup>b</sup>\$</b>      | 220    | 50    | 22.7% | (17.7%, 28.7%) | 1,430  | 40    | 2.8%  | (2.1%, 3.8%)   | 19.9% | (14.3%, 25.5%) |
| <b>Ontario<sup>b</sup></b>                 | 860    | 179   | 20.8% | (18.2%, 23.7%) | 6,985  | 181   | 2.6%  | (2.2%, 3.0%)   | 18.2% | (15.5%, 21.0%) |
| <b>Saskatchewan-Manitoba<sup>b</sup>\$</b> | 120    | 35    | 29.2% | (21.8%, 37.8%) | 795    | 35    | 4.4%  | (3.2%, 6.1%)   | 24.8% | (16.5%, 33.0%) |
| <b>New South Wales<sup>n</sup></b>         | 660    | 107   | 16.2% | (13.6%, 19.2%) | 4,799  | 108   | 2.3%  | (1.9%, 2.7%)   | 14.0% | (11.1%, 16.8%) |
| <b>Victoria<sup>n</sup></b>                | 403    | 75    | 18.6% | (15.1%, 22.7%) | 4,035  | 94    | 2.3%  | (1.9%, 2.8%)   | 16.3% | (12.5%, 20.1%) |
| <b>New Zealand<sup>b</sup></b>             | 643    | 105   | 16.3% | (13.7%, 19.4%) | 2,604  | 77    | 3.0%  | (2.4%, 3.7%)   | 13.4% | (10.4%, 16.3%) |
| <b>Liver cancer</b>                        |        |       |       |                |        |       |       |                |       |                |
| <b>Denmark<sup>n</sup></b>                 | 668    | 373   | 55.8% | (52.0%, 59.6%) | 873    | 162   | 18.6% | (16.1%, 21.3%) | 37.3% | (32.7%, 41.8%) |
| <b>Norway<sup>b</sup></b>                  | 597    | 329   | 55.1% | (51.1%, 59.1%) | 584    | 127   | 21.7% | (18.6%, 25.3%) | 33.4% | (28.2%, 38.6%) |
| <b>England<sup>n</sup></b>                 | 7,497  | 4,591 | 61.2% | (60.1%, 62.3%) | 10,202 | 2,341 | 22.9% | (22.1%, 23.8%) | 38.3% | (36.9%, 39.7%) |
| <b>Northern Ireland<sup>n</sup></b>        | 215    | 153   | 71.2% | (64.8%, 76.8%) | 367    | 93    | 25.3% | (21.2%, 30.0%) | 45.8% | (38.3%, 53.3%) |
| <b>Scotland<sup>b</sup></b>                | 1,111  | 580   | 52.2% | (49.3%, 55.1%) | 1,229  | 197   | 16.0% | (14.1%, 18.2%) | 36.2% | (32.6%, 39.8%) |
| <b>Wales<sup>b</sup></b>                   | 583    | 342   | 58.7% | (54.6%, 62.6%) | 572    | 123   | 21.5% | (18.3%, 25.1%) | 37.2% | (31.9%, 42.4%) |
| <b>Alberta<sup>b</sup></b>                 | 152    | 86    | 56.6% | (48.6%, 64.2%) | 338    | 63    | 18.6% | (14.8%, 23.1%) | 37.9% | (29.0%, 46.8%) |
| <b>Atlantic Canada<sup>b</sup>\$</b>       | 115    | 75    | 65.2% | (56.1%, 73.3%) | 210    | 60    | 28.6% | (22.9%, 35.0%) | 36.6% | (26.0%, 47.3%) |
| <b>British Columbia<sup>b</sup>\$</b>      | 345    | 210   | 60.9% | (55.6%, 65.9%) | 535    | 125   | 23.4% | (20.0%, 27.1%) | 37.5% | (31.2%, 43.8%) |
| <b>Ontario<sup>b</sup></b>                 | 1,167  | 493   | 42.2% | (39.4%, 45.1%) | 2,962  | 392   | 13.2% | (12.1%, 14.5%) | 29.0% | (25.9%, 32.1%) |
| <b>Saskatchewan-Manitoba<sup>b</sup>\$</b> | 105    | 55    | 52.4% | (42.9%, 61.7%) | 190    | 55    | 28.9% | (23.0%, 35.8%) | 23.4% | (11.9%, 35.0%) |
| <b>New South Wales<sup>n</sup></b>         | 1,161  | 584   | 50.3% | (47.4%, 53.2%) | 1,994  | 280   | 14.0% | (12.6%, 15.6%) | 36.3% | (33.0%, 39.5%) |
| <b>Victoria<sup>n</sup></b>                | 742    | 315   | 42.5% | (38.9%, 46.0%) | 1,581  | 231   | 14.6% | (13.0%, 16.4%) | 27.8% | (23.9%, 31.8%) |
| <b>New Zealand<sup>b</sup></b>             | 618    | 310   | 50.2% | (46.2%, 54.1%) | 625    | 78    | 12.5% | (10.1%, 15.3%) | 37.7% | (33.0%, 42.4%) |
| <b>Pancreatic cancer</b>                   |        |       |       |                |        |       |       |                |       |                |
| <b>Denmark<sup>n</sup></b>                 | 1,674  | 907   | 54.2% | (51.8%, 56.6%) | 1,817  | 481   | 26.5% | (24.5%, 28.5%) | 27.7% | (24.6%, 30.8%) |
| <b>Norway<sup>b</sup></b>                  | 2,059  | 1,173 | 57.0% | (54.8%, 59.1%) | 1,656  | 448   | 27.1% | (25.0%, 29.2%) | 29.9% | (26.9%, 32.9%) |
| <b>England<sup>n</sup></b>                 | 14,291 | 9,329 | 65.3% | (64.5%, 66.1%) | 16,151 | 5,597 | 34.7% | (33.9%, 35.4%) | 30.6% | (29.6%, 31.7%) |
| <b>Northern Ireland<sup>n</sup></b>        | 496    | 367   | 74.0% | (70.0%, 77.7%) | 666    | 215   | 32.3% | (28.8%, 35.9%) | 41.7% | (36.5%, 47.0%) |
| <b>Scotland<sup>b</sup></b>                | 1,809  | 1,012 | 55.9% | (53.6%, 58.2%) | 1,245  | 396   | 31.8% | (29.3%, 34.4%) | 24.1% | (20.7%, 27.6%) |
| <b>Wales<sup>b</sup></b>                   | 1,115  | 640   | 57.4% | (54.5%, 60.3%) | 850    | 300   | 35.3% | (32.2%, 38.6%) | 22.1% | (17.8%, 26.4%) |
| <b>Alberta<sup>b</sup></b>                 | 333    | 192   | 57.7% | (52.3%, 62.8%) | 483    | 136   | 28.2% | (24.3%, 32.3%) | 29.5% | (22.8%, 36.2%) |
| <b>Atlantic Canada<sup>b</sup>\$</b>       | 280    | 165   | 58.9% | (53.1%, 64.5%) | 450    | 155   | 34.4% | (30.2%, 38.9%) | 24.5% | (17.2%, 31.7%) |
| <b>British Columbia<sup>b</sup>\$</b>      | 550    | 325   | 59.1% | (54.9%, 63.1%) | 755    | 240   | 31.8% | (28.6%, 35.2%) | 27.3% | (22.0%, 32.6%) |
| <b>Ontario<sup>b</sup></b>                 | 2,279  | 948   | 41.6% | (39.6%, 43.6%) | 4,177  | 964   | 23.1% | (21.8%, 24.4%) | 18.5% | (16.1%, 20.9%) |
| <b>Saskatchewan-Manitoba<sup>b</sup>\$</b> | 250    | 155   | 62.0% | (55.8%, 67.8%) | 405    | 140   | 34.6% | (30.1%, 39.3%) | 27.4% | (19.8%, 35.0%) |
| <b>New South Wales<sup>n</sup></b>         | 2,036  | 940   | 46.2% | (44.0%, 48.3%) | 2,462  | 539   | 21.9% | (20.3%, 23.6%) | 24.3% | (21.6%, 27.0%) |

|                                             |        |        |       |                |        |        |       |                |       |                |
|---------------------------------------------|--------|--------|-------|----------------|--------|--------|-------|----------------|-------|----------------|
| <b>Victoria <sup>n</sup></b>                | 1,083  | 481    | 44.4% | (41.5%, 47.4%) | 2,089  | 460    | 22.0% | (20.3%, 23.8%) | 22.4% | (18.9%, 25.8%) |
| <b>New Zealand <sup>b</sup></b>             | 1,317  | 659    | 50.0% | (47.3%, 52.7%) | 865    | 245    | 28.3% | (25.4%, 31.4%) | 21.7% | (17.7%, 25.8%) |
| <b>Lung cancer</b>                          |        |        |       |                |        |        |       |                |       |                |
| <b>Denmark <sup>n</sup></b>                 | 5,818  | 2,486  | 42.7% | (41.5%, 44.0%) | 10,185 | 1,558  | 15.3% | (14.6%, 16.0%) | 27.4% | (26.0%, 28.9%) |
| <b>Norway <sup>b</sup></b>                  | 5,679  | 2,625  | 46.2% | (44.9%, 47.5%) | 8,723  | 1,134  | 13.0% | (12.3%, 13.7%) | 33.2% | (31.7%, 34.7%) |
| <b>England <sup>n</sup></b>                 | 46,951 | 29,788 | 63.4% | (63.0%, 63.9%) | 88,445 | 19,443 | 22.0% | (21.7%, 22.3%) | 41.5% | (40.9%, 42.0%) |
| <b>Northern Ireland <sup>n</sup></b>        | 1,843  | 1,224  | 66.4% | (64.2%, 68.5%) | 3,909  | 841    | 21.5% | (20.3%, 22.8%) | 44.9% | (42.4%, 47.4%) |
| <b>Scotland <sup>b</sup></b>                | 7,863  | 4,133  | 52.6% | (51.5%, 53.7%) | 10,799 | 2,179  | 20.2% | (19.4%, 20.9%) | 32.4% | (31.0%, 33.7%) |
| <b>Wales <sup>b</sup></b>                   | 3,882  | 2,223  | 57.3% | (55.7%, 58.8%) | 5,483  | 1,072  | 19.6% | (18.5%, 20.6%) | 37.7% | (35.8%, 39.6%) |
| <b>Alberta <sup>b</sup></b>                 | 1,169  | 596    | 51.0% | (48.1%, 53.8%) | 2,347  | 421    | 17.9% | (16.4%, 19.5%) | 33.0% | (29.8%, 36.3%) |
| <b>Atlantic Canada <sup>b</sup>\$</b>       | 1,165  | 655    | 56.2% | (53.4%, 59.0%) | 3,305  | 635    | 19.2% | (17.9%, 20.6%) | 37.0% | (33.9%, 40.2%) |
| <b>British Columbia <sup>b</sup>\$</b>      | 2,015  | 1,140  | 56.6% | (54.4%, 58.7%) | 4,005  | 740    | 18.5% | (17.3%, 19.7%) | 38.1% | (35.6%, 40.6%) |
| <b>Ontario <sup>b</sup></b>                 | 9,640  | 4,559  | 47.3% | (46.3%, 48.3%) | 25,452 | 3,841  | 15.1% | (14.7%, 15.5%) | 32.2% | (31.1%, 33.3%) |
| <b>Saskatchewan-Manitoba <sup>b</sup>\$</b> | 985    | 535    | 54.3% | (51.2%, 57.4%) | 2,215  | 455    | 20.5% | (18.9%, 22.3%) | 33.8% | (30.2%, 37.3%) |
| <b>New South Wales <sup>n</sup></b>         | 5,941  | 2,585  | 43.5% | (42.3%, 44.8%) | 10,393 | 1,421  | 13.7% | (13.0%, 14.3%) | 29.8% | (28.4%, 31.3%) |
| <b>Victoria <sup>n</sup></b>                | 2,954  | 1,339  | 45.3% | (43.5%, 47.1%) | 7,666  | 1,085  | 14.2% | (13.4%, 15.0%) | 31.2% | (29.2%, 33.1%) |
| <b>New Zealand <sup>b</sup></b>             | 4,330  | 2,053  | 47.4% | (45.9%, 48.9%) | 4,151  | 574    | 13.8% | (12.8%, 14.9%) | 33.6% | (31.8%, 35.4%) |
| <b>Ovarian cancer</b>                       |        |        |       |                |        |        |       |                |       |                |
| <b>Denmark <sup>n</sup></b>                 | 393    | 102    | 26.0% | (21.9%, 30.5%) | 1,515  | 75     | 5.0%  | (4.0%, 6.2%)   | 21.0% | (16.5%, 25.5%) |
| <b>Norway <sup>b</sup></b>                  | 911    | 209    | 22.9% | (20.3%, 25.8%) | 1,696  | 90     | 5.3%  | (4.3%, 6.5%)   | 17.6% | (14.7%, 20.6%) |
| <b>England <sup>n</sup></b>                 | 7,120  | 2,614  | 36.7% | (35.6%, 37.8%) | 13,326 | 1,131  | 8.5%  | (8.0%, 9.0%)   | 28.2% | (27.0%, 29.4%) |
| <b>Northern Ireland <sup>n</sup></b>        | 243    | 97     | 39.9% | (34.0%, 46.2%) | 578    | 67     | 11.6% | (9.2%, 14.5%)  | 28.3% | (21.6%, 35.0%) |
| <b>Scotland <sup>b</sup></b>                | 909    | 286    | 31.5% | (28.5%, 34.6%) | 1,214  | 120    | 9.9%  | (8.3%, 11.7%)  | 21.6% | (18.1%, 25.0%) |
| <b>Wales <sup>b</sup></b>                   | 643    | 176    | 27.4% | (24.1%, 30.9%) | 933    | 73     | 7.8%  | (6.3%, 9.7%)   | 19.5% | (15.7%, 23.4%) |
| <b>Alberta <sup>b</sup></b>                 | 103    | 25     | 24.3% | (17.0%, 33.4%) | 346    | 23     | 6.6%  | (4.5%, 9.8%)   | 17.6% | (8.9%, 26.3%)  |
| <b>Atlantic Canada <sup>b</sup>\$</b>       | 115    | 45     | 39.1% | (30.7%, 48.3%) | 305    | 30     | 9.8%  | (7.0%, 13.7%)  | 29.3% | (19.8%, 38.8%) |
| <b>British Columbia <sup>b</sup>\$</b>      | 250    | 75     | 30.0% | (24.7%, 35.9%) | 500    | 20     | 4.0%  | (2.6%, 6.1%)   | 26.0% | (20.1%, 31.9%) |
| <b>Ontario <sup>b</sup></b>                 | 1,164  | 331    | 28.4% | (25.9%, 31.1%) | 3,716  | 188    | 5.1%  | (4.4%, 5.8%)   | 23.4% | (20.7%, 26.1%) |
| <b>Saskatchewan-Manitoba <sup>b</sup>\$</b> | 105    | 35     | 33.3% | (25.0%, 42.8%) | 250    | 10     | 4.0%  | (2.2%, 7.2%)   | 29.3% | (20.0%, 38.7%) |
| <b>New South Wales <sup>n</sup></b>         | 649    | 159    | 24.5% | (21.3%, 28.0%) | 1,638  | 66     | 4.0%  | (3.2%, 5.1%)   | 20.5% | (17.0%, 23.9%) |
| <b>Victoria <sup>n</sup></b>                | 363    | 87     | 24.0% | (19.9%, 28.6%) | 1,376  | 59     | 4.3%  | (3.3%, 5.5%)   | 19.7% | (15.2%, 24.2%) |
| <b>New Zealand <sup>b</sup></b>             | 684    | 151    | 22.1% | (19.1%, 25.3%) | 739    | 35     | 4.7%  | (3.4%, 6.5%)   | 17.3% | (13.9%, 20.8%) |

EP: Emergency Presentation; CI: Confidence interval, 3m: 3-month

\$ To comply with requirements for minimising residual disclosure risk, all actual counts for these jurisdictions were randomly rounded to a higher or lower multiple of 5 within cells. Sample sizes used in different aspects of the analysis may vary minimally for this reason.

### C. 12-month mortality.

| Jurisdiction                          | EP       |              |             |                | Non-EP   |              |             |                | Difference, EP - non-EP |                |
|---------------------------------------|----------|--------------|-------------|----------------|----------|--------------|-------------|----------------|-------------------------|----------------|
|                                       | Patients | Deaths (12m) | Mortality % | (95% CI)       | Patients | Deaths (12m) | Mortality % | (95% CI)       | %-point                 | (95% CI)       |
| <i>Oesophageal cancer</i>             |          |              |             |                |          |              |             |                |                         |                |
| Denmark <sup>a</sup>                  | 461      | 353          | 76.6%       | (72.5%, 80.2%) | 1,435    | 666          | 46.4%       | (43.8%, 49.0%) | 30.2%                   | (25.5%, 34.8%) |
| Norway <sup>b</sup>                   | 435      | 320          | 73.6%       | (69.2%, 77.5%) | 897      | 385          | 42.9%       | (39.7%, 46.2%) | 30.6%                   | (25.4%, 35.9%) |
| England <sup>a</sup>                  | 5,364    | 4,499        | 83.9%       | (82.9%, 84.8%) | 21,910   | 10,859       | 49.6%       | (48.9%, 50.2%) | 34.3%                   | (33.1%, 35.5%) |
| Northern Ireland <sup>a</sup>         | 193      | 159          | 82.4%       | (76.4%, 87.1%) | 779      | 362          | 46.5%       | (43.0%, 50.0%) | 35.9%                   | (29.5%, 42.3%) |
| Scotland <sup>b</sup>                 | 851      | 696          | 81.8%       | (79.1%, 84.2%) | 2,527    | 1,289        | 51.0%       | (49.1%, 53.0%) | 30.8%                   | (27.5%, 34.0%) |
| Wales <sup>b</sup>                    | 435      | 349          | 80.2%       | (76.2%, 83.7%) | 1,268    | 647          | 51.0%       | (48.3%, 53.8%) | 29.2%                   | (24.6%, 33.8%) |
| Alberta <sup>b</sup>                  | 76       | 57           | 75.0%       | (64.2%, 83.4%) | 276      | 141          | 51.1%       | (45.2%, 56.9%) | 23.9%                   | (12.5%, 35.3%) |
| Atlantic Canada <sup>b</sup> \$       | 75       | 50           | 66.7%       | (55.4%, 76.3%) | 255      | 130          | 51.0%       | (44.9%, 57.1%) | 15.7%                   | (3.4%, 28.0%)  |
| British Columbia <sup>b</sup> \$      | 150      | 115          | 76.7%       | (69.3%, 82.7%) | 430      | 220          | 51.2%       | (46.4%, 55.9%) | 25.5%                   | (17.2%, 33.8%) |
| Ontario <sup>b</sup>                  | 630      | 491          | 77.9%       | (74.5%, 81.0%) | 2,469    | 1,219        | 49.4%       | (47.4%, 51.3%) | 28.6%                   | (24.8%, 32.4%) |
| Saskatchewan-Manitoba <sup>b</sup> \$ | 40       | 30           | 75.0%       | (59.8%, 85.8%) | 180      | 105          | 58.3%       | (51.0%, 65.3%) | 16.7%                   | (1.4%, 31.9%)  |
| New South Wales <sup>a</sup>          | 530      | 394          | 74.3%       | (70.5%, 77.9%) | 1,440    | 659          | 45.8%       | (43.2%, 48.3%) | 28.6%                   | (24.1%, 33.1%) |
| Victoria <sup>a</sup>                 | 315      | 238          | 75.6%       | (70.5%, 80.0%) | 1,261    | 545          | 43.2%       | (40.5%, 46.0%) | 32.3%                   | (26.9%, 37.8%) |
| New Zealand <sup>b</sup>              | 440      | 344          | 78.2%       | (74.1%, 81.8%) | 756      | 389          | 51.5%       | (47.9%, 55.0%) | 26.7%                   | (21.5%, 32.0%) |
| <i>Stomach cancer</i>                 |          |              |             |                |          |              |             |                |                         |                |
| Denmark <sup>a</sup>                  | 719      | 461          | 64.1%       | (60.5%, 67.5%) | 1,512    | 563          | 37.2%       | (34.8%, 39.7%) | 26.9%                   | (22.6%, 31.2%) |
| Norway <sup>b</sup>                   | 943      | 614          | 65.1%       | (62.0%, 68.1%) | 1,414    | 480          | 33.9%       | (31.5%, 36.5%) | 31.2%                   | (27.2%, 35.1%) |
| England <sup>a</sup>                  | 6,224    | 4,886        | 78.5%       | (77.5%, 79.5%) | 13,589   | 6,519        | 48.0%       | (47.1%, 48.8%) | 30.5%                   | (29.2%, 31.9%) |
| Northern Ireland <sup>a</sup>         | 293      | 245          | 83.6%       | (78.9%, 87.4%) | 697      | 338          | 48.5%       | (44.8%, 52.2%) | 35.1%                   | (29.5%, 40.8%) |
| Scotland <sup>b</sup>                 | 913      | 682          | 74.7%       | (71.8%, 77.4%) | 1,424    | 716          | 50.3%       | (47.7%, 52.9%) | 24.4%                   | (20.6%, 28.3%) |
| Wales <sup>b</sup>                    | 648      | 512          | 79.0%       | (75.7%, 82.0%) | 1,008    | 517          | 51.3%       | (48.2%, 54.4%) | 27.7%                   | (23.3%, 32.1%) |
| Alberta <sup>b</sup>                  | 161      | 103          | 64.0%       | (56.3%, 71.0%) | 323      | 149          | 46.1%       | (40.8%, 51.6%) | 17.8%                   | (8.7%, 27.0%)  |
| Atlantic Canada <sup>b</sup> \$       | 175      | 120          | 68.6%       | (61.4%, 75.0%) | 395      | 170          | 43.0%       | (38.2%, 48.0%) | 25.5%                   | (17.1%, 34.0%) |
| British Columbia <sup>b</sup> \$      | 315      | 210          | 66.7%       | (61.3%, 71.6%) | 445      | 185          | 41.6%       | (37.1%, 46.2%) | 25.1%                   | (18.2%, 32.0%) |
| Ontario <sup>b</sup>                  | 1,738    | 1,143        | 65.8%       | (63.5%, 68.0%) | 4,727    | 1,653        | 35.0%       | (33.6%, 36.3%) | 30.8%                   | (28.2%, 33.4%) |
| Saskatchewan-Manitoba <sup>b</sup> \$ | 140      | 90           | 64.3%       | (56.1%, 71.7%) | 295      | 125          | 42.4%       | (36.9%, 48.1%) | 21.9%                   | (12.2%, 31.6%) |
| New South Wales <sup>a</sup>          | 969      | 615          | 63.5%       | (60.4%, 66.4%) | 2,210    | 698          | 31.6%       | (29.7%, 33.6%) | 31.9%                   | (28.3%, 35.5%) |
| Victoria <sup>a</sup>                 | 616      | 407          | 66.1%       | (62.2%, 69.7%) | 1,981    | 698          | 35.2%       | (33.2%, 37.4%) | 30.8%                   | (26.5%, 35.1%) |
| New Zealand <sup>b</sup>              | 726      | 496          | 68.3%       | (64.8%, 71.6%) | 794      | 325          | 40.9%       | (37.6%, 44.4%) | 27.4%                   | (22.6%, 32.2%) |
| <i>Colon cancer</i>                   |          |              |             |                |          |              |             |                |                         |                |
| Denmark <sup>a</sup>                  | 3,655    | 1,292        | 35.3%       | (33.8%, 36.9%) | 9,273    | 1,109        | 12.0%       | (11.3%, 12.6%) | 23.4%                   | (21.7%, 25.1%) |
| Norway <sup>b</sup>                   | 5,354    | 1,953        | 36.5%       | (35.2%, 37.8%) | 9,587    | 1,163        | 12.1%       | (11.5%, 12.8%) | 24.3%                   | (22.9%, 25.8%) |
| England <sup>a</sup>                  | 25,859   | 13,412       | 51.9%       | (51.3%, 52.5%) | 62,360   | 12,563       | 20.1%       | (19.8%, 20.5%) | 31.7%                   | (31.0%, 32.4%) |
| Northern Ireland <sup>a</sup>         | 914      | 455          | 49.8%       | (46.5%, 53.0%) | 2,932    | 506          | 17.3%       | (15.9%, 18.7%) | 32.5%                   | (29.0%, 36.0%) |
| Scotland <sup>b</sup>                 | 3,366    | 1,706        | 50.7%       | (49.0%, 52.4%) | 6,234    | 1,242        | 19.9%       | (19.0%, 20.9%) | 30.8%                   | (28.8%, 32.7%) |
| Wales <sup>b</sup>                    | 2,102    | 1,070        | 50.9%       | (48.8%, 53.0%) | 4,040    | 850          | 21.0%       | (19.8%, 22.3%) | 29.9%                   | (27.4%, 32.3%) |
| Alberta <sup>b</sup>                  | 747      | 277          | 37.1%       | (33.7%, 40.6%) | 1,633    | 237          | 14.5%       | (12.9%, 16.3%) | 22.6%                   | (18.7%, 26.4%) |
| Atlantic Canada <sup>b</sup> \$       | 855      | 255          | 29.8%       | (26.9%, 33.0%) | 2,205    | 270          | 12.2%       | (10.9%, 13.7%) | 17.6%                   | (14.2%, 20.9%) |
| British Columbia <sup>b</sup> \$      | 1,360    | 380          | 27.9%       | (25.6%, 30.4%) | 3,190    | 335          | 10.5%       | (9.5%, 11.6%)  | 17.4%                   | (14.8%, 20.1%) |
| Ontario <sup>b</sup>                  | 6,653    | 2,197        | 33.0%       | (31.9%, 34.2%) | 17,828   | 1,970        | 11.1%       | (10.6%, 11.5%) | 22.0%                   | (20.8%, 23.2%) |
| Saskatchewan-Manitoba <sup>b</sup> \$ | 645      | 190          | 29.5%       | (26.1%, 33.1%) | 1,655    | 195          | 11.8%       | (10.3%, 13.4%) | 17.7%                   | (13.8%, 21.5%) |

|                                            |        |        |       |                |        |        |       |                |       |                |
|--------------------------------------------|--------|--------|-------|----------------|--------|--------|-------|----------------|-------|----------------|
| <b>New South Wales<sup>n</sup></b>         | 4,499  | 1,479  | 32.9% | (31.5%, 34.3%) | 11,817 | 1,235  | 10.5% | (9.9%, 11.0%)  | 22.4% | (20.9%, 23.9%) |
| <b>Victoria<sup>n</sup></b>                | 2,689  | 853    | 31.7% | (30.0%, 33.5%) | 9,058  | 1,000  | 11.0% | (10.4%, 11.7%) | 20.7% | (18.8%, 22.6%) |
| <b>New Zealand<sup>b</sup></b>             | 3,480  | 1,316  | 37.8% | (36.2%, 39.4%) | 6,022  | 820    | 13.6% | (12.8%, 14.5%) | 24.2% | (22.4%, 26.0%) |
| <b>Rectal cancer</b>                       |        |        |       |                |        |        |       |                |       |                |
| <b>Denmark<sup>n</sup></b>                 | 811    | 285    | 35.1% | (31.9%, 38.5%) | 5,194  | 505    | 9.7%  | (8.9%, 10.6%)  | 25.4% | (22.0%, 28.8%) |
| <b>Norway<sup>b</sup></b>                  | 888    | 324    | 36.5% | (33.4%, 39.7%) | 4,724  | 428    | 9.1%  | (8.3%, 9.9%)   | 27.4% | (24.2%, 30.7%) |
| <b>England<sup>n</sup></b>                 | 3,628  | 2,106  | 58.0% | (56.4%, 59.6%) | 30,277 | 4,135  | 13.7% | (13.3%, 14.0%) | 44.4% | (42.7%, 46.0%) |
| <b>Northern Ireland<sup>n</sup></b>        | 125    | 74     | 59.2% | (50.4%, 67.4%) | 1,251  | 151    | 12.1% | (10.4%, 14.0%) | 47.1% | (38.3%, 55.9%) |
| <b>Scotland<sup>b</sup></b>                | 499    | 244    | 48.9% | (44.5%, 53.3%) | 3,036  | 404    | 13.3% | (12.1%, 14.6%) | 35.6% | (31.0%, 40.1%) |
| <b>Wales<sup>b</sup></b>                   | 355    | 201    | 56.6% | (51.4%, 61.7%) | 2,222  | 331    | 14.9% | (13.5%, 16.4%) | 41.7% | (36.4%, 47.1%) |
| <b>Alberta<sup>b</sup></b>                 | 136    | 55     | 40.4% | (32.6%, 48.8%) | 817    | 87     | 10.6% | (8.7%, 13.0%)  | 29.8% | (21.3%, 38.3%) |
| <b>Atlantic Canada<sup>b</sup>\$</b>       | 125    | 65     | 52.0% | (43.3%, 60.6%) | 935    | 115    | 12.3% | (10.3%, 14.6%) | 39.7% | (30.7%, 48.7%) |
| <b>British Columbia<sup>b</sup>\$</b>      | 225    | 90     | 40.0% | (33.8%, 46.5%) | 1,435  | 155    | 10.8% | (9.3%, 12.5%)  | 29.2% | (22.6%, 35.8%) |
| <b>Ontario<sup>b</sup></b>                 | 860    | 353    | 41.0% | (37.8%, 44.4%) | 6,985  | 663    | 9.5%  | (8.8%, 10.2%)  | 31.6% | (28.2%, 34.9%) |
| <b>Saskatchewan-Manitoba<sup>b</sup>\$</b> | 125    | 55     | 44.0% | (35.6%, 52.8%) | 795    | 95     | 11.9% | (9.9%, 14.4%)  | 32.1% | (23.1%, 41.0%) |
| <b>New South Wales<sup>n</sup></b>         | 660    | 258    | 39.1% | (35.4%, 42.9%) | 4,799  | 387    | 8.1%  | (7.3%, 8.9%)   | 31.0% | (27.2%, 34.8%) |
| <b>Victoria<sup>n</sup></b>                | 403    | 144    | 35.7% | (31.2%, 40.5%) | 4,035  | 324    | 8.0%  | (7.2%, 8.9%)   | 27.7% | (22.9%, 32.5%) |
| <b>New Zealand<sup>b</sup></b>             | 643    | 228    | 35.5% | (31.9%, 39.2%) | 2,604  | 275    | 10.6% | (9.4%, 11.8%)  | 24.9% | (21.0%, 28.8%) |
| <b>Liver cancer</b>                        |        |        |       |                |        |        |       |                |       |                |
| <b>Denmark<sup>n</sup></b>                 | 668    | 540    | 80.8% | (77.7%, 83.6%) | 873    | 418    | 47.9% | (44.6%, 51.2%) | 33.0% | (28.5%, 37.4%) |
| <b>Norway<sup>b</sup></b>                  | 597    | 450    | 75.4% | (71.8%, 78.7%) | 584    | 254    | 43.5% | (39.5%, 47.5%) | 31.9% | (26.6%, 37.2%) |
| <b>England<sup>n</sup></b>                 | 7,497  | 6,309  | 84.2% | (83.3%, 85.0%) | 10,202 | 5,332  | 52.3% | (51.3%, 53.2%) | 31.9% | (30.6%, 33.2%) |
| <b>Northern Ireland<sup>n</sup></b>        | 215    | 188    | 87.4% | (82.3%, 91.2%) | 367    | 195    | 53.1% | (48.0%, 58.2%) | 34.3% | (27.5%, 41.1%) |
| <b>Scotland<sup>b</sup></b>                | 1,111  | 892    | 80.3% | (77.8%, 82.5%) | 1,229  | 540    | 43.9% | (41.2%, 46.7%) | 36.3% | (32.7%, 40.0%) |
| <b>Wales<sup>b</sup></b>                   | 583    | 489    | 83.9% | (80.7%, 86.6%) | 572    | 302    | 52.8% | (48.7%, 56.9%) | 31.1% | (26.0%, 36.1%) |
| <b>Alberta<sup>b</sup></b>                 | 152    | 121    | 79.6% | (72.5%, 85.2%) | 338    | 129    | 38.2% | (33.1%, 43.5%) | 41.4% | (33.2%, 49.7%) |
| <b>Atlantic Canada<sup>b</sup>\$</b>       | 120    | 100    | 83.3% | (75.7%, 88.9%) | 220    | 115    | 52.3% | (45.7%, 58.8%) | 31.1% | (21.7%, 40.4%) |
| <b>British Columbia<sup>b</sup>\$</b>      | 340    | 290    | 85.3% | (81.1%, 88.7%) | 530    | 280    | 52.8% | (48.6%, 57.0%) | 32.5% | (26.8%, 38.1%) |
| <b>Ontario<sup>b</sup></b>                 | 1,167  | 838    | 71.8% | (69.2%, 74.3%) | 2,962  | 1,126  | 38.0% | (36.3%, 39.8%) | 33.8% | (30.7%, 36.9%) |
| <b>Saskatchewan-Manitoba<sup>b</sup>\$</b> | 110    | 85     | 77.3% | (68.6%, 84.1%) | 190    | 105    | 55.3% | (48.2%, 62.2%) | 22.0% | (11.5%, 32.6%) |
| <b>New South Wales<sup>n</sup></b>         | 1,161  | 875    | 75.4% | (72.8%, 77.8%) | 1,994  | 755    | 37.9% | (35.8%, 40.0%) | 37.5% | (34.2%, 40.8%) |
| <b>Victoria<sup>n</sup></b>                | 742    | 531    | 71.6% | (68.2%, 74.7%) | 1,581  | 566    | 35.8% | (33.5%, 38.2%) | 35.8% | (31.7%, 39.8%) |
| <b>New Zealand<sup>b</sup></b>             | 618    | 467    | 75.6% | (72.0%, 78.8%) | 625    | 254    | 40.6% | (36.9%, 44.5%) | 34.9% | (29.8%, 40.1%) |
| <b>Pancreatic cancer</b>                   |        |        |       |                |        |        |       |                |       |                |
| <b>Denmark<sup>n</sup></b>                 | 1,674  | 1,361  | 81.3% | (79.4%, 83.1%) | 1,817  | 1,097  | 60.4% | (58.1%, 62.6%) | 20.9% | (18.0%, 23.9%) |
| <b>Norway<sup>b</sup></b>                  | 2,059  | 1,730  | 84.0% | (82.4%, 85.5%) | 1,656  | 938    | 56.6% | (54.2%, 59.0%) | 27.4% | (24.5%, 30.2%) |
| <b>England<sup>n</sup></b>                 | 14,291 | 12,682 | 88.7% | (88.2%, 89.2%) | 16,151 | 11,100 | 68.7% | (68.0%, 69.4%) | 20.0% | (19.1%, 20.9%) |
| <b>Northern Ireland<sup>n</sup></b>        | 496    | 463    | 93.3% | (90.8%, 95.2%) | 666    | 451    | 67.7% | (64.1%, 71.2%) | 25.6% | (21.5%, 29.8%) |
| <b>Scotland<sup>b</sup></b>                | 1,809  | 1,508  | 83.4% | (81.6%, 85.0%) | 1,245  | 865    | 69.5% | (66.9%, 72.0%) | 13.9% | (10.8%, 17.0%) |
| <b>Wales<sup>b</sup></b>                   | 1,115  | 926    | 83.0% | (80.7%, 85.1%) | 850    | 576    | 67.8% | (64.5%, 70.8%) | 15.3% | (11.4%, 19.1%) |
| <b>Alberta<sup>b</sup></b>                 | 333    | 283    | 85.0% | (80.8%, 88.4%) | 483    | 311    | 64.4% | (60.0%, 68.5%) | 20.6% | (14.9%, 26.3%) |
| <b>Atlantic Canada<sup>b</sup>\$</b>       | 280    | 245    | 87.5% | (83.1%, 90.9%) | 450    | 325    | 72.2% | (67.9%, 76.2%) | 15.3% | (9.6%, 20.9%)  |
| <b>British Columbia<sup>b</sup>\$</b>      | 540    | 465    | 86.1% | (82.9%, 88.8%) | 755    | 515    | 68.2% | (64.8%, 71.4%) | 17.9% | (13.5%, 22.3%) |
| <b>Ontario<sup>b</sup></b>                 | 2,279  | 1,687  | 74.0% | (72.2%, 75.8%) | 4,177  | 2,402  | 57.5% | (56.0%, 59.0%) | 16.5% | (14.2%, 18.9%) |
| <b>Saskatchewan-Manitoba<sup>b</sup>\$</b> | 255    | 215    | 84.3% | (79.3%, 88.3%) | 415    | 285    | 68.7% | (64.1%, 72.9%) | 15.6% | (9.3%, 22.0%)  |
| <b>New South Wales<sup>n</sup></b>         | 2,036  | 1,570  | 77.1% | (75.2%, 78.9%) | 2,462  | 1,395  | 56.7% | (54.7%, 58.6%) | 20.5% | (17.8%, 23.1%) |

|                                             |        |        |       |                |        |        |       |                |       |                |
|---------------------------------------------|--------|--------|-------|----------------|--------|--------|-------|----------------|-------|----------------|
| <b>Victoria <sup>n</sup></b>                | 1,083  | 827    | 76.4% | (73.7%, 78.8%) | 2,089  | 1,132  | 54.2% | (52.0%, 56.3%) | 22.2% | (18.9%, 25.5%) |
| <b>New Zealand <sup>b</sup></b>             | 1,317  | 1,096  | 83.2% | (81.1%, 85.1%) | 865    | 598    | 69.1% | (66.0%, 72.1%) | 14.1% | (10.4%, 17.8%) |
| <b>Lung cancer</b>                          |        |        |       |                |        |        |       |                |       |                |
| <b>Denmark <sup>n</sup></b>                 | 5,818  | 4,119  | 70.8% | (69.6%, 72.0%) | 10,185 | 4,428  | 43.5% | (42.5%, 44.4%) | 27.3% | (25.8%, 28.8%) |
| <b>Norway <sup>b</sup></b>                  | 5,679  | 4,382  | 77.2% | (76.1%, 78.2%) | 8,723  | 3,383  | 38.8% | (37.8%, 39.8%) | 38.4% | (36.9%, 39.9%) |
| <b>England <sup>n</sup></b>                 | 46,951 | 40,499 | 86.3% | (85.9%, 86.6%) | 88,445 | 46,349 | 52.4% | (52.1%, 52.7%) | 33.9% | (33.4%, 34.3%) |
| <b>Northern Ireland <sup>n</sup></b>        | 1,843  | 1,659  | 90.0% | (88.6%, 91.3%) | 3,909  | 2,172  | 55.6% | (54.0%, 57.1%) | 34.5% | (32.4%, 36.5%) |
| <b>Scotland <sup>b</sup></b>                | 7,863  | 6,330  | 80.5% | (79.6%, 81.4%) | 10,799 | 5,594  | 51.8% | (50.9%, 52.7%) | 28.7% | (27.4%, 30.0%) |
| <b>Wales <sup>b</sup></b>                   | 3,882  | 3,211  | 82.7% | (81.5%, 83.9%) | 5,483  | 2,885  | 52.6% | (51.3%, 53.9%) | 30.1% | (28.3%, 31.9%) |
| <b>Alberta <sup>b</sup></b>                 | 1,169  | 907    | 77.6% | (75.1%, 79.9%) | 2,347  | 1,055  | 45.0% | (42.9%, 47.0%) | 32.6% | (29.5%, 35.8%) |
| <b>Atlantic Canada <sup>b</sup>\$</b>       | 1,155  | 945    | 81.8% | (79.5%, 83.9%) | 3,305  | 1,550  | 46.9% | (45.2%, 48.6%) | 34.9% | (32.1%, 37.7%) |
| <b>British Columbia <sup>b</sup>\$</b>      | 2,010  | 1,650  | 82.1% | (80.4%, 83.7%) | 4,005  | 1,795  | 44.8% | (43.3%, 46.4%) | 37.3% | (35.0%, 39.5%) |
| <b>Ontario <sup>b</sup></b>                 | 9,640  | 7,356  | 76.3% | (75.4%, 77.1%) | 25,452 | 10,617 | 41.7% | (41.1%, 42.3%) | 34.6% | (33.6%, 35.6%) |
| <b>Saskatchewan-Manitoba <sup>b</sup>\$</b> | 985    | 810    | 82.2% | (79.7%, 84.5%) | 2,205  | 1,015  | 46.0% | (44.0%, 48.1%) | 36.2% | (33.0%, 39.4%) |
| <b>New South Wales <sup>n</sup></b>         | 5,941  | 4,374  | 73.6% | (72.5%, 74.7%) | 10,393 | 4,307  | 41.4% | (40.5%, 42.4%) | 32.2% | (30.7%, 33.6%) |
| <b>Victoria <sup>n</sup></b>                | 2,954  | 2,192  | 74.2% | (72.6%, 75.8%) | 7,666  | 3,128  | 40.8% | (39.7%, 41.9%) | 33.4% | (31.5%, 35.3%) |
| <b>New Zealand <sup>b</sup></b>             | 4,330  | 3,341  | 77.2% | (75.9%, 78.4%) | 4,151  | 1,868  | 45.0% | (43.5%, 46.5%) | 32.2% | (30.2%, 34.1%) |
| <b>Ovarian cancer</b>                       |        |        |       |                |        |        |       |                |       |                |
| <b>Denmark <sup>n</sup></b>                 | 393    | 186    | 47.3% | (42.4%, 52.3%) | 1,515  | 227    | 15.0% | (13.3%, 16.9%) | 32.3% | (27.1%, 37.6%) |
| <b>Norway <sup>b</sup></b>                  | 911    | 334    | 36.7% | (33.6%, 39.8%) | 1,696  | 191    | 11.3% | (9.8%, 12.9%)  | 25.4% | (21.9%, 28.9%) |
| <b>England <sup>n</sup></b>                 | 7,120  | 3,868  | 54.3% | (53.2%, 55.5%) | 13,326 | 2,580  | 19.4% | (18.7%, 20.0%) | 35.0% | (33.6%, 36.3%) |
| <b>Northern Ireland <sup>n</sup></b>        | 243    | 137    | 56.4% | (50.1%, 62.5%) | 578    | 153    | 26.5% | (23.0%, 30.2%) | 29.9% | (22.7%, 37.1%) |
| <b>Scotland <sup>b</sup></b>                | 909    | 449    | 49.4% | (46.2%, 52.6%) | 1,214  | 260    | 21.4% | (19.2%, 23.8%) | 28.0% | (24.0%, 32.0%) |
| <b>Wales <sup>b</sup></b>                   | 643    | 259    | 40.3% | (36.6%, 44.1%) | 933    | 145    | 15.5% | (13.4%, 18.0%) | 24.7% | (20.3%, 29.2%) |
| <b>Alberta <sup>b</sup></b>                 | 103    | 48     | 46.6% | (37.3%, 56.2%) | 346    | 69     | 19.9% | (16.1%, 24.5%) | 26.7% | (16.1%, 37.2%) |
| <b>Atlantic Canada <sup>b</sup>\$</b>       | 120    | 75     | 62.5% | (53.6%, 70.6%) | 300    | 70     | 23.3% | (18.9%, 28.4%) | 39.2% | (29.3%, 49.1%) |
| <b>British Columbia <sup>b</sup>\$</b>      | 255    | 120    | 47.1% | (41.0%, 53.2%) | 505    | 70     | 13.9% | (11.1%, 17.1%) | 33.2% | (26.4%, 40.0%) |
| <b>Ontario <sup>b</sup></b>                 | 1,164  | 558    | 47.9% | (45.1%, 50.8%) | 3,716  | 547    | 14.7% | (13.6%, 15.9%) | 33.2% | (30.1%, 36.3%) |
| <b>Saskatchewan-Manitoba <sup>b</sup>\$</b> | 100    | 45     | 45.0% | (35.6%, 54.8%) | 250    | 30     | 12.0% | (8.5%, 16.6%)  | 33.0% | (22.5%, 43.5%) |
| <b>New South Wales <sup>n</sup></b>         | 649    | 271    | 41.8% | (38.0%, 45.6%) | 1,638  | 227    | 13.9% | (12.3%, 15.6%) | 27.9% | (23.8%, 32.0%) |
| <b>Victoria <sup>n</sup></b>                | 363    | 136    | 37.5% | (32.6%, 42.6%) | 1,376  | 164    | 11.9% | (10.3%, 13.7%) | 25.5% | (20.3%, 30.8%) |
| <b>New Zealand <sup>b</sup></b>             | 684    | 284    | 41.5% | (37.9%, 45.3%) | 739    | 124    | 16.8% | (14.3%, 19.6%) | 24.7% | (20.2%, 29.3%) |

EP: Emergency Presentation; CI: Confidence interval, 12m: 12-month

\$ To comply with requirements for minimising residual disclosure risk, all actual counts for these jurisdictions were randomly rounded to a higher or lower multiple of 5 within cells. Sample sizes used in different aspects of the analysis may vary minimally for this reason.

## **Supplementary Material 14. ICBP Module 9 Emergency Presentations Working Group co-authors**

Brooke Filsinger, MSc; Ontario study team.  
Katharina Forster, MD, PhD; Ontario study team.  
Leon May, MPH; Wales study team.  
David S Morrison, MD; Scotland study team.  
A. Ffion Thomas, MPH; Wales study team.  
Janet L Warlow, MSc; Wales study team.  
Hui You, MAppStat; New South Wales study team.
